# Supplementary material for: <em>Staphylococcus aureus </em>Stress Response to Bicarbonate Depletion
Source: Preprints.org preprint supplement (doi:10.20944/preprints202407.2401.v1), 2024-07-30
Supplement: Supplementary file 1 [file supplementary]

## Sheet: mt8h-WT8h
Short name UID	Function	baseMean	log2fold	Fold change
B7H15_00055	AzlC family ABC transporter permease	156.3	1.36685	2.57907
B7H15_00060	AzlD domain-containing protein	83.2847	1.54703	2.92214
B7H15_00090	hypothetical protein	15.2673	2.00633	4.01759
B7H15_00095	adenylosuccinate synthase	921.653	2.5138	5.71121
B7H15_00165	glycerophosphoryl diester phosphodiesterase	662.591	1.26601	2.40496
B7H15_00240	MBL fold metallo-hydrolase	80.3067	1.18787	2.27816
B7H15_00285	hypothetical protein	229.12	1.58432	2.99867
B7H15_00290	GNAT family N-acetyltransferase	287.339	1.35226	2.55312
B7H15_00460	persulfide response sulfurtransferase CstA	88.4898	2.92512	7.59535
B7H15_00465	persulfide dioxygenase-sulfurtransferase CstB	176.572	2.32255	5.00214
B7H15_00475	FAD-dependent pyridine nucleotide-disulfide oxidoreductase	584.181	1.13896	2.20222
B7H15_00590	Na/Pi cotransporter family protein	3985.14	2.60888	6.10028
B7H15_00595	oleate hydratase	466.684	1.1362	2.19802
B7H15_00745	superoxide dismutase	697.65	1.69008	3.22675
B7H15_00880	type 8 capsular polysaccharide synthesis protein Cap8F	83.7911	1.22793	2.3423
B7H15_00885	type 8 capsular polysaccharide synthesis protein Cap8G	108.003	1.08705	2.12439
B7H15_00910	type 8 capsular polysaccharide synthesis protein Cap8L	124.429	1.12227	2.17689
B7H15_00915	type 8 capsular polysaccharide synthesis protein Cap8M	99.6314	1.66006	3.16029
B7H15_00920	capsular polysaccharide type 5/8 biosynthesis epimerase CapN	167.609	1.57425	2.97781
B7H15_00925	type 8 capsular polysaccharide synthesis protein Cap8O	249.721	1.68559	3.21671
B7H15_00930	type 8 capsular polysaccharide synthesis protein Cap8P	315.902	1.17032	2.25061
B7H15_01135	FMN-dependent NADH-azoreductase	1536.17	3.31486	9.95111
B7H15_01140	M23 family metallopeptidase	84.4311	2.92608	7.60042
B7H15_01220	glycerophosphoryl diester phosphodiesterase membrane domain-containing protein	216.658	1.7769	3.4269
B7H15_01340	zinc-binding dehydrogenase	41.4905	1.27643	2.42239
B7H15_01370	CDP-glycerol--glycerophosphate glycerophosphotransferase	1001.55	2.569	5.93397
B7H15_01390	poly(ribitol-phosphate) beta-N-acetylglucosaminyltransferase	8260.09	1.10922	2.15728
B7H15_01430	glucose PTS transporter subunit IIA	70.3365	1.95947	3.8892
B7H15_01435	6-phospho-beta-glucosidase	153.335	1.44035	2.71387
B7H15_01500	glycine-glycine endopeptidase LytM	1534.71	3.06544	8.37124
B7H15_01645	TIGR01741 family protein	178.003	1.15059	2.22005
B7H15_01650	antitoxin YezG family protein	154.892	1.63493	3.10572
B7H15_01705	ABC transporter ATP-binding protein	1836.85	1.04298	2.06048
B7H15_01860	VOC family protein	992.532	1.95195	3.86896
B7H15_01865	LLM class flavin-dependent oxidoreductase	2010.81	2.33268	5.03739
B7H15_01870	NAD(P)H-dependent oxidoreductase	693.288	2.15906	4.46625
B7H15_01885	GNAT family N-acetyltransferase	238.473	1.00975	2.01356
B7H15_01890	EfeM/EfeO family lipoprotein	31.5521	1.31966	2.49607
B7H15_01895	deferrochelatase/peroxidase EfeB	57.5783	1.12877	2.18672
B7H15_01905	twin-arginine translocase subunit TatC	230.04	1.15248	2.22295
B7H15_01910	twin-arginine translocase TatA/TatE family subunit	179.173	2.60767	6.09519
B7H15_01915	DUF1398 family protein	230.768	3.71022	13.0884
B7H15_01940	low temperature requirement protein A	199.387	1.41208	2.6612
B7H15_01985	mechanosensitive ion channel family protein	307.697	1.08983	2.1285
B7H15_01990	DUF951 domain-containing protein	198.553	1.34501	2.54032
B7H15_02000	hypothetical protein	116.821	1.75994	3.38684
B7H15_02045	YxeA family protein	7.15543	2.36884	5.16526
B7H15_02055	helix-turn-helix domain-containing protein	711.591	1.69972	3.24839
B7H15_02180	DUF1304 domain-containing protein	483.351	1.11728	2.16938
B7H15_02185	SDR family oxidoreductase	793.922	1.08689	2.12415
B7H15_02195	superantigen-like protein SSL2	24.608	1.18419	2.27235
B7H15_02230	hypothetical protein	1.84412	3.50604	11.3612
B7H15_02245	superantigen-like protein SSL9	18.4164	1.16074	2.23573
B7H15_02320	tandem-type lipoprotein Lpl8	70.6065	1.29005	2.44537
B7H15_02325	tandem-type lipoprotein Lpl9	122.166	1.22173	2.33227
B7H15_02405	sodium-dependent transporter	88.3418	1.1963	2.29151
B7H15_02440	hypothetical protein	304.829	1.51311	2.85425
B7H15_02455	YibE/F family protein	522.268	1.33889	2.52957
B7H15_02460	YibE/F family protein	564.975	1.97611	3.9343
B7H15_02470	glutamate synthase large subunit	4081.92	4.6239	24.6565
B7H15_02475	glutamate synthase subunit beta	1876.55	4.11165	17.2874
B7H15_02505	hypothetical protein	5.13145	2.48318	5.59128
B7H15_02515	DNA polymerase III subunit gamma/tau	1917.2	1.28647	2.43931
B7H15_02560	dTMP kinase	278.659	1.0787	2.11214
B7H15_02610	ribonuclease M5	450.996	1.77597	3.42468
B7H15_02615	16S rRNA (adenine(1518)-N(6)/adenine(1519)-N(6))-dimethyltransferase RsmA	516.459	1.29863	2.45995
B7H15_02695	septum formation initiator family protein	529.724	1.1535	2.22453
B7H15_02720	Hsp33 family molecular chaperone HslO	577.51	1.16194	2.23758
B7H15_02855	CtsR family transcriptional regulator	1099.76	1.53074	2.88934
B7H15_02860	UvrB/UvrC motif-containing protein	1580.62	1.72895	3.31487
B7H15_02865	protein arginine kinase	2775.06	1.45303	2.73783
B7H15_02870	ATP-dependent Clp protease ATP-binding subunit	9030.69	1.11331	2.16342
B7H15_02950	50S ribosomal protein L10	1850.46	1.56552	2.95984
B7H15_02955	50S ribosomal protein L7/L12	1413.59	1.13785	2.20053
B7H15_03000	amidohydrolase	1037.48	2.65689	6.3067
B7H15_03010	protein deglycase HchA	15095.4	1.89931	3.73034
B7H15_03055	Cof-type HAD-IIB family hydrolase	1978.63	1.09609	2.13774
B7H15_03115	3-hexulose-6-phosphate synthase	6018.31	2.72954	6.63246
B7H15_03120	6-phospho-3-hexuloisomerase	6109.61	2.84399	7.18002
B7H15_03125	HAD family hydrolase	90.7704	1.51952	2.86695
B7H15_03135	hypothetical protein	440.723	4.17098	18.0132
B7H15_03160	protein VraX	706.734	1.66417	3.16931
B7H15_03185	APC family permease	4183.81	1.17745	2.26176
B7H15_03245	Rrf2 family transcriptional regulator	26.4814	1.16466	2.2418
B7H15_03335	aldo/keto reductase	851.245	2.06981	4.19831
B7H15_03425	alpha/beta hydrolase	1586.37	1.11858	2.17133
B7H15_03660	membrane protein	2352.52	1.15273	2.22335
B7H15_03665	alpha/beta hydrolase	374.571	2.12522	4.36268
B7H15_03670	hypothetical protein	34.0196	1.89962	3.73114
B7H15_03785	GNAT family N-acetyltransferase	77.03	2.22291	4.66834
B7H15_03790	hypothetical protein	184.484	1.00469	2.00651
B7H15_03820	undecaprenyl-diphosphate phosphatase	1217.51	1.67621	3.19588
B7H15_03865	hypothetical protein	377.594	2.16729	4.49177
B7H15_03870	DUF1361 domain-containing protein	504.398	2.22293	4.66842
B7H15_03895	DeoR/GlpR family DNA-binding transcription regulator	1014.13	3.77642	13.703
B7H15_03990	allophanate hydrolase subunit 1	405.041	1.16701	2.24546
B7H15_04020	ABC transporter permease/substrate-binding protein	2350.67	1.04371	2.06153
B7H15_04025	histidinol-phosphate transaminase	233.477	2.18607	4.55064
B7H15_04035	5\\'-3\\'-deoxyribonucleotidase	446.712	1.61609	3.06543
B7H15_04040	hypothetical protein	82.651	1.23776	2.35832
B7H15_04155	bacillithiol system redox-active protein YtxJ	849.741	1.61116	3.05498
B7H15_04185	undecaprenyl/decaprenyl-phosphate alpha-N-acetylglucosaminyl 1-phosphate transferase	638.708	1.01179	2.01641
B7H15_04215	preprotein translocase subunit SecA	5733.09	1.05156	2.07276
B7H15_04220	hypothetical protein	16.7757	2.44192	5.43363
B7H15_04225	peptide chain release factor 2	937.084	1.80439	3.49282
B7H15_04230	hypothetical protein	5.34611	3.34994	10.1961
B7H15_04235	CHAP domain-containing protein	77.5907	1.33933	2.53035
B7H15_04240	HD domain-containing protein	489.422	2.16617	4.48832
B7H15_04245	CsbA family protein	171.377	1.57664	2.98275
B7H15_04335	hypothetical protein	6.78576	1.66024	3.16069
B7H15_04340	sugar-binding transcriptional regulator	8625.14	1.51344	2.85489
B7H15_04345	type I glyceraldehyde-3-phosphate dehydrogenase	16972.2	2.04673	4.13169
B7H15_04355	triose-phosphate isomerase	6085.69	1.67144	3.18533
B7H15_04360	2,3-bisphosphoglycerate-independent phosphoglycerate mutase	9358	1.53792	2.90376
B7H15_04425	hypothetical protein	96.768	1.43539	2.70456
B7H15_04430	N-acetyltransferase	161.889	1.59052	3.01159
B7H15_04515	organic hydroperoxide resistance protein	3422.77	2.91095	7.52111
B7H15_04520	type I 3-dehydroquinate dehydratase	159.607	1.12365	2.17898
B7H15_04610	helix-turn-helix domain-containing protein	64.155	2.37325	5.18105
B7H15_04615	helix-turn-helix domain-containing protein	432.166	2.67321	6.37846
B7H15_04620	hypothetical protein	204.22	2.8568	7.24409
B7H15_04625	hypothetical protein	169.292	2.61049	6.10711
B7H15_04630	hypothetical protein	321.823	2.71658	6.57315
B7H15_04635	DUF1474 family protein	130.113	2.68398	6.42624
B7H15_04640	primase	1217.76	2.07311	4.20792
B7H15_04645	hypothetical protein	117.201	1.91485	3.77075
B7H15_04650	hypothetical protein	129.787	2.36076	5.1364
B7H15_04655	hypothetical protein	78.3574	1.66988	3.18189
B7H15_04660	phage capsid protein	855.233	1.78712	3.45126
B7H15_04665	hypothetical protein	163.736	1.94601	3.85308
B7H15_04670	terminase	10.9179	1.4952	2.81903
B7H15_04675	terminase small subunit	68.7554	1.96833	3.91314
B7H15_04780	DUF3055 domain-containing protein	179.337	1.85727	3.62321
B7H15_04800	hypothetical protein	7.80641	1.86849	3.65151
B7H15_04845	YuzB family protein	453.337	1.28768	2.44134
B7H15_04930	NADH-dependent flavin oxidoreductase	2167.99	3.25725	9.56158
B7H15_04970	glucose-6-phosphate isomerase	5892.75	1.0645	2.09145
B7H15_05005	YisL family protein	406.509	1.06346	2.08994
B7H15_05030	ATP-dependent chaperone ClpB	2528.64	2.35966	5.1325
B7H15_05070	ketoacyl-ACP synthase III	942.87	1.21012	2.31356
B7H15_05110	ABC transporter substrate-binding protein	17.6311	1.1713	2.25214
B7H15_05115	ABC transporter ATP-binding protein	12.9779	1.49701	2.82258
B7H15_05145	adaptor protein MecA	4064.22	1.16391	2.24063
B7H15_05185	GTP pyrophosphokinase family protein	779.149	1.13551	2.19697
B7H15_05190	NAD kinase	1606.39	1.07388	2.10509
B7H15_05195	RluA family pseudouridine synthase	811.385	1.25357	2.3843
B7H15_05200	magnesium transporter	884.31	1.40532	2.64877
B7H15_05205	monovalent cation:proton antiporter family protein	1546.99	1.13901	2.2023
B7H15_05210	enoyl-ACP reductase FabI	1992.8	1.01335	2.01859
B7H15_05245	UDP-N-acetylmuramoyl-L-alanyl-D-glutamate--L-lysine ligase	1214.57	1.16334	2.23976
B7H15_05250	YueH family protein	134.262	1.23847	2.35948
B7H15_05255	peptide chain release factor 3	1828.43	1.47345	2.77684
B7H15_05260	TerC family protein	412.277	1.76317	3.39442
B7H15_05305	YkvS family protein	304.547	1.12545	2.1817
B7H15_05310	CPBP family intramembrane metalloprotease	2026.53	1.03786	2.05318
B7H15_05360	DoxX family protein	167.36	1.81604	3.52114
B7H15_05455	GNAT family N-acetyltransferase	111.679	1.57157	2.97228
B7H15_05630	cytochrome ubiquinol oxidase subunit I	308.205	2.15291	4.44724
B7H15_05665	peptide deformylase	670.185	1.04714	2.06643
B7H15_05670	YkyA family protein	1685.67	1.63343	3.10249
B7H15_05815	glycerophosphodiester phosphodiesterase	765.872	1.28896	2.44353
B7H15_05825	hypothetical protein	353.544	1.02793	2.03909
B7H15_05830	16S rRNA (guanine(966)-N(2))-methyltransferase RsmD	442.482	1.10427	2.1499
B7H15_05835	pantetheine-phosphate adenylyltransferase	469.344	1.25347	2.38413
B7H15_05845	DUF177 domain-containing protein	2113.13	1.15773	2.23107
B7H15_05850	hypothetical protein	706.276	1.35359	2.55548
B7H15_05955	hypothetical protein	67.6259	1.61606	3.06536
B7H15_05985	XTP/dITP diphosphatase	1502.91	1.02882	2.04036
B7H15_06130	YjjG family noncanonical pyrimidine nucleotidase	777.827	1.28716	2.44048
B7H15_06140	bacillithiol biosynthesis cysteine-adding enzyme BshC	1400.08	1.81158	3.51026
B7H15_06160	penicillin-binding protein	2201.27	1.11741	2.16957
B7H15_06190	peptidoglycan editing factor PgeF	791.154	1.08924	2.12762
B7H15_06450	30S ribosomal protein S16	670.341	1.04726	2.0666
B7H15_06460	tRNA (guanosine(37)-N1)-methyltransferase TrmD	341.206	1.06727	2.09547
B7H15_06510	type I DNA topoisomerase	4266.87	3.0488	8.27522
B7H15_06515	methylenetetrahydrofolate--tRNA-(uracil(54)-C(5))-methyltransferase (FADH(2)-oxidizing) TrmFO	3357.67	2.96306	7.79779
B7H15_06580	RIP metalloprotease RseP	1273.16	1.57636	2.98217
B7H15_06585	proline--tRNA ligase	2390.39	1.55563	2.93962
B7H15_06700	CinA family nicotinamide mononucleotide deamidase-related protein	1161.91	1.21622	2.32338
B7H15_06705	recombinase RecA	4404.3	1.22187	2.33249
B7H15_06735	MTH1187 family thiamine-binding protein	116.296	1.0217	2.03031
B7H15_06740	tRNA (N6-isopentenyl adenosine(37)-C2)-methylthiotransferase MiaB	2186.58	1.14961	2.21854
B7H15_06745	RicAFT regulatory complex protein RicA family protein	809.792	1.08198	2.11694
B7H15_06750	energy coupling factor transporter S component ThiW	868.277	1.05316	2.07507
B7H15_06755	DNA mismatch repair protein MutS	1578.26	1.11447	2.16516
B7H15_06805	GTPase HflX	527.419	1.9	3.73214
B7H15_06810	aminotransferase class I/II-fold pyridoxal phosphate-dependent enzyme	599.654	2.17471	4.51496
B7H15_06960	thermonuclease family protein	64.5123	1.08873	2.12687
B7H15_07030	GMP reductase	315.011	1.0594	2.08406
B7H15_07035	hypothetical protein	11.843	2.33449	5.04372
B7H15_07050	hypothetical protein	219.523	4.68341	25.6949
B7H15_07055	DUF896 domain-containing protein	166.49	2.77685	6.85352
B7H15_07060	transketolase	13886.2	1.60705	3.04628
B7H15_07080	exonuclease SbcCD subunit D	213.822	1.03216	2.04509
B7H15_07135	DNA topoisomerase IV subunit B	1570.74	1.22797	2.34237
B7H15_07140	DNA topoisomerase IV subunit A	2318.85	1.43742	2.70836
B7H15_07145	hypothetical protein	124.416	1.27039	2.41226
B7H15_07150	alanine:cation symporter family protein	1424.43	1.1655	2.24312
B7H15_07190	Y-family DNA polymerase	631.664	2.31055	4.96071
B7H15_07235	tryptophan synthase subunit alpha	58.7884	1.28644	2.43926
B7H15_07265	ABC transporter ATP-binding protein	301.798	1.08118	2.11577
B7H15_07270	ABC transporter permease	268.627	1.46269	2.75623
B7H15_07330	ATP-binding cassette domain-containing protein	1817.47	2.22481	4.67449
B7H15_07335	hypothetical protein	393.683	2.38739	5.23209
B7H15_07425	nitric oxide reductase activation protein NorD	771.247	2.02423	4.06775
B7H15_07430	MoxR family ATPase	310.491	1.83967	3.57929
B7H15_07480	phosphatase PAP2 family protein	1132.16	1.88824	3.70182
B7H15_07485	undecaprenyldiphospho-muramoylpentapeptide beta-N-acetylglucosaminyltransferase	1237.26	2.59586	6.04551
B7H15_07490	GNAT family N-acetyltransferase	392.886	2.57051	5.9402
B7H15_07500	hypothetical protein	1296.94	1.07514	2.10693
B7H15_07505	PTS glucose transporter subunit IIA	2347.87	1.08603	2.12288
B7H15_07510	peptide-methionine (R)-S-oxide reductase MsrB	1618.57	1.00101	2.0014
B7H15_07655	hypothetical protein	420.606	1.31173	2.48239
B7H15_07660	endonuclease III	707.568	1.11272	2.16253
B7H15_07670	B7H15_07670	3320.93	1.07172	2.10194
B7H15_07705	DUF1405 domain-containing protein	298.725	1.33913	2.52999
B7H15_07710	YpiB family protein	396.761	1.21902	2.32788
B7H15_07730	chorismate synthase	630.062	1.07999	2.11402
B7H15_07795	hypothetical protein	59.859	1.08835	2.12631
B7H15_07805	asparaginase	832.028	2.31514	4.97652
B7H15_07810	YpdA family putative bacillithiol disulfide reductase	975.074	1.37259	2.58936
B7H15_07980	phage major capsid protein	20.4988	1.25769	2.39113
B7H15_07985	Clp protease ClpP	15.8709	1.15287	2.22356
B7H15_08050	hypothetical protein	40.9136	2.86489	7.2848
B7H15_08055	hypothetical protein	12.429	1.04779	2.06736
B7H15_08060	hypothetical protein	4.78121	2.54261	5.82642
B7H15_08110	DUF2815 family protein	6.5059	1.9644	3.90251
B7H15_08115	DUF2800 domain-containing protein	7.76881	2.16558	4.48648
B7H15_08120	hypothetical protein	1.85755	2.97	7.83534
B7H15_08140	DUF1270 domain-containing protein	7.80544	3.59256	12.0633
B7H15_08155	hypothetical protein	645.601	1.18151	2.26815
B7H15_08240	DUF309 domain-containing protein	142.496	1.47315	2.77627
B7H15_08260	aldo/keto reductase	2378.92	1.16386	2.24057
B7H15_08305	hypothetical protein	176.192	1.04285	2.06029
B7H15_08310	VOC family protein	995.572	1.05903	2.08353
B7H15_08330	aromatic acid exporter family protein	1597.79	1.44725	2.72688
B7H15_08335	BrxA/BrxB family bacilliredoxin	701.642	1.69135	3.22959
B7H15_08375	exodeoxyribonuclease VII small subunit	510.694	1.07747	2.11034
B7H15_08395	acetyl-CoA carboxylase biotin carboxylase subunit	2554.87	1.01171	2.0163
B7H15_08400	acetyl-CoA carboxylase biotin carboxyl carrier protein	1023.02	1.04505	2.06343
B7H15_08420	membrane protein	293.45	1.02817	2.03944
B7H15_08490	MBL fold metallo-hydrolase	1781.6	1.11982	2.1732
B7H15_08495	MTH1187 family thiamine-binding protein	653.56	1.07646	2.10885
B7H15_08530	superoxide dismutase	26318.9	1.11125	2.16032
B7H15_08550	deoxyribonuclease IV	1035.3	1.2422	2.3656
B7H15_08555	DEAD/DEAH box helicase	1245.2	1.44233	2.7176
B7H15_08560	Nif3-like dinuclear metal center hexameric protein	1178.29	1.47194	2.77395
B7H15_08565	tRNA (adenine(22)-N(1))-methyltransferase TrmK	418.251	1.8027	3.48873
B7H15_08590	glycine--tRNA ligase	4547.66	1.57141	2.97195
B7H15_08605	cytidine deaminase	799.905	1.00484	2.00672
B7H15_08645	tRNA (N(6)-L-threonylcarbamoyladenosine(37)-C(2))-methylthiotransferase MtaB	1761.37	1.38612	2.61374
B7H15_08655	50S ribosomal protein L11 methyltransferase	1411.09	2.04615	4.13001
B7H15_08660	molecular chaperone DnaJ	1439.41	2.0121	4.03369
B7H15_08665	molecular chaperone DnaK	7787.75	1.33735	2.52688
B7H15_08670	nucleotide exchange factor GrpE	1562.45	1.71924	3.29264
B7H15_08675	heat-inducible transcriptional repressor HrcA	2400.36	1.51056	2.84921
B7H15_08715	ComEA family DNA-binding protein	121.042	2.0135	4.03759
B7H15_08720	class I SAM-dependent methyltransferase	1451.94	1.238	2.35872
B7H15_08725	ribosome silencing factor	500.882	1.20666	2.30803
B7H15_08730	bis(5\\'-nucleosyl)-tetraphosphatase (symmetrical) YqeK	1106.98	1.38819	2.6175
B7H15_08735	nicotinate (nicotinamide) nucleotide adenylyltransferase	710.904	1.28514	2.43705
B7H15_08740	ribosome assembly RNA-binding protein YhbY	355.501	1.16451	2.24158
B7H15_08745	shikimate dehydrogenase	718.135	1.2957	2.45496
B7H15_08750	ribosome biogenesis GTPase YqeH	950.536	1.3604	2.56756
B7H15_08755	YqeG family HAD IIIA-type phosphatase	496.355	1.3127	2.48407
B7H15_08760	5\\'-methylthioadenosine/S-adenosylhomocysteine nucleosidase	492.652	1.27455	2.41923
B7H15_08810	transcription elongation factor GreA	1277.36	1.24032	2.36251
B7H15_08850	alanine--tRNA ligase	1612.52	1.36043	2.56761
B7H15_08865	hypothetical protein	28.4298	1.70243	3.25449
B7H15_08870	tRNA 2-thiouridine(34) synthase MnmA	2246.06	1.29574	2.45504
B7H15_08875	cysteine desulfurase	1726.99	1.41694	2.67019
B7H15_08880	LLM class flavin-dependent oxidoreductase	1001.63	1.50206	2.83247
B7H15_08930	N-acetylmuramoyl-L-alanine amidase	1650.29	1.13631	2.19818
B7H15_08950	single-stranded-DNA-specific exonuclease RecJ	776.402	1.10646	2.15316
B7H15_09020	hypothetical protein	242.637	2.07969	4.22716
B7H15_09025	DUF4930 family protein	216.268	2.32571	5.01311
B7H15_09080	glutamate-1-semialdehyde 2,1-aminomutase	2018.41	1.04899	2.06908
B7H15_09090	uroporphyrinogen-III synthase	316.727	1.6886	3.22344
B7H15_09095	hydroxymethylbilane synthase	1059.68	1.23267	2.35001
B7H15_09100	cytochrome c biogenesis protein	1512.68	1.4181	2.67233
B7H15_09110	B7H15_09110	315.062	1.38793	2.61703
B7H15_09115	ATP-dependent Clp protease ATP-binding subunit ClpX	7590.93	2.27533	4.84107
B7H15_09120	trigger factor	7019.24	1.05642	2.07976
B7H15_09125	hypothetical protein	84.0457	1.08303	2.11848
B7H15_09175	primosomal protein DnaI	3179.47	1.31403	2.48635
B7H15_09180	replication initiation and membrane attachment family protein	4060.7	1.40966	2.65675
B7H15_09185	transcriptional regulator NrdR	1413.56	1.17122	2.25202
B7H15_09200	bifunctional DNA-formamidopyrimidine glycosylase/DNA-(apurinic or apyrimidinic site) lyase	1348.46	1.07635	2.10869
B7H15_09260	acetyl-CoA carboxylase carboxyltransferase subunit alpha	1422.49	1.38321	2.60848
B7H15_09265	acetyl-CoA carboxylase, carboxyltransferase subunit beta	1374.45	1.09113	2.1304
B7H15_09335	TSUP family transporter	174.358	1.37855	2.60006
B7H15_09340	tRNA 4-thiouridine(8) synthase ThiI	330.656	2.23783	4.71686
B7H15_09345	cysteine desulfurase	224.308	1.98346	3.95441
B7H15_09360	GAF domain-containing protein	370.108	1.60272	3.03716
B7H15_09365	30S ribosomal protein S4	3427.79	1.12631	2.183
B7H15_09370	hypothetical protein	140.056	1.08649	2.12356
B7H15_09375	glycerophosphoryl diester phosphodiesterase	414.606	1.30403	2.46918
B7H15_09385	alanine--glyoxylate aminotransferase family protein	519.971	1.22414	2.33616
B7H15_09400	HAD family hydrolase	1010.14	1.23742	2.35777
B7H15_09565	rRNA pseudouridine synthase	1380	2.22763	4.68364
B7H15_09570	polysaccharide biosynthesis protein	1496.52	1.52265	2.87318
B7H15_09585	rhodanese-like domain-containing protein	329.176	1.30357	2.46839
B7H15_09590	leucine--tRNA ligase	1748.01	1.21775	2.32584
B7H15_09600	TIGR01212 family radical SAM protein	971.321	2.72857	6.62797
B7H15_09605	class I SAM-dependent methyltransferase	600.863	2.57914	5.97583
B7H15_09615	IS5/IS1182 family transposase	14.7098	1.52372	2.87531
B7H15_09665	metalloregulator ArsR/SmtB family transcription factor	66.464	1.30868	2.47714
B7H15_09670	arsenite efflux transporter membrane subunit ArsB	203.925	1.06328	2.08968
B7H15_09675	arsenate reductase (thioredoxin)	86.4546	1.05982	2.08467
B7H15_09690	RNA polymerase sigma factor SigS	124.86	1.9919	3.9776
B7H15_09695	competence protein ComK	274.889	1.34176	2.5346
B7H15_09700	hypothetical protein	222.452	1.22749	2.34159
B7H15_09720	fluoride efflux transporter CrcB	59.0158	2.43893	5.42238
B7H15_09725	CrcB family protein	64.5651	1.70519	3.26073
B7H15_09845	hypothetical protein	8.60442	1.79297	3.46528
B7H15_09850	hypothetical protein	3.8956	2.15621	4.45742
B7H15_10100	foldase	2614.43	1.2876	2.44121
B7H15_10120	hypothetical protein	2.58269	2.16697	4.4908
B7H15_10125	hypothetical protein	6.77952	2.04554	4.12828
B7H15_10135	DUF445 domain-containing protein	591.612	1.74955	3.36255
B7H15_10140	helix-turn-helix transcriptional regulator	523.848	1.00521	2.00723
B7H15_10380	thioredoxin-dependent thiol peroxidase	833.641	1.08247	2.11767
B7H15_10395	hypothetical protein	30.6493	3.46224	11.0214
B7H15_10400	SAV1866 family putative multidrug efflux ABC transporter	712.152	2.39371	5.25507
B7H15_10445	monofunctional peptidoglycan glycosyltransferase SgtB	1035.85	1.05435	2.07678
B7H15_10450	type 1 glutamine amidotransferase	8659.2	1.76068	3.38858
B7H15_10465	acyl-CoA thioesterase	1286.05	1.22905	2.34413
B7H15_10470	aminopeptidase	1930.53	1.23252	2.34977
B7H15_10480	low molecular weight phosphotyrosine protein phosphatase	1765.66	1.0963	2.13805
B7H15_10530	hypothetical protein	46.3495	1.6329	3.10136
B7H15_10540	type 1 glutamine amidotransferase	1016.13	2.06328	4.17935
B7H15_10545	lipid II isoglutaminyl synthase subunit MurT	1228.51	1.38932	2.61955
B7H15_10560	3\\'-5\\' exonuclease	546.526	1.45257	2.73695
B7H15_10620	B7H15_10620	1970.76	1.49907	2.8266
B7H15_10625	DNA helicase PcrA	1660.5	1.67756	3.19886
B7H15_10630	heptaprenylglyceryl phosphate synthase	339.97	1.17976	2.26539
B7H15_10705	cysteine hydrolase	1666.34	1.1937	2.28739
B7H15_10730	YolD-like family protein	207.22	1.21134	2.31553
B7H15_10860	amidase	138.744	2.09762	4.28002
B7H15_10870	staphylokinase	756.379	2.67457	6.38446
B7H15_10875	CHAP domain-containing protein	320.564	3.30583	9.88904
B7H15_10880	phage holin	148.9	2.73477	6.65654
B7H15_10895	DUF2951 domain-containing protein	166.881	3.81482	14.0727
B7H15_10900	hypothetical protein	217.201	3.54554	11.6765
B7H15_10905	hypothetical protein	54.5607	3.59347	12.071
B7H15_10910	hypothetical protein	1385.76	2.06032	4.17078
B7H15_10915	phage tail family protein	381.675	2.0571	4.16148
B7H15_10920	phage tail tape measure protein	1062.93	1.86729	3.64848
B7H15_10925	hypothetical protein	182.401	1.82397	3.54055
B7H15_10930	Ig-like domain-containing protein	110.299	1.874	3.66548
B7H15_10935	phage tail protein	84.4299	1.54002	2.90798
B7H15_10940	hypothetical protein	207.265	1.97015	3.91809
B7H15_10945	HK97 gp10 family phage protein	264.474	2.1284	4.37233
B7H15_10950	head-tail adaptor protein	99.5379	1.83477	3.56715
B7H15_10955	phage head-tail adapter protein	67.4419	1.7152	3.28342
B7H15_10960	hypothetical protein	140.345	2.23333	4.70219
B7H15_10965	phage major capsid protein	817.832	2.39118	5.24588
B7H15_10970	Clp protease ClpP	477.999	2.80557	6.99137
B7H15_10975	phage portal protein	572.015	3.05323	8.30067
B7H15_10980	terminase large subunit	768.529	3.77762	13.7144
B7H15_10985	hypothetical protein	117.949	3.4506	10.9329
B7H15_10990	HNH endonuclease	165.05	3.62632	12.349
B7H15_10995	hypothetical protein	2167.91	4.26907	19.2805
B7H15_11000	DUF1514 family protein	206.871	3.68601	12.8706
B7H15_11005	transcriptional activator RinB	712.322	4.08223	16.9385
B7H15_11010	hypothetical protein	2562.52	4.36855	20.6568
B7H15_11015	DUF1381 domain-containing protein	439.697	3.67636	12.7848
B7H15_11020	hypothetical protein	490.467	4.10697	17.2314
B7H15_11025	dUTP pyrophosphatase	1234.18	3.99434	15.9374
B7H15_11030	hypothetical protein	251.171	3.52497	11.5112
B7H15_11035	DUF1024 family protein	77.6871	3.18702	9.10728
B7H15_11040	hypothetical protein	117.337	3.40266	10.5755
B7H15_11045	phi PVL orf 51-like protein	649.777	3.74881	13.4433
B7H15_11050	hypothetical protein	411.981	3.6837	12.8501
B7H15_11055	RusA family crossover junction endodeoxyribonuclease	782.385	4.0611	16.6922
B7H15_11060	hypothetical protein	838.079	4.32611	20.058
B7H15_11065	DnaD domain-containing protein	2685.5	4.3391	20.2394
B7H15_11070	single-stranded DNA-binding protein	1943.43	4.31247	19.8693
B7H15_11075	MBL fold metallo-hydrolase	2624.25	4.44036	21.7112
B7H15_11080	recombinase RecT	4226.83	4.26527	19.2298
B7H15_11085	AAA family ATPase	7031.88	4.14073	17.6394
B7H15_11090	hypothetical protein	1351.15	4.38062	20.8304
B7H15_11095	DUF1108 family protein	1148.24	4.07083	16.8051
B7H15_11100	DUF2482 family protein	883.507	4.37082	20.6894
B7H15_11105	DUF1270 domain-containing protein	201.596	5.00626	32.1391
B7H15_11110	DUF771 domain-containing protein	2794.66	4.81445	28.1381
B7H15_11115	hypothetical protein	2451.91	1.7457	3.35358
B7H15_11120	phage antirepressor KilAC domain-containing protein	7052.48	4.46837	22.1368
B7H15_11125	hypothetical protein	3703.56	4.80478	27.9501
B7H15_11130	DUF2829 domain-containing protein	2916.89	4.51474	22.8598
B7H15_11135	helix-turn-helix domain-containing protein	2144.02	5.04084	32.9188
B7H15_11140	transcriptional regulator	11.1283	4.41929	21.3963
B7H15_11170	site-specific integrase	483.915	2.65161	6.28368
B7H15_11190	ArgE/DapE family deacylase	2606.18	1.37061	2.58579
B7H15_11230	terminase small subunit	20.3411	1.44798	2.72825
B7H15_11235	hypothetical protein	8.16176	1.85262	3.61155
B7H15_11240	site-specific integrase	10.1572	1.8424	3.58607
B7H15_11245	chaperonin GroEL	5299.68	1.34162	2.53435
B7H15_11250	co-chaperone GroES	708.806	1.54908	2.92631
B7H15_11265	nitroreductase family protein	738.276	1.42806	2.69085
B7H15_11395	ACT domain-containing protein	34.3786	1.33982	2.53121
B7H15_11455	hypothetical protein	19.6023	2.36887	5.16538
B7H15_11460	SprT family protein	444.036	2.15851	4.46454
B7H15_11465	RNA-binding transcriptional accessory protein	1399.65	1.8153	3.51932
B7H15_11505	alanine racemase	1986.28	1.41092	2.65906
B7H15_11510	holo-ACP synthase	617.634	1.42567	2.6864
B7H15_11515	PH domain-containing protein	523.112	1.25596	2.38826
B7H15_11520	PH domain-containing protein	1547.99	1.20211	2.30076
B7H15_11560	DEAD/DEAH box helicase	3399.38	1.6728	3.18833
B7H15_11565	UDP-N-acetylmuramoyl-tripeptide--D-alanyl-D-alanine ligase	2857.42	1.81016	3.50682
B7H15_11570	D-alanine--D-alanine ligase	1630.37	1.40831	2.65426
B7H15_11585	heavy-metal-associated domain-containing protein	128.742	2.24847	4.75179
B7H15_11590	copper-sensing transcriptional repressor CsoR	96.6699	1.61288	3.05862
B7H15_11645	lytic transglycosylase SceD	8332.74	9.0144	517.136
B7H15_11660	3-hydroxyacyl-ACP dehydratase FabZ	1722.04	1.1039	2.14936
B7H15_11785	aldehyde dehydrogenase family protein	11298	1.23001	2.34568
B7H15_11805	DUF2529 domain-containing protein	411.12	1.50954	2.84719
B7H15_11810	CTP synthase	1445.05	1.37973	2.6022
B7H15_11835	hypothetical protein	633.748	1.32193	2.5
B7H15_11840	M20 family metallopeptidase	459.717	1.27286	2.4164
B7H15_11880	thiol-disulfide oxidoreductase DCC family protein	495.064	1.09308	2.13329
B7H15_11900	SDR family oxidoreductase	2097.88	1.28301	2.43346
B7H15_11960	BglG family transcription antiterminator	1606.22	1.87075	3.65723
B7H15_11965	PTS sugar transporter subunit IIA	1047.22	2.22627	4.67923
B7H15_11970	mannitol-1-phosphate 5-dehydrogenase	1758.57	1.6386	3.11364
B7H15_12100	YjiH family protein	213.688	1.32986	2.51379
B7H15_12170	zinc-binding alcohol dehydrogenase family protein	807.714	1.65014	3.13864
B7H15_12175	NADP-dependent oxidoreductase	2949.47	1.44976	2.73162
B7H15_12180	alpha/beta hydrolase	555.076	1.36078	2.56825
B7H15_12225	hypothetical protein	48.6403	2.42831	5.38264
B7H15_12230	hypothetical protein	22.8925	2.11001	4.31694
B7H15_12235	hypothetical protein	8.14871	4.02845	16.3186
B7H15_12240	aldo/keto reductase	931.096	1.57667	2.9828
B7H15_12245	MerR family transcriptional regulator	147.113	1.326	2.50706
B7H15_12275	acetolactate decarboxylase	1429.4	5.1932	36.5854
B7H15_12280	acetolactate synthase AlsS	3838.26	4.83515	28.5446
B7H15_12330	tRNA pseudouridine(38-40) synthase TruA	447.553	1.30033	2.46285
B7H15_12335	energy-coupling factor transporter transmembrane protein EcfT	416.532	1.15573	2.22796
B7H15_12340	energy-coupling factor transporter ATPase	559.402	1.05413	2.07646
B7H15_12345	energy-coupling factor transporter ATPase	363.38	1.00737	2.01025
B7H15_12410	50S ribosomal protein L6	2085.32	1.00485	2.00673
B7H15_12415	30S ribosomal protein S8	1845.27	1.19313	2.28649
B7H15_12420	B7H15_12420	736.326	1.11592	2.16733
B7H15_12425	50S ribosomal protein L5	2428.51	1.25969	2.39445
B7H15_12430	50S ribosomal protein L24	1723.05	1.37593	2.59536
B7H15_12435	50S ribosomal protein L14	1830.09	1.26477	2.4029
B7H15_12440	30S ribosomal protein S17	1145.72	1.20408	2.3039
B7H15_12445	50S ribosomal protein L29	701.911	1.32013	2.49688
B7H15_12450	50S ribosomal protein L16	2105.94	1.29933	2.46114
B7H15_12455	30S ribosomal protein S3	2776.75	1.21654	2.32388
B7H15_12460	50S ribosomal protein L22	1467.12	1.11213	2.16165
B7H15_12465	30S ribosomal protein S19	898.185	1.05193	2.0733
B7H15_12470	50S ribosomal protein L2	4801.03	1.2379	2.35854
B7H15_12475	50S ribosomal protein L23	1267.27	1.22174	2.33229
B7H15_12480	50S ribosomal protein L4	2870.52	1.0446	2.06279
B7H15_12485	50S ribosomal protein L3	3254.71	1.14902	2.21764
B7H15_12520	glucose uptake protein GlcU	750.381	2.30254	4.93326
B7H15_12525	hypothetical protein	169.675	1.69414	3.23585
B7H15_12530	AEC family transporter	297.344	1.84184	3.58468
B7H15_12550	lipid II:glycine glycyltransferase	1880.8	1.47319	2.77636
B7H15_12555	hypothetical protein	243.32	1.41554	2.6676
B7H15_12560	VOC family protein	530.002	1.25647	2.38911
B7H15_12580	hypothetical protein	29.1997	2.30895	4.95523
B7H15_12585	nitrogen fixation protein NifR	24.418	2.298	4.91775
B7H15_12595	GTP 3\\',8-cyclase MoaA	1346.88	1.56888	2.96675
B7H15_12600	molybdenum cofactor guanylyltransferase MobA	601.392	1.5087	2.84554
B7H15_12605	molybdopterin converting factor subunit 1	134.441	1.45209	2.73603
B7H15_12610	molybdenum cofactor biosynthesis protein MoaE	430.269	1.21489	2.32123
B7H15_12655	formate dehydrogenase accessory sulfurtransferase FdhD	1174.77	1.02947	2.04127
B7H15_12775	CHAP domain-containing protein	7461.08	2.38021	5.20614
B7H15_12790	FAD-dependent monooxygenase	561.01	1.58586	3.00186
B7H15_12900	Na+/H+ antiporter NhaC family protein	497.802	1.48802	2.80503
B7H15_12905	hypothetical protein	216.342	1.11001	2.15847
B7H15_12910	SDR family oxidoreductase	3982.23	1.06086	2.08617
B7H15_13005	type 2 isopentenyl-diphosphate Delta-isomerase	1061.3	1.06153	2.08714
B7H15_13090	ABC transporter ATP-binding protein	23.1021	2.04386	4.12348
B7H15_13095	ABC transporter permease	25.045	2.07725	4.22001
B7H15_13105	heme sensor histidine kinase HssS	594.005	1.17084	2.25142
B7H15_13145	oxidoreductase	824.492	1.87277	3.66234
B7H15_13175	YhgE/Pip domain-containing protein	55.7084	1.26719	2.40693
B7H15_13185	magnesium transporter CorA family protein	1318.03	1.83957	3.57903
B7H15_13205	pyridoxamine 5\\'-phosphate oxidase family protein	4642.8	1.32115	2.49865
B7H15_13230	Hsp20/alpha crystallin family protein	1322.67	1.81837	3.52684
B7H15_13310	GNAT family N-acetyltransferase	95.4253	2.35739	5.12444
B7H15_13320	hypothetical protein	46.5319	1.95719	3.88304
B7H15_13325	SRPBCC domain-containing protein	120.099	2.4943	5.63456
B7H15_13340	type II toxin-antitoxin system Phd/YefM family antitoxin	441.542	1.11569	2.16698
B7H15_13365	amino acid ABC transporter ATP-binding protein	7555.54	1.35061	2.5502
B7H15_13370	amino acid ABC transporter permease	6422.87	1.13896	2.20222
B7H15_13375	transporter substrate-binding domain-containing protein	4300.62	1.24057	2.36292
B7H15_13400	cation diffusion facilitator family transporter	431.597	1.2207	2.3306
B7H15_13465	dethiobiotin synthase	5.6522	1.80957	3.50538
B7H15_13570	NAD(P)-dependent oxidoreductase	920.236	2.5801	5.9798
B7H15_13575	hypothetical protein	50.7124	1.26659	2.40593
B7H15_13580	2-dehydropantoate 2-reductase	372.073	1.48751	2.80405
B7H15_13585	MFS transporter	1416.28	2.15578	4.45609
B7H15_13665	Txe/YoeB family addiction module toxin	752.576	2.42638	5.37542
B7H15_13670	type II toxin-antitoxin system Phd/YefM family antitoxin	461.865	2.0325	4.09112
B7H15_13740	hypothetical protein	783.724	1.33922	2.53015
B7H15_13745	short-chain dehydrogenase	1416.67	1.57044	2.96995
B7H15_13805	hypothetical protein	23.2673	1.39129	2.62312
B7H15_13945	DUF2188 domain-containing protein	2154.89	1.93381	3.82063
B7H15_14015	MarR family transcriptional regulator	94.3995	1.01417	2.01974
B7H15_14020	N-acetyltransferase	373.775	2.16728	4.49177
B7H15_14025	VOC family protein	1331.77	2.05209	4.14705
B7H15_14030	NAD(P)H-dependent oxidoreductase	2978.2	1.34126	2.53373
B7H15_14105	thioredoxin family protein	452.384	1.04975	2.07018
B7H15_14115	glucose-specific PTS transporter subunit IIBC	469.257	1.07654	2.10897
B7H15_14130	holin-like murein hydrolase modulator CidA	581.528	4.84175	28.6756
B7H15_14145	CHAP domain-containing protein	425.466	1.53649	2.90088
B7H15_14200	fatty acid efflux MMPL transporter FarE	91.1429	1.88215	3.68625
B7H15_14225	cell wall inhibition responsive protein CwrA	157.128	4.16883	17.9863
B7H15_14290	lytic transglycosylase IsaA	19343.8	1.07524	2.10707
B7H15_14320	VOC family protein	82.949	1.58329	2.99652
B7H15_14325	NmrA/HSCARG family protein	119.378	1.75647	3.3787
B7H15_14330	DUF2316 family protein	31.096	2.00475	4.0132
B7H15_14405	epoxyqueuosine reductase QueH	135.246	1.32389	2.5034
B7H15_14425	CocE/NonD family hydrolase	203.736	1.57183	2.97282
B7H15_14430	aspartate 1-decarboxylase	349.758	1.72407	3.30367
B7H15_14435	pantoate--beta-alanine ligase	945.24	1.96598	3.90679
B7H15_14440	3-methyl-2-oxobutanoate hydroxymethyltransferase	655.178	1.61752	3.06846
B7H15_14455	L-lactate dehydrogenase	649.251	1.17906	2.2643
B7H15_14480	fructose bisphosphate aldolase	7147.89	1.24363	2.36794
B7H15_14495	AMP-binding protein	6345.01	1.08913	2.12746
B7H15_14505	sterile alpha motif-like domain-containing protein	71.5155	1.45658	2.74457
B7H15_14510	choline dehydrogenase	683.367	1.17977	2.26541
B7H15_14515	betaine-aldehyde dehydrogenase	1044.94	1.70996	3.27152
B7H15_14525	GbsR/MarR family transcriptional regulator	202.956	1.47282	2.77564
B7H15_14530	MBL fold metallo-hydrolase	344.821	1.59315	3.01707
B7H15_14800	flavin reductase family protein	656.31	1.87275	3.6623
B7H15_14810	GNAT family N-acetyltransferase	36.8563	1.60528	3.04254
B7H15_14875	bifunctional phosphoribosyl-AMP cyclohydrolase/phosphoribosyl-ATP diphosphatase HisIE	61.1219	1.16783	2.24674
B7H15_14950	YceI family protein	4547.33	3.24947	9.51016
B7H15_14960	rhodanese-related sulfurtransferase	2017.78	3.20614	9.22875
B7H15_14965	pyroglutamyl-peptidase I	147.647	1.60952	3.05149
B7H15_14980	bacillithiol transferase BstA	665.612	1.01046	2.01455
B7H15_15035	hypothetical protein	35.9301	1.35135	2.55151
B7H15_15075	nucleoid occlusion protein	1175.18	1.15006	2.21923
B7H15_00005	chromosomal replication initiator protein DnaA	2198.52	-2.13229	-4.38413
B7H15_00040	histidine ammonia-lyase	440.611	-2.3404	-5.06442
B7H15_00045	hypothetical protein	714.784	-1.13855	-2.20159
B7H15_00050	serine--tRNA ligase	970.067	-1.24354	-2.3678
B7H15_00135	LPXTG-anchored adenosine synthase AdsA	406.516	-2.03958	-4.11126
B7H15_00140	23S rRNA (pseudouridine(1915)-N(3))-methyltransferase RlmH	124.876	-2.4331	-5.40051
B7H15_00175	PBP2a family beta-lactam-resistant peptidoglycan transpeptidase MecA	37687.6	-1.29173	-2.44822
B7H15_00180	beta-lactam sensor/signal transducer MecR1	8791.73	-1.68187	-3.20844
B7H15_00185	DUF3387 domain-containing protein	3375.23	-1.8983	-3.72774
B7H15_00190	IS5/IS1182 family transposase	104.241	-1.79384	-3.46736
B7H15_00195	DUF1643 domain-containing protein	9.33087	-1.67997	-3.20422
B7H15_00215	recombinase family protein	186.037	-1.88953	-3.70513
B7H15_00220	DUF927 domain-containing protein	98.8467	-1.2723	-2.41546
B7H15_00255	hypothetical protein	46.5291	-1.8758	-3.67006
B7H15_00260	HNH endonuclease	60.441	-1.65545	-3.15022
B7H15_00345	arginine-ornithine antiporter	118.22	-1.05451	-2.07702
B7H15_00360	universal stress protein	4150.94	-1.45562	-2.74274
B7H15_00370	IS6 family transposase	78.9759	-1.04444	-2.06256
B7H15_00380	IS110 family transposase	381.646	-2.1916	-4.56811
B7H15_00385	class I SAM-dependent methyltransferase	71.1149	-1.99113	-3.97549
B7H15_00415	copper-translocating P-type ATPase	3240.23	-4.43277	-21.5972
B7H15_00420	YdhK family protein	877.68	-4.88018	-29.4496
B7H15_00490	tRNA-dihydrouridine synthase	511.199	-1.22087	-2.33088
B7H15_00500	TfoX/Sxy family protein	77.8137	-1.19627	-2.29146
B7H15_00505	MFS transporter	179.09	-1.48821	-2.80541
B7H15_00540	hypothetical protein	193.546	-1.05966	-2.08444
B7H15_00615	L-lactate permease	2389.27	-1.21566	-2.32248
B7H15_00630	HTH-type transcriptional regulator SarS	352.123	-2.03525	-4.09893
B7H15_00640	staphyloferrin B ABC transporter permease subunit SirB	65.1097	-1.55175	-2.93173
B7H15_00645	staphyloferrin B ABC transporter substrate-binding protein SirA	253.249	-1.8538	-3.6145
B7H15_00700	hypothetical protein	71.9404	-1.75831	-3.38301
B7H15_00720	NAD-dependent epimerase/dehydratase family protein	20.6784	-1.40494	-2.64806
B7H15_00735	O-antigen ligase family protein	27.0512	-1.34246	-2.53583
B7H15_00750	cell-wall-anchored protein SasD	730.785	-1.63694	-3.11005
B7H15_00770	deoxyribose-phosphate aldolase	705.257	-1.79648	-3.47372
B7H15_00835	hypothetical protein	153.743	-1.2142	-2.32012
B7H15_00840	hypothetical protein	77.0442	-1.02931	-2.04104
B7H15_00935	staphylobilin-forming heme oxygenase IsdI	130.123	-1.92393	-3.79456
B7H15_00940	YbaN family protein	61.0416	-2.31448	-4.97427
B7H15_00945	aldehyde dehydrogenase family protein	4202.17	-5.13022	-35.0226
B7H15_00950	cation diffusion facilitator family transporter	765.121	-1.3749	-2.59351
B7H15_00955	hypothetical protein	196.379	-1.95296	-3.87168
B7H15_00965	ABC transporter ATP-binding protein	2843.95	-1.05078	-2.07165
B7H15_00970	ABC transporter substrate-binding protein	3389.35	-1.34806	-2.5457
B7H15_00975	ABC transporter permease	2528.86	-1.63177	-3.09894
B7H15_00980	acyl-CoA/acyl-ACP dehydrogenase	4004.02	-1.77023	-3.41109
B7H15_00985	DUF2294 domain-containing protein	5825.6	-2.01057	-4.02941
B7H15_00990	NAD-dependent formate dehydrogenase	13627.3	-4.63462	-24.8405
B7H15_00995	MFS transporter	2707.72	-3.05352	-8.30236
B7H15_01000	amino acid adenylation domain-containing protein	17457.4	-3.88622	-14.7866
B7H15_01005	4\\'-phosphopantetheinyl transferase superfamily protein	2679.06	-2.65631	-6.30419
B7H15_01010	YagU family protein	1070.53	-2.36592	-5.15483
B7H15_01015	acetylglutamate kinase	43.8823	-1.10959	-2.15784
B7H15_01025	N-acetyl-gamma-glutamyl-phosphate reductase	39.9512	-1.1207	-2.17452
B7H15_01035	branched-chain amino acid transport system II carrier protein	718.161	-1.74902	-3.36129
B7H15_01050	hypothetical protein	7.72969	-3.24975	-9.51202
B7H15_01055	glucose-specific PTS transporter subunit IIBC	1179.96	-2.70833	-6.53563
B7H15_01060	DUF871 domain-containing protein	3163.44	-8.29856	-314.859
B7H15_01065	N-acetylmuramic acid 6-phosphate etherase	1878.66	-7.76228	-217.11
B7H15_01070	PTS transporter subunit EIIC	2969.08	-6.63994	-99.7287
B7H15_01075	MurR/RpiR family transcriptional regulator	1637.57	-6.64272	-99.9214
B7H15_01080	hypothetical protein	43.6859	-1.56245	-2.95354
B7H15_01085	type I restriction endonuclease subunit R	1135.26	-2.80766	-7.0015
B7H15_01100	RES domain-containing protein	496.542	-1.31359	-2.48558
B7H15_01110	ABC transporter permease	267.735	-2.57278	-5.94956
B7H15_01115	ABC transporter permease	252.459	-2.49523	-5.6382
B7H15_01120	peptide ABC transporter substrate-binding protein	504.435	-2.2463	-4.74466
B7H15_01125	gamma-glutamyltransferase	560.676	-1.31775	-2.49277
B7H15_01145	sn-glycerol-3-phosphate ABC transporter ATP-binding protein UgpC	76.9349	-1.66052	-3.1613
B7H15_01150	extracellular solute-binding protein	92.5945	-2.08488	-4.24239
B7H15_01185	hexose-6-phosphate:phosphate antiporter	314.954	-4.19768	-18.3497
B7H15_01235	hypothetical protein	3.09029	-2.22696	-4.68146
B7H15_01240	thiolase family protein	654.385	-5.73735	-53.3475
B7H15_01245	3-hydroxyacyl-CoA dehydrogenase/enoyl-CoA hydratase family protein	960.885	-6.5063	-90.9056
B7H15_01250	acyl-CoA dehydrogenase family protein	485.625	-7.75508	-216.029
B7H15_01255	acyl--CoA ligase	578.439	-7.283	-155.74
B7H15_01260	acyl CoA:acetate/3-ketoacid CoA transferase	1188.62	-7.52616	-184.332
B7H15_01265	PrsW family intramembrane metalloprotease	138.985	-1.44258	-2.71806
B7H15_01270	ABC transporter substrate-binding protein	570.369	-1.48683	-2.80273
B7H15_01300	hypothetical protein	10.7923	-3.42265	-10.7231
B7H15_01305	PTS transporter subunit EIIC	111.939	-2.1031	-4.29632
B7H15_01310	nucleoside hydrolase	226.475	-2.59089	-6.02468
B7H15_01400	sensor histidine kinase	561.806	-1.06543	-2.0928
B7H15_01410	antiholin-like murein hydrolase modulator LrgA	130.9	-2.4154	-5.33468
B7H15_01415	antiholin-like protein LrgB	515.602	-3.36164	-10.2791
B7H15_01420	GntR family transcriptional regulator	535.267	-2.82295	-7.07606
B7H15_01445	class I SAM-dependent methyltransferase	57.0054	-1.56337	-2.95543
B7H15_01455	ribokinase	557.819	-2.7645	-6.79515
B7H15_01460	D-ribose pyranase	241.472	-2.66228	-6.33033
B7H15_01465	ribose transporter RbsU	469.747	-2.7091	-6.53915
B7H15_01485	transposase	25.1023	-1.50871	-2.84556
B7H15_01490	MFS transporter	83.6861	-1.94762	-3.85738
B7H15_01520	hypothetical protein	423.04	-1.54025	-2.90844
B7H15_01525	DUF5079 family protein	29.2977	-1.04073	-2.05727
B7H15_01535	CHAP domain-containing protein	593.931	-4.99156	-31.8134
B7H15_01540	WXG100 family type VII secretion effector EsxA	4584.58	-6.67406	-102.115
B7H15_01545	type VII secretion protein EsaA	860.258	-3.8585	-14.5052
B7H15_01550	type VII secretion protein EssA	103.316	-2.56764	-5.92838
B7H15_01555	type VII secretion protein EsaB	32.8338	-1.72972	-3.31664
B7H15_01560	type VII secretion protein EssB	211.025	-2.39255	-5.25084
B7H15_01565	type VII secretion protein EssC	1031	-1.48293	-2.79516
B7H15_01570	type VII secretion substrate EsaC	100.369	-1.35354	-2.55538
B7H15_01575	WXG100 family type VII secretion effector EsxB	100.689	-1.71981	-3.29393
B7H15_01580	DUF5081 family protein	194.225	-1.29408	-2.45221
B7H15_01590	DNA/RNA non-specific endonuclease	900.989	-1.21478	-2.32105
B7H15_01600	DUF5079 family protein	74.6939	-1.22783	-2.34215
B7H15_01610	hypothetical protein	172.613	-1.83616	-3.57058
B7H15_01665	DUF4467 domain-containing protein	331.417	-1.20098	-2.29896
B7H15_01670	DUF4064 domain-containing protein	587.651	-1.48782	-2.80465
B7H15_01720	winged helix-turn-helix transcriptional regulator	21.0462	-2.15452	-4.45222
B7H15_01725	pseudouridine-5\\'-phosphate glycosidase	22.7721	-2.24963	-4.75561
B7H15_01735	sodium:solute symporter	319.516	-5.72819	-53.01
B7H15_01740	N-acetylneuraminate lyase	159.553	-5.11307	-34.6089
B7H15_01745	ROK family protein	79.7315	-4.52019	-22.9463
B7H15_01755	N-acetylmannosamine-6-phosphate 2-epimerase	132.115	-2.44185	-5.43337
B7H15_01760	YjiH family protein	157.933	-4.51823	-22.9151
B7H15_01765	YSIRK domain-containing triacylglycerol lipase Lip2/Geh	24286.8	-7.64514	-200.178
B7H15_01800	NAD-dependent deacetylase	197.169	-1.15843	-2.23214
B7H15_01805	lipoate--protein ligase	166.687	-1.23785	-2.35847
B7H15_01820	PTS sugar transporter subunit IIB	69.0922	-2.21902	-4.65578
B7H15_01825	PTS sugar transporter subunit IIA	65.6041	-3.08015	-8.45705
B7H15_01830	BglG family transcription antiterminator	222.876	-2.7852	-6.89334
B7H15_01835	hypothetical protein	2.62211	-3.06368	-8.36103
B7H15_01855	glycerol-3-phosphate transporter	205.006	-2.80364	-6.98201
B7H15_01920	helix-turn-helix transcriptional regulator	22.582	-1.32282	-2.50155
B7H15_01925	DUF3169 family protein	132.113	-1.47382	-2.77757
B7H15_01930	ABC transporter ATP-binding protein	232.7	-1.41045	-2.6582
B7H15_02005	hypothetical protein	15.4931	-1.84575	-3.59441
B7H15_02075	hypothetical protein	327.93	-1.04095	-2.05759
B7H15_02080	NDxxF motif lipoprotein	895.232	-1.00612	-2.0085
B7H15_02085	hypothetical protein	138.052	-1.13922	-2.20261
B7H15_02090	alkyl hydroperoxide reductase subunit F	76349.6	-1.96175	-3.89534
B7H15_02095	peroxiredoxin	34341	-1.72086	-3.29634
B7H15_02105	L-cystine transporter	5337.38	-4.26674	-19.2493
B7H15_02110	hypothetical protein	248.673	-6.85912	-116.091
B7H15_02115	hypothetical protein	482.83	-5.84984	-57.6737
B7H15_02130	general stress protein	6149.28	-2.1604	-4.47038
B7H15_02160	type II toxin-antitoxin system PemK/MazF family toxin	43.4888	-1.4406	-2.71433
B7H15_02165	transposase	20.4504	-1.28936	-2.4442
B7H15_02175	hypothetical protein	35.5382	-1.15788	-2.2313
B7H15_02200	superantigen-like protein SSL3	18.2172	-1.25009	-2.37857
B7H15_02280	myeloperoxidase inhibitor SPIN	6542.51	-6.24929	-76.0717
B7H15_02345	hypothetical protein	358.097	-1.12481	-2.18073
B7H15_02350	hypothetical protein	61.6865	-2.15168	-4.44345
B7H15_02355	GTP-binding protein	364.539	-4.45685	-21.9607
B7H15_02360	hypothetical protein	124.092	-5.78777	-55.2448
B7H15_02365	phenol-soluble modulin PSM-alpha-3	9987.99	-12.6347	-6359.63
B7H15_02370	NADH dehydrogenase subunit 5	388.011	-11.6125	-3131.25
B7H15_02375	YbcC family protein	1213.92	-13.2037	-9434.61
B7H15_02380	DUF2294 domain-containing protein	318.896	-7.54235	-186.412
B7H15_02620	Veg family protein	3719.38	-2.70464	-6.51896
B7H15_02835	PLP-dependent aminotransferase family protein	91.8187	-1.10246	-2.14721
B7H15_02840	pyridoxal 5\\'-phosphate synthase lyase subunit PdxS	1332.08	-3.11152	-8.64294
B7H15_02845	pyridoxal 5\\'-phosphate synthase glutaminase subunit PdxT	1630.9	-2.86442	-7.28241
B7H15_02850	NupC/NupG family nucleoside CNT transporter	897.89	-2.67971	-6.40727
B7H15_03005	glycine C-acetyltransferase	2868.97	-1.19235	-2.28525
B7H15_03015	ribulokinase	210.208	-2.64722	-6.26459
B7H15_03020	NAD-dependent epimerase/dehydratase family protein	5345.69	-4.92709	-30.423
B7H15_03070	MSCRAMM family adhesin SdrC	125.048	-1.11071	-2.15952
B7H15_03075	MSCRAMM family adhesin SdrD	443.89	-2.34869	-5.0936
B7H15_03080	MSCRAMM family adhesin SdrE	471.417	-1.52989	-2.88764
B7H15_03200	hypothetical protein	11269.5	-7.19906	-146.938
B7H15_03220	mevalonate kinase	526.92	-1.77434	-3.4208
B7H15_03255	transposase	809.158	-1.36023	-2.56726
B7H15_03260	DUF443 family protein	151.368	-1.29961	-2.46162
B7H15_03265	DUF443 domain-containing protein	205.047	-1.21675	-2.32423
B7H15_03270	DUF443 family protein	199.174	-1.30155	-2.46493
B7H15_03275	DUF443 domain-containing protein	155.141	-1.78359	-3.44283
B7H15_03280	hypothetical protein	47.0485	-2.48478	-5.59748
B7H15_03285	DUF443 family protein	139.095	-1.95399	-3.87446
B7H15_03290	DUF443 domain-containing protein	124.04	-2.26376	-4.80242
B7H15_03295	hypothetical protein	12.45	-1.79702	-3.47501
B7H15_03300	hypothetical protein	56.5806	-1.58306	-2.99604
B7H15_03305	hypothetical protein	40.8492	-1.89276	-3.71345
B7H15_03310	DUF443 domain-containing protein	44.2293	-1.3289	-2.51211
B7H15_03380	hypothetical protein	89.8241	-1.88988	-3.70604
B7H15_03415	hypothetical protein	8839.14	-3.24035	-9.45021
B7H15_03430	global transcriptional regulator SarA	4252.75	-1.87112	-3.65815
B7H15_03515	Na+/H+ antiporter Mnh2 subunit C	20.8603	-1.06999	-2.09942
B7H15_03540	sodium:proton antiporter	2533.11	-1.67228	-3.18718
B7H15_03545	metal ABC transporter substrate-binding protein	9923.06	-7.02981	-130.672
B7H15_03550	metal ABC transporter permease	7925.99	-7.38902	-167.617
B7H15_03555	metal ABC transporter ATP-binding protein	8091.62	-7.03456	-131.104
B7H15_03605	ABC transporter ATP-binding protein/permease	13299.5	-3.87919	-14.7148
B7H15_03610	nucleoside permease	1554.96	-2.08958	-4.25624
B7H15_03640	dihydroxyacetone kinase subunit DhaK	414.274	-2.77524	-6.84591
B7H15_03645	dihydroxyacetone kinase subunit L	284.45	-2.67872	-6.40289
B7H15_03650	PTS-dependent dihydroxyacetone kinase phosphotransferase subunit DhaM	226.361	-2.11493	-4.3317
B7H15_03680	GNAT family N-acetyltransferase	1545.89	-1.26635	-2.40552
B7H15_03800	GNAT family N-acetyltransferase	302.885	-2.15682	-4.45932
B7H15_03840	GTP-binding protein	307.163	-1.31277	-2.48419
B7H15_03930	two-component system sensor histidine kinase SaeS	5470.72	-3.35466	-10.2294
B7H15_03935	response regulator transcription factor SaeR	4435.68	-3.3873	-10.4636
B7H15_03940	DoxX family protein	2026.41	-5.39485	-42.0737
B7H15_03945	DM13 domain-containing protein	3104.49	-5.3337	-40.3279
B7H15_03950	hypothetical protein	522.649	-1.08139	-2.11608
B7H15_04000	polyglycerol-phosphate lipoteichoic acid synthase LtaS	9650.56	-1.21753	-2.32548
B7H15_04055	peptide MFS transporter	2237.78	-1.51268	-2.85339
B7H15_04110	ABC transporter permease	83.3611	-2.80838	-7.00498
B7H15_04115	iron chelate uptake ABC transporter family permease subunit	63.47	-1.28882	-2.44327
B7H15_04120	ABC transporter ATP-binding protein	42.1277	-1.35223	-2.55307
B7H15_04125	siderophore ABC transporter substrate-binding protein	204.521	-1.10816	-2.1557
B7H15_04210	ribosome-associated translation inhibitor RaiA	4192.65	-2.74395	-6.69904
B7H15_04260	hypothetical protein	59.7838	-3.36408	-10.2965
B7H15_04290	hypothetical protein	2525.79	-4.67176	-25.4882
B7H15_04300	RNase adapter RapZ	801.682	-1.13503	-2.19624
B7H15_04370	hypothetical protein	723.573	-1.03371	-2.04728
B7H15_04405	hypothetical protein	410.426	-2.77677	-6.85317
B7H15_04410	hypothetical protein	113.947	-3.06045	-8.34233
B7H15_04415	DUF5067 domain-containing protein	314.958	-4.56186	-23.6188
B7H15_04445	extracellular matrix protein-binding adhesin Emp	65.2925	-3.86149	-14.5353
B7H15_04455	thermonuclease family protein	567.173	-3.30043	-9.85211
B7H15_04460	cold-shock protein	4445.07	-3.47846	-11.1461
B7H15_04470	hypothetical protein	189.905	-1.05311	-2.07499
B7H15_04480	hypothetical protein	334.996	-3.32876	-10.0475
B7H15_04485	hypothetical protein	195.831	-2.66575	-6.34558
B7H15_04495	hypothetical protein	1683.71	-1.05002	-2.07055
B7H15_04500	phosphoglycerate mutase family protein	401.047	-2.43257	-5.39855
B7H15_04545	hypothetical protein	38.4035	-2.47565	-5.56217
B7H15_04550	DUF1963 domain-containing protein	515.122	-2.1448	-4.42232
B7H15_04595	staphylococcal enterotoxin type Q	257.834	-1.03815	-2.0536
B7H15_04690	CsbD family protein	11137	-1.41192	-2.66092
B7H15_04730	chorismate mutase	13.5142	-1.32775	-2.51012
B7H15_04735	hypothetical protein	20.7801	-1.92569	-3.79919
B7H15_04785	DUF86 domain-containing protein	581.236	-1.13185	-2.1914
B7H15_04840	NAD(P)/FAD-dependent oxidoreductase	2563.72	-1.0386	-2.05424
B7H15_04865	Na+/H+ antiporter family protein	150.827	-1.32158	-2.4994
B7H15_04925	S1 RNA-binding domain-containing protein	2294.83	-1.37029	-2.58522
B7H15_04935	ornithine--oxo-acid transaminase	5155.74	-3.80981	-14.0238
B7H15_04940	Glu/Leu/Phe/Val dehydrogenase	10821.2	-4.15199	-17.7776
B7H15_04945	nitrogen fixation protein NifR	125.993	-3.48388	-11.188
B7H15_04950	hypothetical protein	892.868	-4.87763	-29.3977
B7H15_04955	glycerophosphodiester phosphodiesterase	249.837	-2.63844	-6.22658
B7H15_05035	LysR family transcriptional regulator	37.7506	-1.26041	-2.39565
B7H15_05050	membrane protein	30.9087	-1.82091	-3.53303
B7H15_05055	YbhB/YbcL family Raf kinase inhibitor-like protein	22.9762	-2.0565	-4.15977
B7H15_05060	MAP domain-containing protein	2221.05	-1.66768	-3.17702
B7H15_05085	ABC transporter permease	467.367	-2.22982	-4.69074
B7H15_05090	ABC transporter permease	662.639	-2.83485	-7.13468
B7H15_05095	ABC transporter ATP-binding protein	741.672	-2.91773	-7.55654
B7H15_05100	ATP-binding cassette domain-containing protein	829.984	-2.76226	-6.78457
B7H15_05105	peptide ABC transporter substrate-binding protein	1648.91	-2.44252	-5.43591
B7H15_05125	ABC transporter permease	96.711	-1.79191	-3.46273
B7H15_05215	cell elongation protein CozEa	1422.47	-1.39623	-2.63214
B7H15_05230	YjcG family protein	3333.07	-3.154	-8.90121
B7H15_05290	competence protein ComK	161.003	-2.24243	-4.73194
B7H15_05315	putative holin-like toxin	169.914	-3.92871	-15.2285
B7H15_05345	hypothetical protein	95.2802	-3.62169	-12.3094
B7H15_05350	hypothetical protein	73.9224	-6.09095	-68.1647
B7H15_05355	glycosyltransferase	1156.15	-5.94329	-61.5329
B7H15_05365	ABC transporter substrate-binding protein	119.982	-1.83654	-3.57153
B7H15_05415	staphostatin B	2296.69	-4.45758	-21.9718
B7H15_05420	cysteine protease staphopain B	6088.16	-4.74765	-26.8648
B7H15_05425	Glu-specific serine endopeptidase SspA	4619.87	-5.66454	-50.722
B7H15_05440	MarR family transcriptional regulator	69.5543	-2.44432	-5.44267
B7H15_05445	hypothetical protein	16.9432	-1.99416	-3.98383
B7H15_05475	cytochrome aa3 quinol oxidase subunit IV	1725.63	-2.16682	-4.49034
B7H15_05480	cytochrome aa3 quinol oxidase subunit III	4664.56	-2.13963	-4.4065
B7H15_05485	cytochrome aa3 quinol oxidase subunit I	14803.1	-2.12543	-4.36333
B7H15_05490	cytochrome aa3 quinol oxidase subunit II	9345.07	-2.11584	-4.33442
B7H15_05505	hypothetical protein	425.829	-2.30971	-4.95784
B7H15_05510	bifunctional methylenetetrahydrofolate dehydrogenase/methenyltetrahydrofolate cyclohydrolase FolD	3476.91	-2.2098	-4.62611
B7H15_05515	5-(carboxyamino)imidazole ribonucleotide mutase	541.504	-1.29184	-2.44841
B7H15_05520	5-(carboxyamino)imidazole ribonucleotide synthase	1977.83	-1.19082	-2.28283
B7H15_05525	phosphoribosylaminoimidazolesuccinocarboxamide synthase	663.696	-1.25282	-2.38307
B7H15_05530	phosphoribosylformylglycinamidine synthase subunit PurS	556.667	-1.33096	-2.51569
B7H15_05535	phosphoribosylformylglycinamidine synthase I	1365.87	-1.41294	-2.6628
B7H15_05540	phosphoribosylformylglycinamidine synthase subunit PurL	3934.41	-1.33646	-2.52531
B7H15_05545	amidophosphoribosyltransferase	2602.59	-1.20275	-2.30179
B7H15_05550	phosphoribosylformylglycinamidine cyclo-ligase	1913.19	-1.13656	-2.19857
B7H15_05650	ribonuclease J	7712.85	-1.60525	-3.04249
B7H15_05655	DNA-dependent RNA polymerase auxiliary subunit epsilon family protein	796.629	-1.44158	-2.71618
B7H15_05735	Nramp family divalent metal transporter	1205.26	-2.92504	-7.59496
B7H15_05740	YktB family protein	721.222	-1.0232	-2.03242
B7H15_05750	DUF5325 family protein	250.571	-1.32945	-2.51308
B7H15_05800	hypothetical protein	30.8804	-2.09604	-4.27534
B7H15_05865	LPXTG-anchored heme-scavenging protein IsdA	286.263	-2.41145	-5.32008
B7H15_05870	heme uptake protein IsdC	141.603	-3.77468	-13.6865
B7H15_05875	iron-regulated surface determinant protein IsdD	129.313	-2.59104	-6.02534
B7H15_05880	heme ABC transporter substrate-binding protein IsdE	117.034	-1.92392	-3.79452
B7H15_05885	hemin ABC transporter permease protein IsdF	127.33	-1.27576	-2.42127
B7H15_05910	phenylalanine--tRNA ligase subunit alpha	449.063	-1.30624	-2.47297
B7H15_05930	cell division protein ZapA	274.554	-1.22414	-2.33616
B7H15_05965	succinate dehydrogenase cytochrome b558 subunit	2098.44	-4.66841	-25.4292
B7H15_05970	succinate dehydrogenase flavoprotein subunit	9508.06	-4.13808	-17.607
B7H15_05975	succinate dehydrogenase iron-sulfur subunit	7137.61	-4.12419	-17.4383
B7H15_06000	complement convertase inhibitor Ecb	451.058	-4.86087	-29.058
B7H15_06005	hypothetical protein	14.7923	-3.7213	-13.1894
B7H15_06010	formyl peptide receptor-like 1 inhibitory protein	161.013	-4.87679	-29.3806
B7H15_06015	hypothetical protein	155.178	-2.54545	-5.83789
B7H15_06020	complement convertase inhibitor Efb	501.076	-6.60362	-97.2494
B7H15_06025	complement inhibitor SCIN-B	510.003	-6.57859	-95.5768
B7H15_06030	hypothetical protein	67.8856	-1.60195	-3.03554
B7H15_06035	hypothetical protein	137.915	-1.76067	-3.38856
B7H15_06040	hypothetical protein	113.306	-1.9452	-3.85091
B7H15_06045	hypothetical protein	199.41	-2.06724	-4.19085
B7H15_06050	alpha-hemolysin	14376.7	-11.234	-2408.62
B7H15_06055	hypothetical protein	3.16886	-3.8283	-14.2047
B7H15_06060	hypothetical protein	60.4338	-4.13214	-17.5347
B7H15_06070	superantigen-like protein SSL12	25.4679	-1.35833	-2.56389
B7H15_06075	superantigen-like protein SSL13	13.9504	-1.49868	-2.82585
B7H15_06080	superantigen-like protein SSL14	14.9104	-1.96965	-3.91673
B7H15_06085	ornithine carbamoyltransferase	35.2839	-3.10924	-8.62926
B7H15_06100	hypothetical protein	290.435	-3.10798	-8.62175
B7H15_06105	TDT family transporter	255.353	-1.50046	-2.82933
B7H15_06110	hypothetical protein	35.309	-2.29081	-4.89329
B7H15_06120	beta-class phenol-soluble modulin	4162.61	-12.3647	-5274.15
B7H15_06125	beta-class phenol-soluble modulin	2045.75	-10.8618	-1860.98
B7H15_06220	isoleucine--tRNA ligase	2509.4	-1.21411	-2.31998
B7H15_06245	bifunctional pyr operon transcriptional regulator/uracil phosphoribosyltransferase PyrR	677.088	-2.04922	-4.13881
B7H15_06290	VOC family protein	1006.65	-1.44994	-2.73197
B7H15_06320	hypothetical protein	469.605	-2.87273	-7.3245
B7H15_06325	TM2 domain-containing protein	1077.74	-1.72092	-3.29647
B7H15_06375	50S ribosomal protein L28	7926.71	-2.15178	-4.44377
B7H15_06420	acyl carrier protein	2006.46	-1.3709	-2.58632
B7H15_06470	lipoteichoic acid-specific glycosyltransferase YfhO	936.629	-1.30138	-2.46464
B7H15_06485	ADP-forming succinate--CoA ligase subunit beta	7094.61	-2.90588	-7.49474
B7H15_06490	succinate--CoA ligase subunit alpha	12232.9	-3.08659	-8.49489
B7H15_06495	LysM peptidoglycan-binding domain-containing protein	57.0971	-2.17991	-4.53126
B7H15_06500	FemA/FemB family glycyltransferase FmhC	110.028	-1.17647	-2.26023
B7H15_06505	DNA-processing protein DprA	50.3034	-1.32985	-2.51376
B7H15_06630	tRNA pseudouridine(55) synthase TruB	720.166	-1.6615	-3.16346
B7H15_06770	aquaporin family protein	701.46	-4.49954	-22.6202
B7H15_06780	glycerol-3-phosphate dehydrogenase/oxidase	1470.71	-1.08366	-2.11941
B7H15_06795	RNA chaperone Hfq	173.065	-1.61732	-3.06805
B7H15_06835	hypothetical protein	25.3103	-1.87577	-3.66997
B7H15_06845	hypothetical protein	26.4667	-1.3717	-2.58775
B7H15_06900	hypothetical protein	65.7504	-1.4157	-2.66789
B7H15_06920	low specificity L-threonine aldolase	216.835	-3.95277	-15.4847
B7H15_06935	ABC transporter ATP-binding protein	24.9725	-1.58908	-3.00858
B7H15_06970	hypothetical protein	449.597	-4.69313	-25.8685
B7H15_06975	aspartate kinase	193.139	-1.44761	-2.72756
B7H15_07105	aconitate hydratase AcnA	12115.8	-2.22347	-4.67017
B7H15_07170	bifunctional lysylphosphatidylglycerol flippase/synthetase MprF	3028.74	-1.51948	-2.86687
B7H15_07205	anthranilate synthase component I	34.8351	-1.07426	-2.10564
B7H15_07290	oligoendopeptidase F	1638.6	-1.39193	-2.6243
B7H15_07365	amidohydrolase	285.365	-1.27523	-2.42037
B7H15_07370	alanine racemase	216.853	-1.42072	-2.6772
B7H15_07380	sarA expression modulator MsaC	11.4102	-1.68792	-3.22191
B7H15_07435	hypothetical protein	573.293	-1.1192	-2.17226
B7H15_07445	dihydrolipoyllysine-residue succinyltransferase	10308.9	-3.60879	-12.1999
B7H15_07450	2-oxoglutarate dehydrogenase E1 component	18347.1	-3.91345	-15.0683
B7H15_07470	hypothetical protein	20.508	-3.74254	-13.385
B7H15_07570	hyperosmolarity resistance protein Ebh	1738.83	-1.65531	-3.14991
B7H15_07740	nucleoside-diphosphate kinase	608.948	-2.7235	-6.60475
B7H15_07765	HU family DNA-binding protein	18990.2	-1.39553	-2.63086
B7H15_07780	30S ribosomal protein S1	16026.3	-1.06433	-2.0912
B7H15_07820	elastin-binding protein EbpS	8923.35	-1.80984	-3.50603
B7H15_07830	helix-turn-helix domain-containing protein	418.317	-1.60059	-3.03267
B7H15_07840	ECF transporter S component	1559.11	-1.66813	-3.17801
B7H15_07875	Panton-Valentine bi-component leukocidin subunit F	3338.83	-3.38336	-10.435
B7H15_07880	Panton-Valentine bi-component leukocidin subunit S	2951.96	-4.15223	-17.7805
B7H15_08160	helix-turn-helix domain-containing protein	5.36597	-2.14151	-4.41224
B7H15_08165	helix-turn-helix domain-containing protein	147.27	-1.95304	-3.8719
B7H15_08170	hypothetical protein	140.298	-2.42573	-5.37301
B7H15_08175	hypothetical protein	97.31	-2.90843	-7.50798
B7H15_08180	hypothetical protein	183.075	-2.37149	-5.17476
B7H15_08185	hypothetical protein	365.65	-2.12298	-4.35594
B7H15_08190	hypothetical protein	747.101	-2.42377	-5.36572
B7H15_08195	site-specific integrase	215.732	-2.12104	-4.35008
B7H15_08200	hypothetical protein	458.217	-1.84064	-3.58169
B7H15_08205	hypothetical protein	508.812	-1.8676	-3.64924
B7H15_08210	DUF1672 domain-containing protein	490.828	-1.57722	-2.98395
B7H15_08220	two-component system response regulator SrrA	2451.68	-1.47475	-2.77935
B7H15_08245	site-specific tyrosine recombinase XerD	1317.24	-1.69715	-3.24259
B7H15_08250	transcriptional repressor	1726.43	-1.73503	-3.32886
B7H15_08295	alpha-glucosidase	899.241	-3.36706	-10.3178
B7H15_08300	LacI family DNA-binding transcriptional regulator	249.72	-4.13456	-17.5641
B7H15_08435	aminomethyl-transferring glycine dehydrogenase subunit GcvPB	6426.79	-3.05171	-8.29193
B7H15_08440	aminomethyl-transferring glycine dehydrogenase subunit GcvPA	4730.39	-2.67822	-6.40064
B7H15_08445	glycine cleavage system aminomethyltransferase GcvT	2363.41	-2.62311	-6.16076
B7H15_08450	shikimate kinase	218.764	-1.17238	-2.25383
B7H15_08475	prepilin-type N-terminal cleavage/methylation domain-containing protein	6.31146	-1.63689	-3.10994
B7H15_08480	type II secretion system F family protein	20.5402	-1.13584	-2.19747
B7H15_08485	GspE/PulE family protein	51.977	-1.9199	-3.78397
B7H15_08515	5-formyltetrahydrofolate cyclo-ligase	498.396	-1.4681	-2.76656
B7H15_08625	hypothetical protein	4288.03	-2.81066	-7.01607
B7H15_08630	flotillin-like protein FloA	4203.32	-2.46316	-5.51422
B7H15_08635	hypothetical protein	2438.07	-2.75606	-6.75549
B7H15_08765	hypothetical protein	52.4433	-1.11329	-2.16338
B7H15_08780	divalent metal cation transporter	908.444	-3.42215	-10.7194
B7H15_08785	5-oxoprolinase subunit PxpA	621.009	-3.26479	-9.61167
B7H15_08790	acetyl-CoA carboxylase biotin carboxylase subunit	1018.41	-3.35381	-10.2234
B7H15_08795	acetyl-CoA carboxylase biotin carboxyl carrier protein subunit	283.921	-3.30155	-9.85977
B7H15_08800	biotin-dependent carboxyltransferase family protein	696.592	-3.10122	-8.58146
B7H15_08805	5-oxoprolinase subunit PxpB	357.138	-3.55954	-11.7904
B7H15_08900	replication-associated recombination protein A	1494.21	-1.42165	-2.67891
B7H15_08910	hypothetical protein	19.6483	-2.09279	-4.26571
B7H15_09040	DNA repair protein RadC	34.2018	-2.90949	-7.51351
B7H15_09045	A24 family peptidase	65.657	-2.05977	-4.1692
B7H15_09070	AbrB family transcriptional regulator	883.738	-2.15488	-4.45332
B7H15_09075	hypothetical protein	11.3734	-1.29061	-2.44632
B7H15_09190	type I glyceraldehyde-3-phosphate dehydrogenase	5745.8	-5.45354	-43.8206
B7H15_09210	hypothetical protein	92.6565	-1.06188	-2.08765
B7H15_09215	PAS domain S-box protein	2585.63	-1.50796	-2.84408
B7H15_09220	response regulator transcription factor	1288.37	-1.2737	-2.41781
B7H15_09225	hypothetical protein	71.8343	-4.84587	-28.7575
B7H15_09230	NADP-dependent isocitrate dehydrogenase	9033.35	-2.91116	-7.52222
B7H15_09235	citrate synthase	4768.18	-3.11022	-8.63515
B7H15_09240	amino acid permease	4416.05	-1.31834	-2.49379
B7H15_09310	alanine dehydrogenase	3527.84	-4.29354	-19.6103
B7H15_09430	hypothetical protein	53.767	-1.74794	-3.35878
B7H15_09435	haptoglobin-binding heme uptake protein HarA	4756.98	-4.58508	-24.002
B7H15_09440	formate--tetrahydrofolate ligase	11191.7	-3.71493	-13.1312
B7H15_09445	acetate--CoA ligase	3400.41	-6.29085	-78.2953
B7H15_09450	hypothetical protein	340.491	-4.8566	-28.9723
B7H15_09455	acetoin utilization protein AcuC	818.172	-4.69299	-25.8661
B7H15_09470	bifunctional 3-deoxy-7-phosphoheptulonate synthase/chorismate mutase	1416.08	-1.12798	-2.18553
B7H15_09485	DUF948 domain-containing protein	14733.9	-1.00807	-2.01121
B7H15_09610	MarR family transcriptional regulator	2071.34	-2.44199	-5.43392
B7H15_09635	proline dehydrogenase	1167.84	-4.86142	-29.0692
B7H15_09705	CPBP family intramembrane metalloprotease SdpA	47.0054	-1.59426	-3.0194
B7H15_09750	phosphoenolpyruvate carboxykinase (ATP)	7376.74	-6.47976	-89.2486
B7H15_09790	excalibur calcium-binding domain-containing protein	1527.1	-9.36213	-658.086
B7H15_09795	DUF4352 domain-containing protein	3656.74	-9.27099	-617.797
B7H15_09800	hypothetical protein	25.4603	-3.93964	-15.3444
B7H15_09805	DUF3969 family protein	15.6432	-2.79043	-6.91835
B7H15_09810	hypothetical protein	48.8867	-1.26837	-2.4089
B7H15_09880	serine protease SplF	284.625	-3.91732	-15.1089
B7H15_09885	serine protease SplE	296.677	-4.04364	-16.4914
B7H15_09890	serine protease SplD	388.787	-4.56203	-23.6215
B7H15_09895	serine protease SplC	372.95	-2.98982	-7.94376
B7H15_09900	serine protease SplB	338.668	-4.65658	-25.2215
B7H15_09905	serine protease SplA	277.571	-6.15958	-71.4856
B7H15_09910	hypothetical protein	7.56318	-2.83189	-7.12005
B7H15_09915	DUF4888 domain-containing protein	240.861	-5.72083	-52.7403
B7H15_09920	hypothetical protein	1121.86	-1.74192	-3.3448
B7H15_09925	lantibiotic immunity ABC transporter MutE/EpiE family permease subunit	1110.7	-1.0907	-2.12977
B7H15_09935	S8 family serine peptidase	643.842	-1.11777	-2.17012
B7H15_09940	flavoprotein	27.0912	-2.1794	-4.52966
B7H15_09945	lanthionine synthetase C family protein	81.6754	-1.51423	-2.85645
B7H15_09950	lantibiotic dehydratase	261.163	-2.16281	-4.47786
B7H15_09955	gallidermin/nisin family lantibiotic	18.8803	-1.67402	-3.19104
B7H15_09965	gallidermin/nisin family lantibiotic	7.03694	-1.52468	-2.87723
B7H15_09970	bi-component leukocidin LukED subunit D	47.2864	-1.88101	-3.68333
B7H15_09975	bi-component leukocidin LukED subunit E	29.8173	-1.3058	-2.47221
B7H15_09980	hypothetical protein	46.4897	-1.43491	-2.70365
B7H15_09985	hypothetical protein	419.373	-1.06446	-2.09139
B7H15_10160	class II fumarate hydratase	3571.98	-1.76407	-3.39654
B7H15_10165	hypothetical protein	105.715	-1.06647	-2.09431
B7H15_10390	aromatic acid exporter family protein	1376.41	-1.11241	-2.16207
B7H15_10520	aromatic acid exporter family protein	156.771	-1.81928	-3.52905
B7H15_10570	DUF3267 domain-containing protein	674.842	-1.5246	-2.87707
B7H15_10580	diacylglycerol kinase	865.696	-1.13319	-2.19342
B7H15_10585	hypothetical protein	317.738	-1.42434	-2.68392
B7H15_10610	sodium/proline symporter PutP	989.479	-2.84425	-7.18133
B7H15_10650	cysteine protease staphopain A	571.203	-2.51625	-5.72093
B7H15_10680	nitric oxide synthase oxygenase	515.855	-1.92883	-3.80745
B7H15_10685	prephenate dehydratase	444.496	-1.1342	-2.19497
B7H15_10690	hypothetical protein	101.369	-2.18964	-4.56193
B7H15_10695	SLC13 family permease	1121.6	-1.73065	-3.31878
B7H15_10720	aldehyde dehydrogenase	2006.69	-1.67406	-3.19111
B7H15_10770	phenol-soluble modulin export ABC transporter permease subunit PmtD	752.48	-1.135	-2.19619
B7H15_10775	phenol-soluble modulin export ABC transporter ATP-binding protein PmtC	1087.24	-1.12477	-2.18066
B7H15_10780	phenol-soluble modulin export ABC transporter permease subunit PmtB	428.652	-1.26048	-2.39575
B7H15_10785	phenol-soluble modulin export ABC transporter ATP-binding protein PmtA	1030.64	-1.27338	-2.41727
B7H15_10790	GntR family transcriptional regulator	185.865	-1.6667	-3.17488
B7H15_10810	MAP domain-containing protein	474.137	-4.14536	-17.696
B7H15_10815	extracellular adherence protein Eap/Map	2709.56	-4.37222	-20.7095
B7H15_10820	hypothetical protein	294.849	-4.86709	-29.1836
B7H15_10885	hypothetical protein	851.456	-1.09734	-2.1396
B7H15_11175	sphingomyelin phosphodiesterase	66.9577	-1.41052	-2.65832
B7H15_11180	bi-component leukocidin LukGH subunit G	462.803	-2.64165	-6.24045
B7H15_11185	bi-component leukocidin LukGH subunit H	467.356	-4.46651	-22.1082
B7H15_11205	iron-hydroxamate ABC transporter substrate-binding protein	44.5301	-1.809	-3.50399
B7H15_11280	delta-lysin family phenol-soluble modulin	113294	-13.4531	-11215
B7H15_11285	accessory gene regulator AgrB	12729.5	-6.5498	-93.6884
B7H15_11290	cyclic lactone autoinducer peptide	3919.11	-6.79196	-110.811
B7H15_11295	GHKL domain-containing protein	23986.3	-6.7382	-106.758
B7H15_11300	LytTR family DNA-binding domain-containing protein	18615.4	-6.48135	-89.3471
B7H15_11305	hypothetical protein	40.1308	-3.03601	-8.20219
B7H15_11320	LacI family DNA-binding transcriptional regulator	330.268	-2.56042	-5.89879
B7H15_11540	potassium-transporting ATPase subunit KdpA	28.6879	-1.19872	-2.29536
B7H15_11550	sensor histidine kinase KdpD	427.477	-2.56592	-5.92132
B7H15_11555	response regulator transcription factor	102.237	-2.95583	-7.75877
B7H15_11580	hypothetical protein	1698.55	-1.66884	-3.17959
B7H15_11595	cardiolipin synthase	771.984	-1.80699	-3.49911
B7H15_11600	HD domain-containing protein	352.765	-1.79262	-3.46442
B7H15_11605	hypothetical protein	51.1016	-2.97811	-7.87954
B7H15_11610	hypothetical protein	63.0027	-2.56546	-5.91945
B7H15_11615	hypothetical protein	93.1081	-2.51138	-5.70166
B7H15_11625	thiamine phosphate synthase	640.141	-2.80955	-7.01065
B7H15_11630	hydroxyethylthiazole kinase	713.957	-2.67983	-6.40781
B7H15_11635	bifunctional hydroxymethylpyrimidine kinase/phosphomethylpyrimidine kinase	663.907	-2.49337	-5.63091
B7H15_11640	thiaminase II	459.334	-2.36142	-5.13878
B7H15_11650	single-stranded DNA-binding protein	316.146	-1.3678	-2.58077
B7H15_11675	hypothetical protein	2.37358	-2.35493	-5.11568
B7H15_11680	F0F1 ATP synthase subunit epsilon	2396.97	-1.56966	-2.96835
B7H15_11685	F0F1 ATP synthase subunit beta	7493.83	-1.1432	-2.20871
B7H15_11690	F0F1 ATP synthase subunit gamma	4657.73	-1.02037	-2.02844
B7H15_11710	F0F1 ATP synthase subunit C	1121.71	-1.25813	-2.39186
B7H15_11850	membrane protein	1512.87	-2.24514	-4.74084
B7H15_11855	#N/A	2730.54	-4.56425	-23.6579
B7H15_11860	hypothetical protein	197.207	-5.34254	-40.5757
B7H15_11865	deoxyribose-phosphate aldolase	845.613	-3.54362	-11.661
B7H15_11920	hypothetical protein	859.997	-1.87118	-3.65831
B7H15_11925	resolvase	59.5649	-1.62957	-3.09421
B7H15_11930	SAP domain-containing protein	339.357	-1.1857	-2.27473
B7H15_11935	hypothetical protein	5.46384	-2.14949	-4.4367
B7H15_11975	methicillin resistance protein FmtB	337.426	-1.53302	-2.89391
B7H15_11995	arginase	1628.7	-3.20629	-9.22972
B7H15_12095	hypothetical protein	3488.14	-6.19882	-73.4566
B7H15_12135	staphyloferrin A export MFS transporter	225.334	-2.06871	-4.19512
B7H15_12140	D-ornithine--citrate ligase SfaD	992.89	-2.17134	-4.50442
B7H15_12150	Asp23/Gls24 family envelope stress response protein	42807.6	-1.25855	-2.39255
B7H15_12155	DUF2273 domain-containing protein	10310.4	-1.21276	-2.3178
B7H15_12160	alkaline shock response membrane anchor protein AmaP	23559.7	-1.27912	-2.42691
B7H15_12185	6-phospho-beta-galactosidase	282.465	-1.9203	-3.78501
B7H15_12190	lactose-specific PTS transporter subunit EIIC	245.384	-2.88357	-7.37975
B7H15_12195	PTS lactose/cellobiose transporter subunit IIA	30.8978	-3.59743	-12.1042
B7H15_12200	tagatose-bisphosphate aldolase	109.395	-4.36988	-20.6759
B7H15_12205	tagatose-6-phosphate kinase	108.861	-4.25021	-19.0301
B7H15_12210	hypothetical protein	121.144	-4.88747	-29.5988
B7H15_12255	hyaluronate lyase HysA	117.292	-1.02955	-2.04139
B7H15_12265	HAD-IIB family hydrolase	379.967	-1.1438	-2.20962
B7H15_12270	MAP domain-containing protein	5847.6	-2.39776	-5.26985
B7H15_12295	hypothetical protein	930.425	-1.94272	-3.8443
B7H15_12300	AAA family ATPase	1040	-2.88758	-7.40031
B7H15_12305	hypothetical protein	833.668	-3.29908	-9.84288
B7H15_12310	hypothetical protein	178.357	-3.33967	-10.1237
B7H15_12565	winged helix DNA-binding protein	30.5498	-1.31903	-2.49498
B7H15_12570	MFS transporter	98.2072	-1.02732	-2.03823
B7H15_12725	HTH-type transcriptional regulator SarR	2103.65	-1.84229	-3.58579
B7H15_12740	SarA family transcriptional regulator	40.5812	-1.10473	-2.15058
B7H15_12745	helix-turn-helix domain-containing protein	195.184	-2.40785	-5.30684
B7H15_12755	hypothetical protein	1619.31	-1.625	-3.08442
B7H15_12845	MurR/RpiR family transcriptional regulator	1250.67	-1.23079	-2.34696
B7H15_12885	alpha-glucoside-specific PTS transporter subunit IIBC	304.786	-1.62095	-3.07578
B7H15_12920	imidazolonepropionase	2630.26	-5.54961	-46.838
B7H15_12925	urocanate hydratase	2130.82	-7.01337	-129.192
B7H15_12930	LysR family transcriptional regulator	143.979	-3.36328	-10.2908
B7H15_12935	FosB1/FosB3 family fosfomycin resistance bacillithiol transferase	36.1671	-1.23414	-2.35241
B7H15_12985	DUF805 domain-containing protein	421.696	-1.48763	-2.80427
B7H15_12990	DNA-3-methyladenine glycosylase	70.44	-1.00593	-2.00824
B7H15_13120	malate dehydrogenase (quinone)	2782.87	-2.89721	-7.44985
B7H15_13125	L-lactate permease	3188.43	-2.79496	-6.94012
B7H15_13135	hypothetical protein	4210.64	-1.04538	-2.06392
B7H15_13195	YbgA family protein	81.1176	-2.54272	-5.82688
B7H15_13200	AraC family transcriptional regulator Rsp	523.175	-1.16522	-2.24268
B7H15_13225	MarR family transcriptional regulator	2015.42	-1.51913	-2.86619
B7H15_13265	nitrate respiration regulation accessory nitrate sensor NreA	997.731	-1.13216	-2.19187
B7H15_13270	respiratory nitrate reductase subunit gamma	431.34	-1.63743	-3.11111
B7H15_13385	hypothetical protein	13.0918	-2.8324	-7.12256
B7H15_13390	putative metal homeostasis protein	69.2864	-2.61574	-6.1294
B7H15_13405	hypothetical protein	8.27755	-1.89386	-3.71629
B7H15_13410	immunoglobulin-binding protein Sbi	1325.97	-2.45437	-5.48073
B7H15_13415	hypothetical protein	152.112	-2.85266	-7.2233
B7H15_13425	bi-component gamma-hemolysin HlgAB subunit A	408.169	-5.60302	-48.6047
B7H15_13430	bi-component gamma-hemolysin HlgCB subunit C	273.32	-4.37073	-20.6881
B7H15_13435	bi-component gamma-hemolysin HlgAB/HlgCB subunit B	444.314	-2.79781	-6.95383
B7H15_13520	multidrug effflux MFS transporter	821.722	-1.05717	-2.08085
B7H15_13540	amino acid permease	1080.21	-4.12492	-17.4472
B7H15_13590	ABC transporter permease	595.059	-1.25141	-2.38073
B7H15_13595	osmoprotectant ABC transporter substrate-binding protein	722.176	-1.45168	-2.73527
B7H15_13600	ABC transporter permease	355.647	-1.2666	-2.40594
B7H15_13605	ABC transporter ATP-binding protein	770.839	-1.38629	-2.61406
B7H15_13640	carboxylesterase/lipase family protein	2515.38	-2.39206	-5.24906
B7H15_13645	MFS transporter	298.924	-1.73458	-3.32783
B7H15_13650	iron export ABC transporter permease subunit FetB	817.788	-1.57444	-2.9782
B7H15_13700	ABC transporter ATP-binding protein	72.0001	-1.10798	-2.15543
B7H15_13710	ABC transporter permease	40.6972	-1.58657	-3.00334
B7H15_13720	staphylopine-dependent metal ABC transporter substrate-binding protein CntA	211.597	-1.338	-2.528
B7H15_13730	D-histidine (S)-2-aminobutanoyltransferase CntL	36.4405	-1.89111	-3.70921
B7H15_13760	carboxymuconolactone decarboxylase family protein	1603.11	-1.46919	-2.76866
B7H15_13775	hypothetical protein	8.02618	-1.45136	-2.73465
B7H15_13780	DUF1433 domain-containing protein	256.133	-1.07612	-2.10836
B7H15_13800	hypothetical protein	510.713	-2.35246	-5.10696
B7H15_13850	phospho-sugar mutase	587.755	-1.73742	-3.33437
B7H15_13860	hypothetical protein	51.7814	-1.37828	-2.59958
B7H15_13880	YSIRK signal domain/LPXTG anchor domain surface protein	780.237	-1.73854	-3.33697
B7H15_13890	HTH-type transcriptional regulator SarU	9.37337	-1.76228	-3.39234
B7H15_13955	MFS transporter	1276.61	-3.53137	-11.5624
B7H15_13995	fructose-1,6-bisphosphatase	1853.21	-4.98602	-31.6913
B7H15_14045	ATP-binding cassette domain-containing protein	25.24	-1.29937	-2.46122
B7H15_14050	peptide ABC transporter permease	55.3111	-1.39202	-2.62446
B7H15_14075	L-serine ammonia-lyase, iron-sulfur-dependent, subunit alpha	425.759	-1.88588	-3.69579
B7H15_14080	L-serine ammonia-lyase, iron-sulfur-dependent subunit beta	259.827	-2.75573	-6.75395
B7H15_14085	PTS fructose transporter subunit IIC	432.381	-3.61487	-12.2514
B7H15_14095	DMT family transporter	711.969	-1.51713	-2.86221
B7H15_14140	sterile alpha motif-like domain-containing protein	2381.18	-2.54659	-5.84251
B7H15_14190	ferrous iron transport protein B	148.57	-1.82894	-3.55277
B7H15_14195	ferrous iron transport protein A	14.308	-3.93531	-15.2984
B7H15_14210	hypothetical protein	25.3878	-2.92979	-7.62
B7H15_14215	L-glutamate gamma-semialdehyde dehydrogenase	6873.37	-4.57278	-23.7983
B7H15_14230	heavy metal translocating P-type ATPase	2020.81	-3.00161	-8.00895
B7H15_14235	copper chaperone CopZ	324.546	-3.63967	-12.4638
B7H15_14250	NAD(P)/FAD-dependent oxidoreductase	1675.48	-2.65726	-6.30834
B7H15_14255	phytoene/squalene synthase family protein	846.771	-2.83506	-7.1357
B7H15_14260	4,4\\'-diaponeurosporenoate glycosyltransferase	1148.52	-2.99092	-7.94981
B7H15_14265	NAD(P)/FAD-dependent oxidoreductase	1654.79	-3.04137	-8.23274
B7H15_14270	glycosyl-4,4\\'-diaponeurosporenoate acyltransferase	522.269	-3.07186	-8.40859
B7H15_14370	hypothetical protein	87.2192	-3.02001	-8.11174
B7H15_14375	DUF4176 domain-containing protein	73.8765	-4.06249	-16.7083
B7H15_14380	hypothetical protein	68.2012	-4.50091	-22.6417
B7H15_14385	TIGR04197 family type VII secretion effector	56.7782	-3.81211	-14.0462
B7H15_14420	hypothetical protein	2.28395	-2.86328	-7.27668
B7H15_14585	glutathione peroxidase	86.5162	-1.82125	-3.53387
B7H15_14590	hypothetical protein	21.612	-2.65671	-6.30591
B7H15_14595	hypothetical protein	19.847	-2.49566	-5.63987
B7H15_14600	hypothetical protein	2.16961	-3.51244	-11.4117
B7H15_14605	ABC transporter permease	353.495	-1.10214	-2.14674
B7H15_14610	ABC transporter ATP-binding protein	107.27	-1.40498	-2.64814
B7H15_14695	immunodominant staphylococcal antigen IsaB	1380.97	-2.87746	-7.34857
B7H15_14700	hypothetical protein	104.036	-2.22039	-4.66019
B7H15_14705	BglG family transcription antiterminator	149.502	-2.04845	-4.13662
B7H15_14710	PTS fructose transporter subunit IIABC	326.522	-2.00104	-4.00288
B7H15_14715	mannose-6-phosphate isomerase, class I	216.479	-1.34979	-2.54875
B7H15_14725	amidase domain-containing protein	3483.74	-2.7077	-6.53281
B7H15_14755	accessory Sec system protein Asp3	281.622	-1.79794	-3.47723
B7H15_14760	accessory Sec system protein Asp2	425.321	-2.06042	-4.17109
B7H15_14765	accessory Sec system protein Asp1	419.211	-2.77664	-6.85254
B7H15_14770	accessory Sec system protein translocase subunit SecY2	231.831	-3.13089	-8.75978
B7H15_14775	serine-rich repeat glycoprotein adhesin SasA	13590.6	-3.91869	-15.1232
B7H15_14780	flavin reductase family protein	373.949	-2.34526	-5.08152
B7H15_14825	capsular polysaccharide biosynthesis protein CapA	9.93125	-1.37937	-2.60155
B7H15_14830	ica operon transcriptional regulator IcaR	1330.21	-3.96875	-15.6572
B7H15_14855	hypothetical protein	34.9487	-7.11511	-138.632
B7H15_14860	hypothetical protein	899.425	-8.58389	-383.716
B7H15_14865	YSIRK domain-containing triacylglycerol lipase Lip1	34529.2	-9.23733	-603.551
B7H15_14955	SMP-30/gluconolactonase/LRE family protein	282.036	-1.99182	-3.97738
B7H15_14985	anion permease	915.545	-2.10886	-4.31352
B7H15_15000	HoxN/HupN/NixA family nickel/cobalt transporter	420.259	-1.19811	-2.29439
B7H15_15050	cold-shock protein	2939.22	-2.42059	-5.35391

## Sheet: Feuil2
Short name UID	Function	baseMean	log2fold	Fold change
B7H15_00055	AzlC family ABC transporter permease	156.3	1.36685	2.57907
B7H15_00060	AzlD domain-containing protein	83.2847	1.54703	2.92214
B7H15_00090	hypothetical protein	15.2673	2.00633	4.01759
B7H15_00095	adenylosuccinate synthase	921.653	2.5138	5.71121
B7H15_00165	glycerophosphoryl diester phosphodiesterase	662.591	1.26601	2.40496
B7H15_00240	MBL fold metallo-hydrolase	80.3067	1.18787	2.27816
B7H15_00285	hypothetical protein	229.12	1.58432	2.99867
B7H15_00290	GNAT family N-acetyltransferase	287.339	1.35226	2.55312
B7H15_00460	persulfide response sulfurtransferase CstA	88.4898	2.92512	7.59535
B7H15_00465	persulfide dioxygenase-sulfurtransferase CstB	176.572	2.32255	5.00214
B7H15_00475	FAD-dependent pyridine nucleotide-disulfide oxidoreductase	584.181	1.13896	2.20222
B7H15_00590	Na/Pi cotransporter family protein	3985.14	2.60888	6.10028
B7H15_00595	oleate hydratase	466.684	1.1362	2.19802
B7H15_00745	superoxide dismutase	697.65	1.69008	3.22675
B7H15_00880	type 8 capsular polysaccharide synthesis protein Cap8F	83.7911	1.22793	2.3423
B7H15_00885	type 8 capsular polysaccharide synthesis protein Cap8G	108.003	1.08705	2.12439
B7H15_00910	type 8 capsular polysaccharide synthesis protein Cap8L	124.429	1.12227	2.17689
B7H15_00915	type 8 capsular polysaccharide synthesis protein Cap8M	99.6314	1.66006	3.16029
B7H15_00920	capsular polysaccharide type 5/8 biosynthesis epimerase CapN	167.609	1.57425	2.97781
B7H15_00925	type 8 capsular polysaccharide synthesis protein Cap8O	249.721	1.68559	3.21671
B7H15_00930	type 8 capsular polysaccharide synthesis protein Cap8P	315.902	1.17032	2.25061
B7H15_01135	FMN-dependent NADH-azoreductase	1536.17	3.31486	9.95111
B7H15_01140	M23 family metallopeptidase	84.4311	2.92608	7.60042
B7H15_01220	glycerophosphoryl diester phosphodiesterase membrane domain-containing protein	216.658	1.7769	3.4269
B7H15_01340	zinc-binding dehydrogenase	41.4905	1.27643	2.42239
B7H15_01370	CDP-glycerol--glycerophosphate glycerophosphotransferase	1001.55	2.569	5.93397
B7H15_01390	poly(ribitol-phosphate) beta-N-acetylglucosaminyltransferase	8260.09	1.10922	2.15728
B7H15_01430	glucose PTS transporter subunit IIA	70.3365	1.95947	3.8892
B7H15_01435	6-phospho-beta-glucosidase	153.335	1.44035	2.71387
B7H15_01500	glycine-glycine endopeptidase LytM	1534.71	3.06544	8.37124
B7H15_01645	TIGR01741 family protein	178.003	1.15059	2.22005
B7H15_01650	antitoxin YezG family protein	154.892	1.63493	3.10572
B7H15_01705	ABC transporter ATP-binding protein	1836.85	1.04298	2.06048
B7H15_01860	VOC family protein	992.532	1.95195	3.86896
B7H15_01865	LLM class flavin-dependent oxidoreductase	2010.81	2.33268	5.03739
B7H15_01870	NAD(P)H-dependent oxidoreductase	693.288	2.15906	4.46625
B7H15_01885	GNAT family N-acetyltransferase	238.473	1.00975	2.01356
B7H15_01890	EfeM/EfeO family lipoprotein	31.5521	1.31966	2.49607
B7H15_01895	deferrochelatase/peroxidase EfeB	57.5783	1.12877	2.18672
B7H15_01905	twin-arginine translocase subunit TatC	230.04	1.15248	2.22295
B7H15_01910	twin-arginine translocase TatA/TatE family subunit	179.173	2.60767	6.09519
B7H15_01915	DUF1398 family protein	230.768	3.71022	13.0884
B7H15_01940	low temperature requirement protein A	199.387	1.41208	2.6612
B7H15_01985	mechanosensitive ion channel family protein	307.697	1.08983	2.1285
B7H15_01990	DUF951 domain-containing protein	198.553	1.34501	2.54032
B7H15_02000	hypothetical protein	116.821	1.75994	3.38684
B7H15_02045	YxeA family protein	7.15543	2.36884	5.16526
B7H15_02055	helix-turn-helix domain-containing protein	711.591	1.69972	3.24839
B7H15_02180	DUF1304 domain-containing protein	483.351	1.11728	2.16938
B7H15_02185	SDR family oxidoreductase	793.922	1.08689	2.12415
B7H15_02195	superantigen-like protein SSL2	24.608	1.18419	2.27235
B7H15_02230	hypothetical protein	1.84412	3.50604	11.3612
B7H15_02245	superantigen-like protein SSL9	18.4164	1.16074	2.23573
B7H15_02320	tandem-type lipoprotein Lpl8	70.6065	1.29005	2.44537
B7H15_02325	tandem-type lipoprotein Lpl9	122.166	1.22173	2.33227
B7H15_02405	sodium-dependent transporter	88.3418	1.1963	2.29151
B7H15_02440	hypothetical protein	304.829	1.51311	2.85425
B7H15_02455	YibE/F family protein	522.268	1.33889	2.52957
B7H15_02460	YibE/F family protein	564.975	1.97611	3.9343
B7H15_02470	glutamate synthase large subunit	4081.92	4.6239	24.6565
B7H15_02475	glutamate synthase subunit beta	1876.55	4.11165	17.2874
B7H15_02505	hypothetical protein	5.13145	2.48318	5.59128
B7H15_02515	DNA polymerase III subunit gamma/tau	1917.2	1.28647	2.43931
B7H15_02560	dTMP kinase	278.659	1.0787	2.11214
B7H15_02610	ribonuclease M5	450.996	1.77597	3.42468
B7H15_02615	16S rRNA (adenine(1518)-N(6)/adenine(1519)-N(6))-dimethyltransferase RsmA	516.459	1.29863	2.45995
B7H15_02695	septum formation initiator family protein	529.724	1.1535	2.22453
B7H15_02720	Hsp33 family molecular chaperone HslO	577.51	1.16194	2.23758
B7H15_02855	CtsR family transcriptional regulator	1099.76	1.53074	2.88934
B7H15_02860	UvrB/UvrC motif-containing protein	1580.62	1.72895	3.31487
B7H15_02865	protein arginine kinase	2775.06	1.45303	2.73783
B7H15_02870	ATP-dependent Clp protease ATP-binding subunit	9030.69	1.11331	2.16342
B7H15_02950	50S ribosomal protein L10	1850.46	1.56552	2.95984
B7H15_02955	50S ribosomal protein L7/L12	1413.59	1.13785	2.20053
B7H15_03000	amidohydrolase	1037.48	2.65689	6.3067
B7H15_03010	protein deglycase HchA	15095.4	1.89931	3.73034
B7H15_03055	Cof-type HAD-IIB family hydrolase	1978.63	1.09609	2.13774
B7H15_03115	3-hexulose-6-phosphate synthase	6018.31	2.72954	6.63246
B7H15_03120	6-phospho-3-hexuloisomerase	6109.61	2.84399	7.18002
B7H15_03125	HAD family hydrolase	90.7704	1.51952	2.86695
B7H15_03135	hypothetical protein	440.723	4.17098	18.0132
B7H15_03160	protein VraX	706.734	1.66417	3.16931
B7H15_03185	APC family permease	4183.81	1.17745	2.26176
B7H15_03245	Rrf2 family transcriptional regulator	26.4814	1.16466	2.2418
B7H15_03335	aldo/keto reductase	851.245	2.06981	4.19831
B7H15_03425	alpha/beta hydrolase	1586.37	1.11858	2.17133
B7H15_03660	membrane protein	2352.52	1.15273	2.22335
B7H15_03665	alpha/beta hydrolase	374.571	2.12522	4.36268
B7H15_03670	hypothetical protein	34.0196	1.89962	3.73114
B7H15_03785	GNAT family N-acetyltransferase	77.03	2.22291	4.66834
B7H15_03790	hypothetical protein	184.484	1.00469	2.00651
B7H15_03820	undecaprenyl-diphosphate phosphatase	1217.51	1.67621	3.19588
B7H15_03865	hypothetical protein	377.594	2.16729	4.49177
B7H15_03870	DUF1361 domain-containing protein	504.398	2.22293	4.66842
B7H15_03895	DeoR/GlpR family DNA-binding transcription regulator	1014.13	3.77642	13.703
B7H15_03990	allophanate hydrolase subunit 1	405.041	1.16701	2.24546
B7H15_04020	ABC transporter permease/substrate-binding protein	2350.67	1.04371	2.06153
B7H15_04025	histidinol-phosphate transaminase	233.477	2.18607	4.55064
B7H15_04035	5\\'-3\\'-deoxyribonucleotidase	446.712	1.61609	3.06543
B7H15_04040	hypothetical protein	82.651	1.23776	2.35832
B7H15_04155	bacillithiol system redox-active protein YtxJ	849.741	1.61116	3.05498
B7H15_04185	undecaprenyl/decaprenyl-phosphate alpha-N-acetylglucosaminyl 1-phosphate transferase	638.708	1.01179	2.01641
B7H15_04215	preprotein translocase subunit SecA	5733.09	1.05156	2.07276
B7H15_04220	hypothetical protein	16.7757	2.44192	5.43363
B7H15_04225	peptide chain release factor 2	937.084	1.80439	3.49282
B7H15_04230	hypothetical protein	5.34611	3.34994	10.1961
B7H15_04235	CHAP domain-containing protein	77.5907	1.33933	2.53035
B7H15_04240	HD domain-containing protein	489.422	2.16617	4.48832
B7H15_04245	CsbA family protein	171.377	1.57664	2.98275
B7H15_04335	hypothetical protein	6.78576	1.66024	3.16069
B7H15_04340	sugar-binding transcriptional regulator	8625.14	1.51344	2.85489
B7H15_04345	type I glyceraldehyde-3-phosphate dehydrogenase	16972.2	2.04673	4.13169
B7H15_04355	triose-phosphate isomerase	6085.69	1.67144	3.18533
B7H15_04360	2,3-bisphosphoglycerate-independent phosphoglycerate mutase	9358	1.53792	2.90376
B7H15_04425	hypothetical protein	96.768	1.43539	2.70456
B7H15_04430	N-acetyltransferase	161.889	1.59052	3.01159
B7H15_04515	organic hydroperoxide resistance protein	3422.77	2.91095	7.52111
B7H15_04520	type I 3-dehydroquinate dehydratase	159.607	1.12365	2.17898
B7H15_04610	helix-turn-helix domain-containing protein	64.155	2.37325	5.18105
B7H15_04615	helix-turn-helix domain-containing protein	432.166	2.67321	6.37846
B7H15_04620	hypothetical protein	204.22	2.8568	7.24409
B7H15_04625	hypothetical protein	169.292	2.61049	6.10711
B7H15_04630	hypothetical protein	321.823	2.71658	6.57315
B7H15_04635	DUF1474 family protein	130.113	2.68398	6.42624
B7H15_04640	primase	1217.76	2.07311	4.20792
B7H15_04645	hypothetical protein	117.201	1.91485	3.77075
B7H15_04650	hypothetical protein	129.787	2.36076	5.1364
B7H15_04655	hypothetical protein	78.3574	1.66988	3.18189
B7H15_04660	phage capsid protein	855.233	1.78712	3.45126
B7H15_04665	hypothetical protein	163.736	1.94601	3.85308
B7H15_04670	terminase	10.9179	1.4952	2.81903
B7H15_04675	terminase small subunit	68.7554	1.96833	3.91314
B7H15_04780	DUF3055 domain-containing protein	179.337	1.85727	3.62321
B7H15_04800	hypothetical protein	7.80641	1.86849	3.65151
B7H15_04845	YuzB family protein	453.337	1.28768	2.44134
B7H15_04930	NADH-dependent flavin oxidoreductase	2167.99	3.25725	9.56158
B7H15_04970	glucose-6-phosphate isomerase	5892.75	1.0645	2.09145
B7H15_05005	YisL family protein	406.509	1.06346	2.08994
B7H15_05030	ATP-dependent chaperone ClpB	2528.64	2.35966	5.1325
B7H15_05070	ketoacyl-ACP synthase III	942.87	1.21012	2.31356
B7H15_05110	ABC transporter substrate-binding protein	17.6311	1.1713	2.25214
B7H15_05115	ABC transporter ATP-binding protein	12.9779	1.49701	2.82258
B7H15_05145	adaptor protein MecA	4064.22	1.16391	2.24063
B7H15_05185	GTP pyrophosphokinase family protein	779.149	1.13551	2.19697
B7H15_05190	NAD kinase	1606.39	1.07388	2.10509
B7H15_05195	RluA family pseudouridine synthase	811.385	1.25357	2.3843
B7H15_05200	magnesium transporter	884.31	1.40532	2.64877
B7H15_05205	monovalent cation:proton antiporter family protein	1546.99	1.13901	2.2023
B7H15_05210	enoyl-ACP reductase FabI	1992.8	1.01335	2.01859
B7H15_05245	UDP-N-acetylmuramoyl-L-alanyl-D-glutamate--L-lysine ligase	1214.57	1.16334	2.23976
B7H15_05250	YueH family protein	134.262	1.23847	2.35948
B7H15_05255	peptide chain release factor 3	1828.43	1.47345	2.77684
B7H15_05260	TerC family protein	412.277	1.76317	3.39442
B7H15_05305	YkvS family protein	304.547	1.12545	2.1817
B7H15_05310	CPBP family intramembrane metalloprotease	2026.53	1.03786	2.05318
B7H15_05360	DoxX family protein	167.36	1.81604	3.52114
B7H15_05455	GNAT family N-acetyltransferase	111.679	1.57157	2.97228
B7H15_05630	cytochrome ubiquinol oxidase subunit I	308.205	2.15291	4.44724
B7H15_05665	peptide deformylase	670.185	1.04714	2.06643
B7H15_05670	YkyA family protein	1685.67	1.63343	3.10249
B7H15_05815	glycerophosphodiester phosphodiesterase	765.872	1.28896	2.44353
B7H15_05825	hypothetical protein	353.544	1.02793	2.03909
B7H15_05830	16S rRNA (guanine(966)-N(2))-methyltransferase RsmD	442.482	1.10427	2.1499
B7H15_05835	pantetheine-phosphate adenylyltransferase	469.344	1.25347	2.38413
B7H15_05845	DUF177 domain-containing protein	2113.13	1.15773	2.23107
B7H15_05850	hypothetical protein	706.276	1.35359	2.55548
B7H15_05955	hypothetical protein	67.6259	1.61606	3.06536
B7H15_05985	XTP/dITP diphosphatase	1502.91	1.02882	2.04036
B7H15_06130	YjjG family noncanonical pyrimidine nucleotidase	777.827	1.28716	2.44048
B7H15_06140	bacillithiol biosynthesis cysteine-adding enzyme BshC	1400.08	1.81158	3.51026
B7H15_06160	penicillin-binding protein	2201.27	1.11741	2.16957
B7H15_06190	peptidoglycan editing factor PgeF	791.154	1.08924	2.12762
B7H15_06450	30S ribosomal protein S16	670.341	1.04726	2.0666
B7H15_06460	tRNA (guanosine(37)-N1)-methyltransferase TrmD	341.206	1.06727	2.09547
B7H15_06510	type I DNA topoisomerase	4266.87	3.0488	8.27522
B7H15_06515	methylenetetrahydrofolate--tRNA-(uracil(54)-C(5))-methyltransferase (FADH(2)-oxidizing) TrmFO	3357.67	2.96306	7.79779
B7H15_06580	RIP metalloprotease RseP	1273.16	1.57636	2.98217
B7H15_06585	proline--tRNA ligase	2390.39	1.55563	2.93962
B7H15_06700	CinA family nicotinamide mononucleotide deamidase-related protein	1161.91	1.21622	2.32338
B7H15_06705	recombinase RecA	4404.3	1.22187	2.33249
B7H15_06735	MTH1187 family thiamine-binding protein	116.296	1.0217	2.03031
B7H15_06740	tRNA (N6-isopentenyl adenosine(37)-C2)-methylthiotransferase MiaB	2186.58	1.14961	2.21854
B7H15_06745	RicAFT regulatory complex protein RicA family protein	809.792	1.08198	2.11694
B7H15_06750	energy coupling factor transporter S component ThiW	868.277	1.05316	2.07507
B7H15_06755	DNA mismatch repair protein MutS	1578.26	1.11447	2.16516
B7H15_06805	GTPase HflX	527.419	1.9	3.73214
B7H15_06810	aminotransferase class I/II-fold pyridoxal phosphate-dependent enzyme	599.654	2.17471	4.51496
B7H15_06960	thermonuclease family protein	64.5123	1.08873	2.12687
B7H15_07030	GMP reductase	315.011	1.0594	2.08406
B7H15_07035	hypothetical protein	11.843	2.33449	5.04372
B7H15_07050	hypothetical protein	219.523	4.68341	25.6949
B7H15_07055	DUF896 domain-containing protein	166.49	2.77685	6.85352
B7H15_07060	transketolase	13886.2	1.60705	3.04628
B7H15_07080	exonuclease SbcCD subunit D	213.822	1.03216	2.04509
B7H15_07135	DNA topoisomerase IV subunit B	1570.74	1.22797	2.34237
B7H15_07140	DNA topoisomerase IV subunit A	2318.85	1.43742	2.70836
B7H15_07145	hypothetical protein	124.416	1.27039	2.41226
B7H15_07150	alanine:cation symporter family protein	1424.43	1.1655	2.24312
B7H15_07190	Y-family DNA polymerase	631.664	2.31055	4.96071
B7H15_07235	tryptophan synthase subunit alpha	58.7884	1.28644	2.43926
B7H15_07265	ABC transporter ATP-binding protein	301.798	1.08118	2.11577
B7H15_07270	ABC transporter permease	268.627	1.46269	2.75623
B7H15_07330	ATP-binding cassette domain-containing protein	1817.47	2.22481	4.67449
B7H15_07335	hypothetical protein	393.683	2.38739	5.23209
B7H15_07425	nitric oxide reductase activation protein NorD	771.247	2.02423	4.06775
B7H15_07430	MoxR family ATPase	310.491	1.83967	3.57929
B7H15_07480	phosphatase PAP2 family protein	1132.16	1.88824	3.70182
B7H15_07485	undecaprenyldiphospho-muramoylpentapeptide beta-N-acetylglucosaminyltransferase	1237.26	2.59586	6.04551
B7H15_07490	GNAT family N-acetyltransferase	392.886	2.57051	5.9402
B7H15_07500	hypothetical protein	1296.94	1.07514	2.10693
B7H15_07505	PTS glucose transporter subunit IIA	2347.87	1.08603	2.12288
B7H15_07510	peptide-methionine (R)-S-oxide reductase MsrB	1618.57	1.00101	2.0014
B7H15_07655	hypothetical protein	420.606	1.31173	2.48239
B7H15_07660	endonuclease III	707.568	1.11272	2.16253
B7H15_07670	B7H15_07670	3320.93	1.07172	2.10194
B7H15_07705	DUF1405 domain-containing protein	298.725	1.33913	2.52999
B7H15_07710	YpiB family protein	396.761	1.21902	2.32788
B7H15_07730	chorismate synthase	630.062	1.07999	2.11402
B7H15_07795	hypothetical protein	59.859	1.08835	2.12631
B7H15_07805	asparaginase	832.028	2.31514	4.97652
B7H15_07810	YpdA family putative bacillithiol disulfide reductase	975.074	1.37259	2.58936
B7H15_07980	phage major capsid protein	20.4988	1.25769	2.39113
B7H15_07985	Clp protease ClpP	15.8709	1.15287	2.22356
B7H15_08050	hypothetical protein	40.9136	2.86489	7.2848
B7H15_08055	hypothetical protein	12.429	1.04779	2.06736
B7H15_08060	hypothetical protein	4.78121	2.54261	5.82642
B7H15_08110	DUF2815 family protein	6.5059	1.9644	3.90251
B7H15_08115	DUF2800 domain-containing protein	7.76881	2.16558	4.48648
B7H15_08120	hypothetical protein	1.85755	2.97	7.83534
B7H15_08140	DUF1270 domain-containing protein	7.80544	3.59256	12.0633
B7H15_08155	hypothetical protein	645.601	1.18151	2.26815
B7H15_08240	DUF309 domain-containing protein	142.496	1.47315	2.77627
B7H15_08260	aldo/keto reductase	2378.92	1.16386	2.24057
B7H15_08305	hypothetical protein	176.192	1.04285	2.06029
B7H15_08310	VOC family protein	995.572	1.05903	2.08353
B7H15_08330	aromatic acid exporter family protein	1597.79	1.44725	2.72688
B7H15_08335	BrxA/BrxB family bacilliredoxin	701.642	1.69135	3.22959
B7H15_08375	exodeoxyribonuclease VII small subunit	510.694	1.07747	2.11034
B7H15_08395	acetyl-CoA carboxylase biotin carboxylase subunit	2554.87	1.01171	2.0163
B7H15_08400	acetyl-CoA carboxylase biotin carboxyl carrier protein	1023.02	1.04505	2.06343
B7H15_08420	membrane protein	293.45	1.02817	2.03944
B7H15_08490	MBL fold metallo-hydrolase	1781.6	1.11982	2.1732
B7H15_08495	MTH1187 family thiamine-binding protein	653.56	1.07646	2.10885
B7H15_08530	superoxide dismutase	26318.9	1.11125	2.16032
B7H15_08550	deoxyribonuclease IV	1035.3	1.2422	2.3656
B7H15_08555	DEAD/DEAH box helicase	1245.2	1.44233	2.7176
B7H15_08560	Nif3-like dinuclear metal center hexameric protein	1178.29	1.47194	2.77395
B7H15_08565	tRNA (adenine(22)-N(1))-methyltransferase TrmK	418.251	1.8027	3.48873
B7H15_08590	glycine--tRNA ligase	4547.66	1.57141	2.97195
B7H15_08605	cytidine deaminase	799.905	1.00484	2.00672
B7H15_08645	tRNA (N(6)-L-threonylcarbamoyladenosine(37)-C(2))-methylthiotransferase MtaB	1761.37	1.38612	2.61374
B7H15_08655	50S ribosomal protein L11 methyltransferase	1411.09	2.04615	4.13001
B7H15_08660	molecular chaperone DnaJ	1439.41	2.0121	4.03369
B7H15_08665	molecular chaperone DnaK	7787.75	1.33735	2.52688
B7H15_08670	nucleotide exchange factor GrpE	1562.45	1.71924	3.29264
B7H15_08675	heat-inducible transcriptional repressor HrcA	2400.36	1.51056	2.84921
B7H15_08715	ComEA family DNA-binding protein	121.042	2.0135	4.03759
B7H15_08720	class I SAM-dependent methyltransferase	1451.94	1.238	2.35872
B7H15_08725	ribosome silencing factor	500.882	1.20666	2.30803
B7H15_08730	bis(5\\'-nucleosyl)-tetraphosphatase (symmetrical) YqeK	1106.98	1.38819	2.6175
B7H15_08735	nicotinate (nicotinamide) nucleotide adenylyltransferase	710.904	1.28514	2.43705
B7H15_08740	ribosome assembly RNA-binding protein YhbY	355.501	1.16451	2.24158
B7H15_08745	shikimate dehydrogenase	718.135	1.2957	2.45496
B7H15_08750	ribosome biogenesis GTPase YqeH	950.536	1.3604	2.56756
B7H15_08755	YqeG family HAD IIIA-type phosphatase	496.355	1.3127	2.48407
B7H15_08760	5\\'-methylthioadenosine/S-adenosylhomocysteine nucleosidase	492.652	1.27455	2.41923
B7H15_08810	transcription elongation factor GreA	1277.36	1.24032	2.36251
B7H15_08850	alanine--tRNA ligase	1612.52	1.36043	2.56761
B7H15_08865	hypothetical protein	28.4298	1.70243	3.25449
B7H15_08870	tRNA 2-thiouridine(34) synthase MnmA	2246.06	1.29574	2.45504
B7H15_08875	cysteine desulfurase	1726.99	1.41694	2.67019
B7H15_08880	LLM class flavin-dependent oxidoreductase	1001.63	1.50206	2.83247
B7H15_08930	N-acetylmuramoyl-L-alanine amidase	1650.29	1.13631	2.19818
B7H15_08950	single-stranded-DNA-specific exonuclease RecJ	776.402	1.10646	2.15316
B7H15_09020	hypothetical protein	242.637	2.07969	4.22716
B7H15_09025	DUF4930 family protein	216.268	2.32571	5.01311
B7H15_09080	glutamate-1-semialdehyde 2,1-aminomutase	2018.41	1.04899	2.06908
B7H15_09090	uroporphyrinogen-III synthase	316.727	1.6886	3.22344
B7H15_09095	hydroxymethylbilane synthase	1059.68	1.23267	2.35001
B7H15_09100	cytochrome c biogenesis protein	1512.68	1.4181	2.67233
B7H15_09110	B7H15_09110	315.062	1.38793	2.61703
B7H15_09115	ATP-dependent Clp protease ATP-binding subunit ClpX	7590.93	2.27533	4.84107
B7H15_09120	trigger factor	7019.24	1.05642	2.07976
B7H15_09125	hypothetical protein	84.0457	1.08303	2.11848
B7H15_09175	primosomal protein DnaI	3179.47	1.31403	2.48635
B7H15_09180	replication initiation and membrane attachment family protein	4060.7	1.40966	2.65675
B7H15_09185	transcriptional regulator NrdR	1413.56	1.17122	2.25202
B7H15_09200	bifunctional DNA-formamidopyrimidine glycosylase/DNA-(apurinic or apyrimidinic site) lyase	1348.46	1.07635	2.10869
B7H15_09260	acetyl-CoA carboxylase carboxyltransferase subunit alpha	1422.49	1.38321	2.60848
B7H15_09265	acetyl-CoA carboxylase, carboxyltransferase subunit beta	1374.45	1.09113	2.1304
B7H15_09335	TSUP family transporter	174.358	1.37855	2.60006
B7H15_09340	tRNA 4-thiouridine(8) synthase ThiI	330.656	2.23783	4.71686
B7H15_09345	cysteine desulfurase	224.308	1.98346	3.95441
B7H15_09360	GAF domain-containing protein	370.108	1.60272	3.03716
B7H15_09365	30S ribosomal protein S4	3427.79	1.12631	2.183
B7H15_09370	hypothetical protein	140.056	1.08649	2.12356
B7H15_09375	glycerophosphoryl diester phosphodiesterase	414.606	1.30403	2.46918
B7H15_09385	alanine--glyoxylate aminotransferase family protein	519.971	1.22414	2.33616
B7H15_09400	HAD family hydrolase	1010.14	1.23742	2.35777
B7H15_09565	rRNA pseudouridine synthase	1380	2.22763	4.68364
B7H15_09570	polysaccharide biosynthesis protein	1496.52	1.52265	2.87318
B7H15_09585	rhodanese-like domain-containing protein	329.176	1.30357	2.46839
B7H15_09590	leucine--tRNA ligase	1748.01	1.21775	2.32584
B7H15_09600	TIGR01212 family radical SAM protein	971.321	2.72857	6.62797
B7H15_09605	class I SAM-dependent methyltransferase	600.863	2.57914	5.97583
B7H15_09615	IS5/IS1182 family transposase	14.7098	1.52372	2.87531
B7H15_09665	metalloregulator ArsR/SmtB family transcription factor	66.464	1.30868	2.47714
B7H15_09670	arsenite efflux transporter membrane subunit ArsB	203.925	1.06328	2.08968
B7H15_09675	arsenate reductase (thioredoxin)	86.4546	1.05982	2.08467
B7H15_09690	RNA polymerase sigma factor SigS	124.86	1.9919	3.9776
B7H15_09695	competence protein ComK	274.889	1.34176	2.5346
B7H15_09700	hypothetical protein	222.452	1.22749	2.34159
B7H15_09720	fluoride efflux transporter CrcB	59.0158	2.43893	5.42238
B7H15_09725	CrcB family protein	64.5651	1.70519	3.26073
B7H15_09845	hypothetical protein	8.60442	1.79297	3.46528
B7H15_09850	hypothetical protein	3.8956	2.15621	4.45742
B7H15_10100	foldase	2614.43	1.2876	2.44121
B7H15_10120	hypothetical protein	2.58269	2.16697	4.4908
B7H15_10125	hypothetical protein	6.77952	2.04554	4.12828
B7H15_10135	DUF445 domain-containing protein	591.612	1.74955	3.36255
B7H15_10140	helix-turn-helix transcriptional regulator	523.848	1.00521	2.00723
B7H15_10380	thioredoxin-dependent thiol peroxidase	833.641	1.08247	2.11767
B7H15_10395	hypothetical protein	30.6493	3.46224	11.0214
B7H15_10400	SAV1866 family putative multidrug efflux ABC transporter	712.152	2.39371	5.25507
B7H15_10445	monofunctional peptidoglycan glycosyltransferase SgtB	1035.85	1.05435	2.07678
B7H15_10450	type 1 glutamine amidotransferase	8659.2	1.76068	3.38858
B7H15_10465	acyl-CoA thioesterase	1286.05	1.22905	2.34413
B7H15_10470	aminopeptidase	1930.53	1.23252	2.34977
B7H15_10480	low molecular weight phosphotyrosine protein phosphatase	1765.66	1.0963	2.13805
B7H15_10530	hypothetical protein	46.3495	1.6329	3.10136
B7H15_10540	type 1 glutamine amidotransferase	1016.13	2.06328	4.17935
B7H15_10545	lipid II isoglutaminyl synthase subunit MurT	1228.51	1.38932	2.61955
B7H15_10560	3\\'-5\\' exonuclease	546.526	1.45257	2.73695
B7H15_10620	B7H15_10620	1970.76	1.49907	2.8266
B7H15_10625	DNA helicase PcrA	1660.5	1.67756	3.19886
B7H15_10630	heptaprenylglyceryl phosphate synthase	339.97	1.17976	2.26539
B7H15_10705	cysteine hydrolase	1666.34	1.1937	2.28739
B7H15_10730	YolD-like family protein	207.22	1.21134	2.31553
B7H15_10860	amidase	138.744	2.09762	4.28002
B7H15_10870	staphylokinase	756.379	2.67457	6.38446
B7H15_10875	CHAP domain-containing protein	320.564	3.30583	9.88904
B7H15_10880	phage holin	148.9	2.73477	6.65654
B7H15_10895	DUF2951 domain-containing protein	166.881	3.81482	14.0727
B7H15_10900	hypothetical protein	217.201	3.54554	11.6765
B7H15_10905	hypothetical protein	54.5607	3.59347	12.071
B7H15_10910	hypothetical protein	1385.76	2.06032	4.17078
B7H15_10915	phage tail family protein	381.675	2.0571	4.16148
B7H15_10920	phage tail tape measure protein	1062.93	1.86729	3.64848
B7H15_10925	hypothetical protein	182.401	1.82397	3.54055
B7H15_10930	Ig-like domain-containing protein	110.299	1.874	3.66548
B7H15_10935	phage tail protein	84.4299	1.54002	2.90798
B7H15_10940	hypothetical protein	207.265	1.97015	3.91809
B7H15_10945	HK97 gp10 family phage protein	264.474	2.1284	4.37233
B7H15_10950	head-tail adaptor protein	99.5379	1.83477	3.56715
B7H15_10955	phage head-tail adapter protein	67.4419	1.7152	3.28342
B7H15_10960	hypothetical protein	140.345	2.23333	4.70219
B7H15_10965	phage major capsid protein	817.832	2.39118	5.24588
B7H15_10970	Clp protease ClpP	477.999	2.80557	6.99137
B7H15_10975	phage portal protein	572.015	3.05323	8.30067
B7H15_10980	terminase large subunit	768.529	3.77762	13.7144
B7H15_10985	hypothetical protein	117.949	3.4506	10.9329
B7H15_10990	HNH endonuclease	165.05	3.62632	12.349
B7H15_10995	hypothetical protein	2167.91	4.26907	19.2805
B7H15_11000	DUF1514 family protein	206.871	3.68601	12.8706
B7H15_11005	transcriptional activator RinB	712.322	4.08223	16.9385
B7H15_11010	hypothetical protein	2562.52	4.36855	20.6568
B7H15_11015	DUF1381 domain-containing protein	439.697	3.67636	12.7848
B7H15_11020	hypothetical protein	490.467	4.10697	17.2314
B7H15_11025	dUTP pyrophosphatase	1234.18	3.99434	15.9374
B7H15_11030	hypothetical protein	251.171	3.52497	11.5112
B7H15_11035	DUF1024 family protein	77.6871	3.18702	9.10728
B7H15_11040	hypothetical protein	117.337	3.40266	10.5755
B7H15_11045	phi PVL orf 51-like protein	649.777	3.74881	13.4433
B7H15_11050	hypothetical protein	411.981	3.6837	12.8501
B7H15_11055	RusA family crossover junction endodeoxyribonuclease	782.385	4.0611	16.6922
B7H15_11060	hypothetical protein	838.079	4.32611	20.058
B7H15_11065	DnaD domain-containing protein	2685.5	4.3391	20.2394
B7H15_11070	single-stranded DNA-binding protein	1943.43	4.31247	19.8693
B7H15_11075	MBL fold metallo-hydrolase	2624.25	4.44036	21.7112
B7H15_11080	recombinase RecT	4226.83	4.26527	19.2298
B7H15_11085	AAA family ATPase	7031.88	4.14073	17.6394
B7H15_11090	hypothetical protein	1351.15	4.38062	20.8304
B7H15_11095	DUF1108 family protein	1148.24	4.07083	16.8051
B7H15_11100	DUF2482 family protein	883.507	4.37082	20.6894
B7H15_11105	DUF1270 domain-containing protein	201.596	5.00626	32.1391
B7H15_11110	DUF771 domain-containing protein	2794.66	4.81445	28.1381
B7H15_11115	hypothetical protein	2451.91	1.7457	3.35358
B7H15_11120	phage antirepressor KilAC domain-containing protein	7052.48	4.46837	22.1368
B7H15_11125	hypothetical protein	3703.56	4.80478	27.9501
B7H15_11130	DUF2829 domain-containing protein	2916.89	4.51474	22.8598
B7H15_11135	helix-turn-helix domain-containing protein	2144.02	5.04084	32.9188
B7H15_11140	transcriptional regulator	11.1283	4.41929	21.3963
B7H15_11170	site-specific integrase	483.915	2.65161	6.28368
B7H15_11190	ArgE/DapE family deacylase	2606.18	1.37061	2.58579
B7H15_11230	terminase small subunit	20.3411	1.44798	2.72825
B7H15_11235	hypothetical protein	8.16176	1.85262	3.61155
B7H15_11240	site-specific integrase	10.1572	1.8424	3.58607
B7H15_11245	chaperonin GroEL	5299.68	1.34162	2.53435
B7H15_11250	co-chaperone GroES	708.806	1.54908	2.92631
B7H15_11265	nitroreductase family protein	738.276	1.42806	2.69085
B7H15_11395	ACT domain-containing protein	34.3786	1.33982	2.53121
B7H15_11455	hypothetical protein	19.6023	2.36887	5.16538
B7H15_11460	SprT family protein	444.036	2.15851	4.46454
B7H15_11465	RNA-binding transcriptional accessory protein	1399.65	1.8153	3.51932
B7H15_11505	alanine racemase	1986.28	1.41092	2.65906
B7H15_11510	holo-ACP synthase	617.634	1.42567	2.6864
B7H15_11515	PH domain-containing protein	523.112	1.25596	2.38826
B7H15_11520	PH domain-containing protein	1547.99	1.20211	2.30076
B7H15_11560	DEAD/DEAH box helicase	3399.38	1.6728	3.18833
B7H15_11565	UDP-N-acetylmuramoyl-tripeptide--D-alanyl-D-alanine ligase	2857.42	1.81016	3.50682
B7H15_11570	D-alanine--D-alanine ligase	1630.37	1.40831	2.65426
B7H15_11585	heavy-metal-associated domain-containing protein	128.742	2.24847	4.75179
B7H15_11590	copper-sensing transcriptional repressor CsoR	96.6699	1.61288	3.05862
B7H15_11645	lytic transglycosylase SceD	8332.74	9.0144	517.136
B7H15_11660	3-hydroxyacyl-ACP dehydratase FabZ	1722.04	1.1039	2.14936
B7H15_11785	aldehyde dehydrogenase family protein	11298	1.23001	2.34568
B7H15_11805	DUF2529 domain-containing protein	411.12	1.50954	2.84719
B7H15_11810	CTP synthase	1445.05	1.37973	2.6022
B7H15_11835	hypothetical protein	633.748	1.32193	2.5
B7H15_11840	M20 family metallopeptidase	459.717	1.27286	2.4164
B7H15_11880	thiol-disulfide oxidoreductase DCC family protein	495.064	1.09308	2.13329
B7H15_11900	SDR family oxidoreductase	2097.88	1.28301	2.43346
B7H15_11960	BglG family transcription antiterminator	1606.22	1.87075	3.65723
B7H15_11965	PTS sugar transporter subunit IIA	1047.22	2.22627	4.67923
B7H15_11970	mannitol-1-phosphate 5-dehydrogenase	1758.57	1.6386	3.11364
B7H15_12100	YjiH family protein	213.688	1.32986	2.51379
B7H15_12170	zinc-binding alcohol dehydrogenase family protein	807.714	1.65014	3.13864
B7H15_12175	NADP-dependent oxidoreductase	2949.47	1.44976	2.73162
B7H15_12180	alpha/beta hydrolase	555.076	1.36078	2.56825
B7H15_12225	hypothetical protein	48.6403	2.42831	5.38264
B7H15_12230	hypothetical protein	22.8925	2.11001	4.31694
B7H15_12235	hypothetical protein	8.14871	4.02845	16.3186
B7H15_12240	aldo/keto reductase	931.096	1.57667	2.9828
B7H15_12245	MerR family transcriptional regulator	147.113	1.326	2.50706
B7H15_12275	acetolactate decarboxylase	1429.4	5.1932	36.5854
B7H15_12280	acetolactate synthase AlsS	3838.26	4.83515	28.5446
B7H15_12330	tRNA pseudouridine(38-40) synthase TruA	447.553	1.30033	2.46285
B7H15_12335	energy-coupling factor transporter transmembrane protein EcfT	416.532	1.15573	2.22796
B7H15_12340	energy-coupling factor transporter ATPase	559.402	1.05413	2.07646
B7H15_12345	energy-coupling factor transporter ATPase	363.38	1.00737	2.01025
B7H15_12410	50S ribosomal protein L6	2085.32	1.00485	2.00673
B7H15_12415	30S ribosomal protein S8	1845.27	1.19313	2.28649
B7H15_12420	B7H15_12420	736.326	1.11592	2.16733
B7H15_12425	50S ribosomal protein L5	2428.51	1.25969	2.39445
B7H15_12430	50S ribosomal protein L24	1723.05	1.37593	2.59536
B7H15_12435	50S ribosomal protein L14	1830.09	1.26477	2.4029
B7H15_12440	30S ribosomal protein S17	1145.72	1.20408	2.3039
B7H15_12445	50S ribosomal protein L29	701.911	1.32013	2.49688
B7H15_12450	50S ribosomal protein L16	2105.94	1.29933	2.46114
B7H15_12455	30S ribosomal protein S3	2776.75	1.21654	2.32388
B7H15_12460	50S ribosomal protein L22	1467.12	1.11213	2.16165
B7H15_12465	30S ribosomal protein S19	898.185	1.05193	2.0733
B7H15_12470	50S ribosomal protein L2	4801.03	1.2379	2.35854
B7H15_12475	50S ribosomal protein L23	1267.27	1.22174	2.33229
B7H15_12480	50S ribosomal protein L4	2870.52	1.0446	2.06279
B7H15_12485	50S ribosomal protein L3	3254.71	1.14902	2.21764
B7H15_12520	glucose uptake protein GlcU	750.381	2.30254	4.93326
B7H15_12525	hypothetical protein	169.675	1.69414	3.23585
B7H15_12530	AEC family transporter	297.344	1.84184	3.58468
B7H15_12550	lipid II:glycine glycyltransferase	1880.8	1.47319	2.77636
B7H15_12555	hypothetical protein	243.32	1.41554	2.6676
B7H15_12560	VOC family protein	530.002	1.25647	2.38911
B7H15_12580	hypothetical protein	29.1997	2.30895	4.95523
B7H15_12585	nitrogen fixation protein NifR	24.418	2.298	4.91775
B7H15_12595	GTP 3\\',8-cyclase MoaA	1346.88	1.56888	2.96675
B7H15_12600	molybdenum cofactor guanylyltransferase MobA	601.392	1.5087	2.84554
B7H15_12605	molybdopterin converting factor subunit 1	134.441	1.45209	2.73603
B7H15_12610	molybdenum cofactor biosynthesis protein MoaE	430.269	1.21489	2.32123
B7H15_12655	formate dehydrogenase accessory sulfurtransferase FdhD	1174.77	1.02947	2.04127
B7H15_12775	CHAP domain-containing protein	7461.08	2.38021	5.20614
B7H15_12790	FAD-dependent monooxygenase	561.01	1.58586	3.00186
B7H15_12900	Na+/H+ antiporter NhaC family protein	497.802	1.48802	2.80503
B7H15_12905	hypothetical protein	216.342	1.11001	2.15847
B7H15_12910	SDR family oxidoreductase	3982.23	1.06086	2.08617
B7H15_13005	type 2 isopentenyl-diphosphate Delta-isomerase	1061.3	1.06153	2.08714
B7H15_13090	ABC transporter ATP-binding protein	23.1021	2.04386	4.12348
B7H15_13095	ABC transporter permease	25.045	2.07725	4.22001
B7H15_13105	heme sensor histidine kinase HssS	594.005	1.17084	2.25142
B7H15_13145	oxidoreductase	824.492	1.87277	3.66234
B7H15_13175	YhgE/Pip domain-containing protein	55.7084	1.26719	2.40693
B7H15_13185	magnesium transporter CorA family protein	1318.03	1.83957	3.57903
B7H15_13205	pyridoxamine 5\\'-phosphate oxidase family protein	4642.8	1.32115	2.49865
B7H15_13230	Hsp20/alpha crystallin family protein	1322.67	1.81837	3.52684
B7H15_13310	GNAT family N-acetyltransferase	95.4253	2.35739	5.12444
B7H15_13320	hypothetical protein	46.5319	1.95719	3.88304
B7H15_13325	SRPBCC domain-containing protein	120.099	2.4943	5.63456
B7H15_13340	type II toxin-antitoxin system Phd/YefM family antitoxin	441.542	1.11569	2.16698
B7H15_13365	amino acid ABC transporter ATP-binding protein	7555.54	1.35061	2.5502
B7H15_13370	amino acid ABC transporter permease	6422.87	1.13896	2.20222
B7H15_13375	transporter substrate-binding domain-containing protein	4300.62	1.24057	2.36292
B7H15_13400	cation diffusion facilitator family transporter	431.597	1.2207	2.3306
B7H15_13465	dethiobiotin synthase	5.6522	1.80957	3.50538
B7H15_13570	NAD(P)-dependent oxidoreductase	920.236	2.5801	5.9798
B7H15_13575	hypothetical protein	50.7124	1.26659	2.40593
B7H15_13580	2-dehydropantoate 2-reductase	372.073	1.48751	2.80405
B7H15_13585	MFS transporter	1416.28	2.15578	4.45609
B7H15_13665	Txe/YoeB family addiction module toxin	752.576	2.42638	5.37542
B7H15_13670	type II toxin-antitoxin system Phd/YefM family antitoxin	461.865	2.0325	4.09112
B7H15_13740	hypothetical protein	783.724	1.33922	2.53015
B7H15_13745	short-chain dehydrogenase	1416.67	1.57044	2.96995
B7H15_13805	hypothetical protein	23.2673	1.39129	2.62312
B7H15_13945	DUF2188 domain-containing protein	2154.89	1.93381	3.82063
B7H15_14015	MarR family transcriptional regulator	94.3995	1.01417	2.01974
B7H15_14020	N-acetyltransferase	373.775	2.16728	4.49177
B7H15_14025	VOC family protein	1331.77	2.05209	4.14705
B7H15_14030	NAD(P)H-dependent oxidoreductase	2978.2	1.34126	2.53373
B7H15_14105	thioredoxin family protein	452.384	1.04975	2.07018
B7H15_14115	glucose-specific PTS transporter subunit IIBC	469.257	1.07654	2.10897
B7H15_14130	holin-like murein hydrolase modulator CidA	581.528	4.84175	28.6756
B7H15_14145	CHAP domain-containing protein	425.466	1.53649	2.90088
B7H15_14200	fatty acid efflux MMPL transporter FarE	91.1429	1.88215	3.68625
B7H15_14225	cell wall inhibition responsive protein CwrA	157.128	4.16883	17.9863
B7H15_14290	lytic transglycosylase IsaA	19343.8	1.07524	2.10707
B7H15_14320	VOC family protein	82.949	1.58329	2.99652
B7H15_14325	NmrA/HSCARG family protein	119.378	1.75647	3.3787
B7H15_14330	DUF2316 family protein	31.096	2.00475	4.0132
B7H15_14405	epoxyqueuosine reductase QueH	135.246	1.32389	2.5034
B7H15_14425	CocE/NonD family hydrolase	203.736	1.57183	2.97282
B7H15_14430	aspartate 1-decarboxylase	349.758	1.72407	3.30367
B7H15_14435	pantoate--beta-alanine ligase	945.24	1.96598	3.90679
B7H15_14440	3-methyl-2-oxobutanoate hydroxymethyltransferase	655.178	1.61752	3.06846
B7H15_14455	L-lactate dehydrogenase	649.251	1.17906	2.2643
B7H15_14480	fructose bisphosphate aldolase	7147.89	1.24363	2.36794
B7H15_14495	AMP-binding protein	6345.01	1.08913	2.12746
B7H15_14505	sterile alpha motif-like domain-containing protein	71.5155	1.45658	2.74457
B7H15_14510	choline dehydrogenase	683.367	1.17977	2.26541
B7H15_14515	betaine-aldehyde dehydrogenase	1044.94	1.70996	3.27152
B7H15_14525	GbsR/MarR family transcriptional regulator	202.956	1.47282	2.77564
B7H15_14530	MBL fold metallo-hydrolase	344.821	1.59315	3.01707
B7H15_14800	flavin reductase family protein	656.31	1.87275	3.6623
B7H15_14810	GNAT family N-acetyltransferase	36.8563	1.60528	3.04254
B7H15_14875	bifunctional phosphoribosyl-AMP cyclohydrolase/phosphoribosyl-ATP diphosphatase HisIE	61.1219	1.16783	2.24674
B7H15_14950	YceI family protein	4547.33	3.24947	9.51016
B7H15_14960	rhodanese-related sulfurtransferase	2017.78	3.20614	9.22875
B7H15_14965	pyroglutamyl-peptidase I	147.647	1.60952	3.05149
B7H15_14980	bacillithiol transferase BstA	665.612	1.01046	2.01455
B7H15_15035	hypothetical protein	35.9301	1.35135	2.55151
B7H15_15075	nucleoid occlusion protein	1175.18	1.15006	2.21923
B7H15_00005	chromosomal replication initiator protein DnaA	2198.52	-2.13229	-4.38413
B7H15_00040	histidine ammonia-lyase	440.611	-2.3404	-5.06442
B7H15_00045	hypothetical protein	714.784	-1.13855	-2.20159
B7H15_00050	serine--tRNA ligase	970.067	-1.24354	-2.3678
B7H15_00135	LPXTG-anchored adenosine synthase AdsA	406.516	-2.03958	-4.11126
B7H15_00140	23S rRNA (pseudouridine(1915)-N(3))-methyltransferase RlmH	124.876	-2.4331	-5.40051
B7H15_00175	PBP2a family beta-lactam-resistant peptidoglycan transpeptidase MecA	37687.6	-1.29173	-2.44822
B7H15_00180	beta-lactam sensor/signal transducer MecR1	8791.73	-1.68187	-3.20844
B7H15_00185	DUF3387 domain-containing protein	3375.23	-1.8983	-3.72774
B7H15_00190	IS5/IS1182 family transposase	104.241	-1.79384	-3.46736
B7H15_00195	DUF1643 domain-containing protein	9.33087	-1.67997	-3.20422
B7H15_00215	recombinase family protein	186.037	-1.88953	-3.70513
B7H15_00220	DUF927 domain-containing protein	98.8467	-1.2723	-2.41546
B7H15_00255	hypothetical protein	46.5291	-1.8758	-3.67006
B7H15_00260	HNH endonuclease	60.441	-1.65545	-3.15022
B7H15_00345	arginine-ornithine antiporter	118.22	-1.05451	-2.07702
B7H15_00360	universal stress protein	4150.94	-1.45562	-2.74274
B7H15_00370	IS6 family transposase	78.9759	-1.04444	-2.06256
B7H15_00380	IS110 family transposase	381.646	-2.1916	-4.56811
B7H15_00385	class I SAM-dependent methyltransferase	71.1149	-1.99113	-3.97549
B7H15_00415	copper-translocating P-type ATPase	3240.23	-4.43277	-21.5972
B7H15_00420	YdhK family protein	877.68	-4.88018	-29.4496
B7H15_00490	tRNA-dihydrouridine synthase	511.199	-1.22087	-2.33088
B7H15_00500	TfoX/Sxy family protein	77.8137	-1.19627	-2.29146
B7H15_00505	MFS transporter	179.09	-1.48821	-2.80541
B7H15_00540	hypothetical protein	193.546	-1.05966	-2.08444
B7H15_00615	L-lactate permease	2389.27	-1.21566	-2.32248
B7H15_00630	HTH-type transcriptional regulator SarS	352.123	-2.03525	-4.09893
B7H15_00640	staphyloferrin B ABC transporter permease subunit SirB	65.1097	-1.55175	-2.93173
B7H15_00645	staphyloferrin B ABC transporter substrate-binding protein SirA	253.249	-1.8538	-3.6145
B7H15_00700	hypothetical protein	71.9404	-1.75831	-3.38301
B7H15_00720	NAD-dependent epimerase/dehydratase family protein	20.6784	-1.40494	-2.64806
B7H15_00735	O-antigen ligase family protein	27.0512	-1.34246	-2.53583
B7H15_00750	cell-wall-anchored protein SasD	730.785	-1.63694	-3.11005
B7H15_00770	deoxyribose-phosphate aldolase	705.257	-1.79648	-3.47372
B7H15_00835	hypothetical protein	153.743	-1.2142	-2.32012
B7H15_00840	hypothetical protein	77.0442	-1.02931	-2.04104
B7H15_00935	staphylobilin-forming heme oxygenase IsdI	130.123	-1.92393	-3.79456
B7H15_00940	YbaN family protein	61.0416	-2.31448	-4.97427
B7H15_00945	aldehyde dehydrogenase family protein	4202.17	-5.13022	-35.0226
B7H15_00950	cation diffusion facilitator family transporter	765.121	-1.3749	-2.59351
B7H15_00955	hypothetical protein	196.379	-1.95296	-3.87168
B7H15_00965	ABC transporter ATP-binding protein	2843.95	-1.05078	-2.07165
B7H15_00970	ABC transporter substrate-binding protein	3389.35	-1.34806	-2.5457
B7H15_00975	ABC transporter permease	2528.86	-1.63177	-3.09894
B7H15_00980	acyl-CoA/acyl-ACP dehydrogenase	4004.02	-1.77023	-3.41109
B7H15_00985	DUF2294 domain-containing protein	5825.6	-2.01057	-4.02941
B7H15_00990	NAD-dependent formate dehydrogenase	13627.3	-4.63462	-24.8405
B7H15_00995	MFS transporter	2707.72	-3.05352	-8.30236
B7H15_01000	amino acid adenylation domain-containing protein	17457.4	-3.88622	-14.7866
B7H15_01005	4\\'-phosphopantetheinyl transferase superfamily protein	2679.06	-2.65631	-6.30419
B7H15_01010	YagU family protein	1070.53	-2.36592	-5.15483
B7H15_01015	acetylglutamate kinase	43.8823	-1.10959	-2.15784
B7H15_01025	N-acetyl-gamma-glutamyl-phosphate reductase	39.9512	-1.1207	-2.17452
B7H15_01035	branched-chain amino acid transport system II carrier protein	718.161	-1.74902	-3.36129
B7H15_01050	hypothetical protein	7.72969	-3.24975	-9.51202
B7H15_01055	glucose-specific PTS transporter subunit IIBC	1179.96	-2.70833	-6.53563
B7H15_01060	DUF871 domain-containing protein	3163.44	-8.29856	-314.859
B7H15_01065	N-acetylmuramic acid 6-phosphate etherase	1878.66	-7.76228	-217.11
B7H15_01070	PTS transporter subunit EIIC	2969.08	-6.63994	-99.7287
B7H15_01075	MurR/RpiR family transcriptional regulator	1637.57	-6.64272	-99.9214
B7H15_01080	hypothetical protein	43.6859	-1.56245	-2.95354
B7H15_01085	type I restriction endonuclease subunit R	1135.26	-2.80766	-7.0015
B7H15_01100	RES domain-containing protein	496.542	-1.31359	-2.48558
B7H15_01110	ABC transporter permease	267.735	-2.57278	-5.94956
B7H15_01115	ABC transporter permease	252.459	-2.49523	-5.6382
B7H15_01120	peptide ABC transporter substrate-binding protein	504.435	-2.2463	-4.74466
B7H15_01125	gamma-glutamyltransferase	560.676	-1.31775	-2.49277
B7H15_01145	sn-glycerol-3-phosphate ABC transporter ATP-binding protein UgpC	76.9349	-1.66052	-3.1613
B7H15_01150	extracellular solute-binding protein	92.5945	-2.08488	-4.24239
B7H15_01185	hexose-6-phosphate:phosphate antiporter	314.954	-4.19768	-18.3497
B7H15_01235	hypothetical protein	3.09029	-2.22696	-4.68146
B7H15_01240	thiolase family protein	654.385	-5.73735	-53.3475
B7H15_01245	3-hydroxyacyl-CoA dehydrogenase/enoyl-CoA hydratase family protein	960.885	-6.5063	-90.9056
B7H15_01250	acyl-CoA dehydrogenase family protein	485.625	-7.75508	-216.029
B7H15_01255	acyl--CoA ligase	578.439	-7.283	-155.74
B7H15_01260	acyl CoA:acetate/3-ketoacid CoA transferase	1188.62	-7.52616	-184.332
B7H15_01265	PrsW family intramembrane metalloprotease	138.985	-1.44258	-2.71806
B7H15_01270	ABC transporter substrate-binding protein	570.369	-1.48683	-2.80273
B7H15_01300	hypothetical protein	10.7923	-3.42265	-10.7231
B7H15_01305	PTS transporter subunit EIIC	111.939	-2.1031	-4.29632
B7H15_01310	nucleoside hydrolase	226.475	-2.59089	-6.02468
B7H15_01400	sensor histidine kinase	561.806	-1.06543	-2.0928
B7H15_01410	antiholin-like murein hydrolase modulator LrgA	130.9	-2.4154	-5.33468
B7H15_01415	antiholin-like protein LrgB	515.602	-3.36164	-10.2791
B7H15_01420	GntR family transcriptional regulator	535.267	-2.82295	-7.07606
B7H15_01445	class I SAM-dependent methyltransferase	57.0054	-1.56337	-2.95543
B7H15_01455	ribokinase	557.819	-2.7645	-6.79515
B7H15_01460	D-ribose pyranase	241.472	-2.66228	-6.33033
B7H15_01465	ribose transporter RbsU	469.747	-2.7091	-6.53915
B7H15_01485	transposase	25.1023	-1.50871	-2.84556
B7H15_01490	MFS transporter	83.6861	-1.94762	-3.85738
B7H15_01520	hypothetical protein	423.04	-1.54025	-2.90844
B7H15_01525	DUF5079 family protein	29.2977	-1.04073	-2.05727
B7H15_01535	CHAP domain-containing protein	593.931	-4.99156	-31.8134
B7H15_01540	WXG100 family type VII secretion effector EsxA	4584.58	-6.67406	-102.115
B7H15_01545	type VII secretion protein EsaA	860.258	-3.8585	-14.5052
B7H15_01550	type VII secretion protein EssA	103.316	-2.56764	-5.92838
B7H15_01555	type VII secretion protein EsaB	32.8338	-1.72972	-3.31664
B7H15_01560	type VII secretion protein EssB	211.025	-2.39255	-5.25084
B7H15_01565	type VII secretion protein EssC	1031	-1.48293	-2.79516
B7H15_01570	type VII secretion substrate EsaC	100.369	-1.35354	-2.55538
B7H15_01575	WXG100 family type VII secretion effector EsxB	100.689	-1.71981	-3.29393
B7H15_01580	DUF5081 family protein	194.225	-1.29408	-2.45221
B7H15_01590	DNA/RNA non-specific endonuclease	900.989	-1.21478	-2.32105
B7H15_01600	DUF5079 family protein	74.6939	-1.22783	-2.34215
B7H15_01610	hypothetical protein	172.613	-1.83616	-3.57058
B7H15_01665	DUF4467 domain-containing protein	331.417	-1.20098	-2.29896
B7H15_01670	DUF4064 domain-containing protein	587.651	-1.48782	-2.80465
B7H15_01720	winged helix-turn-helix transcriptional regulator	21.0462	-2.15452	-4.45222
B7H15_01725	pseudouridine-5\\'-phosphate glycosidase	22.7721	-2.24963	-4.75561
B7H15_01735	sodium:solute symporter	319.516	-5.72819	-53.01
B7H15_01740	N-acetylneuraminate lyase	159.553	-5.11307	-34.6089
B7H15_01745	ROK family protein	79.7315	-4.52019	-22.9463
B7H15_01755	N-acetylmannosamine-6-phosphate 2-epimerase	132.115	-2.44185	-5.43337
B7H15_01760	YjiH family protein	157.933	-4.51823	-22.9151
B7H15_01765	YSIRK domain-containing triacylglycerol lipase Lip2/Geh	24286.8	-7.64514	-200.178
B7H15_01800	NAD-dependent deacetylase	197.169	-1.15843	-2.23214
B7H15_01805	lipoate--protein ligase	166.687	-1.23785	-2.35847
B7H15_01820	PTS sugar transporter subunit IIB	69.0922	-2.21902	-4.65578
B7H15_01825	PTS sugar transporter subunit IIA	65.6041	-3.08015	-8.45705
B7H15_01830	BglG family transcription antiterminator	222.876	-2.7852	-6.89334
B7H15_01835	hypothetical protein	2.62211	-3.06368	-8.36103
B7H15_01855	glycerol-3-phosphate transporter	205.006	-2.80364	-6.98201
B7H15_01920	helix-turn-helix transcriptional regulator	22.582	-1.32282	-2.50155
B7H15_01925	DUF3169 family protein	132.113	-1.47382	-2.77757
B7H15_01930	ABC transporter ATP-binding protein	232.7	-1.41045	-2.6582
B7H15_02005	hypothetical protein	15.4931	-1.84575	-3.59441
B7H15_02075	hypothetical protein	327.93	-1.04095	-2.05759
B7H15_02080	NDxxF motif lipoprotein	895.232	-1.00612	-2.0085
B7H15_02085	hypothetical protein	138.052	-1.13922	-2.20261
B7H15_02090	alkyl hydroperoxide reductase subunit F	76349.6	-1.96175	-3.89534
B7H15_02095	peroxiredoxin	34341	-1.72086	-3.29634
B7H15_02105	L-cystine transporter	5337.38	-4.26674	-19.2493
B7H15_02110	hypothetical protein	248.673	-6.85912	-116.091
B7H15_02115	hypothetical protein	482.83	-5.84984	-57.6737
B7H15_02130	general stress protein	6149.28	-2.1604	-4.47038
B7H15_02160	type II toxin-antitoxin system PemK/MazF family toxin	43.4888	-1.4406	-2.71433
B7H15_02165	transposase	20.4504	-1.28936	-2.4442
B7H15_02175	hypothetical protein	35.5382	-1.15788	-2.2313
B7H15_02200	superantigen-like protein SSL3	18.2172	-1.25009	-2.37857
B7H15_02280	myeloperoxidase inhibitor SPIN	6542.51	-6.24929	-76.0717
B7H15_02345	hypothetical protein	358.097	-1.12481	-2.18073
B7H15_02350	hypothetical protein	61.6865	-2.15168	-4.44345
B7H15_02355	GTP-binding protein	364.539	-4.45685	-21.9607
B7H15_02360	hypothetical protein	124.092	-5.78777	-55.2448
B7H15_02365	phenol-soluble modulin PSM-alpha-3	9987.99	-12.6347	-6359.63
B7H15_02370	NADH dehydrogenase subunit 5	388.011	-11.6125	-3131.25
B7H15_02375	YbcC family protein	1213.92	-13.2037	-9434.61
B7H15_02380	DUF2294 domain-containing protein	318.896	-7.54235	-186.412
B7H15_02620	Veg family protein	3719.38	-2.70464	-6.51896
B7H15_02835	PLP-dependent aminotransferase family protein	91.8187	-1.10246	-2.14721
B7H15_02840	pyridoxal 5\\'-phosphate synthase lyase subunit PdxS	1332.08	-3.11152	-8.64294
B7H15_02845	pyridoxal 5\\'-phosphate synthase glutaminase subunit PdxT	1630.9	-2.86442	-7.28241
B7H15_02850	NupC/NupG family nucleoside CNT transporter	897.89	-2.67971	-6.40727
B7H15_03005	glycine C-acetyltransferase	2868.97	-1.19235	-2.28525
B7H15_03015	ribulokinase	210.208	-2.64722	-6.26459
B7H15_03020	NAD-dependent epimerase/dehydratase family protein	5345.69	-4.92709	-30.423
B7H15_03070	MSCRAMM family adhesin SdrC	125.048	-1.11071	-2.15952
B7H15_03075	MSCRAMM family adhesin SdrD	443.89	-2.34869	-5.0936
B7H15_03080	MSCRAMM family adhesin SdrE	471.417	-1.52989	-2.88764
B7H15_03200	hypothetical protein	11269.5	-7.19906	-146.938
B7H15_03220	mevalonate kinase	526.92	-1.77434	-3.4208
B7H15_03255	transposase	809.158	-1.36023	-2.56726
B7H15_03260	DUF443 family protein	151.368	-1.29961	-2.46162
B7H15_03265	DUF443 domain-containing protein	205.047	-1.21675	-2.32423
B7H15_03270	DUF443 family protein	199.174	-1.30155	-2.46493
B7H15_03275	DUF443 domain-containing protein	155.141	-1.78359	-3.44283
B7H15_03280	hypothetical protein	47.0485	-2.48478	-5.59748
B7H15_03285	DUF443 family protein	139.095	-1.95399	-3.87446
B7H15_03290	DUF443 domain-containing protein	124.04	-2.26376	-4.80242
B7H15_03295	hypothetical protein	12.45	-1.79702	-3.47501
B7H15_03300	hypothetical protein	56.5806	-1.58306	-2.99604
B7H15_03305	hypothetical protein	40.8492	-1.89276	-3.71345
B7H15_03310	DUF443 domain-containing protein	44.2293	-1.3289	-2.51211
B7H15_03380	hypothetical protein	89.8241	-1.88988	-3.70604
B7H15_03415	hypothetical protein	8839.14	-3.24035	-9.45021
B7H15_03430	global transcriptional regulator SarA	4252.75	-1.87112	-3.65815
B7H15_03515	Na+/H+ antiporter Mnh2 subunit C	20.8603	-1.06999	-2.09942
B7H15_03540	sodium:proton antiporter	2533.11	-1.67228	-3.18718
B7H15_03545	metal ABC transporter substrate-binding protein	9923.06	-7.02981	-130.672
B7H15_03550	metal ABC transporter permease	7925.99	-7.38902	-167.617
B7H15_03555	metal ABC transporter ATP-binding protein	8091.62	-7.03456	-131.104
B7H15_03605	ABC transporter ATP-binding protein/permease	13299.5	-3.87919	-14.7148
B7H15_03610	nucleoside permease	1554.96	-2.08958	-4.25624
B7H15_03640	dihydroxyacetone kinase subunit DhaK	414.274	-2.77524	-6.84591
B7H15_03645	dihydroxyacetone kinase subunit L	284.45	-2.67872	-6.40289
B7H15_03650	PTS-dependent dihydroxyacetone kinase phosphotransferase subunit DhaM	226.361	-2.11493	-4.3317
B7H15_03680	GNAT family N-acetyltransferase	1545.89	-1.26635	-2.40552
B7H15_03800	GNAT family N-acetyltransferase	302.885	-2.15682	-4.45932
B7H15_03840	GTP-binding protein	307.163	-1.31277	-2.48419
B7H15_03930	two-component system sensor histidine kinase SaeS	5470.72	-3.35466	-10.2294
B7H15_03935	response regulator transcription factor SaeR	4435.68	-3.3873	-10.4636
B7H15_03940	DoxX family protein	2026.41	-5.39485	-42.0737
B7H15_03945	DM13 domain-containing protein	3104.49	-5.3337	-40.3279
B7H15_03950	hypothetical protein	522.649	-1.08139	-2.11608
B7H15_04000	polyglycerol-phosphate lipoteichoic acid synthase LtaS	9650.56	-1.21753	-2.32548
B7H15_04055	peptide MFS transporter	2237.78	-1.51268	-2.85339
B7H15_04110	ABC transporter permease	83.3611	-2.80838	-7.00498
B7H15_04115	iron chelate uptake ABC transporter family permease subunit	63.47	-1.28882	-2.44327
B7H15_04120	ABC transporter ATP-binding protein	42.1277	-1.35223	-2.55307
B7H15_04125	siderophore ABC transporter substrate-binding protein	204.521	-1.10816	-2.1557
B7H15_04210	ribosome-associated translation inhibitor RaiA	4192.65	-2.74395	-6.69904
B7H15_04260	hypothetical protein	59.7838	-3.36408	-10.2965
B7H15_04290	hypothetical protein	2525.79	-4.67176	-25.4882
B7H15_04300	RNase adapter RapZ	801.682	-1.13503	-2.19624
B7H15_04370	hypothetical protein	723.573	-1.03371	-2.04728
B7H15_04405	hypothetical protein	410.426	-2.77677	-6.85317
B7H15_04410	hypothetical protein	113.947	-3.06045	-8.34233
B7H15_04415	DUF5067 domain-containing protein	314.958	-4.56186	-23.6188
B7H15_04445	extracellular matrix protein-binding adhesin Emp	65.2925	-3.86149	-14.5353
B7H15_04455	thermonuclease family protein	567.173	-3.30043	-9.85211
B7H15_04460	cold-shock protein	4445.07	-3.47846	-11.1461
B7H15_04470	hypothetical protein	189.905	-1.05311	-2.07499
B7H15_04480	hypothetical protein	334.996	-3.32876	-10.0475
B7H15_04485	hypothetical protein	195.831	-2.66575	-6.34558
B7H15_04495	hypothetical protein	1683.71	-1.05002	-2.07055
B7H15_04500	phosphoglycerate mutase family protein	401.047	-2.43257	-5.39855
B7H15_04545	hypothetical protein	38.4035	-2.47565	-5.56217
B7H15_04550	DUF1963 domain-containing protein	515.122	-2.1448	-4.42232
B7H15_04595	staphylococcal enterotoxin type Q	257.834	-1.03815	-2.0536
B7H15_04690	CsbD family protein	11137	-1.41192	-2.66092
B7H15_04730	chorismate mutase	13.5142	-1.32775	-2.51012
B7H15_04735	hypothetical protein	20.7801	-1.92569	-3.79919
B7H15_04785	DUF86 domain-containing protein	581.236	-1.13185	-2.1914
B7H15_04840	NAD(P)/FAD-dependent oxidoreductase	2563.72	-1.0386	-2.05424
B7H15_04865	Na+/H+ antiporter family protein	150.827	-1.32158	-2.4994
B7H15_04925	S1 RNA-binding domain-containing protein	2294.83	-1.37029	-2.58522
B7H15_04935	ornithine--oxo-acid transaminase	5155.74	-3.80981	-14.0238
B7H15_04940	Glu/Leu/Phe/Val dehydrogenase	10821.2	-4.15199	-17.7776
B7H15_04945	nitrogen fixation protein NifR	125.993	-3.48388	-11.188
B7H15_04950	hypothetical protein	892.868	-4.87763	-29.3977
B7H15_04955	glycerophosphodiester phosphodiesterase	249.837	-2.63844	-6.22658
B7H15_05035	LysR family transcriptional regulator	37.7506	-1.26041	-2.39565
B7H15_05050	membrane protein	30.9087	-1.82091	-3.53303
B7H15_05055	YbhB/YbcL family Raf kinase inhibitor-like protein	22.9762	-2.0565	-4.15977
B7H15_05060	MAP domain-containing protein	2221.05	-1.66768	-3.17702
B7H15_05085	ABC transporter permease	467.367	-2.22982	-4.69074
B7H15_05090	ABC transporter permease	662.639	-2.83485	-7.13468
B7H15_05095	ABC transporter ATP-binding protein	741.672	-2.91773	-7.55654
B7H15_05100	ATP-binding cassette domain-containing protein	829.984	-2.76226	-6.78457
B7H15_05105	peptide ABC transporter substrate-binding protein	1648.91	-2.44252	-5.43591
B7H15_05125	ABC transporter permease	96.711	-1.79191	-3.46273
B7H15_05215	cell elongation protein CozEa	1422.47	-1.39623	-2.63214
B7H15_05230	YjcG family protein	3333.07	-3.154	-8.90121
B7H15_05290	competence protein ComK	161.003	-2.24243	-4.73194
B7H15_05315	putative holin-like toxin	169.914	-3.92871	-15.2285
B7H15_05345	hypothetical protein	95.2802	-3.62169	-12.3094
B7H15_05350	hypothetical protein	73.9224	-6.09095	-68.1647
B7H15_05355	glycosyltransferase	1156.15	-5.94329	-61.5329
B7H15_05365	ABC transporter substrate-binding protein	119.982	-1.83654	-3.57153
B7H15_05415	staphostatin B	2296.69	-4.45758	-21.9718
B7H15_05420	cysteine protease staphopain B	6088.16	-4.74765	-26.8648
B7H15_05425	Glu-specific serine endopeptidase SspA	4619.87	-5.66454	-50.722
B7H15_05440	MarR family transcriptional regulator	69.5543	-2.44432	-5.44267
B7H15_05445	hypothetical protein	16.9432	-1.99416	-3.98383
B7H15_05475	cytochrome aa3 quinol oxidase subunit IV	1725.63	-2.16682	-4.49034
B7H15_05480	cytochrome aa3 quinol oxidase subunit III	4664.56	-2.13963	-4.4065
B7H15_05485	cytochrome aa3 quinol oxidase subunit I	14803.1	-2.12543	-4.36333
B7H15_05490	cytochrome aa3 quinol oxidase subunit II	9345.07	-2.11584	-4.33442
B7H15_05505	hypothetical protein	425.829	-2.30971	-4.95784
B7H15_05510	bifunctional methylenetetrahydrofolate dehydrogenase/methenyltetrahydrofolate cyclohydrolase FolD	3476.91	-2.2098	-4.62611
B7H15_05515	5-(carboxyamino)imidazole ribonucleotide mutase	541.504	-1.29184	-2.44841
B7H15_05520	5-(carboxyamino)imidazole ribonucleotide synthase	1977.83	-1.19082	-2.28283
B7H15_05525	phosphoribosylaminoimidazolesuccinocarboxamide synthase	663.696	-1.25282	-2.38307
B7H15_05530	phosphoribosylformylglycinamidine synthase subunit PurS	556.667	-1.33096	-2.51569
B7H15_05535	phosphoribosylformylglycinamidine synthase I	1365.87	-1.41294	-2.6628
B7H15_05540	phosphoribosylformylglycinamidine synthase subunit PurL	3934.41	-1.33646	-2.52531
B7H15_05545	amidophosphoribosyltransferase	2602.59	-1.20275	-2.30179
B7H15_05550	phosphoribosylformylglycinamidine cyclo-ligase	1913.19	-1.13656	-2.19857
B7H15_05650	ribonuclease J	7712.85	-1.60525	-3.04249
B7H15_05655	DNA-dependent RNA polymerase auxiliary subunit epsilon family protein	796.629	-1.44158	-2.71618
B7H15_05735	Nramp family divalent metal transporter	1205.26	-2.92504	-7.59496
B7H15_05740	YktB family protein	721.222	-1.0232	-2.03242
B7H15_05750	DUF5325 family protein	250.571	-1.32945	-2.51308
B7H15_05800	hypothetical protein	30.8804	-2.09604	-4.27534
B7H15_05865	LPXTG-anchored heme-scavenging protein IsdA	286.263	-2.41145	-5.32008
B7H15_05870	heme uptake protein IsdC	141.603	-3.77468	-13.6865
B7H15_05875	iron-regulated surface determinant protein IsdD	129.313	-2.59104	-6.02534
B7H15_05880	heme ABC transporter substrate-binding protein IsdE	117.034	-1.92392	-3.79452
B7H15_05885	hemin ABC transporter permease protein IsdF	127.33	-1.27576	-2.42127
B7H15_05910	phenylalanine--tRNA ligase subunit alpha	449.063	-1.30624	-2.47297
B7H15_05930	cell division protein ZapA	274.554	-1.22414	-2.33616
B7H15_05965	succinate dehydrogenase cytochrome b558 subunit	2098.44	-4.66841	-25.4292
B7H15_05970	succinate dehydrogenase flavoprotein subunit	9508.06	-4.13808	-17.607
B7H15_05975	succinate dehydrogenase iron-sulfur subunit	7137.61	-4.12419	-17.4383
B7H15_06000	complement convertase inhibitor Ecb	451.058	-4.86087	-29.058
B7H15_06005	hypothetical protein	14.7923	-3.7213	-13.1894
B7H15_06010	formyl peptide receptor-like 1 inhibitory protein	161.013	-4.87679	-29.3806
B7H15_06015	hypothetical protein	155.178	-2.54545	-5.83789
B7H15_06020	complement convertase inhibitor Efb	501.076	-6.60362	-97.2494
B7H15_06025	complement inhibitor SCIN-B	510.003	-6.57859	-95.5768
B7H15_06030	hypothetical protein	67.8856	-1.60195	-3.03554
B7H15_06035	hypothetical protein	137.915	-1.76067	-3.38856
B7H15_06040	hypothetical protein	113.306	-1.9452	-3.85091
B7H15_06045	hypothetical protein	199.41	-2.06724	-4.19085
B7H15_06050	alpha-hemolysin	14376.7	-11.234	-2408.62
B7H15_06055	hypothetical protein	3.16886	-3.8283	-14.2047
B7H15_06060	hypothetical protein	60.4338	-4.13214	-17.5347
B7H15_06070	superantigen-like protein SSL12	25.4679	-1.35833	-2.56389
B7H15_06075	superantigen-like protein SSL13	13.9504	-1.49868	-2.82585
B7H15_06080	superantigen-like protein SSL14	14.9104	-1.96965	-3.91673
B7H15_06085	ornithine carbamoyltransferase	35.2839	-3.10924	-8.62926
B7H15_06100	hypothetical protein	290.435	-3.10798	-8.62175
B7H15_06105	TDT family transporter	255.353	-1.50046	-2.82933
B7H15_06110	hypothetical protein	35.309	-2.29081	-4.89329
B7H15_06120	beta-class phenol-soluble modulin	4162.61	-12.3647	-5274.15
B7H15_06125	beta-class phenol-soluble modulin	2045.75	-10.8618	-1860.98
B7H15_06220	isoleucine--tRNA ligase	2509.4	-1.21411	-2.31998
B7H15_06245	bifunctional pyr operon transcriptional regulator/uracil phosphoribosyltransferase PyrR	677.088	-2.04922	-4.13881
B7H15_06290	VOC family protein	1006.65	-1.44994	-2.73197
B7H15_06320	hypothetical protein	469.605	-2.87273	-7.3245
B7H15_06325	TM2 domain-containing protein	1077.74	-1.72092	-3.29647
B7H15_06375	50S ribosomal protein L28	7926.71	-2.15178	-4.44377
B7H15_06420	acyl carrier protein	2006.46	-1.3709	-2.58632
B7H15_06470	lipoteichoic acid-specific glycosyltransferase YfhO	936.629	-1.30138	-2.46464
B7H15_06485	ADP-forming succinate--CoA ligase subunit beta	7094.61	-2.90588	-7.49474
B7H15_06490	succinate--CoA ligase subunit alpha	12232.9	-3.08659	-8.49489
B7H15_06495	LysM peptidoglycan-binding domain-containing protein	57.0971	-2.17991	-4.53126
B7H15_06500	FemA/FemB family glycyltransferase FmhC	110.028	-1.17647	-2.26023
B7H15_06505	DNA-processing protein DprA	50.3034	-1.32985	-2.51376
B7H15_06630	tRNA pseudouridine(55) synthase TruB	720.166	-1.6615	-3.16346
B7H15_06770	aquaporin family protein	701.46	-4.49954	-22.6202
B7H15_06780	glycerol-3-phosphate dehydrogenase/oxidase	1470.71	-1.08366	-2.11941
B7H15_06795	RNA chaperone Hfq	173.065	-1.61732	-3.06805
B7H15_06835	hypothetical protein	25.3103	-1.87577	-3.66997
B7H15_06845	hypothetical protein	26.4667	-1.3717	-2.58775
B7H15_06900	hypothetical protein	65.7504	-1.4157	-2.66789
B7H15_06920	low specificity L-threonine aldolase	216.835	-3.95277	-15.4847
B7H15_06935	ABC transporter ATP-binding protein	24.9725	-1.58908	-3.00858
B7H15_06970	hypothetical protein	449.597	-4.69313	-25.8685
B7H15_06975	aspartate kinase	193.139	-1.44761	-2.72756
B7H15_07105	aconitate hydratase AcnA	12115.8	-2.22347	-4.67017
B7H15_07170	bifunctional lysylphosphatidylglycerol flippase/synthetase MprF	3028.74	-1.51948	-2.86687
B7H15_07205	anthranilate synthase component I	34.8351	-1.07426	-2.10564
B7H15_07290	oligoendopeptidase F	1638.6	-1.39193	-2.6243
B7H15_07365	amidohydrolase	285.365	-1.27523	-2.42037
B7H15_07370	alanine racemase	216.853	-1.42072	-2.6772
B7H15_07380	sarA expression modulator MsaC	11.4102	-1.68792	-3.22191
B7H15_07435	hypothetical protein	573.293	-1.1192	-2.17226
B7H15_07445	dihydrolipoyllysine-residue succinyltransferase	10308.9	-3.60879	-12.1999
B7H15_07450	2-oxoglutarate dehydrogenase E1 component	18347.1	-3.91345	-15.0683
B7H15_07470	hypothetical protein	20.508	-3.74254	-13.385
B7H15_07570	hyperosmolarity resistance protein Ebh	1738.83	-1.65531	-3.14991
B7H15_07740	nucleoside-diphosphate kinase	608.948	-2.7235	-6.60475
B7H15_07765	HU family DNA-binding protein	18990.2	-1.39553	-2.63086
B7H15_07780	30S ribosomal protein S1	16026.3	-1.06433	-2.0912
B7H15_07820	elastin-binding protein EbpS	8923.35	-1.80984	-3.50603
B7H15_07830	helix-turn-helix domain-containing protein	418.317	-1.60059	-3.03267
B7H15_07840	ECF transporter S component	1559.11	-1.66813	-3.17801
B7H15_07875	Panton-Valentine bi-component leukocidin subunit F	3338.83	-3.38336	-10.435
B7H15_07880	Panton-Valentine bi-component leukocidin subunit S	2951.96	-4.15223	-17.7805
B7H15_08160	helix-turn-helix domain-containing protein	5.36597	-2.14151	-4.41224
B7H15_08165	helix-turn-helix domain-containing protein	147.27	-1.95304	-3.8719
B7H15_08170	hypothetical protein	140.298	-2.42573	-5.37301
B7H15_08175	hypothetical protein	97.31	-2.90843	-7.50798
B7H15_08180	hypothetical protein	183.075	-2.37149	-5.17476
B7H15_08185	hypothetical protein	365.65	-2.12298	-4.35594
B7H15_08190	hypothetical protein	747.101	-2.42377	-5.36572
B7H15_08195	site-specific integrase	215.732	-2.12104	-4.35008
B7H15_08200	hypothetical protein	458.217	-1.84064	-3.58169
B7H15_08205	hypothetical protein	508.812	-1.8676	-3.64924
B7H15_08210	DUF1672 domain-containing protein	490.828	-1.57722	-2.98395
B7H15_08220	two-component system response regulator SrrA	2451.68	-1.47475	-2.77935
B7H15_08245	site-specific tyrosine recombinase XerD	1317.24	-1.69715	-3.24259
B7H15_08250	transcriptional repressor	1726.43	-1.73503	-3.32886
B7H15_08295	alpha-glucosidase	899.241	-3.36706	-10.3178
B7H15_08300	LacI family DNA-binding transcriptional regulator	249.72	-4.13456	-17.5641
B7H15_08435	aminomethyl-transferring glycine dehydrogenase subunit GcvPB	6426.79	-3.05171	-8.29193
B7H15_08440	aminomethyl-transferring glycine dehydrogenase subunit GcvPA	4730.39	-2.67822	-6.40064
B7H15_08445	glycine cleavage system aminomethyltransferase GcvT	2363.41	-2.62311	-6.16076
B7H15_08450	shikimate kinase	218.764	-1.17238	-2.25383
B7H15_08475	prepilin-type N-terminal cleavage/methylation domain-containing protein	6.31146	-1.63689	-3.10994
B7H15_08480	type II secretion system F family protein	20.5402	-1.13584	-2.19747
B7H15_08485	GspE/PulE family protein	51.977	-1.9199	-3.78397
B7H15_08515	5-formyltetrahydrofolate cyclo-ligase	498.396	-1.4681	-2.76656
B7H15_08625	hypothetical protein	4288.03	-2.81066	-7.01607
B7H15_08630	flotillin-like protein FloA	4203.32	-2.46316	-5.51422
B7H15_08635	hypothetical protein	2438.07	-2.75606	-6.75549
B7H15_08765	hypothetical protein	52.4433	-1.11329	-2.16338
B7H15_08780	divalent metal cation transporter	908.444	-3.42215	-10.7194
B7H15_08785	5-oxoprolinase subunit PxpA	621.009	-3.26479	-9.61167
B7H15_08790	acetyl-CoA carboxylase biotin carboxylase subunit	1018.41	-3.35381	-10.2234
B7H15_08795	acetyl-CoA carboxylase biotin carboxyl carrier protein subunit	283.921	-3.30155	-9.85977
B7H15_08800	biotin-dependent carboxyltransferase family protein	696.592	-3.10122	-8.58146
B7H15_08805	5-oxoprolinase subunit PxpB	357.138	-3.55954	-11.7904
B7H15_08900	replication-associated recombination protein A	1494.21	-1.42165	-2.67891
B7H15_08910	hypothetical protein	19.6483	-2.09279	-4.26571
B7H15_09040	DNA repair protein RadC	34.2018	-2.90949	-7.51351
B7H15_09045	A24 family peptidase	65.657	-2.05977	-4.1692
B7H15_09070	AbrB family transcriptional regulator	883.738	-2.15488	-4.45332
B7H15_09075	hypothetical protein	11.3734	-1.29061	-2.44632
B7H15_09190	type I glyceraldehyde-3-phosphate dehydrogenase	5745.8	-5.45354	-43.8206
B7H15_09210	hypothetical protein	92.6565	-1.06188	-2.08765
B7H15_09215	PAS domain S-box protein	2585.63	-1.50796	-2.84408
B7H15_09220	response regulator transcription factor	1288.37	-1.2737	-2.41781
B7H15_09225	hypothetical protein	71.8343	-4.84587	-28.7575
B7H15_09230	NADP-dependent isocitrate dehydrogenase	9033.35	-2.91116	-7.52222
B7H15_09235	citrate synthase	4768.18	-3.11022	-8.63515
B7H15_09240	amino acid permease	4416.05	-1.31834	-2.49379
B7H15_09310	alanine dehydrogenase	3527.84	-4.29354	-19.6103
B7H15_09430	hypothetical protein	53.767	-1.74794	-3.35878
B7H15_09435	haptoglobin-binding heme uptake protein HarA	4756.98	-4.58508	-24.002
B7H15_09440	formate--tetrahydrofolate ligase	11191.7	-3.71493	-13.1312
B7H15_09445	acetate--CoA ligase	3400.41	-6.29085	-78.2953
B7H15_09450	hypothetical protein	340.491	-4.8566	-28.9723
B7H15_09455	acetoin utilization protein AcuC	818.172	-4.69299	-25.8661
B7H15_09470	bifunctional 3-deoxy-7-phosphoheptulonate synthase/chorismate mutase	1416.08	-1.12798	-2.18553
B7H15_09485	DUF948 domain-containing protein	14733.9	-1.00807	-2.01121
B7H15_09610	MarR family transcriptional regulator	2071.34	-2.44199	-5.43392
B7H15_09635	proline dehydrogenase	1167.84	-4.86142	-29.0692
B7H15_09705	CPBP family intramembrane metalloprotease SdpA	47.0054	-1.59426	-3.0194
B7H15_09750	phosphoenolpyruvate carboxykinase (ATP)	7376.74	-6.47976	-89.2486
B7H15_09790	excalibur calcium-binding domain-containing protein	1527.1	-9.36213	-658.086
B7H15_09795	DUF4352 domain-containing protein	3656.74	-9.27099	-617.797
B7H15_09800	hypothetical protein	25.4603	-3.93964	-15.3444
B7H15_09805	DUF3969 family protein	15.6432	-2.79043	-6.91835
B7H15_09810	hypothetical protein	48.8867	-1.26837	-2.4089
B7H15_09880	serine protease SplF	284.625	-3.91732	-15.1089
B7H15_09885	serine protease SplE	296.677	-4.04364	-16.4914
B7H15_09890	serine protease SplD	388.787	-4.56203	-23.6215
B7H15_09895	serine protease SplC	372.95	-2.98982	-7.94376
B7H15_09900	serine protease SplB	338.668	-4.65658	-25.2215
B7H15_09905	serine protease SplA	277.571	-6.15958	-71.4856
B7H15_09910	hypothetical protein	7.56318	-2.83189	-7.12005
B7H15_09915	DUF4888 domain-containing protein	240.861	-5.72083	-52.7403
B7H15_09920	hypothetical protein	1121.86	-1.74192	-3.3448
B7H15_09925	lantibiotic immunity ABC transporter MutE/EpiE family permease subunit	1110.7	-1.0907	-2.12977
B7H15_09935	S8 family serine peptidase	643.842	-1.11777	-2.17012
B7H15_09940	flavoprotein	27.0912	-2.1794	-4.52966
B7H15_09945	lanthionine synthetase C family protein	81.6754	-1.51423	-2.85645
B7H15_09950	lantibiotic dehydratase	261.163	-2.16281	-4.47786
B7H15_09955	gallidermin/nisin family lantibiotic	18.8803	-1.67402	-3.19104
B7H15_09965	gallidermin/nisin family lantibiotic	7.03694	-1.52468	-2.87723
B7H15_09970	bi-component leukocidin LukED subunit D	47.2864	-1.88101	-3.68333
B7H15_09975	bi-component leukocidin LukED subunit E	29.8173	-1.3058	-2.47221
B7H15_09980	hypothetical protein	46.4897	-1.43491	-2.70365
B7H15_09985	hypothetical protein	419.373	-1.06446	-2.09139
B7H15_10160	class II fumarate hydratase	3571.98	-1.76407	-3.39654
B7H15_10165	hypothetical protein	105.715	-1.06647	-2.09431
B7H15_10390	aromatic acid exporter family protein	1376.41	-1.11241	-2.16207
B7H15_10520	aromatic acid exporter family protein	156.771	-1.81928	-3.52905
B7H15_10570	DUF3267 domain-containing protein	674.842	-1.5246	-2.87707
B7H15_10580	diacylglycerol kinase	865.696	-1.13319	-2.19342
B7H15_10585	hypothetical protein	317.738	-1.42434	-2.68392
B7H15_10610	sodium/proline symporter PutP	989.479	-2.84425	-7.18133
B7H15_10650	cysteine protease staphopain A	571.203	-2.51625	-5.72093
B7H15_10680	nitric oxide synthase oxygenase	515.855	-1.92883	-3.80745
B7H15_10685	prephenate dehydratase	444.496	-1.1342	-2.19497
B7H15_10690	hypothetical protein	101.369	-2.18964	-4.56193
B7H15_10695	SLC13 family permease	1121.6	-1.73065	-3.31878
B7H15_10720	aldehyde dehydrogenase	2006.69	-1.67406	-3.19111
B7H15_10770	phenol-soluble modulin export ABC transporter permease subunit PmtD	752.48	-1.135	-2.19619
B7H15_10775	phenol-soluble modulin export ABC transporter ATP-binding protein PmtC	1087.24	-1.12477	-2.18066
B7H15_10780	phenol-soluble modulin export ABC transporter permease subunit PmtB	428.652	-1.26048	-2.39575
B7H15_10785	phenol-soluble modulin export ABC transporter ATP-binding protein PmtA	1030.64	-1.27338	-2.41727
B7H15_10790	GntR family transcriptional regulator	185.865	-1.6667	-3.17488
B7H15_10810	MAP domain-containing protein	474.137	-4.14536	-17.696
B7H15_10815	extracellular adherence protein Eap/Map	2709.56	-4.37222	-20.7095
B7H15_10820	hypothetical protein	294.849	-4.86709	-29.1836
B7H15_10885	hypothetical protein	851.456	-1.09734	-2.1396
B7H15_11175	sphingomyelin phosphodiesterase	66.9577	-1.41052	-2.65832
B7H15_11180	bi-component leukocidin LukGH subunit G	462.803	-2.64165	-6.24045
B7H15_11185	bi-component leukocidin LukGH subunit H	467.356	-4.46651	-22.1082
B7H15_11205	iron-hydroxamate ABC transporter substrate-binding protein	44.5301	-1.809	-3.50399
B7H15_11280	delta-lysin family phenol-soluble modulin	113294	-13.4531	-11215
B7H15_11285	accessory gene regulator AgrB	12729.5	-6.5498	-93.6884
B7H15_11290	cyclic lactone autoinducer peptide	3919.11	-6.79196	-110.811
B7H15_11295	GHKL domain-containing protein	23986.3	-6.7382	-106.758
B7H15_11300	LytTR family DNA-binding domain-containing protein	18615.4	-6.48135	-89.3471
B7H15_11305	hypothetical protein	40.1308	-3.03601	-8.20219
B7H15_11320	LacI family DNA-binding transcriptional regulator	330.268	-2.56042	-5.89879
B7H15_11540	potassium-transporting ATPase subunit KdpA	28.6879	-1.19872	-2.29536
B7H15_11550	sensor histidine kinase KdpD	427.477	-2.56592	-5.92132
B7H15_11555	response regulator transcription factor	102.237	-2.95583	-7.75877
B7H15_11580	hypothetical protein	1698.55	-1.66884	-3.17959
B7H15_11595	cardiolipin synthase	771.984	-1.80699	-3.49911
B7H15_11600	HD domain-containing protein	352.765	-1.79262	-3.46442
B7H15_11605	hypothetical protein	51.1016	-2.97811	-7.87954
B7H15_11610	hypothetical protein	63.0027	-2.56546	-5.91945
B7H15_11615	hypothetical protein	93.1081	-2.51138	-5.70166
B7H15_11625	thiamine phosphate synthase	640.141	-2.80955	-7.01065
B7H15_11630	hydroxyethylthiazole kinase	713.957	-2.67983	-6.40781
B7H15_11635	bifunctional hydroxymethylpyrimidine kinase/phosphomethylpyrimidine kinase	663.907	-2.49337	-5.63091
B7H15_11640	thiaminase II	459.334	-2.36142	-5.13878
B7H15_11650	single-stranded DNA-binding protein	316.146	-1.3678	-2.58077
B7H15_11675	hypothetical protein	2.37358	-2.35493	-5.11568
B7H15_11680	F0F1 ATP synthase subunit epsilon	2396.97	-1.56966	-2.96835
B7H15_11685	F0F1 ATP synthase subunit beta	7493.83	-1.1432	-2.20871
B7H15_11690	F0F1 ATP synthase subunit gamma	4657.73	-1.02037	-2.02844
B7H15_11710	F0F1 ATP synthase subunit C	1121.71	-1.25813	-2.39186
B7H15_11850	membrane protein	1512.87	-2.24514	-4.74084
B7H15_11855	#N/A	2730.54	-4.56425	-23.6579
B7H15_11860	hypothetical protein	197.207	-5.34254	-40.5757
B7H15_11865	deoxyribose-phosphate aldolase	845.613	-3.54362	-11.661
B7H15_11920	hypothetical protein	859.997	-1.87118	-3.65831
B7H15_11925	resolvase	59.5649	-1.62957	-3.09421
B7H15_11930	SAP domain-containing protein	339.357	-1.1857	-2.27473
B7H15_11935	hypothetical protein	5.46384	-2.14949	-4.4367
B7H15_11975	methicillin resistance protein FmtB	337.426	-1.53302	-2.89391
B7H15_11995	arginase	1628.7	-3.20629	-9.22972
B7H15_12095	hypothetical protein	3488.14	-6.19882	-73.4566
B7H15_12135	staphyloferrin A export MFS transporter	225.334	-2.06871	-4.19512
B7H15_12140	D-ornithine--citrate ligase SfaD	992.89	-2.17134	-4.50442
B7H15_12150	Asp23/Gls24 family envelope stress response protein	42807.6	-1.25855	-2.39255
B7H15_12155	DUF2273 domain-containing protein	10310.4	-1.21276	-2.3178
B7H15_12160	alkaline shock response membrane anchor protein AmaP	23559.7	-1.27912	-2.42691
B7H15_12185	6-phospho-beta-galactosidase	282.465	-1.9203	-3.78501
B7H15_12190	lactose-specific PTS transporter subunit EIIC	245.384	-2.88357	-7.37975
B7H15_12195	PTS lactose/cellobiose transporter subunit IIA	30.8978	-3.59743	-12.1042
B7H15_12200	tagatose-bisphosphate aldolase	109.395	-4.36988	-20.6759
B7H15_12205	tagatose-6-phosphate kinase	108.861	-4.25021	-19.0301
B7H15_12210	hypothetical protein	121.144	-4.88747	-29.5988
B7H15_12255	hyaluronate lyase HysA	117.292	-1.02955	-2.04139
B7H15_12265	HAD-IIB family hydrolase	379.967	-1.1438	-2.20962
B7H15_12270	MAP domain-containing protein	5847.6	-2.39776	-5.26985
B7H15_12295	hypothetical protein	930.425	-1.94272	-3.8443
B7H15_12300	AAA family ATPase	1040	-2.88758	-7.40031
B7H15_12305	hypothetical protein	833.668	-3.29908	-9.84288
B7H15_12310	hypothetical protein	178.357	-3.33967	-10.1237
B7H15_12565	winged helix DNA-binding protein	30.5498	-1.31903	-2.49498
B7H15_12570	MFS transporter	98.2072	-1.02732	-2.03823
B7H15_12725	HTH-type transcriptional regulator SarR	2103.65	-1.84229	-3.58579
B7H15_12740	SarA family transcriptional regulator	40.5812	-1.10473	-2.15058
B7H15_12745	helix-turn-helix domain-containing protein	195.184	-2.40785	-5.30684
B7H15_12755	hypothetical protein	1619.31	-1.625	-3.08442
B7H15_12845	MurR/RpiR family transcriptional regulator	1250.67	-1.23079	-2.34696
B7H15_12885	alpha-glucoside-specific PTS transporter subunit IIBC	304.786	-1.62095	-3.07578
B7H15_12920	imidazolonepropionase	2630.26	-5.54961	-46.838
B7H15_12925	urocanate hydratase	2130.82	-7.01337	-129.192
B7H15_12930	LysR family transcriptional regulator	143.979	-3.36328	-10.2908
B7H15_12935	FosB1/FosB3 family fosfomycin resistance bacillithiol transferase	36.1671	-1.23414	-2.35241
B7H15_12985	DUF805 domain-containing protein	421.696	-1.48763	-2.80427
B7H15_12990	DNA-3-methyladenine glycosylase	70.44	-1.00593	-2.00824
B7H15_13120	malate dehydrogenase (quinone)	2782.87	-2.89721	-7.44985
B7H15_13125	L-lactate permease	3188.43	-2.79496	-6.94012
B7H15_13135	hypothetical protein	4210.64	-1.04538	-2.06392
B7H15_13195	YbgA family protein	81.1176	-2.54272	-5.82688
B7H15_13200	AraC family transcriptional regulator Rsp	523.175	-1.16522	-2.24268
B7H15_13225	MarR family transcriptional regulator	2015.42	-1.51913	-2.86619
B7H15_13265	nitrate respiration regulation accessory nitrate sensor NreA	997.731	-1.13216	-2.19187
B7H15_13270	respiratory nitrate reductase subunit gamma	431.34	-1.63743	-3.11111
B7H15_13385	hypothetical protein	13.0918	-2.8324	-7.12256
B7H15_13390	putative metal homeostasis protein	69.2864	-2.61574	-6.1294
B7H15_13405	hypothetical protein	8.27755	-1.89386	-3.71629
B7H15_13410	immunoglobulin-binding protein Sbi	1325.97	-2.45437	-5.48073
B7H15_13415	hypothetical protein	152.112	-2.85266	-7.2233
B7H15_13425	bi-component gamma-hemolysin HlgAB subunit A	408.169	-5.60302	-48.6047
B7H15_13430	bi-component gamma-hemolysin HlgCB subunit C	273.32	-4.37073	-20.6881
B7H15_13435	bi-component gamma-hemolysin HlgAB/HlgCB subunit B	444.314	-2.79781	-6.95383
B7H15_13520	multidrug effflux MFS transporter	821.722	-1.05717	-2.08085
B7H15_13540	amino acid permease	1080.21	-4.12492	-17.4472
B7H15_13590	ABC transporter permease	595.059	-1.25141	-2.38073
B7H15_13595	osmoprotectant ABC transporter substrate-binding protein	722.176	-1.45168	-2.73527
B7H15_13600	ABC transporter permease	355.647	-1.2666	-2.40594
B7H15_13605	ABC transporter ATP-binding protein	770.839	-1.38629	-2.61406
B7H15_13640	carboxylesterase/lipase family protein	2515.38	-2.39206	-5.24906
B7H15_13645	MFS transporter	298.924	-1.73458	-3.32783
B7H15_13650	iron export ABC transporter permease subunit FetB	817.788	-1.57444	-2.9782
B7H15_13700	ABC transporter ATP-binding protein	72.0001	-1.10798	-2.15543
B7H15_13710	ABC transporter permease	40.6972	-1.58657	-3.00334
B7H15_13720	staphylopine-dependent metal ABC transporter substrate-binding protein CntA	211.597	-1.338	-2.528
B7H15_13730	D-histidine (S)-2-aminobutanoyltransferase CntL	36.4405	-1.89111	-3.70921
B7H15_13760	carboxymuconolactone decarboxylase family protein	1603.11	-1.46919	-2.76866
B7H15_13775	hypothetical protein	8.02618	-1.45136	-2.73465
B7H15_13780	DUF1433 domain-containing protein	256.133	-1.07612	-2.10836
B7H15_13800	hypothetical protein	510.713	-2.35246	-5.10696
B7H15_13850	phospho-sugar mutase	587.755	-1.73742	-3.33437
B7H15_13860	hypothetical protein	51.7814	-1.37828	-2.59958
B7H15_13880	YSIRK signal domain/LPXTG anchor domain surface protein	780.237	-1.73854	-3.33697
B7H15_13890	HTH-type transcriptional regulator SarU	9.37337	-1.76228	-3.39234
B7H15_13955	MFS transporter	1276.61	-3.53137	-11.5624
B7H15_13995	fructose-1,6-bisphosphatase	1853.21	-4.98602	-31.6913
B7H15_14045	ATP-binding cassette domain-containing protein	25.24	-1.29937	-2.46122
B7H15_14050	peptide ABC transporter permease	55.3111	-1.39202	-2.62446
B7H15_14075	L-serine ammonia-lyase, iron-sulfur-dependent, subunit alpha	425.759	-1.88588	-3.69579
B7H15_14080	L-serine ammonia-lyase, iron-sulfur-dependent subunit beta	259.827	-2.75573	-6.75395
B7H15_14085	PTS fructose transporter subunit IIC	432.381	-3.61487	-12.2514
B7H15_14095	DMT family transporter	711.969	-1.51713	-2.86221
B7H15_14140	sterile alpha motif-like domain-containing protein	2381.18	-2.54659	-5.84251
B7H15_14190	ferrous iron transport protein B	148.57	-1.82894	-3.55277
B7H15_14195	ferrous iron transport protein A	14.308	-3.93531	-15.2984
B7H15_14210	hypothetical protein	25.3878	-2.92979	-7.62
B7H15_14215	L-glutamate gamma-semialdehyde dehydrogenase	6873.37	-4.57278	-23.7983
B7H15_14230	heavy metal translocating P-type ATPase	2020.81	-3.00161	-8.00895
B7H15_14235	copper chaperone CopZ	324.546	-3.63967	-12.4638
B7H15_14250	NAD(P)/FAD-dependent oxidoreductase	1675.48	-2.65726	-6.30834
B7H15_14255	phytoene/squalene synthase family protein	846.771	-2.83506	-7.1357
B7H15_14260	4,4\\'-diaponeurosporenoate glycosyltransferase	1148.52	-2.99092	-7.94981
B7H15_14265	NAD(P)/FAD-dependent oxidoreductase	1654.79	-3.04137	-8.23274
B7H15_14270	glycosyl-4,4\\'-diaponeurosporenoate acyltransferase	522.269	-3.07186	-8.40859
B7H15_14370	hypothetical protein	87.2192	-3.02001	-8.11174
B7H15_14375	DUF4176 domain-containing protein	73.8765	-4.06249	-16.7083
B7H15_14380	hypothetical protein	68.2012	-4.50091	-22.6417
B7H15_14385	TIGR04197 family type VII secretion effector	56.7782	-3.81211	-14.0462
B7H15_14420	hypothetical protein	2.28395	-2.86328	-7.27668
B7H15_14585	glutathione peroxidase	86.5162	-1.82125	-3.53387
B7H15_14590	hypothetical protein	21.612	-2.65671	-6.30591
B7H15_14595	hypothetical protein	19.847	-2.49566	-5.63987
B7H15_14600	hypothetical protein	2.16961	-3.51244	-11.4117
B7H15_14605	ABC transporter permease	353.495	-1.10214	-2.14674
B7H15_14610	ABC transporter ATP-binding protein	107.27	-1.40498	-2.64814
B7H15_14695	immunodominant staphylococcal antigen IsaB	1380.97	-2.87746	-7.34857
B7H15_14700	hypothetical protein	104.036	-2.22039	-4.66019
B7H15_14705	BglG family transcription antiterminator	149.502	-2.04845	-4.13662
B7H15_14710	PTS fructose transporter subunit IIABC	326.522	-2.00104	-4.00288
B7H15_14715	mannose-6-phosphate isomerase, class I	216.479	-1.34979	-2.54875
B7H15_14725	amidase domain-containing protein	3483.74	-2.7077	-6.53281
B7H15_14755	accessory Sec system protein Asp3	281.622	-1.79794	-3.47723
B7H15_14760	accessory Sec system protein Asp2	425.321	-2.06042	-4.17109
B7H15_14765	accessory Sec system protein Asp1	419.211	-2.77664	-6.85254
B7H15_14770	accessory Sec system protein translocase subunit SecY2	231.831	-3.13089	-8.75978
B7H15_14775	serine-rich repeat glycoprotein adhesin SasA	13590.6	-3.91869	-15.1232
B7H15_14780	flavin reductase family protein	373.949	-2.34526	-5.08152
B7H15_14825	capsular polysaccharide biosynthesis protein CapA	9.93125	-1.37937	-2.60155
B7H15_14830	ica operon transcriptional regulator IcaR	1330.21	-3.96875	-15.6572
B7H15_14855	hypothetical protein	34.9487	-7.11511	-138.632
B7H15_14860	hypothetical protein	899.425	-8.58389	-383.716
B7H15_14865	YSIRK domain-containing triacylglycerol lipase Lip1	34529.2	-9.23733	-603.551
B7H15_14955	SMP-30/gluconolactonase/LRE family protein	282.036	-1.99182	-3.97738
B7H15_14985	anion permease	915.545	-2.10886	-4.31352
B7H15_15000	HoxN/HupN/NixA family nickel/cobalt transporter	420.259	-1.19811	-2.29439
B7H15_15050	cold-shock protein	2939.22	-2.42059	-5.35391
