# Supplementary material for: <em>Staphylococcus aureus </em>Stress Response to Bicarbonate Depletion
Source: Preprints.org preprint supplement (doi:10.20944/preprints202407.2401.v1), 2024-07-30
Supplement: Supplementary file 2 [file supplementary]

# A LC-MS Peak 1

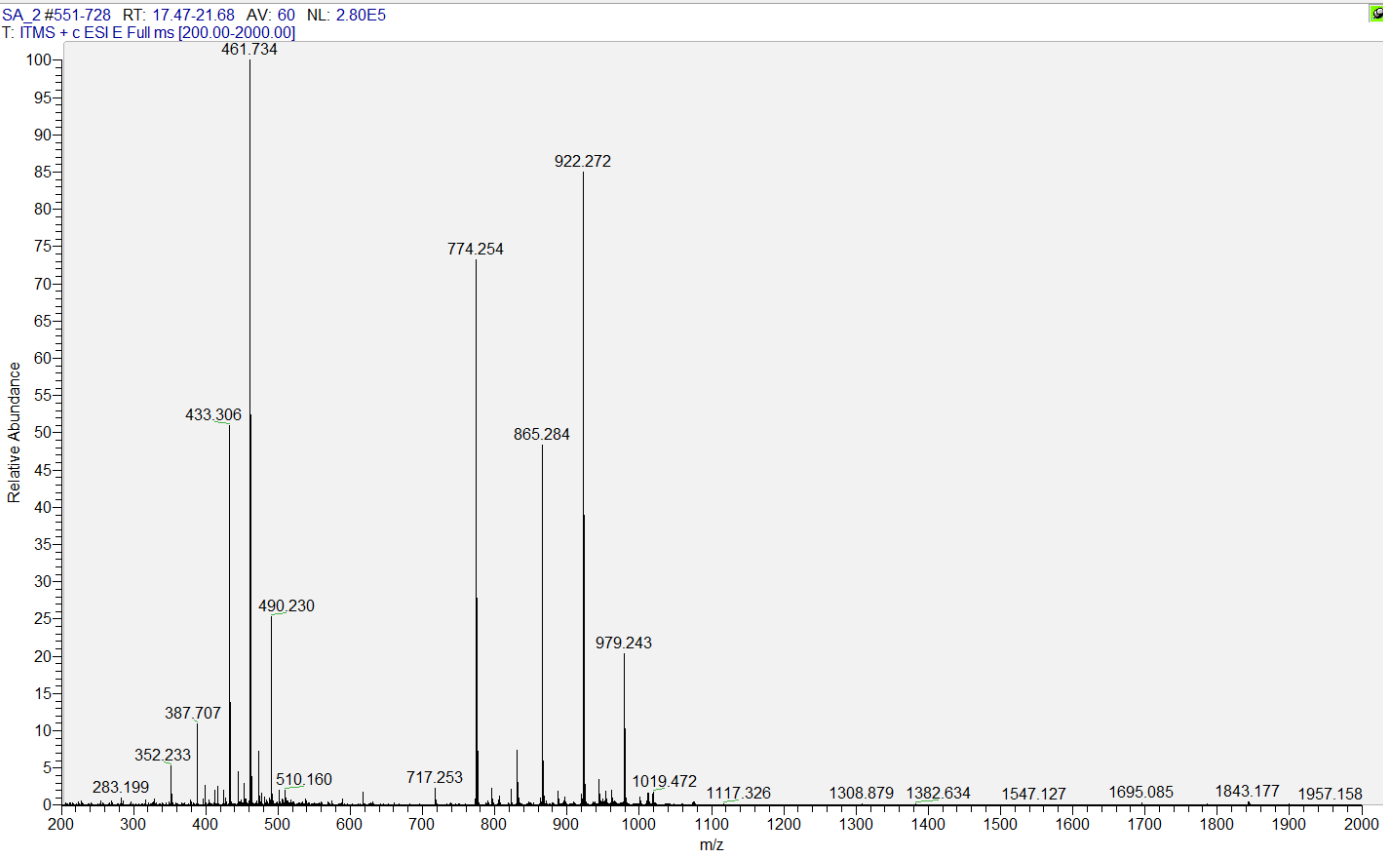

# B LC-MS/MS Peak 1

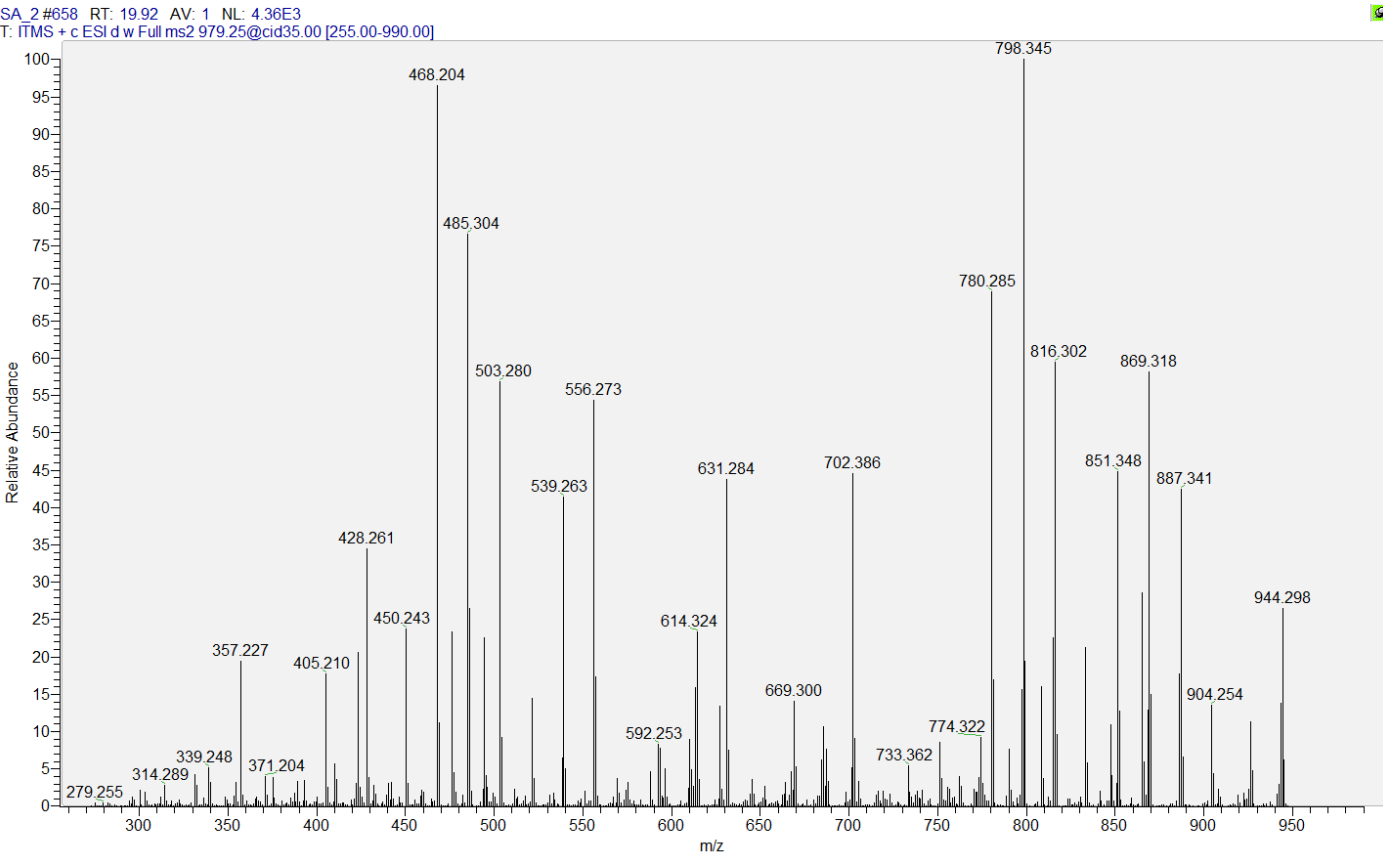

# A LC-MS Peak 2

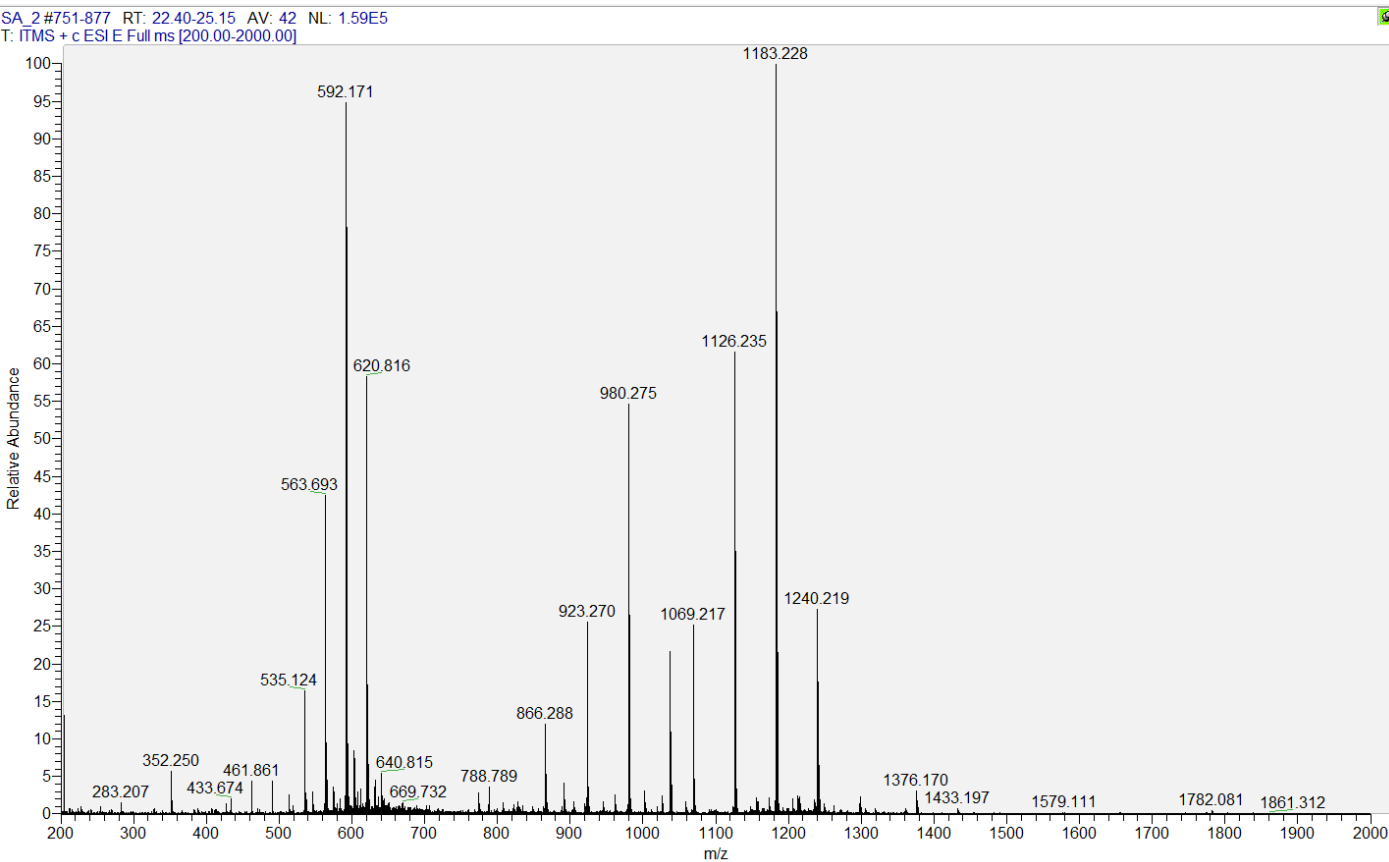

# B LC-MS/MS Peak 2

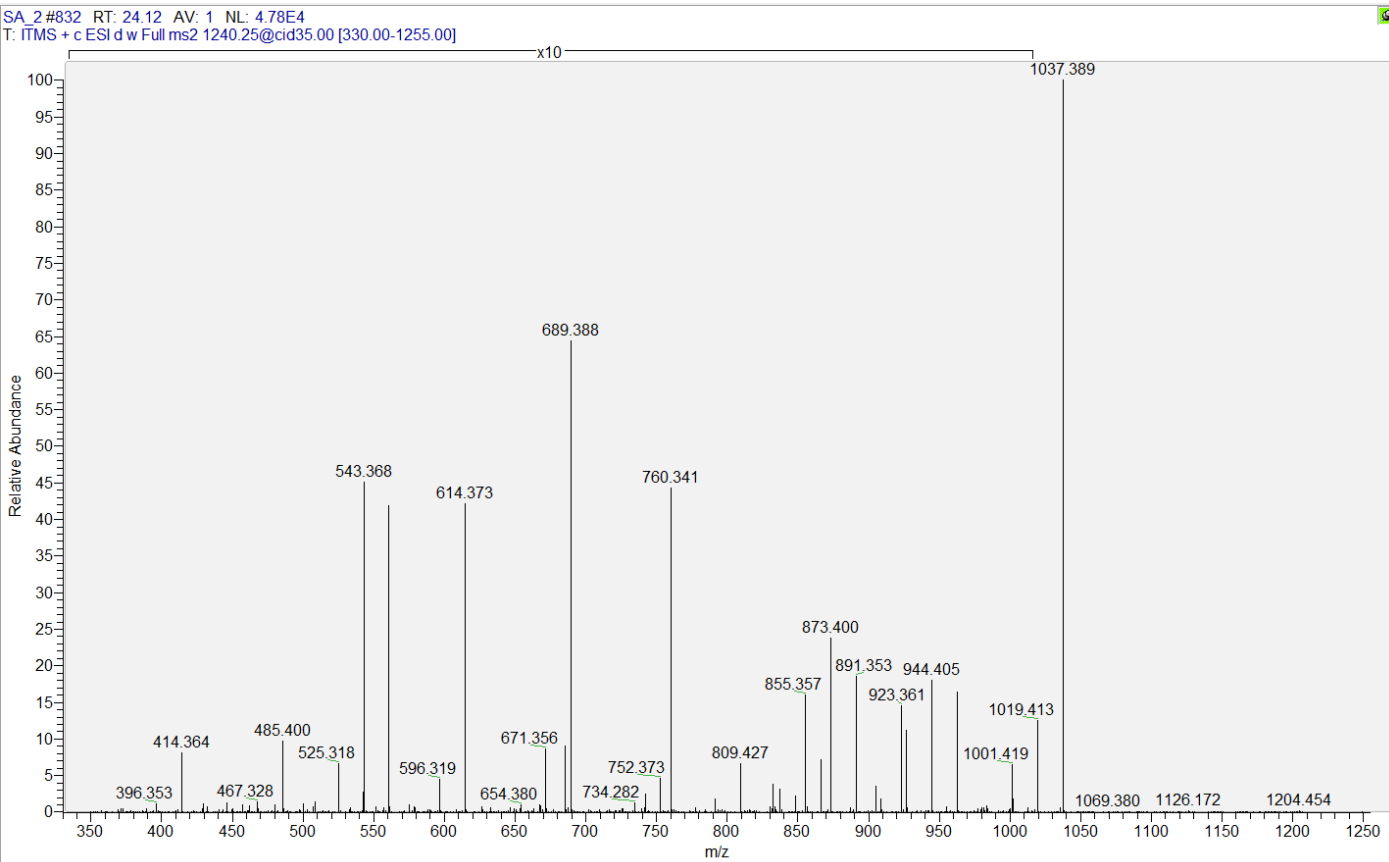

# A LC-MS Peak 3

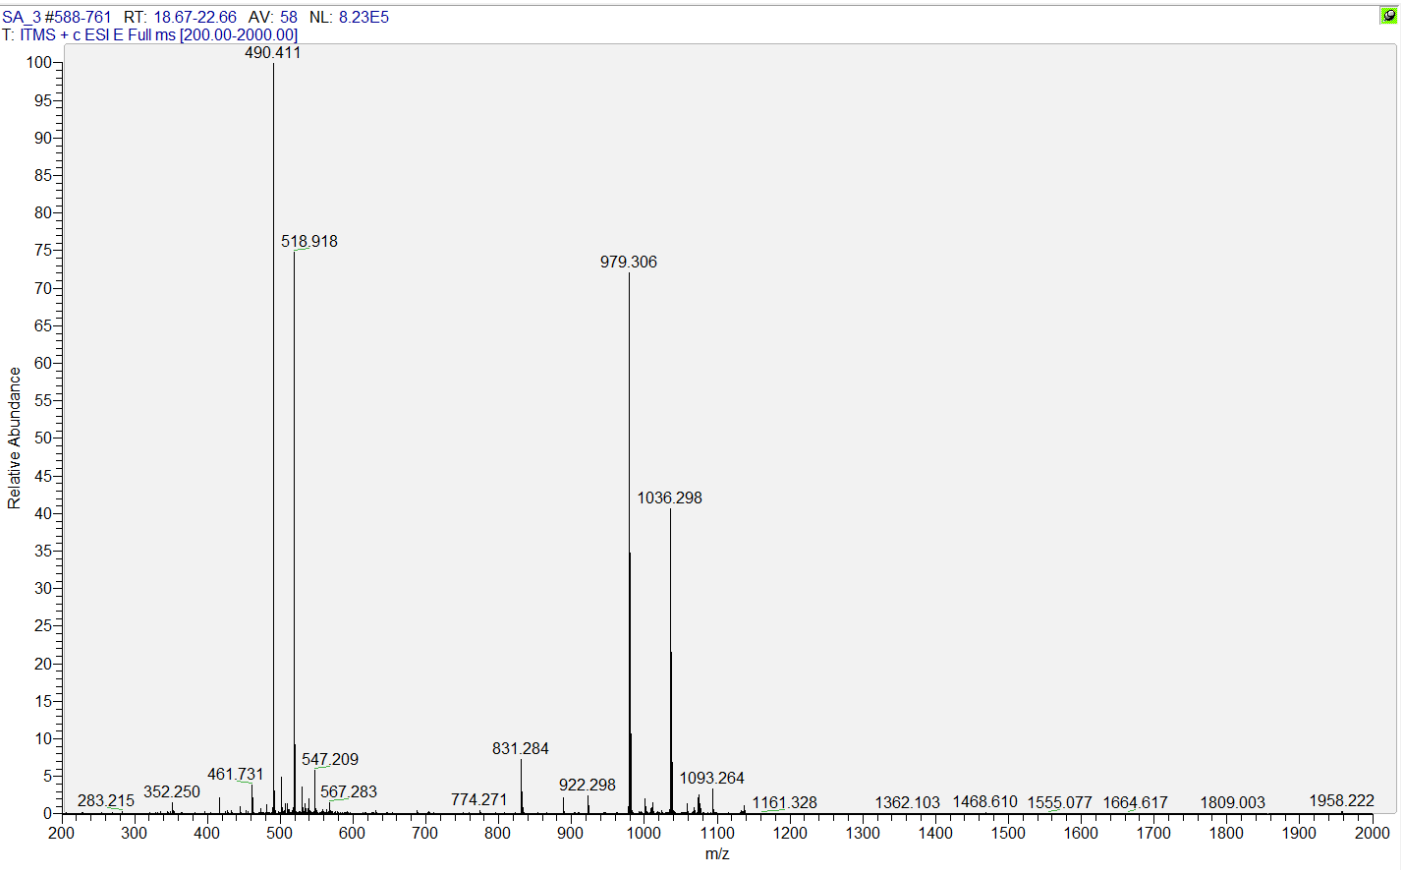

# B LC-MS/MS Peak 3

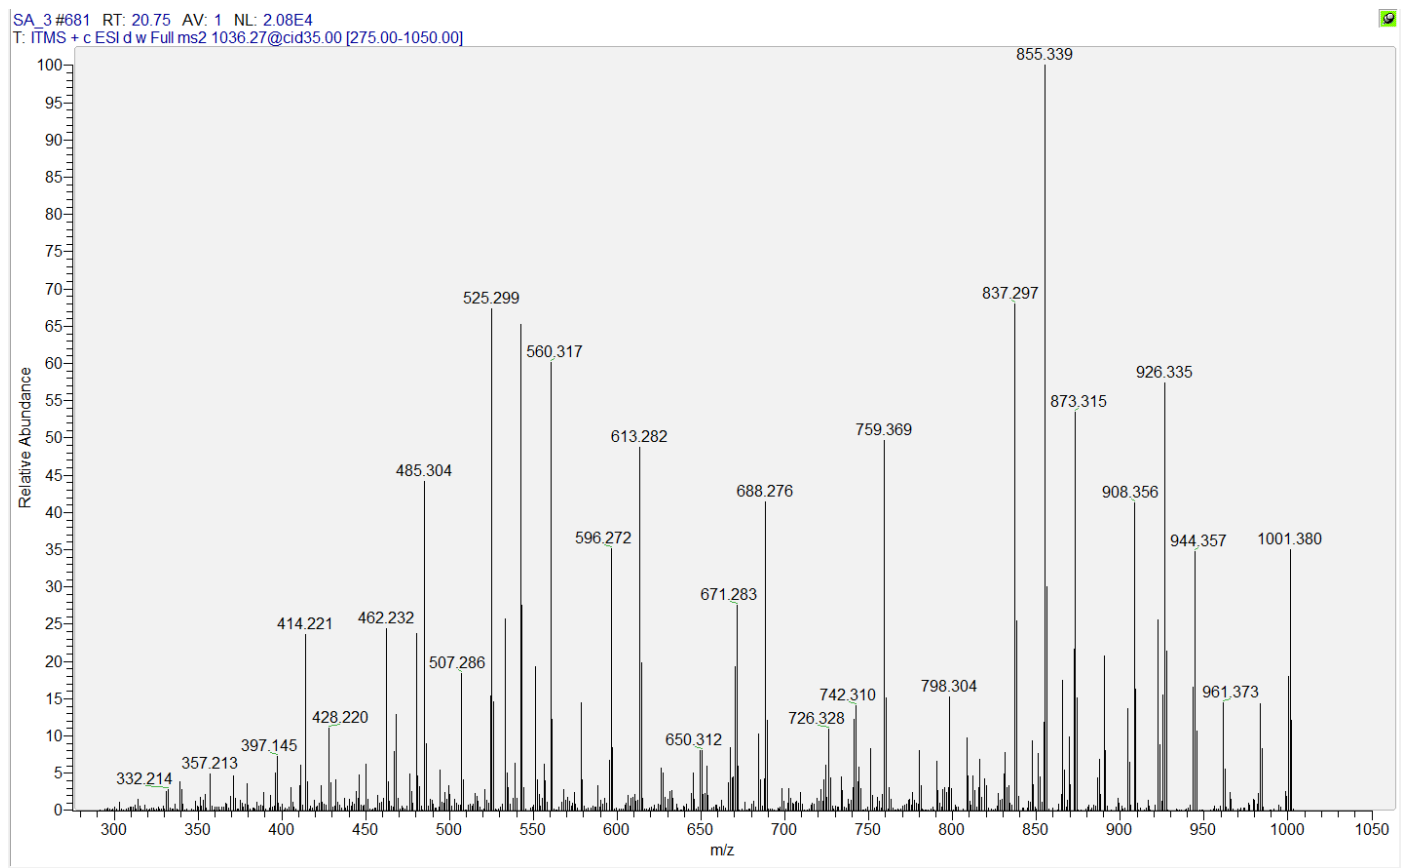

# A LC-MS Peak 4

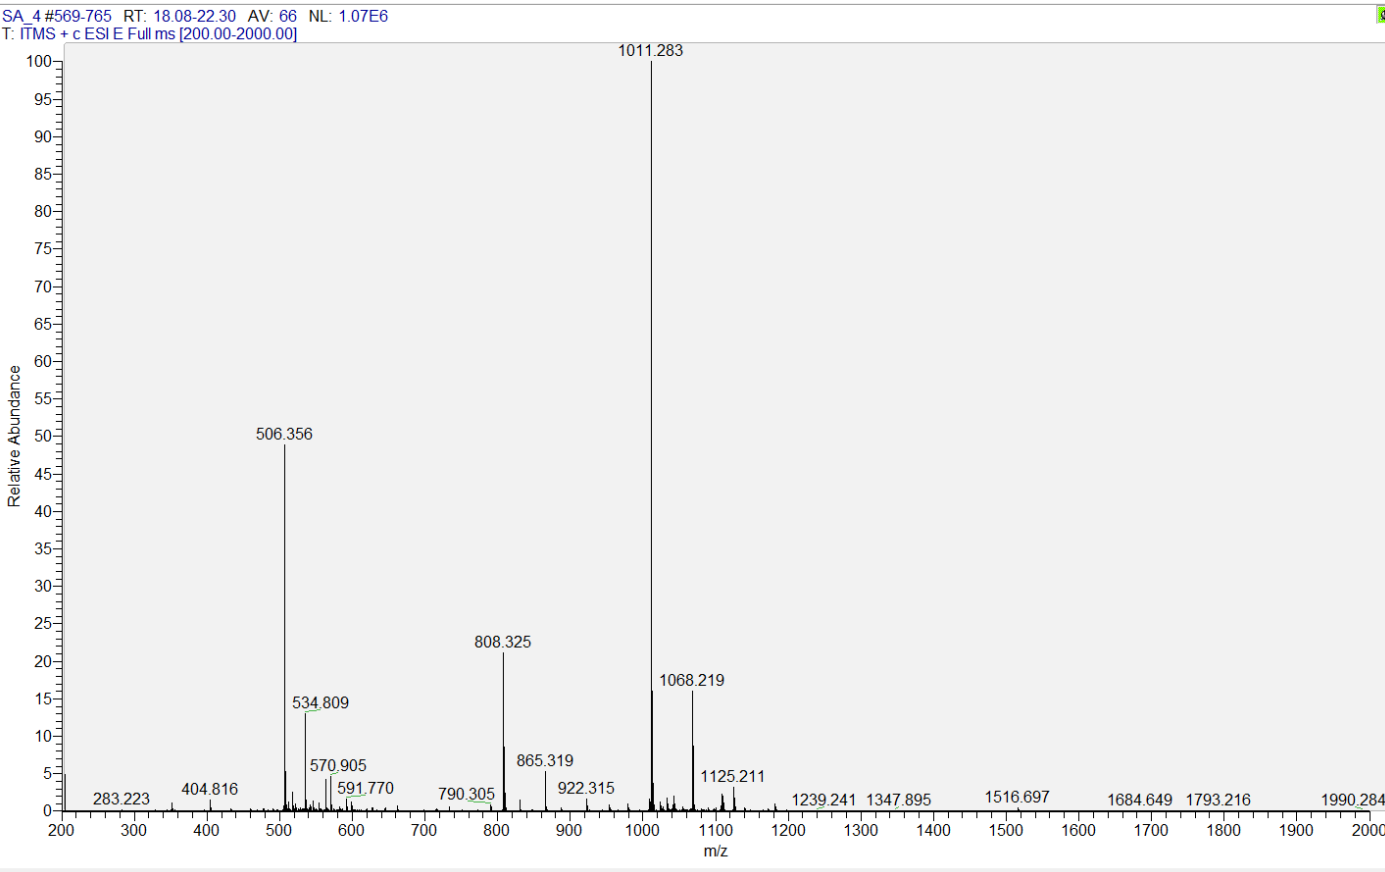

# B LC-MS/MS Peak 4

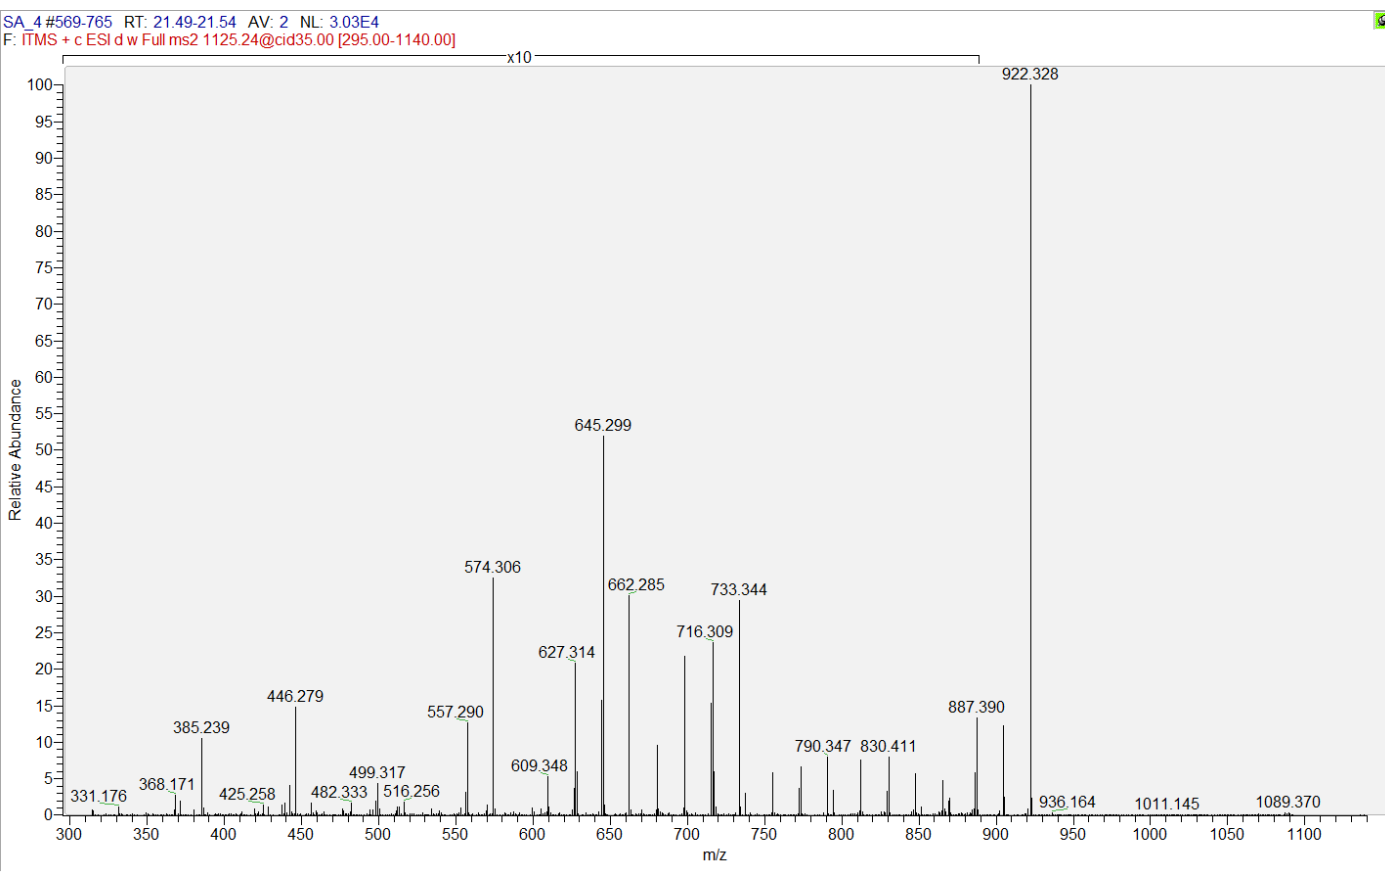

# A LC-MS Peak 5

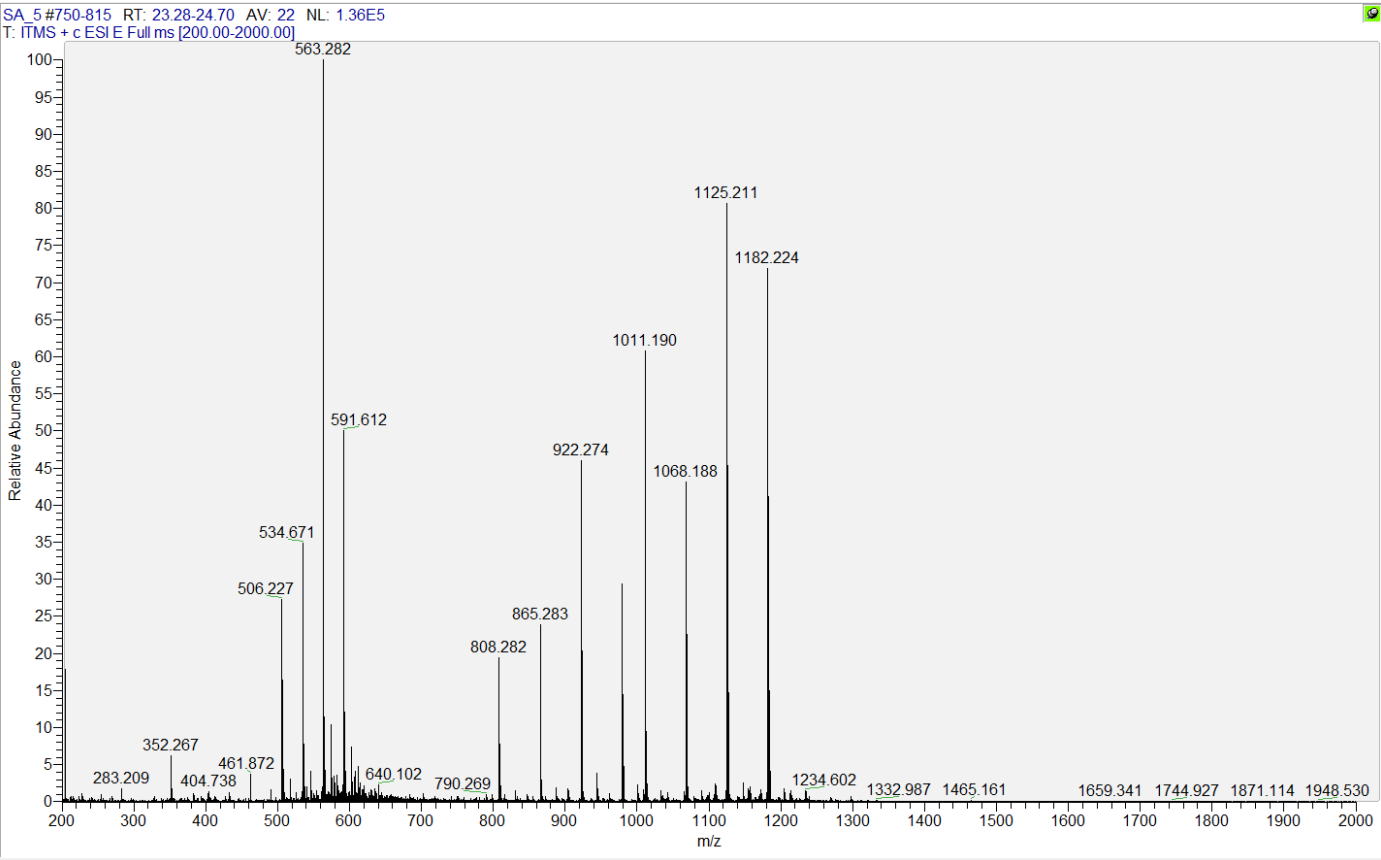

# B LC-MS/MS Peak 5

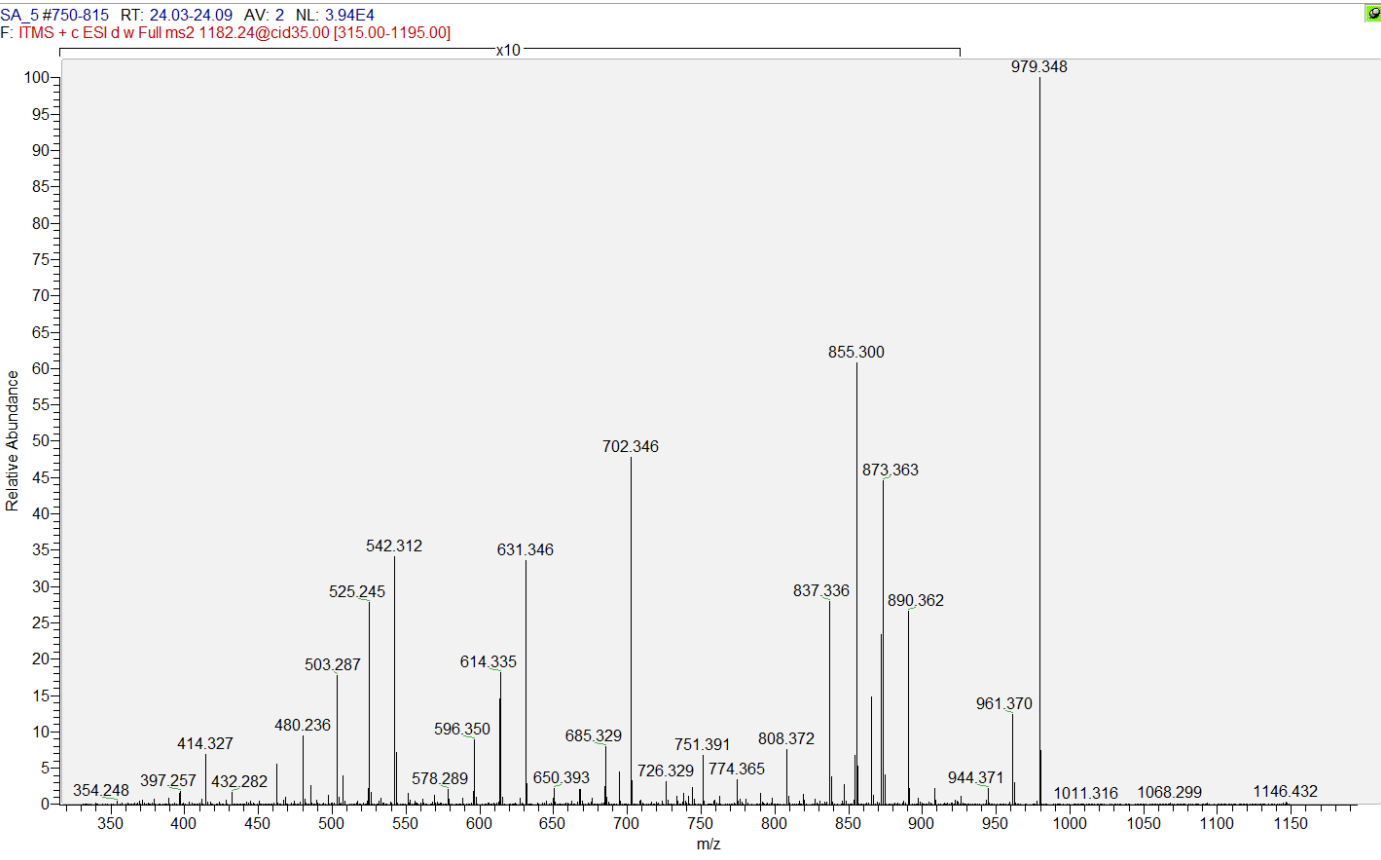

# A LC-MS Peak 6

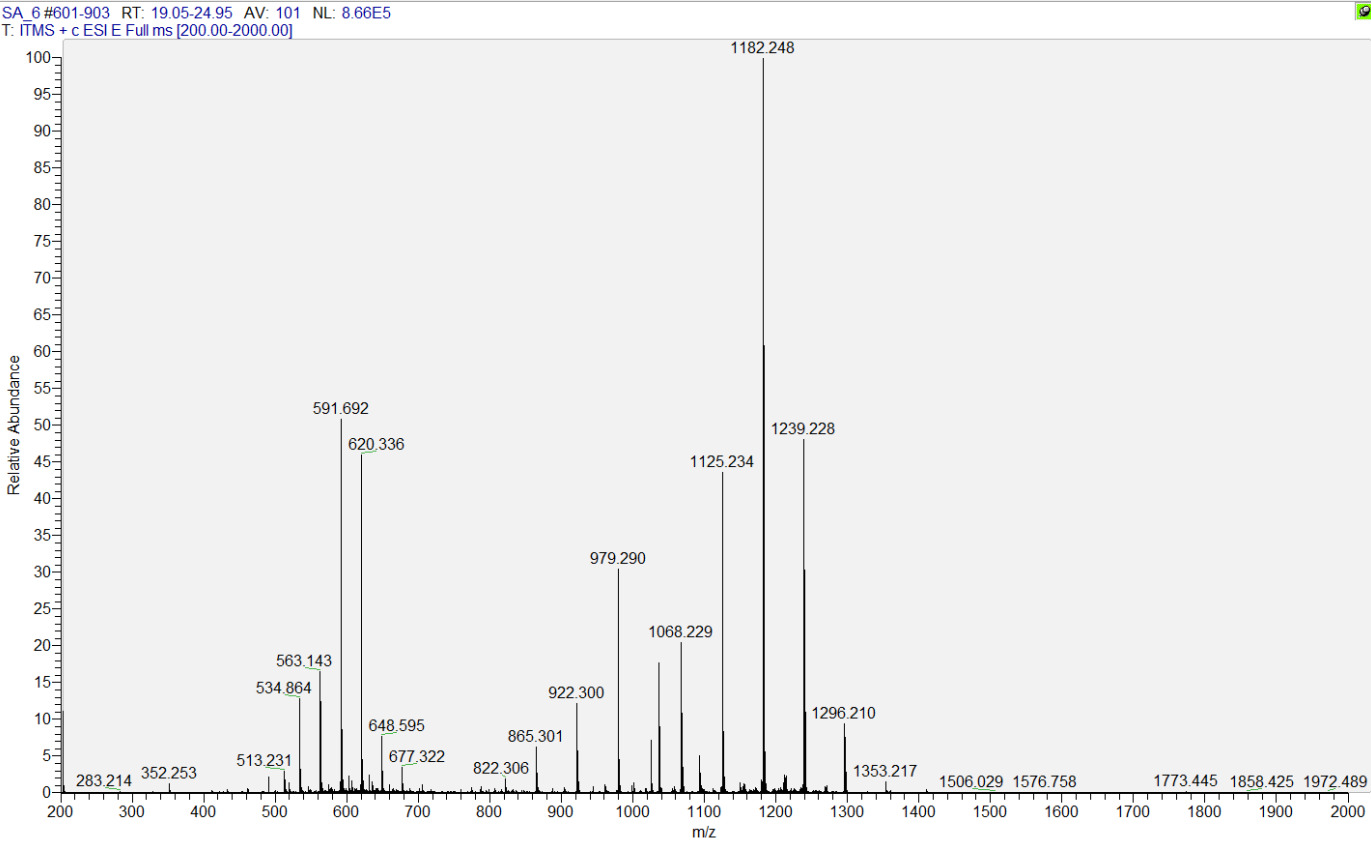

# B LC-MS/MS Peak 6

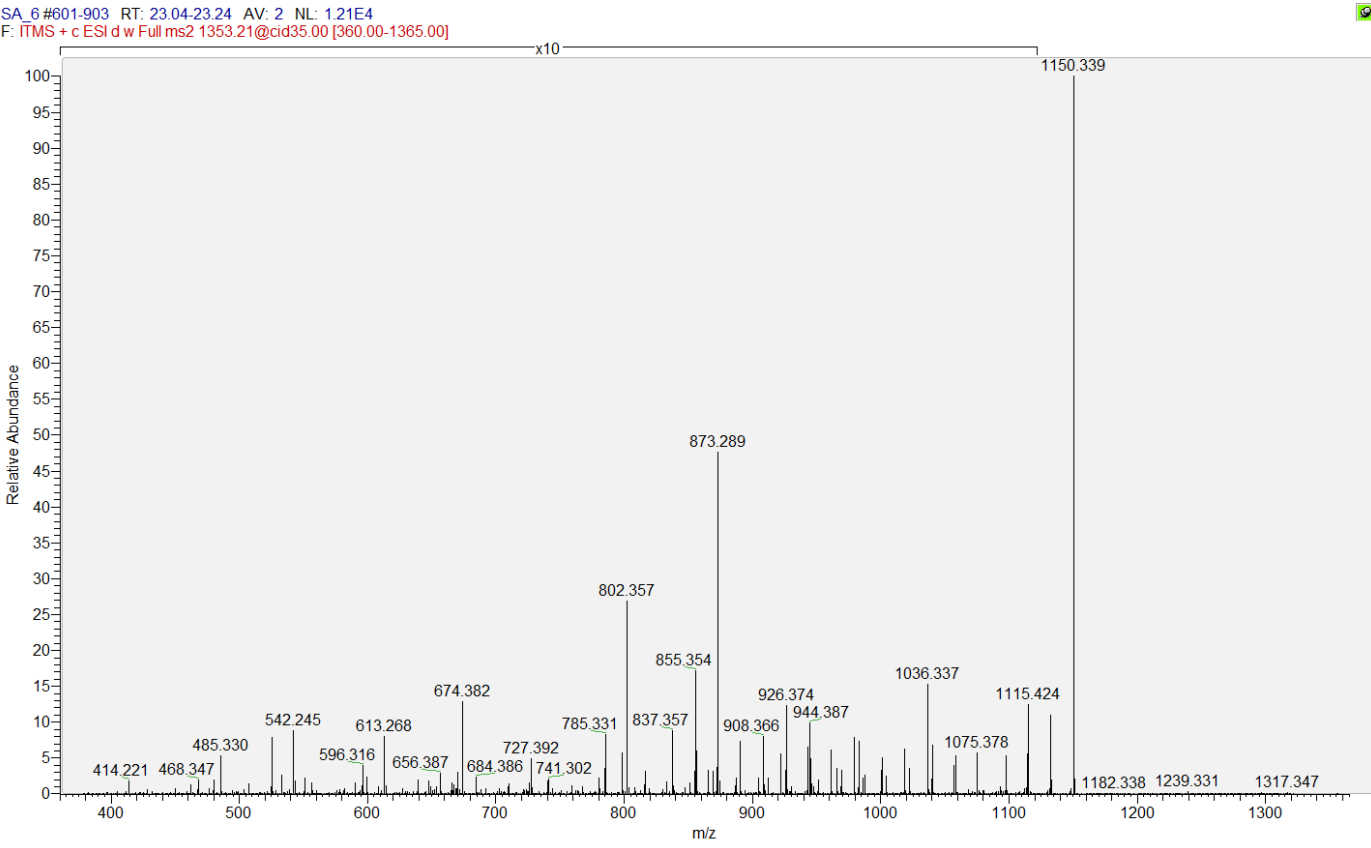

# A LC-MS Peak 7

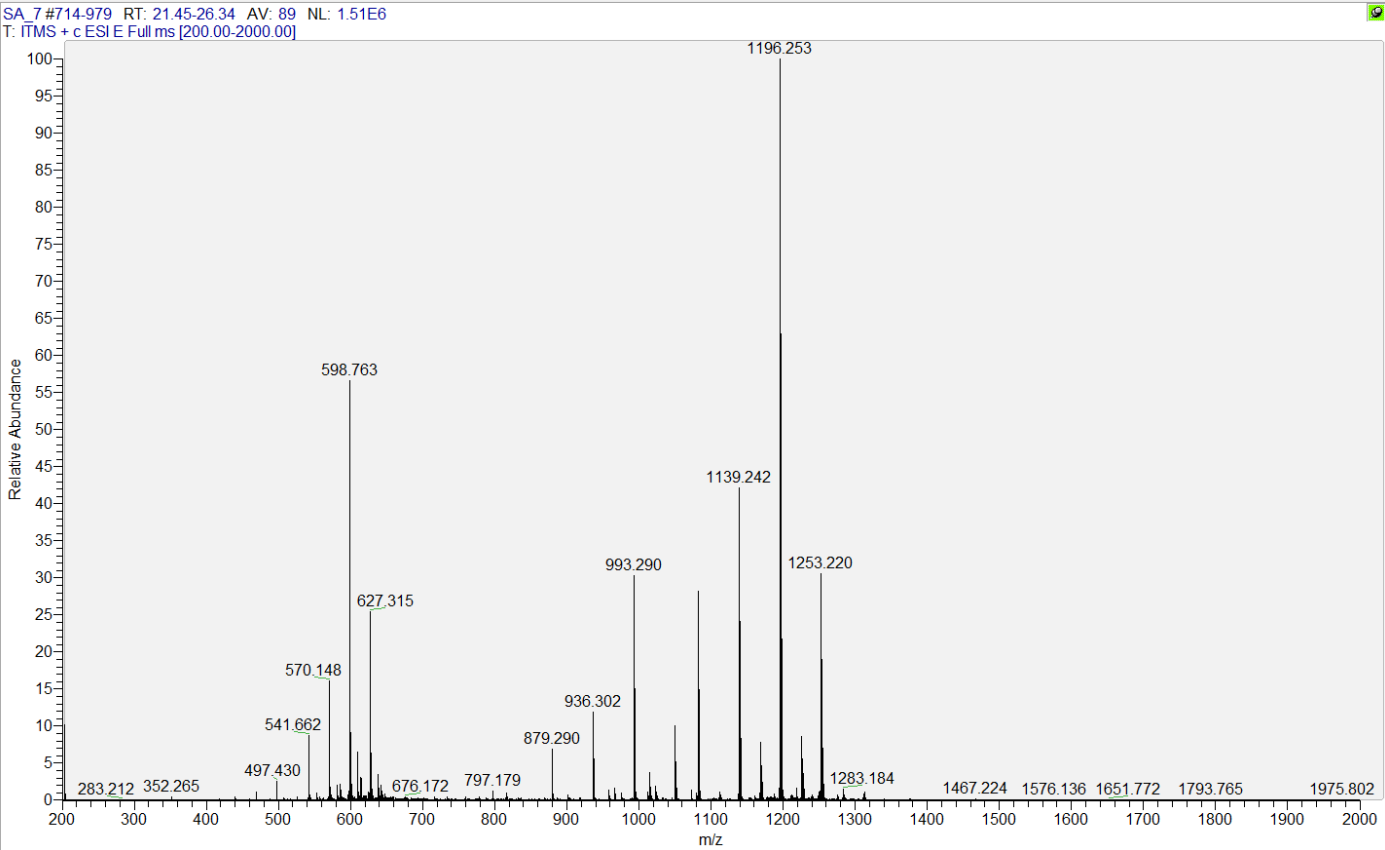

# B LC-MS/MS Peak 7

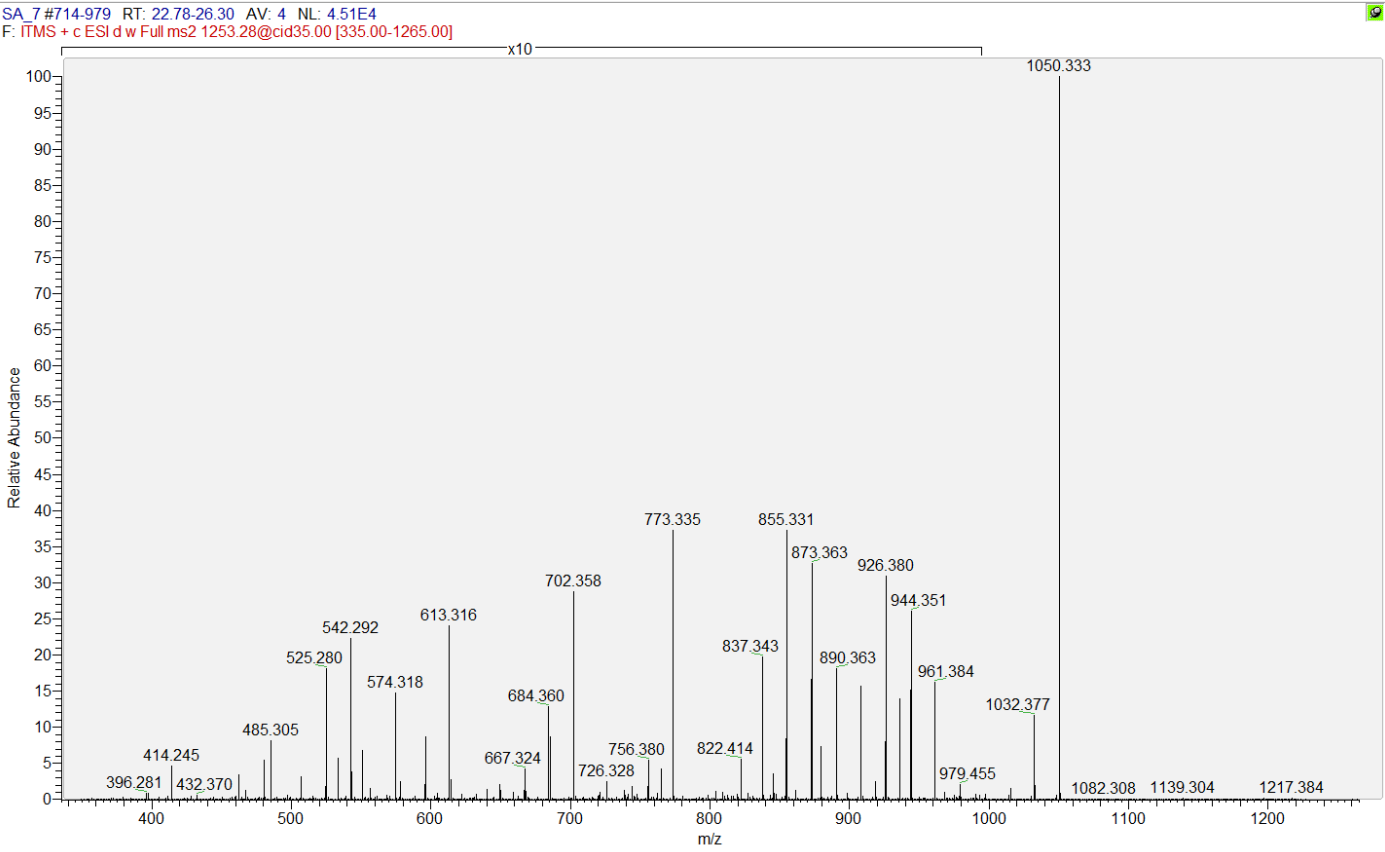

# A LC-MS Peak 8

SA\_8 #705-861 RT: 22.70-26.21 AV: 52 NL: 3.88E5  
T: ITMS + c ESI E Full ms [200.00-2000.00]

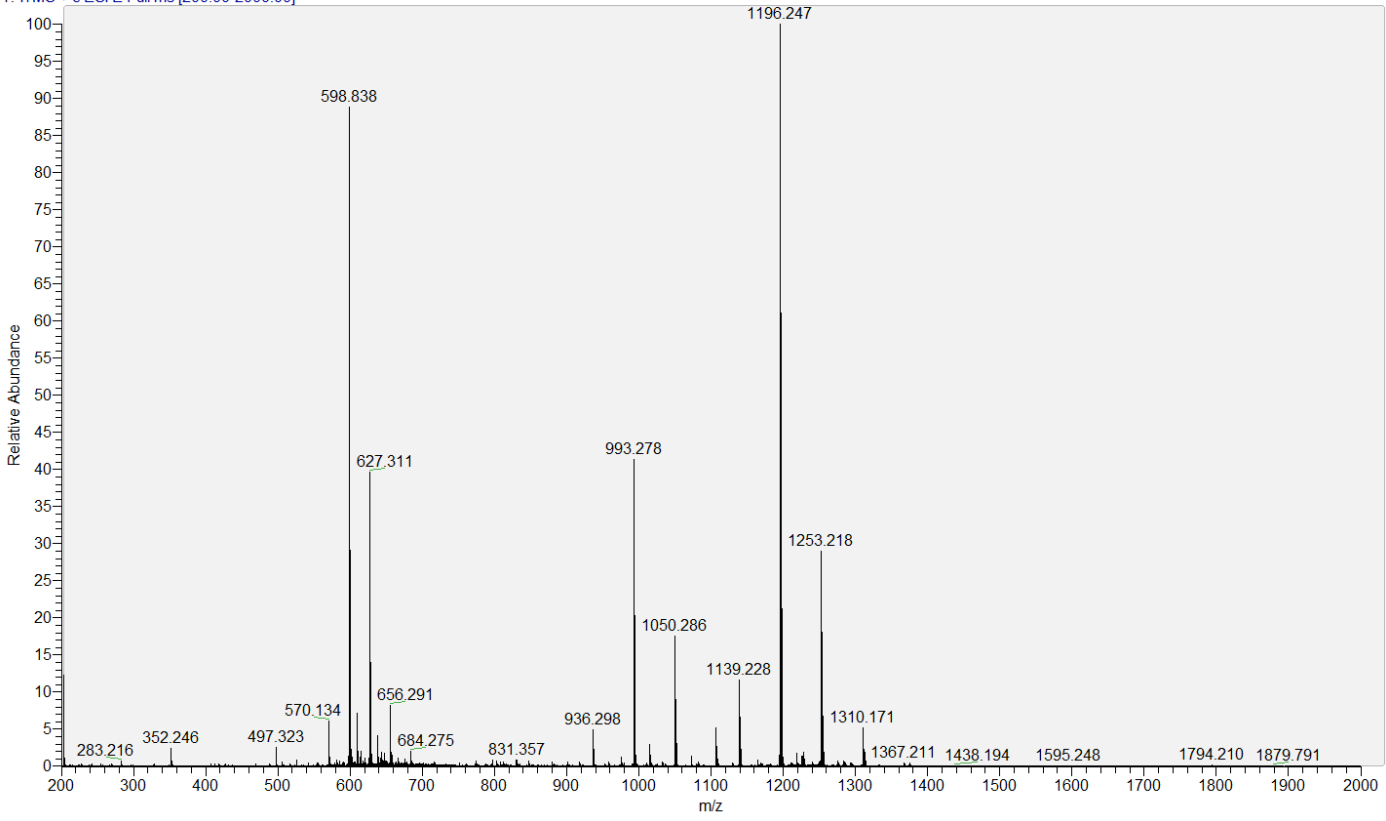

# B LC-MS/MS Peak 8

SA\_8 #705 RT: 25.59 AV: 1 NL: 2.72E4  
F: ITMS + c ESI d w Full ms2 1310.19@cid35.00 [350.00-1325.00]

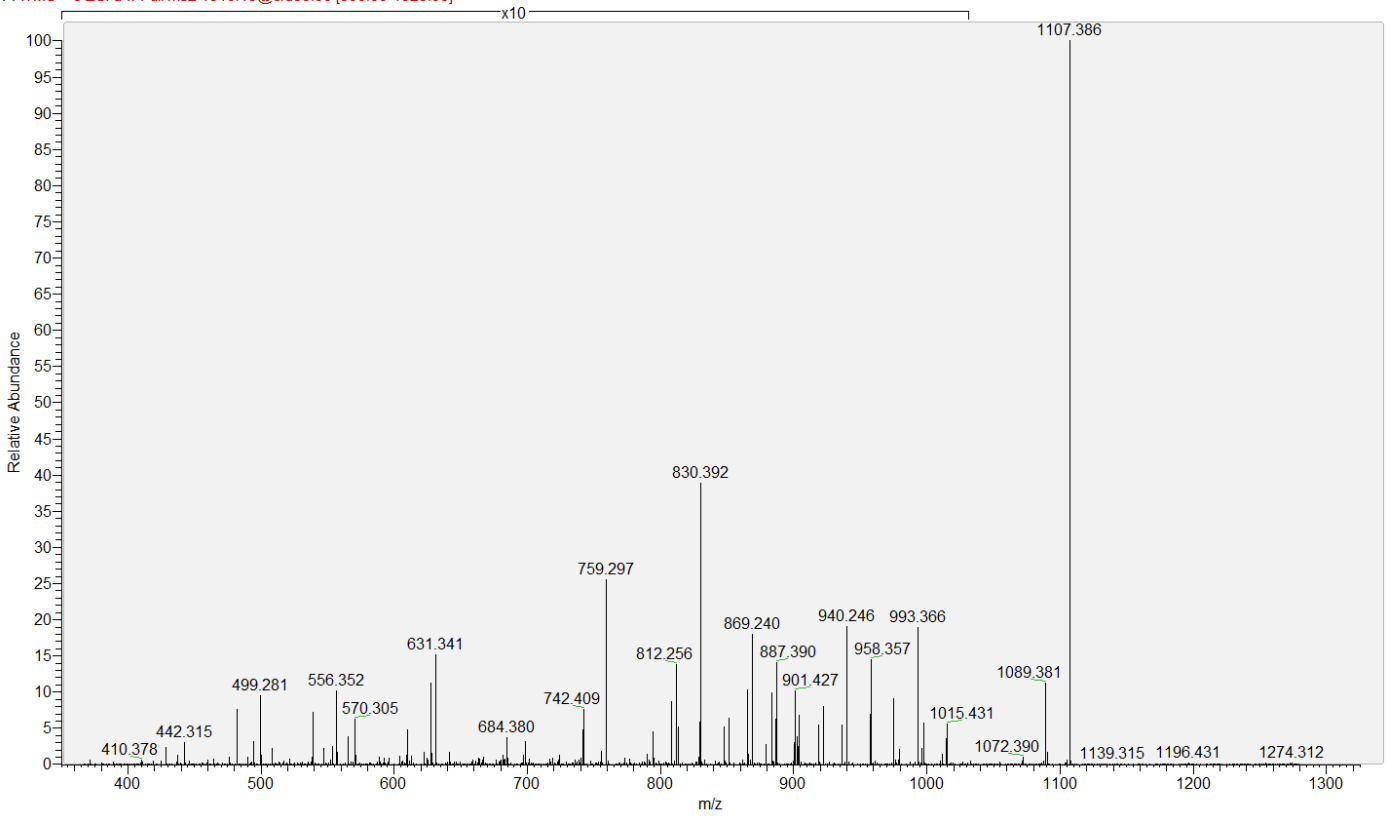



# A LC-MS Peak 9

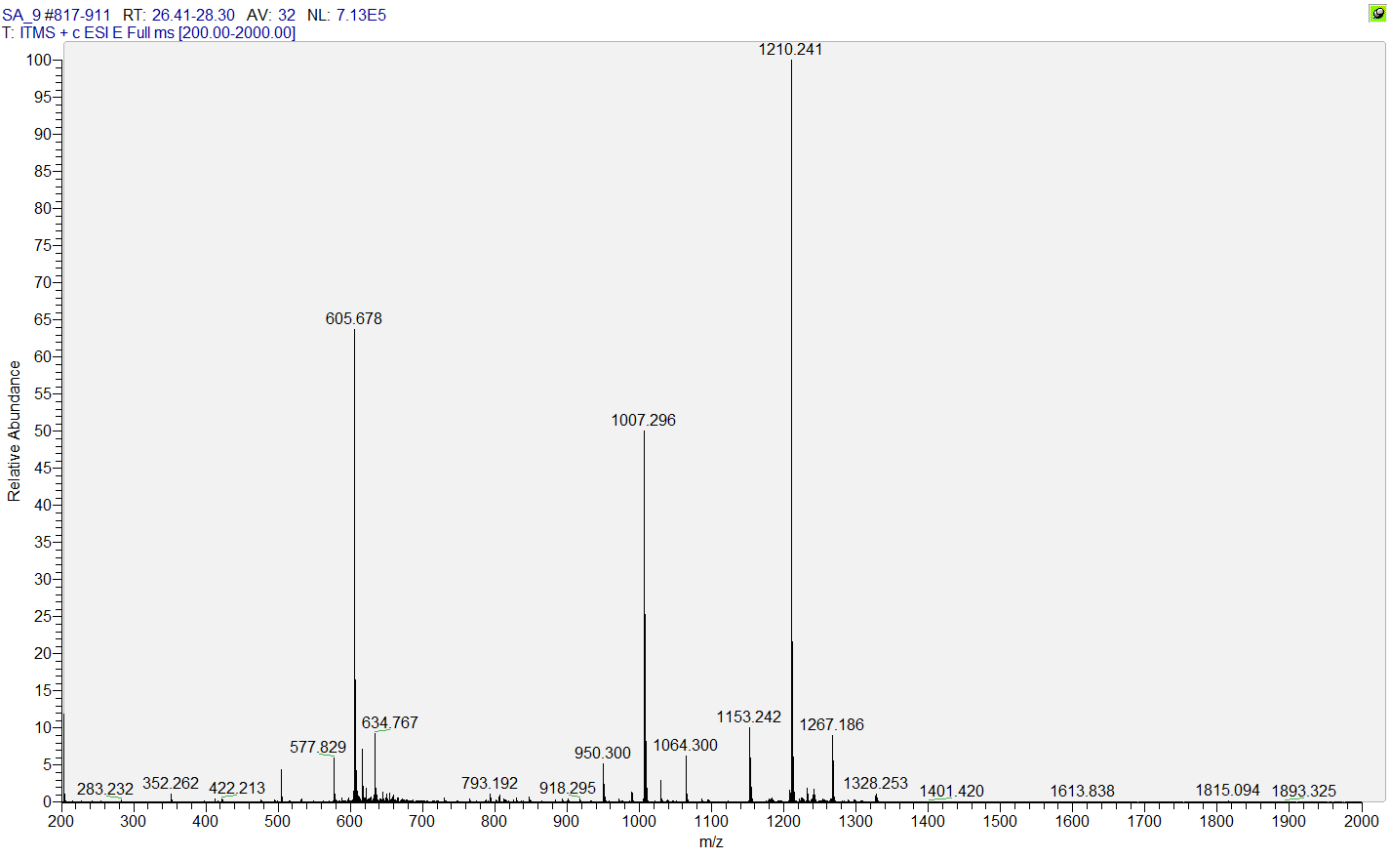

# B LC-MS/MS Peak 9

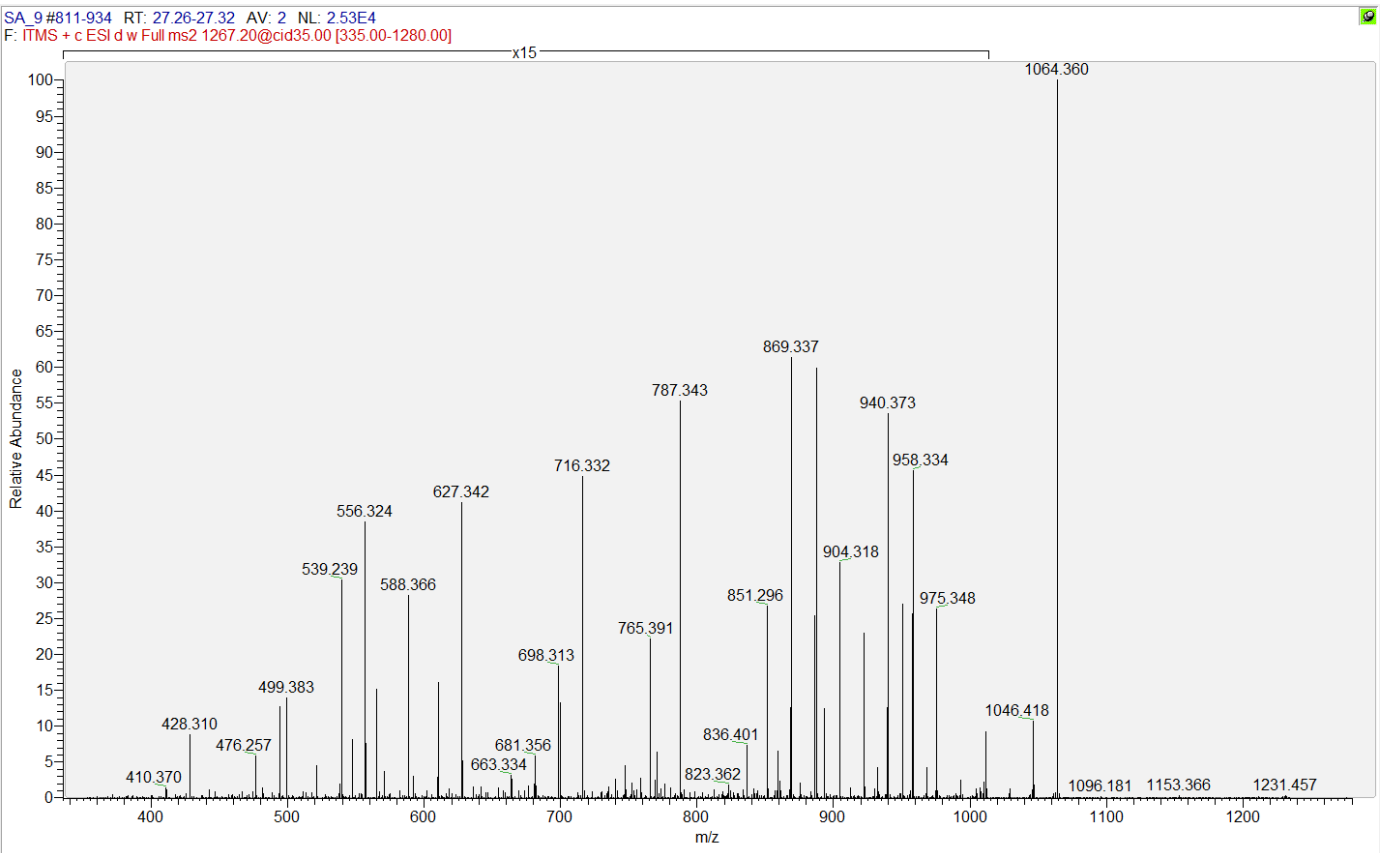

# A LC-MS Peak 10

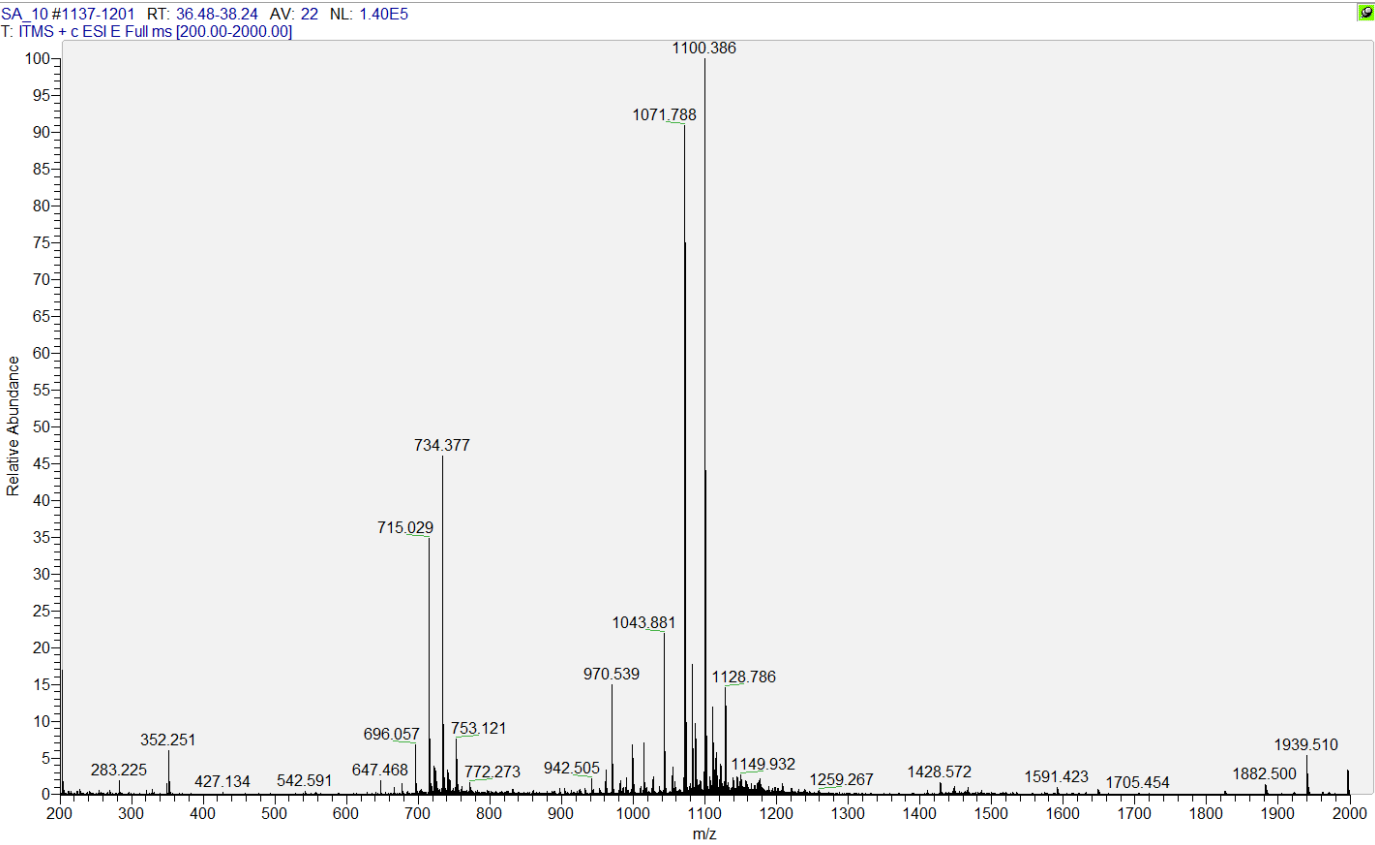

# B LC-MS/MS Peak 10

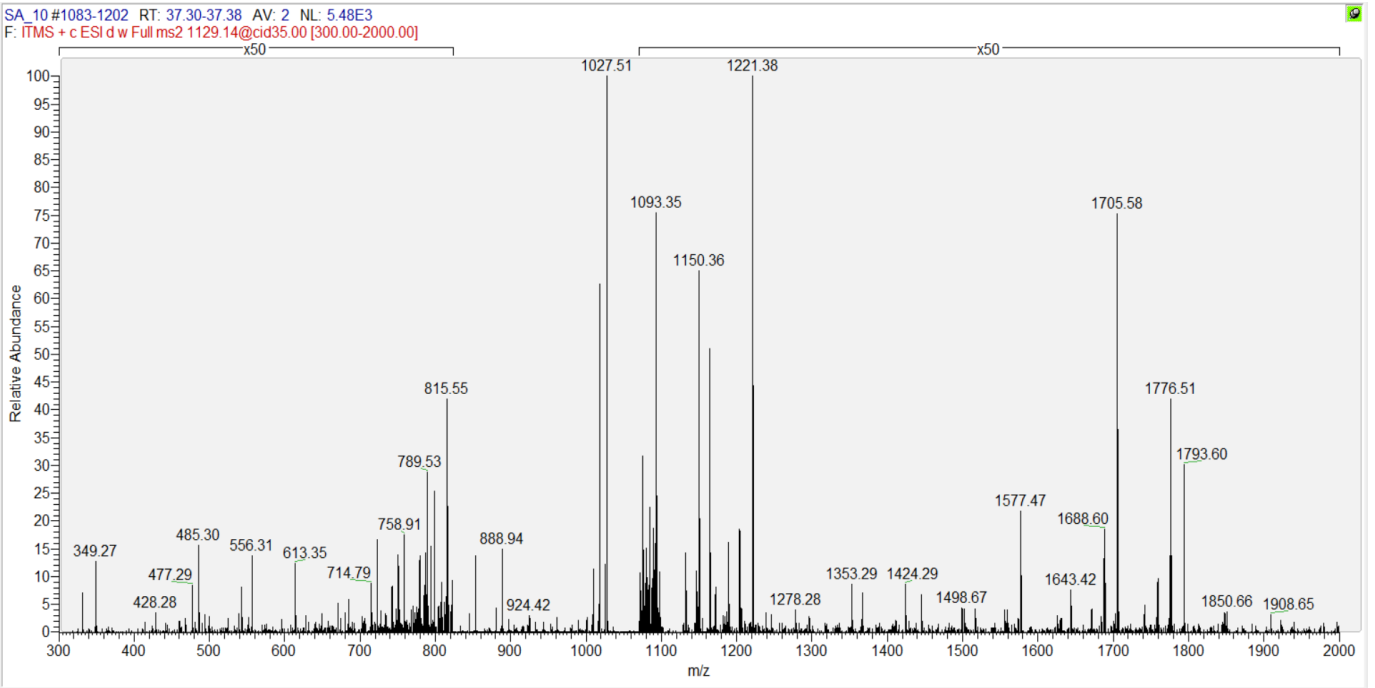

A LC-MS Peak 11

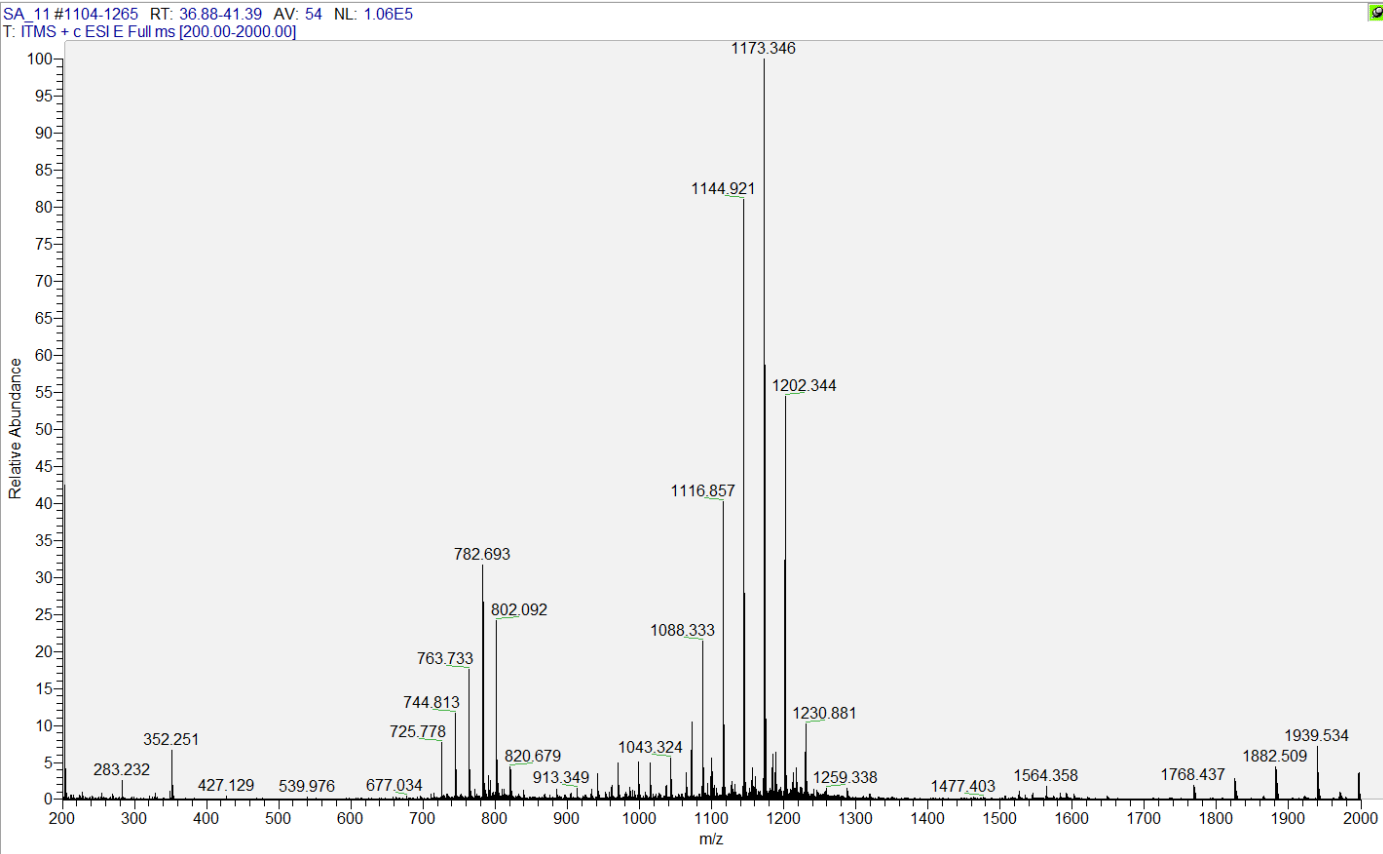

B LC-MS/MS Peak 11

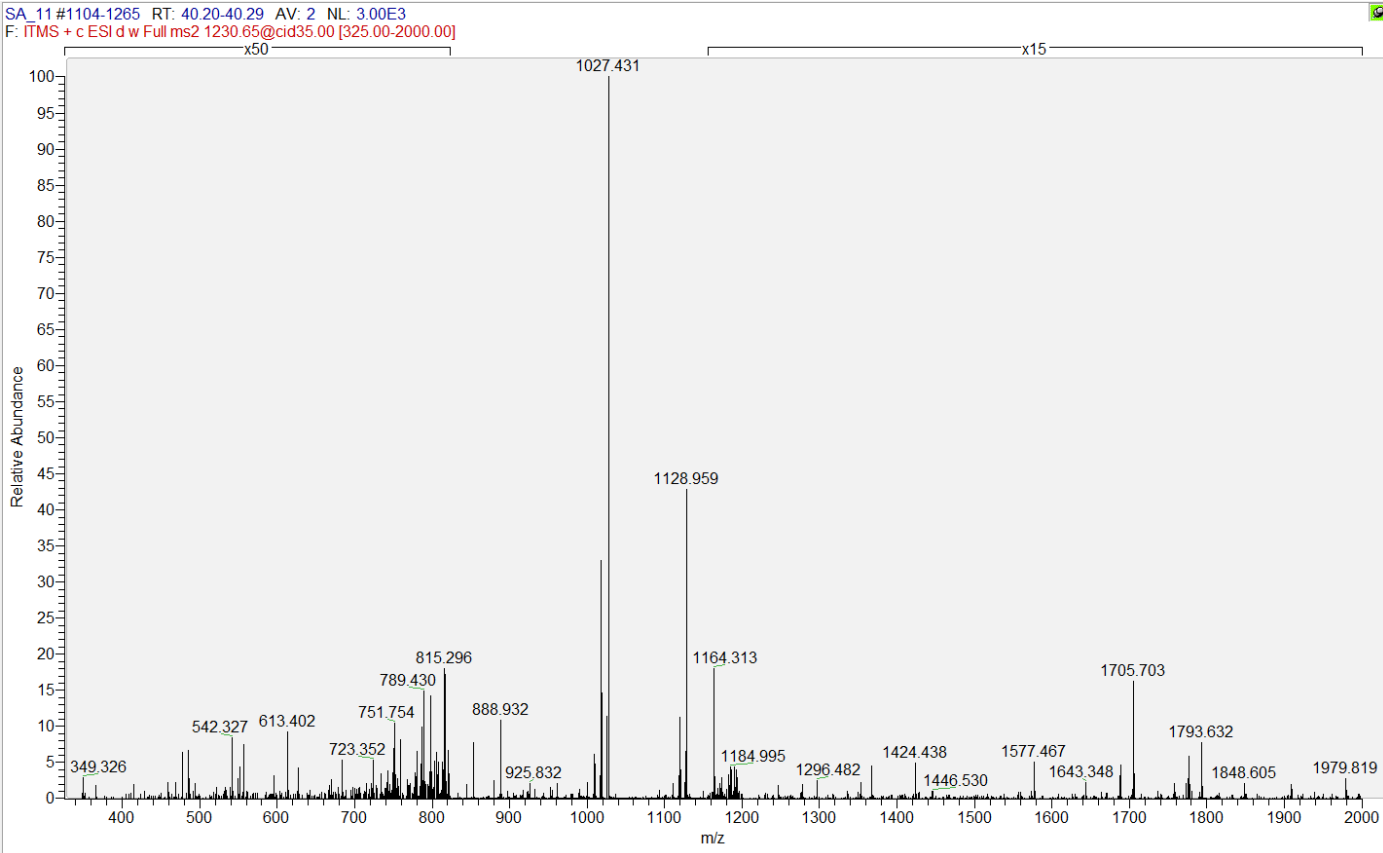

# A LC-MS Peak 12

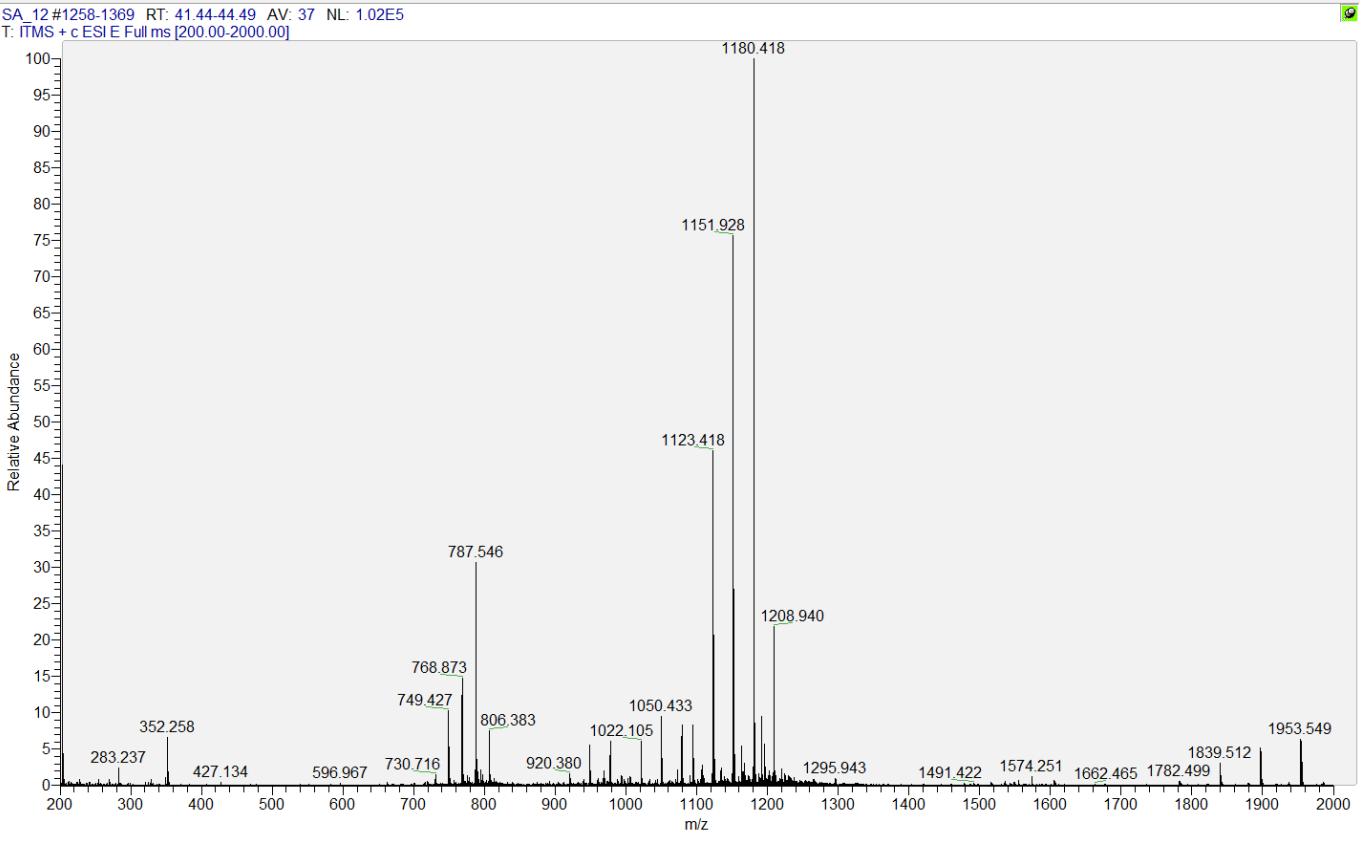

# B LC-MS/MS Peak 12

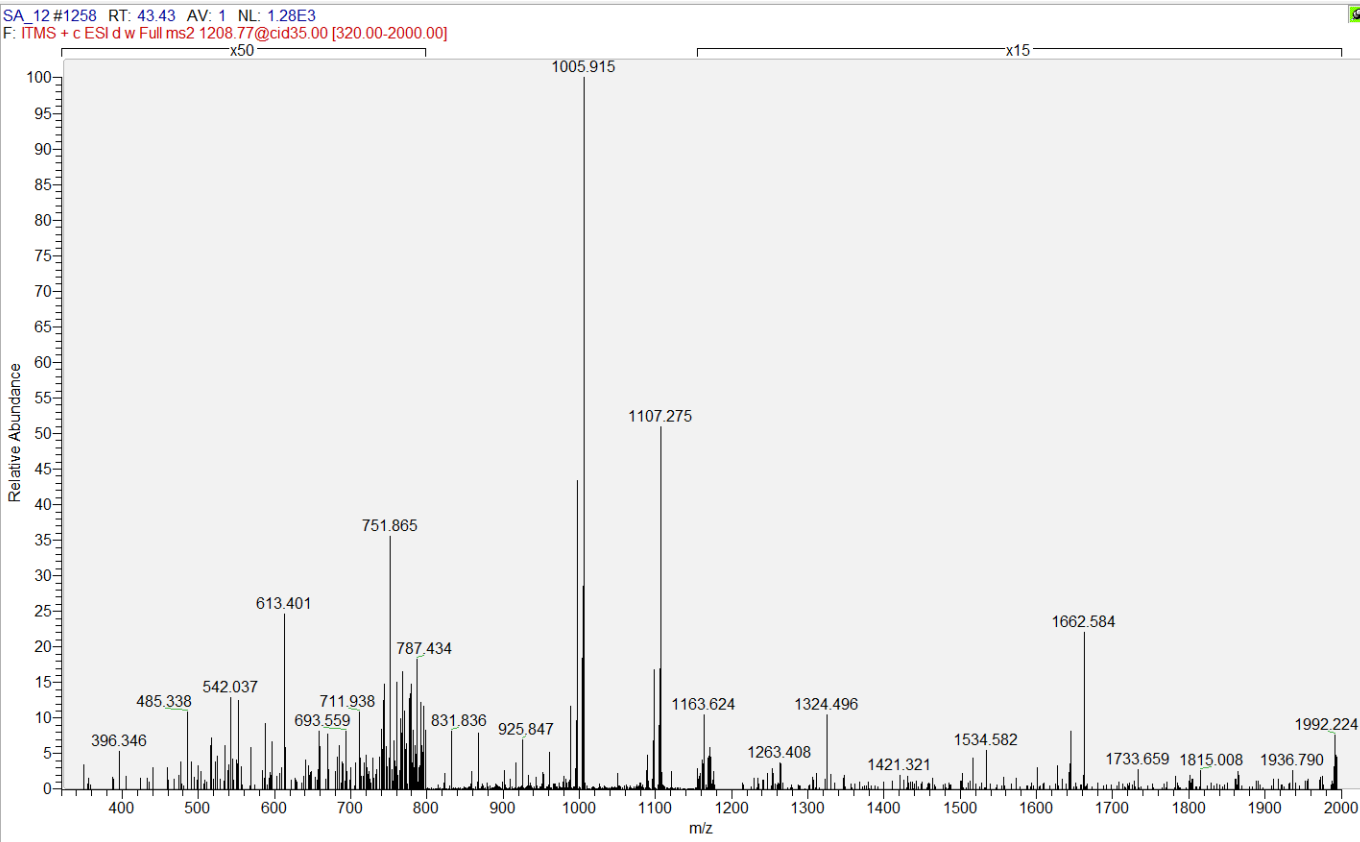

# A LC-MS Peak 13

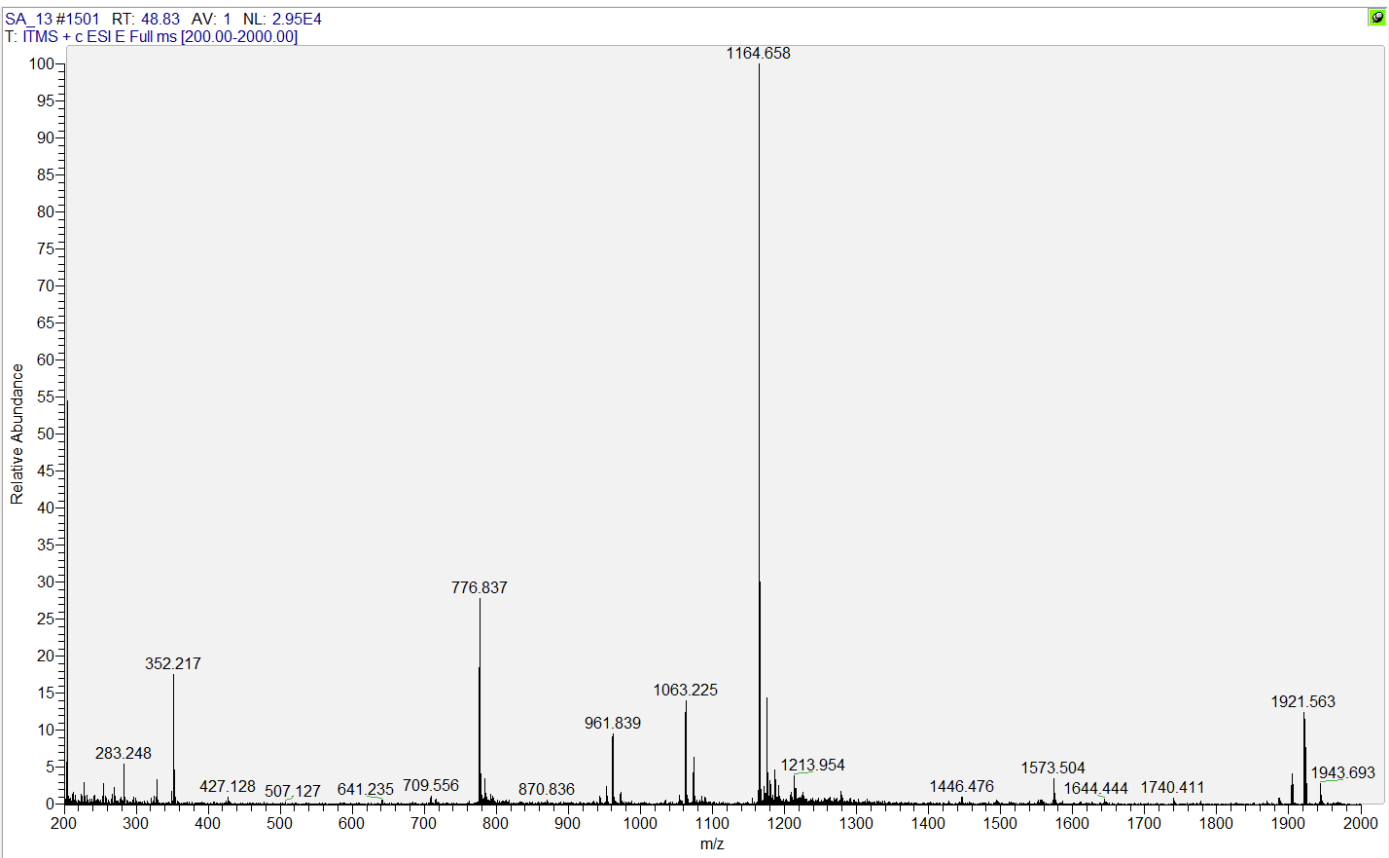

# B LC-MS/MS Peak 13

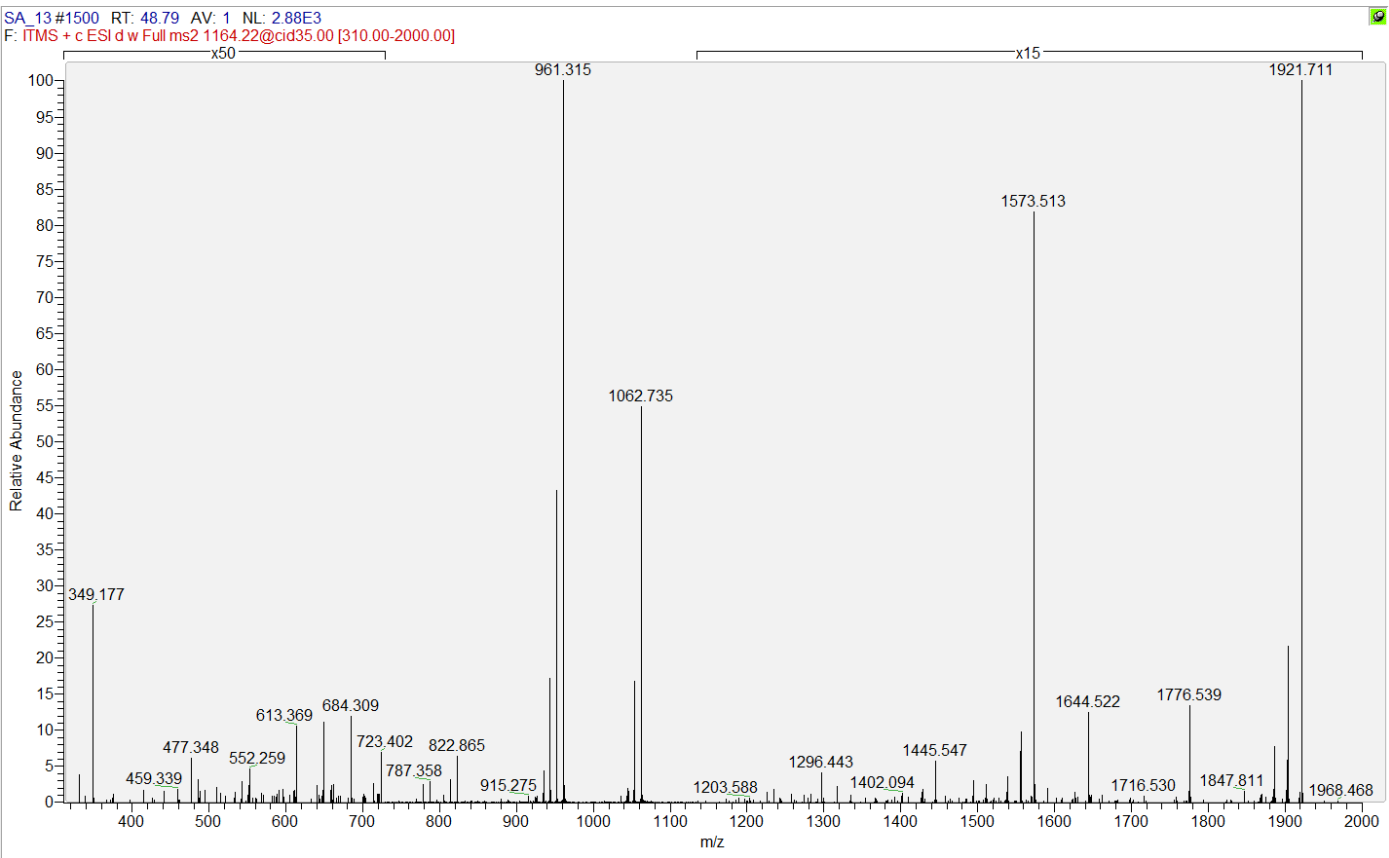

**Figure S4: Identification of JE2 $\Delta$ *mpsABC* PG fragments by LC-MS and LC-MS/MS.** The collected peaks from the lysostaphin-cellosyl double-digested  $\Delta$ *mpsABC* PG profile (Fig. 4a) were analyzed by LC-MS (A) and LC-MS/MS (B). The determined masses of fragmented PG are summarized in Table S3, while the corresponding identified fragments are illustrated in Fig. 4b.
