# Supplementary material for: <em>Staphylococcus aureus </em>Stress Response to Bicarbonate Depletion
Source: Preprints.org preprint supplement (doi:10.20944/preprints202407.2401.v1), 2024-07-30
Supplement: Supplementary file 6 [file Table S5.xlsx]

## Sheet: 5 Dm 4h vs JE 4h
Short name UID	Function	baseMean	log2FoldChange	mutant vs WT
Colonne2	Colonne3	Colonne4	Colonne5	Colonne6
B7H15_00750	cell-wall-anchored protein SasD	674.223	4.77259	-27.3333
B7H15_01480	hypothetical protein	45.4124	1.60703	-3.04624
B7H15_01520	hypothetical protein	373.763	1.64891	-3.13598
B7H15_01610	hypothetical protein	153.727	3.0745	-8.42398
B7H15_02280	myeloperoxidase inhibitor SPIN	5560.57	3.21328	-9.27456
B7H15_03415	hypothetical protein	6876.53	2.18816	-4.55723
B7H15_04405	hypothetical protein	358.539	2.4144	-5.33099
B7H15_06015	hypothetical protein	132.866	4.21116	-18.5219
B7H15_06320	hypothetical protein	371.609	2.921	-7.57371
B7H15_06835	hypothetical protein	21.3971	1.83216	-3.56069
B7H15_06845	hypothetical protein	22.0053	1.81563	-3.52013
B7H15_08625	hypothetical protein	3880.3	1.62708	-3.08887
B7H15_12880	hypothetical protein	176.308	1.8634	-3.63865
B7H15_13800	hypothetical protein	363.584	4.50867	-22.7638
B7H15_14385	TIGR04197 family type VII secretion effector	53.6774	2.43711	-5.41555
B7H15_15045	peptide resistance ABC transporter activity modulator VraH	10.6961	1.74576	-3.35371
B7H15_04410	hypothetical protein	98.3152	3.20874	-9.24542
B7H15_12305	hypothetical protein	741.68	1.98503	-3.95871
B7H15_02000	hypothetical protein	71.6246	-1.75954	3.38589
B7H15_03455	hypothetical protein	88.6697	-2.80543	6.99066
B7H15_03815	hypothetical protein	3422.57	-1.60912	3.05065
B7H15_03865	hypothetical protein	283.892	-1.74143	3.34365
B7H15_03885	hypothetical protein	778.971	-2.27815	4.85056
B7H15_04425	hypothetical protein	80.6725	-2.89068	7.41619
B7H15_04495	hypothetical protein	1280.42	-1.92565	3.79907
B7H15_04615	helix-turn-helix domain-containing protein	198.248	-3.4757	11.1247
B7H15_04620	hypothetical protein	90.1575	-3.63037	12.3837
B7H15_04625	hypothetical protein	59.2076	-3.67033	12.7315
B7H15_04630	hypothetical protein	163.909	-2.98719	7.92925
B7H15_04645	hypothetical protein	58.0639	-2.07707	4.21949
B7H15_07050	hypothetical protein	164.276	-2.74847	6.72005
B7H15_08050	hypothetical protein	28.6355	-3.16571	8.97374
B7H15_08055	hypothetical protein	9.8774	-3.27407	9.6737
B7H15_09560	YtxH domain-containing protein	3273.74	-2.07031	4.19976
B7H15_09700	hypothetical protein	186.113	-1.62162	3.07721
B7H15_09920	hypothetical protein	681.98	-2.80304	6.97907
B7H15_10740	hypothetical protein	320.985	-2.15852	4.46457
B7H15_10900	hypothetical protein	25.4696	-2.97333	7.85346
B7H15_10925	hypothetical protein	47.5495	-3.24852	9.50391
B7H15_10940	hypothetical protein	63.1238	-3.62593	12.3456
B7H15_10945	HK97 gp10 family phage protein	53.296	-3.82478	14.1701
B7H15_10955	phage head-tail adapter protein	17.473	-2.8339	7.13
B7H15_10985	hypothetical protein	29.6735	-3.37809	10.397
B7H15_11010	hypothetical protein	386.599	-3.40872	10.6201
B7H15_11030	hypothetical protein	48.2131	-3.16277	8.95545
B7H15_11040	hypothetical protein	32.0801	-3.08594	8.49104
B7H15_11085	AAA family ATPase	1626.47	-4.38999	20.9662
B7H15_11125	hypothetical protein	629.737	-4.6694	25.4466
B7H15_11585	heavy-metal-associated domain-containing protein	106.072	-1.62592	3.08639
B7H15_12290	hypothetical protein	125.026	-1.68397	3.21312
B7H15_13740	hypothetical protein	574.299	-3.66849	12.7153
B7H15_13945	DUF2188 domain-containing protein	1770.69	-2.65059	6.27925
B7H15_14475	hypothetical protein	126.603	-2.27775	4.84923
B7H15_14795	hypothetical protein	634.177	-1.63555	3.10707
B7H15_09990	hypothetical protein	21.3213	2.48929	-5.61501
B7H15_11615	hypothetical protein	87.4497	1.591	-3.01259
B7H15_14370	hypothetical protein	80.7102	2.23605	-4.71107
B7H15_03305	hypothetical protein	36.8301	1.84539	-3.59351
B7H15_00045	hypothetical protein	644.443	1.69449	-3.23663
B7H15_01570	type VII secretion substrate EsaC	94.5164	2.57404	-5.95473
B7H15_01575	WXG100 family type VII secretion effector EsxB	96.1275	3.37717	-10.3903
B7H15_01580	DUF5081 family protein	181.71	3.16851	-8.99119
B7H15_01585	hypothetical protein	70.7541	3.63866	-12.4551
B7H15_02110	hypothetical protein	198.175	4.93557	-30.6023
B7H15_02115	hypothetical protein	373.751	3.81435	-14.0681
B7H15_02360	hypothetical protein	125.862	3.84593	-14.3794
B7H15_02365	phenol-soluble modulin PSM-alpha-3	9632.52	8.90613	-479.746
B7H15_03200	hypothetical protein	9599.78	3.23642	-9.42451
B7H15_03280	hypothetical protein	39.7074	1.85562	-3.61907
B7H15_04415	DUF5067 domain-containing protein	292.145	3.66604	-12.6937
B7H15_04445	extracellular matrix protein-binding adhesin Emp	59.573	2.54996	-5.85618
B7H15_04685	DUF4888 domain-containing protein	352.496	2.96118	-7.78759
B7H15_05315	putative holin-like toxin	114.957	2.98768	-7.93196
B7H15_05350	hypothetical protein	73.3508	4.33346	-20.1605
B7H15_05875	iron-regulated surface determinant protein IsdD	129.979	2.5789	-5.97485
B7H15_06000	complement convertase inhibitor Ecb	431.201	2.76795	-6.8114
B7H15_06005	hypothetical protein	14.0659	2.40665	-5.30243
B7H15_06010	formyl peptide receptor-like 1 inhibitory protein	145.375	3.08954	-8.51225
B7H15_06030	hypothetical protein	55.0382	2.27279	-4.83258
B7H15_06045	hypothetical protein	151.821	1.64897	-3.1361
B7H15_06110	hypothetical protein	34.2637	1.69128	-3.22942
B7H15_07035	hypothetical protein	9.49265	2.2339	-4.70404
B7H15_09225	hypothetical protein	67.5535	1.7889	-3.45552
B7H15_09630	hypothetical protein	7.03398	2.19296	-4.57242
B7H15_09790	excalibur calcium-binding domain-containing protein	1535.05	2.68116	-6.4137
B7H15_10810	MAP domain-containing protein	423.967	3.96005	-15.563
B7H15_10820	hypothetical protein	277.022	3.86557	-14.5765
B7H15_11280	delta-lysin family phenol-soluble modulin	106068	8.39366	-336.313
B7H15_11290	cyclic lactone autoinducer peptide	3491.86	3.07839	-8.44674
B7H15_11605	hypothetical protein	46.7916	2.05024	-4.14176
B7H15_11860	hypothetical protein	156.457	1.91078	-3.76013
B7H15_11920	hypothetical protein	453.255	2.24752	-4.74865
B7H15_13415	hypothetical protein	151.617	3.46715	-11.059
B7H15_13860	hypothetical protein	44.1383	1.60377	-3.03937
B7H15_14150	hypothetical protein	13.9766	1.89638	-3.72278
B7H15_14380	hypothetical protein	66.0276	2.5962	-6.04693
B7H15_14565	hypothetical protein	183.444	2.66107	-6.325
B7H15_14700	hypothetical protein	92.1304	1.94005	-3.8372
B7H15_07870	hypothetical protein	7.32217	2.00111	-4.00307
B7H15_09555	hypothetical protein	2427.31	-2.19218	4.56995
B7H15_10735	transposase	87.7443	-1.94813	3.85874
B7H15_04675	terminase small subunit	23.8952	-1.81674	3.52285
B7H15_03135	hypothetical protein	150.158	-2.12936	4.37522
B7H15_03670	hypothetical protein	20.2916	-2.06228	4.17645
B7H15_04220	hypothetical protein	10.259	-1.69956	3.24801
B7H15_04650	hypothetical protein	65.2861	-2.4877	5.60882
B7H15_04655	hypothetical protein	40.7486	-2.42743	5.37935
B7H15_04660	phage capsid protein	477.441	-2.19627	4.58293
B7H15_06285	hypothetical protein	192.968	-2.29032	4.89163
B7H15_08035	hypothetical protein	47.5352	-1.90352	3.74124
B7H15_08325	stressosome-associated protein Prli42	77.753	-1.72681	3.30994
B7H15_08885	hypothetical protein	782.326	-1.81496	3.5185
B7H15_09020	hypothetical protein	206.529	-2.38081	5.20828
B7H15_09550	hypothetical protein	445.254	-1.69896	3.24666
B7H15_10175	hypothetical protein	78.0822	-1.64965	3.13759
B7H15_10930	Ig-like domain-containing protein	28.067	-3.10616	8.61087
B7H15_10960	hypothetical protein	37.4103	-3.78452	13.7802
B7H15_11020	hypothetical protein	63.0466	-3.64341	12.4961
B7H15_11060	hypothetical protein	166.573	-3.92855	15.2269
B7H15_11075	MBL fold metallo-hydrolase	458.843	-4.21998	18.6355
B7H15_11090	hypothetical protein	315.494	-4.30365	19.7482
B7H15_11100	DUF2482 family protein	150.008	-4.53641	23.2058
B7H15_12235	hypothetical protein	4.31734	-2.46	5.50215
B7H15_12270	MAP domain-containing protein	4772.75	-2.3813	5.21005
B7H15_12285	hypothetical protein	7.7653	-1.91881	3.78112
B7H15_12755	hypothetical protein	1364.45	-2.49027	5.61882
B7H15_14225	cell wall inhibition responsive protein CwrA	56.686	-1.64017	3.11703
B7H15_00745	superoxide dismutase	609.647	1.92275	-3.79146
B7H15_05965	succinate dehydrogenase cytochrome b558 subunit	1651.92	1.96676	-3.90891
B7H15_07590	alanine dehydrogenase	62.1707	3.52078	-11.4778
B7H15_07835	ferredoxin	799.573	1.85274	-3.61185
B7H15_13125	L-lactate permease	3193.85	4.69842	-25.9636
B7H15_14575	assimilatory sulfite reductase (NADPH) flavoprotein subunit	1614.96	2.47158	-5.54652
B7H15_01135	FMN-dependent NADH-azoreductase	1012.28	-2.80225	6.97529
B7H15_01865	LLM class flavin-dependent oxidoreductase	1334.16	-2.95455	7.75189
B7H15_05630	cytochrome ubiquinol oxidase subunit I	201.497	-1.97986	3.94456
B7H15_11785	aldehyde dehydrogenase family protein	8683.53	-2.80963	7.01104
B7H15_14030	NAD(P)H-dependent oxidoreductase	2314.37	-1.59158	3.01379
B7H15_01565	type VII secretion protein EssC	977.618	3.28027	-9.71537
B7H15_01765	YSIRK domain-containing triacylglycerol lipase Lip2/Geh	23349.4	4.34586	-20.3345
B7H15_08245	site-specific tyrosine recombinase XerD	1110.45	2.00177	-4.00492
B7H15_14775	serine-rich repeat glycoprotein adhesin SasA	10718.5	4.54897	-23.4086
B7H15_14865	YSIRK domain-containing triacylglycerol lipase Lip1	31779.8	1.84644	-3.59611
B7H15_09720	fluoride efflux transporter CrcB	45.9743	-1.63269	3.1009
B7H15_11260	hypothetical protein	1230.72	-1.98167	3.9495
B7H15_00390	nickel ABC transporter substrate-binding protein	160.074	2.37537	-5.1887
B7H15_00405	ATP-binding cassette domain-containing protein	52.593	2.59732	-6.0516
B7H15_00410	ATP-binding cassette domain-containing protein	51.3504	2.17678	-4.52142
B7H15_00650	2,3-diaminopropionate biosynthesis protein SbnA	28.7947	1.64126	-3.11939
B7H15_01035	branched-chain amino acid transport system II carrier protein	675.377	2.13518	-4.39293
B7H15_01110	ABC transporter permease	259.088	3.89963	-14.9247
B7H15_01115	ABC transporter permease	250.037	3.86408	-14.5614
B7H15_01120	peptide ABC transporter substrate-binding protein	498.769	3.93152	-15.2582
B7H15_01125	gamma-glutamyltransferase	537.673	3.31242	-9.93432
B7H15_02895	serine O-acetyltransferase	1270.64	2.31435	-4.97381
B7H15_04055	peptide MFS transporter	2163.29	1.81059	-3.50786
B7H15_06920	low specificity L-threonine aldolase	201.753	2.02783	-4.07791
B7H15_07585	bifunctional threonine ammonia-lyase/L-serine ammonia-lyase TdcB	59.4522	2.42313	-5.36332
B7H15_08805	5-oxoprolinase subunit PxpB	334.264	1.92061	-3.78583
B7H15_09470	bifunctional 3-deoxy-7-phosphoheptulonate synthase/chorismate mutase	1258.21	1.75472	-3.3746
B7H15_09880	serine protease SplF	268.029	3.33305	-10.0774
B7H15_09885	serine protease SplE	287.997	3.56082	-11.8009
B7H15_09890	serine protease SplD	372.815	3.17543	-9.03442
B7H15_09895	serine protease SplC	352.609	3.15011	-8.8772
B7H15_09900	serine protease SplB	322.566	3.90662	-14.9972
B7H15_09905	serine protease SplA	269.933	6.3665	-82.5104
B7H15_10610	sodium/proline symporter PutP	846.423	1.81584	-3.52065
B7H15_11420	3-isopropylmalate dehydratase small subunit	103.597	1.71161	-3.27526
B7H15_11425	threonine ammonia-lyase IlvA	233.135	1.85802	-3.62511
B7H15_12135	staphyloferrin A export MFS transporter	211.205	2.18001	-4.53155
B7H15_13720	staphylopine-dependent metal ABC transporter substrate-binding protein CntA	200.419	1.85352	-3.6138
B7H15_01270	ABC transporter substrate-binding protein	484.866	1.67329	-3.18941
B7H15_06970	hypothetical protein	357.994	2.23069	-4.69358
B7H15_14690	zinc metalloproteinase aureolysin	882.676	5.47942	-44.6139
B7H15_01860	VOC family protein	704.892	-2.74797	6.71772
B7H15_02865	protein arginine kinase	2090.67	-2.50575	5.67943
B7H15_03130	MFS transporter	2319.91	-1.99591	3.98867
B7H15_03185	APC family permease	3457.41	-2.53819	5.8086
B7H15_03880	multidrug efflux MFS transporter NorA	451.716	-2.41236	5.32344
B7H15_06820	type I glutamate--ammonia ligase	3470.55	-1.74372	3.34899
B7H15_07225	phosphoribosylanthranilate isomerase	8.70916	-1.7751	3.42262
B7H15_09160	amino acid permease	1210.73	-2.05367	4.15161
B7H15_11190	ArgE/DapE family deacylase	2083.76	-2.67317	6.37831
B7H15_12940	formimidoylglutamase	1684.78	-1.9052	3.74561
B7H15_13585	MFS transporter	1147.8	-1.68254	3.20993
B7H15_13380	multidrug efflux MFS transporter MdeA	750.574	-2.00592	4.01645
B7H15_00135	LPXTG-anchored adenosine synthase AdsA	392.236	3.52355	-11.4999
B7H15_01310	nucleoside hydrolase	205.409	2.08846	-4.25293
B7H15_02845	pyridoxal 5\\'-phosphate synthase glutaminase subunit PdxT	1335.59	3.51477	-11.4301
B7H15_02850	NupC/NupG family nucleoside CNT transporter	830.368	1.87702	-3.67315
B7H15_03015	ribulokinase	184.827	1.74403	-3.3497
B7H15_03965	7-cyano-7-deazaguanine synthase QueC	140.923	3.34663	-10.1727
B7H15_05520	5-(carboxyamino)imidazole ribonucleotide synthase	2010.57	3.60523	-12.1698
B7H15_05525	phosphoribosylaminoimidazolesuccinocarboxamide synthase	669.74	3.69778	-12.976
B7H15_05530	phosphoribosylformylglycinamidine synthase subunit PurS	564.39	3.64015	-12.4679
B7H15_05535	phosphoribosylformylglycinamidine synthase I	1385.5	3.80044	-13.9331
B7H15_05540	phosphoribosylformylglycinamidine synthase subunit PurL	3984.43	3.7294	-13.2636
B7H15_05545	amidophosphoribosyltransferase	2623.4	3.61834	-12.2808
B7H15_05550	phosphoribosylformylglycinamidine cyclo-ligase	1925.4	3.60192	-12.1419
B7H15_05555	phosphoribosylglycinamide formyltransferase	1149.47	3.50621	-11.3625
B7H15_05560	bifunctional phosphoribosylaminoimidazolecarboxamide formyltransferase/IMP cyclohydrolase	3500.01	3.43066	-10.7828
B7H15_05565	phosphoribosylamine--glycine ligase	2945.79	3.37526	-10.3766
B7H15_09440	formate--tetrahydrofolate ligase	9689.29	2.65379	-6.29319
B7H15_05515	5-(carboxyamino)imidazole ribonucleotide mutase	549.445	3.59975	-12.1236
B7H15_04045	diacylglycerol kinase family lipid kinase	2314.33	-3.00133	8.00736
B7H15_06250	uracil permease	337.229	-2.24625	4.74447
B7H15_06255	aspartate carbamoyltransferase catalytic subunit	422.436	-2.43991	5.4261
B7H15_06260	dihydroorotase	653.468	-2.58714	6.00908
B7H15_06265	carbamoyl phosphate synthase small subunit	538.651	-2.7786	6.86184
B7H15_06270	carbamoyl-phosphate synthase large subunit	1809.07	-2.58812	6.01317
B7H15_06275	orotidine-5\\'-phosphate decarboxylase	418.002	-2.63736	6.22191
B7H15_06280	orotate phosphoribosyltransferase	318.817	-2.88778	7.40129
B7H15_06775	glycerol kinase GlpK	424.004	-2.13281	4.38571
B7H15_01055	glucose-specific PTS transporter subunit IIBC	1117.08	2.10673	-4.30713
B7H15_01065	N-acetylmuramic acid 6-phosphate etherase	1630.4	1.70237	-3.25435
B7H15_01150	extracellular solute-binding protein	88.3454	2.5127	-5.70687
B7H15_01460	D-ribose pyranase	171.775	2.50857	-5.69056
B7H15_01855	glycerol-3-phosphate transporter	188.102	1.74389	-3.34937
B7H15_08295	alpha-glucosidase	729.618	1.96964	-3.91669
B7H15_13190	sucrose-specific PTS transporter subunit IIBC	283.719	2.23616	-4.71143
B7H15_13995	fructose-1,6-bisphosphatase	1573.56	1.90752	-3.75165
B7H15_14705	BglG family transcription antiterminator	124.621	1.65394	-3.14693
B7H15_14710	PTS fructose transporter subunit IIABC	270.288	1.63188	-3.09917
B7H15_14920	polysaccharide deacetylase family protein	206.92	1.80596	-3.49662
B7H15_14955	SMP-30/gluconolactonase/LRE family protein	212.354	1.60375	-3.03932
B7H15_04500	phosphoglycerate mutase family protein	361.989	2.02547	-4.07124
B7H15_01430	glucose PTS transporter subunit IIA	52.2829	-1.64418	3.12569
B7H15_03115	3-hexulose-6-phosphate synthase	4573.27	-3.26989	9.64576
B7H15_11900	SDR family oxidoreductase	1666.05	-2.34054	5.06493
B7H15_11960	BglG family transcription antiterminator	1203.91	-3.31002	9.91779
B7H15_11965	PTS sugar transporter subunit IIA	770.107	-4.20261	18.4125
B7H15_11970	mannitol-1-phosphate 5-dehydrogenase	1337.49	-3.58773	12.023
B7H15_14390	fructosamine kinase family protein	608.82	-2.03706	4.10408
B7H15_01005	4\\'-phosphopantetheinyl transferase superfamily protein	2542.84	1.82466	-3.54222
B7H15_01455	ribokinase	424.833	2.33533	-5.04667
B7H15_02840	pyridoxal 5\\'-phosphate synthase lyase subunit PdxS	1150.87	3.56167	-11.8078
B7H15_03955	7-carboxy-7-deazaguanine synthase QueE	411.151	2.83859	-7.15322
B7H15_03960	6-carboxytetrahydropterin synthase QueD	259.812	2.71406	-6.56167
B7H15_14570	NAD(P)-binding protein	1024.41	2.71894	-6.58389
B7H15_00980	acyl-CoA/acyl-ACP dehydrogenase	3924.19	2.76125	-6.77982
B7H15_01250	acyl-CoA dehydrogenase family protein	360.965	1.72909	-3.31519
B7H15_01260	acyl CoA:acetate/3-ketoacid CoA transferase	1001.2	2.373	-5.18018
B7H15_08790	acetyl-CoA carboxylase biotin carboxylase subunit	926.638	1.83151	-3.5591
B7H15_00375	alpha/beta hydrolase	1631.25	-2.13613	4.39583
B7H15_03425	alpha/beta hydrolase	1235.45	-3.04956	8.27959
B7H15_07480	phosphatase PAP2 family protein	916.125	-1.79674	3.47435
B7H15_12910	SDR family oxidoreductase	3084.95	-2.76444	6.79485
B7H15_13745	short-chain dehydrogenase	1116.63	-3.06345	8.35968
B7H15_00050	serine--tRNA ligase	820.024	2.02438	-4.06817
B7H15_00140	23S rRNA (pseudouridine(1915)-N(3))-methyltransferase RlmH	114.84	2.29689	-4.91399
B7H15_02900	cysteine--tRNA ligase	4331.46	2.06052	-4.17136
B7H15_02905	Mini-ribonuclease 3	1660.22	2.10267	-4.29503
B7H15_02910	23S rRNA (guanosine(2251)-2\\'-O)-methyltransferase RlmB	2430.97	2.02425	-4.06779
B7H15_15100	50S ribosomal protein L34	804.778	1.74753	-3.35784
B7H15_02635	RidA family protein	4816.37	-1.59186	3.01438
B7H15_06515	methylenetetrahydrofolate--tRNA-(uracil(54)-C(5))-methyltransferase (FADH(2)-oxidizing) TrmFO	2672.06	-1.96535	3.90508
B7H15_09565	rRNA pseudouridine synthase	1036.54	-2.00102	4.00284
B7H15_00630	HTH-type transcriptional regulator SarS	320.415	1.89503	-3.7193
B7H15_02920	RNA polymerase sigma factor	1710.57	2.20612	-4.61431
B7H15_03895	DeoR/GlpR family DNA-binding transcription regulator	962.106	1.64681	-3.1314
B7H15_03935	response regulator transcription factor SaeR	4057.2	2.83452	-7.13308
B7H15_04460	cold-shock protein	3542.37	3.52463	-11.5085
B7H15_05035	LysR family transcriptional regulator	34.3094	2.38124	-5.20984
B7H15_05440	MarR family transcriptional regulator	58.2587	1.71971	-3.29371
B7H15_05700	XRE family transcriptional regulator	95.9247	1.64377	-3.12481
B7H15_08300	LacI family DNA-binding transcriptional regulator	200.681	2.47431	-5.55703
B7H15_09450	hypothetical protein	267.146	1.97408	-3.92878
B7H15_11285	accessory gene regulator AgrB	11903.4	3.15648	-8.91653
B7H15_11300	LytTR family DNA-binding domain-containing protein	17618.4	3.24032	-9.45001
B7H15_11555	response regulator transcription factor	93.8146	2.11455	-4.33054
B7H15_14830	ica operon transcriptional regulator IcaR	1098.59	4.37238	-20.7117
B7H15_15050	cold-shock protein	2742.59	1.92203	-3.78957
B7H15_13885	HTH-type transcriptional regulator SarT	11.6357	2.44896	-5.46023
B7H15_02855	CtsR family transcriptional regulator	817.274	-2.53942	5.81355
B7H15_03785	GNAT family N-acetyltransferase	59.3181	-2.34463	5.07929
B7H15_04310	DNA-binding protein WhiA	3105.04	-1.86703	3.6478
B7H15_04610	helix-turn-helix domain-containing protein	12.1365	-3.75205	13.4735
B7H15_06815	MerR family transcriptional regulator	645.855	-1.79314	3.46568
B7H15_07490	GNAT family N-acetyltransferase	329.903	-1.80143	3.48565
B7H15_08675	heat-inducible transcriptional repressor HrcA	1727.3	-3.15441	8.90371
B7H15_09690	RNA polymerase sigma factor SigS	92.3938	-1.8963	3.72256
B7H15_11135	helix-turn-helix domain-containing protein	319.249	-4.79168	27.6973
B7H15_11220	GNAT family N-acetyltransferase	272.24	-1.83376	3.56466
B7H15_11470	RNA polymerase sigma factor SigB	3637.32	-1.71537	3.2838
B7H15_00005	chromosomal replication initiator protein DnaA	1969.35	2.50278	-5.66778
B7H15_00010	DNA polymerase III subunit beta	2279	1.73415	-3.32683
B7H15_00215	recombinase family protein	154.328	2.18592	-4.55016
B7H15_00260	HNH endonuclease	51.53	2.4417	-5.43281
B7H15_00380	IS110 family transposase	316.538	1.787	-3.45096
B7H15_01085	type I restriction endonuclease subunit R	1027.59	2.43389	-5.40348
B7H15_04455	thermonuclease family protein	562.022	4.31928	-19.9634
B7H15_11355	MutS family DNA mismatch repair protein	328.824	1.59102	-3.01262
B7H15_12310	hypothetical protein	158.811	2.12157	-4.35167
B7H15_14375	DUF4176 domain-containing protein	69.2893	2.24003	-4.72408
B7H15_00835	hypothetical protein	123.761	1.6131	-3.05908
B7H15_11240	site-specific integrase	6.05964	-2.03238	4.09078
B7H15_03390	endonuclease III domain-containing protein	54.585	-2.23073	4.69372
B7H15_06510	type I DNA topoisomerase	3476.64	-2.27763	4.84881
B7H15_07190	Y-family DNA polymerase	378.963	-2.40429	5.29375
B7H15_10990	HNH endonuclease	41.9431	-4.52758	23.0642
B7H15_11065	DnaD domain-containing protein	481.528	-3.99179	15.9092
B7H15_11070	single-stranded DNA-binding protein	273.849	-4.2588	19.1437
B7H15_00420	YdhK family protein	786.433	3.76151	-13.5621
B7H15_00550	tandem-type lipoprotein	33.8795	1.98739	-3.96519
B7H15_00620	staphylococcal protein A	99.0499	2.6768	-6.39435
B7H15_00855	capsular polysaccharide type 5/8 biosynthesis protein CapA	34.6616	1.71942	-3.29303
B7H15_03020	NAD-dependent epimerase/dehydratase family protein	3884.15	3.25958	-9.57705
B7H15_05355	glycosyltransferase	1154.77	5.4365	-43.3062
B7H15_05420	cysteine protease staphopain B	4107.55	4.83619	-28.5653
B7H15_05425	Glu-specific serine endopeptidase SspA	3172.64	6.14975	-71.0003
B7H15_05865	LPXTG-anchored heme-scavenging protein IsdA	289.61	3.09381	-8.53748
B7H15_05870	heme uptake protein IsdC	142.525	3.2567	-9.55794
B7H15_06050	alpha-hemolysin	14554.3	5.93476	-61.1703
B7H15_09435	haptoglobin-binding heme uptake protein HarA	4072.87	2.62804	-6.18185
B7H15_09970	bi-component leukocidin LukED subunit D	42.4119	2.31065	-4.96106
B7H15_10650	cysteine protease staphopain A	552.375	5.65554	-50.4066
B7H15_11180	bi-component leukocidin LukGH subunit G	460.453	4.33309	-20.1553
B7H15_13410	immunoglobulin-binding protein Sbi	1313.27	3.58096	-11.9668
B7H15_01370	CDP-glycerol--glycerophosphate glycerophosphotransferase	728.492	-2.26134	4.79436
B7H15_01500	glycine-glycine endopeptidase LytM	1107.54	-3.88644	14.7889
B7H15_01810	aldehyde reductase	1822.64	-1.62257	3.07923
B7H15_03120	6-phospho-3-hexuloisomerase	4576	-3.3173	9.968
B7H15_03460	CHAP domain-containing protein	105.298	-2.12019	4.34752
B7H15_03720	LysM peptidoglycan-binding domain-containing protein	7544.84	-3.00229	8.01272
B7H15_03925	lipoteichoic acid-specific glycosylation protein CsbB	1749.17	-1.68874	3.22376
B7H15_05450	glucosaminidase domain-containing protein	18721	-2.87987	7.36081
B7H15_07485	undecaprenyldiphospho-muramoylpentapeptide beta-N-acetylglucosaminyltransferase	976.853	-1.90459	3.74403
B7H15_09480	hypothetical protein	6467.02	-2.09539	4.27341
B7H15_10700	pectate lyase	644.837	-1.59645	3.02399
B7H15_10920	phage tail tape measure protein	278.599	-3.2327	9.40027
B7H15_11645	lytic transglycosylase SceD	6241.81	-9.21024	592.321
B7H15_13905	fibronectin-binding protein FnbA	514.252	-2.733	6.64838
B7H15_14290	lytic transglycosylase IsaA	15657.9	-2.09895	4.28397
B7H15_14725	amidase domain-containing protein	3140.57	2.37766	-5.19694
B7H15_02090	alkyl hydroperoxide reductase subunit F	58893.2	2.03849	-4.10814
B7H15_02095	peroxiredoxin	25426	1.89876	-3.72893
B7H15_11330	sulfurtransferase TusA family protein	187.921	1.67321	-3.18923
B7H15_00460	persulfide response sulfurtransferase CstA	59.3123	-2.74724	6.71432
B7H15_02870	ATP-dependent Clp protease ATP-binding subunit	7148.76	-1.94169	3.84155
B7H15_04155	bacillithiol system redox-active protein YtxJ	698.63	-1.94779	3.85782
B7H15_04515	organic hydroperoxide resistance protein	2839.19	-4.63403	24.8302
B7H15_05030	ATP-dependent chaperone ClpB	1951.49	-4.52255	22.9839
B7H15_08660	molecular chaperone DnaJ	1159.6	-1.81468	3.51781
B7H15_08665	molecular chaperone DnaK	5995.8	-2.45615	5.48749
B7H15_08670	nucleotide exchange factor GrpE	1232.87	-2.69431	6.47243
B7H15_10970	Clp protease ClpP	127.548	-3.58814	12.0265
B7H15_11245	chaperonin GroEL	4109.16	-2.21663	4.64806
B7H15_11250	co-chaperone GroES	570.485	-2.32479	5.00992
B7H15_14180	ATP-dependent Clp protease ATP-binding subunit ClpL	3888.65	-2.10164	4.29196
B7H15_00395	ABC transporter permease	80.3186	2.32164	-4.99901
B7H15_00400	ABC transporter permease	71.6347	2.33277	-5.03772
B7H15_00415	copper-translocating P-type ATPase	2851.38	3.48521	-11.1983
B7H15_00640	staphyloferrin B ABC transporter permease subunit SirB	62.6888	2.52661	-5.76216
B7H15_00645	staphyloferrin B ABC transporter substrate-binding protein SirA	254.897	3.28197	-9.7268
B7H15_00795	phosphate/phosphite/phosphonate ABC transporter substrate-binding protein	34.7895	2.16064	-4.47114
B7H15_00965	ABC transporter ATP-binding protein	2825.18	2.43743	-5.41674
B7H15_00970	ABC transporter substrate-binding protein	3373.42	2.62213	-6.1566
B7H15_00975	ABC transporter permease	2511.18	2.62829	-6.18295
B7H15_01105	ABC transporter ATP-binding protein	531.884	2.06717	-4.19064
B7H15_01145	sn-glycerol-3-phosphate ABC transporter ATP-binding protein UgpC	73.0219	2.90436	-7.48686
B7H15_01675	formate/nitrite transporter family protein	673.808	5.0758	-33.7263
B7H15_03540	sodium:proton antiporter	1975.36	1.63695	-3.11008
B7H15_03545	metal ABC transporter substrate-binding protein	9502.16	3.50762	-11.3736
B7H15_03550	metal ABC transporter permease	7699.53	3.48132	-11.1682
B7H15_03555	metal ABC transporter ATP-binding protein	7901.39	3.42069	-10.7085
B7H15_05365	ABC transporter substrate-binding protein	115.435	2.25538	-4.77461
B7H15_05575	energy-coupling factor ABC transporter ATP-binding protein	6795.4	1.59341	-3.01763
B7H15_05710	ABC transporter permease	128.642	1.65837	-3.15661
B7H15_05715	ABC transporter permease	152.68	2.02156	-4.06023
B7H15_05880	heme ABC transporter substrate-binding protein IsdE	115.997	1.76085	-3.38898
B7H15_06105	TDT family transporter	234.707	1.71984	-3.294
B7H15_08780	divalent metal cation transporter	766.546	2.05764	-4.16305
B7H15_11205	iron-hydroxamate ABC transporter substrate-binding protein	42.1732	2.18622	-4.55111
B7H15_11210	TrkH family potassium uptake protein	331.788	2.63589	-6.2156
B7H15_12115	ABC transporter substrate-binding protein	1658.58	1.75381	-3.37248
B7H15_13710	ABC transporter permease	37.182	1.58699	-3.00421
B7H15_14195	ferrous iron transport protein A	14.1837	2.48855	-5.61215
B7H15_14230	heavy metal translocating P-type ATPase	1604.77	3.05501	-8.31095
B7H15_14235	copper chaperone CopZ	250.688	3.15029	-8.87831
B7H15_14985	anion permease	756.044	2.60217	-6.072
B7H15_00465	persulfide dioxygenase-sulfurtransferase CstB	115.375	-2.65149	6.28316
B7H15_00635	staphyloferrin B ABC transporter permease subunit SirC	770.564	-1.88226	3.68652
B7H15_04740	HlyC/CorC family transporter	937.56	-2.15358	4.44932
B7H15_07300	phosphate ABC transporter ATP-binding protein PstB	53.2633	-1.85412	3.61531
B7H15_07305	phosphate ABC transporter permease PstA	42.2278	-1.93494	3.82361
B7H15_07310	phosphate ABC transporter permease subunit PstC	33.1238	-1.92429	3.79549
B7H15_13090	ABC transporter ATP-binding protein	17.9559	-2.14116	4.41115
B7H15_13185	magnesium transporter CorA family protein	1028.8	-1.64885	3.13584
B7H15_00590	Na/Pi cotransporter family protein	2773.56	-3.56204	11.8109
B7H15_00385	class I SAM-dependent methyltransferase	65.6814	2.99629	-7.97945
B7H15_11200	class I SAM-dependent methyltransferase	65.3464	1.72834	-3.31345
B7H15_01000	amino acid adenylation domain-containing protein	16824.2	2.2543	-4.77102
B7H15_04435	MSCRAMM family adhesin clumping factor ClfA	23549.6	-2.53523	5.7967
B7H15_13880	YSIRK signal domain/LPXTG anchor domain surface protein	768.987	4.47445	-22.2303
B7H15_00960	DUF4242 domain-containing protein	2458.75	2.27273	-4.83236
B7H15_00985	DUF2294 domain-containing protein	5412.44	2.07951	-4.22663
B7H15_01180	isoprenylcysteine carboxyl methyltransferase family protein	60.0523	2.14172	-4.41287
B7H15_01535	CHAP domain-containing protein	511.755	6.01345	-64.5994
B7H15_01540	WXG100 family type VII secretion effector EsxA	4040.97	5.81958	-56.4766
B7H15_01550	type VII secretion protein EssA	100.174	4.86374	-29.116
B7H15_01555	type VII secretion protein EsaB	30.5017	3.03337	-8.1872
B7H15_01560	type VII secretion protein EssB	203.07	4.17351	-18.0448
B7H15_01590	DNA/RNA non-specific endonuclease	822.653	1.89912	-3.72987
B7H15_01665	DUF4467 domain-containing protein	248.502	1.71872	-3.29145
B7H15_01670	DUF4064 domain-containing protein	428.111	2.1134	-4.3271
B7H15_01690	5\\'-nucleotidase, lipoprotein e(P4) family	365.168	3.71593	-13.1404
B7H15_02355	GTP-binding protein	365.413	1.62662	-3.08788
B7H15_02915	NYN domain-containing protein	2377.45	2.34151	-5.06832
B7H15_03055	Cof-type HAD-IIB family hydrolase	1689.97	1.7282	-3.31315
B7H15_03060	NAD(P)H-dependent oxidoreductase	1491.59	1.89339	-3.71508
B7H15_03285	DUF443 family protein	124.302	1.60777	-3.0478
B7H15_03290	DUF443 domain-containing protein	113.898	2.0994	-4.28532
B7H15_03940	DoxX family protein	1899.18	4.2238	-18.6849
B7H15_03945	DM13 domain-containing protein	2829.06	3.47377	-11.1099
B7H15_05055	YbhB/YbcL family Raf kinase inhibitor-like protein	21.1153	1.85378	-3.61446
B7H15_05060	MAP domain-containing protein	1779.35	1.97279	-3.92527
B7H15_05415	staphostatin B	1534.21	4.69715	-25.9409
B7H15_05500	DUF5011 domain-containing protein	1048.75	1.7048	-3.25984
B7H15_05580	ECF transporter S component	3082.62	1.74742	-3.35757
B7H15_05890	class B sortase	75.5765	1.63944	-3.11545
B7H15_06020	complement convertase inhibitor Efb	487.557	3.51198	-11.408
B7H15_06025	complement inhibitor SCIN-B	493.611	3.32482	-10.02
B7H15_06120	beta-class phenol-soluble modulin	4216.49	7.87659	-235.011
B7H15_06125	beta-class phenol-soluble modulin	2045.5	6.67959	-102.508
B7H15_07030	GMP reductase	293.199	2.15949	-4.46756
B7H15_07875	Panton-Valentine bi-component leukocidin subunit F	2591.21	4.47539	-22.2447
B7H15_07880	Panton-Valentine bi-component leukocidin subunit S	2379.81	5.71894	-52.6712
B7H15_08200	hypothetical protein	354.283	1.58791	-3.00613
B7H15_08785	5-oxoprolinase subunit PxpA	557.04	1.89725	-3.72501
B7H15_09795	DUF4352 domain-containing protein	3622.49	2.45903	-5.49847
B7H15_10655	staphostatin A	202.932	2.44167	-5.4327
B7H15_10815	extracellular adherence protein Eap/Map	2435.43	4.6491	-25.091
B7H15_10840	complement inhibitor SCIN-A	2434.76	2.53203	-5.78383
B7H15_11185	bi-component leukocidin LukGH subunit H	466.538	5.22938	-37.5145
B7H15_12985	DUF805 domain-containing protein	328.41	1.77867	-3.43109
B7H15_13430	bi-component gamma-hemolysin HlgCB subunit C	251.455	3.81799	-14.1036
B7H15_13680	DUF1307 domain-containing protein	967.963	1.73069	-3.31886
B7H15_13730	D-histidine (S)-2-aminobutanoyltransferase CntL	34.3413	2.16281	-4.47787
B7H15_13990	ABC transporter permease	64.0811	2.34454	-5.07899
B7H15_14130	holin-like murein hydrolase modulator CidA	569.409	2.81064	-7.01598
B7H15_14140	sterile alpha motif-like domain-containing protein	2233.71	3.35425	-10.2266
B7H15_14755	accessory Sec system protein Asp3	235.804	2.83146	-7.11792
B7H15_14760	accessory Sec system protein Asp2	359.37	3.10977	-8.63246
B7H15_14765	accessory Sec system protein Asp1	367.157	3.45409	-10.9593
B7H15_15060	DUF3147 family protein	20.9525	1.76175	-3.39109
B7H15_01010	YagU family protein	979.932	3.97527	-15.7281
B7H15_01060	DUF871 domain-containing protein	2644.54	2.50645	-5.68221
B7H15_01265	PrsW family intramembrane metalloprotease	132.179	2.44056	-5.42851
B7H15_13425	bi-component gamma-hemolysin HlgAB subunit A	360.867	1.65087	-3.14023
B7H15_00470	oxidoreductase	202.779	-2.03205	4.08984
B7H15_00475	FAD-dependent pyridine nucleotide-disulfide oxidoreductase	435.826	-2.79427	6.93682
B7H15_01870	NAD(P)H-dependent oxidoreductase	503.747	-2.54299	5.82794
B7H15_02045	YxeA family protein	5.66273	-2.41367	5.32829
B7H15_02050	PepSY domain-containing protein	6440.27	-3.77876	13.7252
B7H15_02190	superantigen-like protein SSL1	303.364	-2.62934	6.18744
B7H15_03660	membrane protein	1845.19	-2.00652	4.01812
B7H15_03870	DUF1361 domain-containing protein	398.275	-2.15504	4.4538
B7H15_03920	aldo/keto reductase	1258.88	-1.77191	3.41505
B7H15_04205	ComF family protein	41.759	-2.30995	4.95865
B7H15_04305	YvcK family protein	2941.72	-1.86975	3.65469
B7H15_04430	N-acetyltransferase	134.328	-2.69345	6.4686
B7H15_04490	sterile alpha motif-like domain-containing protein	3191.59	-1.86781	3.64979
B7H15_04635	DUF1474 family protein	56.2677	-3.2352	9.41655
B7H15_04640	primase	651.273	-2.62518	6.1696
B7H15_04695	DUF368 domain-containing protein	1055.69	-1.92354	3.79353
B7H15_05005	YisL family protein	326.13	-1.79724	3.47554
B7H15_05360	DoxX family protein	144.744	-1.90235	3.73822
B7H15_05610	hypothetical protein	2043.12	-2.48537	5.59979
B7H15_06130	YjjG family noncanonical pyrimidine nucleotidase	632.143	-1.7099	3.27138
B7H15_08565	tRNA (adenine(22)-N(1))-methyltransferase TrmK	310.314	-1.85339	3.61347
B7H15_08890	CsbD family protein	223.041	-2.54736	5.84564
B7H15_09295	metal-dependent hydrolase	2577.07	-1.88674	3.69799
B7H15_09570	polysaccharide biosynthesis protein	1179.19	-1.9489	3.86079
B7H15_09695	competence protein ComK	210.463	-1.93013	3.8109
B7H15_09925	lantibiotic immunity ABC transporter MutE/EpiE family permease subunit	710.586	-2.84946	7.20729
B7H15_10135	DUF445 domain-containing protein	463.861	-2.94954	7.72504
B7H15_10450	type 1 glutamine amidotransferase	6626.38	-3.16078	8.94311
B7H15_10490	YihY/virulence factor BrkB family protein	3611.53	-1.71851	3.29096
B7H15_10730	YolD-like family protein	127.35	-1.86748	3.64896
B7H15_10875	CHAP domain-containing protein	43.5794	-4.0728	16.828
B7H15_10880	phage holin	15.3193	-2.70121	6.50345
B7H15_10895	DUF2951 domain-containing protein	32.8122	-2.36169	5.13973
B7H15_10910	hypothetical protein	291.791	-1.86516	3.64309
B7H15_10915	phage tail family protein	68.8905	-3.65069	12.5593
B7H15_10935	phage tail protein	29.4679	-2.59928	6.05983
B7H15_10950	head-tail adaptor protein	24.8592	-3.52078	11.4778
B7H15_10965	phage major capsid protein	201.581	-3.82429	14.1653
B7H15_10975	phage portal protein	144.511	-3.35404	10.2251
B7H15_10980	terminase large subunit	171.185	-3.6901	12.9072
B7H15_10995	hypothetical protein	458.541	-3.10744	8.61854
B7H15_11000	DUF1514 family protein	39.1466	-2.89334	7.42991
B7H15_11005	transcriptional activator RinB	164.348	-3.28437	9.74305
B7H15_11015	DUF1381 domain-containing protein	76.0178	-3.35123	10.2052
B7H15_11025	dUTP pyrophosphatase	262.138	-3.47672	11.1326
B7H15_11035	DUF1024 family protein	21.9833	-3.30733	9.89932
B7H15_11045	phi PVL orf 51-like protein	143.851	-4.05071	16.5724
B7H15_11050	hypothetical protein	97.4537	-3.17478	9.03034
B7H15_11055	RusA family crossover junction endodeoxyribonuclease	165.8	-3.72765	13.2475
B7H15_11080	recombinase RecT	962.019	-4.19252	18.2841
B7H15_11095	DUF1108 family protein	259.459	-4.17701	18.0886
B7H15_11105	DUF1270 domain-containing protein	30.3382	-3.4151	10.6671
B7H15_11110	DUF771 domain-containing protein	639.225	-4.8818	29.4827
B7H15_11120	phage antirepressor KilAC domain-containing protein	1591.12	-4.63664	24.8753
B7H15_11130	DUF2829 domain-containing protein	516.142	-4.58742	24.041
B7H15_11670	DUF1146 family protein	450.203	-2.44851	5.45851
B7H15_12150	Asp23/Gls24 family envelope stress response protein	33780.4	-2.01212	4.03373
B7H15_12155	DUF2273 domain-containing protein	7087.02	-2.57088	5.94172
B7H15_12160	alkaline shock response membrane anchor protein AmaP	17324	-2.33272	5.03754
B7H15_12750	CHAP domain-containing protein	1125.94	-2.02368	4.06621
B7H15_12775	CHAP domain-containing protein	5256.04	-4.3206	19.9816
B7H15_12945	CPBP family intramembrane metalloprotease SdpC	1535.43	-1.82185	3.53533
B7H15_13205	pyridoxamine 5\\'-phosphate oxidase family protein	3381.9	-3.29145	9.79095
B7H15_13650	iron export ABC transporter permease subunit FetB	621.796	-1.60194	3.03551
B7H15_13665	Txe/YoeB family addiction module toxin	569.371	-2.11296	4.32578
B7H15_13760	carboxymuconolactone decarboxylase family protein	1249.32	-2.83141	7.11768
B7H15_14020	N-acetyltransferase	313.24	-2.41697	5.34049
B7H15_14025	VOC family protein	840.828	-2.02693	4.07536
B7H15_14145	CHAP domain-containing protein	359.849	-2.43786	5.41837
B7H15_14275	CHAP domain-containing protein	107.152	-3.0352	8.1976
B7H15_14345	amidohydrolase family protein	772.947	-2.30985	4.95833
B7H15_14350	alpha/beta hydrolase	1858.48	-2.1394	4.4058
B7H15_14500	antibiotic biosynthesis monooxygenase	437.407	-2.19283	4.57202
B7H15_14530	MBL fold metallo-hydrolase	258.855	-2.50033	5.65815
B7H15_14800	flavin reductase family protein	535.385	-2.14635	4.42706
B7H15_14950	YceI family protein	2827.47	-3.96842	15.6535
B7H15_14980	bacillithiol transferase BstA	527.196	-2.73204	6.64392
B7H15_14995	DNA-binding protein	176.701	-2.01655	4.04614
B7H15_15010	HdeD family acid-resistance protein	747.521	-2.02019	4.05638
B7H15_02860	UvrB/UvrC motif-containing protein	1158.15	-2.66162	6.32742
B7H15_06095	YfcC family protein	318.118	-2.55964	5.89559
B7H15_07700	zinc metallopeptidase	5789.9	-1.69454	3.23674
B7H15_08020	VRR-NUC domain-containing protein	14.6115	-2.00886	4.02465
B7H15_08105	DNA polymerase	11.5884	-1.60858	3.04951
B7H15_03930	two-component system sensor histidine kinase SaeS	5010.38	2.77001	-6.82113
B7H15_11550	sensor histidine kinase KdpD	384.149	1.93109	-3.81344
B7H15_11295	GHKL domain-containing protein	22585.1	3.28855	-9.77128
B7H15_00360	universal stress protein	2482.98	-2.16902	4.49718
B7H15_10480	low molecular weight phosphotyrosine protein phosphatase	1496.65	-1.64591	3.12944
B7H15_11475	anti-sigma B factor RsbW	1702.21	-1.7664	3.40204
B7H15_11480	anti-sigma factor antagonist	1382.64	-2.17058	4.50206
B7H15_00545	phosphatidylinositol-specific phospholipase C	173	4.53344	-23.158
B7H15_01465	ribose transporter RbsU	343.323	2.85948	-7.25756
B7H15_02105	L-cystine transporter	4641.26	4.30068	-19.7075
B7H15_14770	accessory Sec system protein translocase subunit SecY2	207.715	3.34946	-10.1927
B7H15_12165	BCCT family transporter	3671.89	-3.65017	12.5548
B7H15_00195	DUF1643 domain-containing protein	7.65909	2.74701	-6.71324
B7H15_01545	type VII secretion protein EsaA	826.273	4.91963	-30.266
B7H15_13985	ATP-binding cassette domain-containing protein	45.2556	2.71521	-6.56688
B7H15_01700	FtsX-like permease family protein	1306.08	-2.77602	6.84959
B7H15_01705	ABC transporter ATP-binding protein	1388.4	-2.83908	7.15565
B7H15_09930	lantibiotic protection ABC transporter ATP-binding subunit	1312.75	-3.02167	8.12108
B7H15_13095	ABC transporter permease	20.0285	-2.77583	6.84871
