# Supplementary material for: <em>Staphylococcus aureus </em>Stress Response to Bicarbonate Depletion
Source: Preprints.org preprint supplement (doi:10.20944/preprints202407.2401.v1), 2024-07-30
Supplement: Supplementary file 8 [file Table S7.xlsx]

## Sheet: 4h Mutant - Mutant CO2
4h Mutant - Mutant CO2		cut off
		>10
B7H15_11965	PTS sugar transporter subunit IIA	17.385
B7H15_04515	organic hydroperoxide resistance protein	23.013
B7H15_11085	AAA family ATPase	19.371
B7H15_12775	CHAP domain-containing protein	18.354
B7H15_01500	glycine-glycine endopeptidase LytM	14.141
B7H15_11080	recombinase RecT	16.986
B7H15_05030	ATP-dependent chaperone ClpB	22.031
B7H15_02050	PepSY domain-containing protein	12.237
B7H15_11970	mannitol-1-phosphate 5-dehydrogenase	11.524
B7H15_11120	phage antirepressor KilAC domain-containing protein	22.848
B7H15_12165	BCCT family transporter	11.42
B7H15_14950	polyisoprenoid-binding protein	14.965
B7H15_00590	Na/Pi cotransporter family protein	11.383
		< 0,1
B7H15_05550	phosphoribosylformylglycinamidine cyclo-ligase	0.0831
B7H15_03545	metal ABC transporter substrate-binding protein	0.09137
B7H15_14765	accessory Sec system protein Asp1	0.091
B7H15_14775	serine-rich adhesin	0.0423
B7H15_05555	phosphoribosylglycinamide formyltransferase	0.0887
B7H15_05535	phosphoribosylformylglycinamidine synthase I	0.0729
B7H15_05545	amidophosphoribosyltransferase	0.0827
B7H15_13410	immunoglobulin-binding protein Sbi	0.0848
B7H15_02845	pyridoxal 5\\'-phosphate synthase glutaminase subunit PdxT	0.0863
B7H15_05540	phosphoribosylformylglycinamidine synthase subunit PurL	0.0772
B7H15_01540	WXG100 family type VII secretion effector EsxA	0.0176
B7H15_05420	cysteine protease staphopain B	0.0352
B7H15_02840	pyridoxal 5\\'-phosphate synthase lyase subunit PdxS	0.0833
B7H15_14830	transcriptional regulator IcaR	0.0482
B7H15_07875	Panton-Valentine bi-component leukocidin subunit F	0.0446
B7H15_05560	bifunctional phosphoribosylaminoimidazolecarboxamide formyltransferase/IMP cyclohydrolase	0.093
B7H15_01690	5\\'-nucleotidase, lipoprotein e(P4) family	0.0773
B7H15_10815	extracellular adherence protein Eap/Map	0.0406
B7H15_03555	metal ABC transporter ATP-binding protein	0.0977
B7H15_00135	LPXTG-anchored adenosine synthase AdsA	0.0875
B7H15_00750	cell-wall-anchored protein SasD	0.0369
B7H15_03940	DoxX family protein	0.0549
B7H15_02105	L-cystine transporter	0.0506
B7H15_07880	Panton-Valentine bi-component leukocidin subunit S	0.0191
B7H15_05565	phosphoribosylamine--glycine ligase	0.0961
B7H15_14690	zinc metalloproteinase aureolysin	0.0226
B7H15_13125	L-lactate permease	0.0617
B7H15_01765	YSIRK domain-containing triacylglycerol lipase Lip2/Geh	0.0491
B7H15_03550	metal ABC transporter permease	0.0935
B7H15_01120	peptide ABC transporter substrate-binding protein	0.0673
B7H15_05520	5-(carboxyamino)imidazole ribonucleotide synthase	0.0838
B7H15_14140	sterile alpha motif-like domain-containing protein	0.0991
B7H15_01010	YagU family protein	0.0823
B7H15_03945	DM13 domain-containing protein	0.0929

## Sheet: dmpsABC(A)-dmpsABC(CO2) 4h
ID	Gene	Annotation	baseMean	log2FoldChange	Fold change mut 4h vs mut CO2 4h	lfcSE	stat	pvalue	padj	filter
lcl|CP020619.1_cds_ARG46380.1_1956	B7H15_09930	lantibiotic protection ABC transporter ATP-binding subunit	1318.46	2.90684	7.49975	0.477485	6.08781	1.14463e-09	6.16242e-09	1
lcl|CP020619.1_cds_ARG46721.1_2320	B7H15_11965	PTS sugar transporter subunit IIA	755.705	4.1198	17.3853	0.318413	12.9385	2.72836e-38	1.04878e-36	1
lcl|CP020619.1_cds_ARG45097.1_601	B7H15_03120	6-phospho-3-hexuloisomerase	4479.84	3.26494	9.61269	0.196795	16.5905	8.16018e-62	1.04559e-59	1
lcl|CP020619.1_cds_ARG45733.1_1274	B7H15_06510	type I DNA topoisomerase	3421.83	2.23021	4.69203	0.162179	13.7515	4.9875e-43	2.28237e-41	1
lcl|CP020619.1_cds_ARG45793.1_1336	B7H15_06820	type I glutamate--ammonia ligase	3437.38	1.68906	3.22446	0.291052	5.80327	6.50342e-09	3.18055e-08	1
lcl|CP020619.1_cds_ARG45354.1_878	B7H15_04515	organic hydroperoxide resistance protein	2773.55	4.5244	23.0134	0.385161	11.7468	7.33599e-32	2.10444e-30	1
lcl|CP020619.1_cds_ARG46585.1_2176	B7H15_11220	GNAT family N-acetyltransferase	272.265	1.77979	3.43376	0.260179	6.84062	7.88493e-12	5.49088e-11	1
lcl|CP020619.1_cds_ARG45245.1_761	B7H15_03920	aldo/keto reductase	1257.52	1.70452	3.25921	0.382267	4.45899	8.23471e-06	2.73825e-05	1
lcl|CP020619.1_cds_ARG45863.1_1410	B7H15_07190	Y-family DNA polymerase	372.573	2.35831	5.1277	0.159619	14.7746	2.13614e-49	1.52061e-47	1
lcl|CP020619.1_cds_ARG46562.1_2149	B7H15_11085	AAA family ATPase	1588.88	4.27583	19.371	0.435206	9.82485	8.8002e-23	1.44564e-21	1
lcl|CP020619.1_cds_ARG45289.1_808	B7H15_04155	bacillithiol system redox-active protein YtxJ	691.242	1.89148	3.71015	0.321712	5.87941	4.11738e-09	2.06083e-08	1
lcl|CP020619.1_cds_ARG47348.1_1511	B7H15_07700	zinc metallopeptidase	5737.63	1.65051	3.13945	0.204458	8.07263	6.88003e-16	6.88719e-15	1
lcl|CP020619.1_cds_ARG46186.1_1748	B7H15_08885	hypothetical protein	783.697	1.65237	3.1435	0.656373	2.51743	0.0118215	0.0220592	1
lcl|CP020619.1_cds_ARG46685.1_2284	B7H15_11785	aldehyde dehydrogenase family protein	8582.05	2.7278	6.62446	0.374572	7.28245	3.27801e-13	2.61425e-12	1
lcl|CP020619.1_cds_ARG45339.1_862	B7H15_04435	MSCRAMM family adhesin clumping factor ClfA	23584.7	2.43741	5.41669	0.456111	5.3439	9.09695e-08	3.89406e-07	1
lcl|CP020619.1_cds_ARG46592.1_2184	B7H15_11260	hypothetical protein	1218.95	1.93505	3.82391	0.200813	9.63606	5.63065e-22	8.65769e-21	1
lcl|CP020619.1_cds_ARG46887.1_2500	B7H15_12910	SDR family oxidoreductase	3054.27	2.70294	6.51128	0.28977	9.32789	1.08004e-20	1.50423e-19	1
lcl|CP020619.1_cds_ARG46863.1_2473	B7H15_12775	CHAP domain-containing protein	5123.9	4.19805	18.3544	0.444904	9.43586	3.87808e-21	5.56244e-20	1
lcl|CP020619.1_cds_ARG44807.1_298	B7H15_01500	glycine-glycine endopeptidase LytM	1081.69	3.82186	14.1415	0.270968	14.1045	3.56451e-45	2.01499e-43	1
lcl|CP020619.1_cds_ARG45689.1_1229	B7H15_06285	hypothetical protein	191.197	2.23141	4.69593	0.324952	6.86689	6.5616e-12	4.58596e-11	1
lcl|CP020619.1_cds_ARG44784.1_272	B7H15_01370	CDP-glycerol--glycerophosphate glycerophosphotransferase	717.022	2.21029	4.62769	0.223473	9.89066	4.56994e-23	7.77294e-22	1
lcl|CP020619.1_cds_ARG46663.1_2261	B7H15_11670	DUF1146 family protein	447.851	2.3506	5.10037	0.479108	4.90621	9.28534e-07	3.58362e-06	1
lcl|CP020619.1_cds_ARG46859.1_2469	B7H15_12755	hypothetical protein	1368.39	2.41056	5.31682	0.408613	5.89938	3.64865e-09	1.85521e-08	1
lcl|CP020619.1_cds_ARG45099.1_603	B7H15_03130	MFS transporter	2293.3	1.943	3.84504	0.288435	6.73635	1.62419e-11	1.08017e-10	1
lcl|CP020619.1_cds_ARG47092.1_2722	B7H15_14020	N-acetyltransferase	307.951	2.35858	5.12865	0.308098	7.6553	1.92865e-14	1.69264e-13	1
lcl|CP020619.1_cds_ARG46445.1_2028	B7H15_10480	low molecular weight phosphotyrosine protein phosphatase	1488.16	1.58806	3.00645	0.367565	4.32049	1.55683e-05	4.96224e-05	1
lcl|CP020619.1_cds_ARG47160.1_2796	B7H15_14390	fructosamine kinase family protein	607.836	1.96184	3.89559	0.431057	4.55123	5.33323e-06	1.8331e-05	1
lcl|CP020619.1_cds_ARG45351.1_874	B7H15_04495	hypothetical protein	1285.65	1.85749	3.62376	0.388835	4.77706	1.77876e-06	6.58722e-06	1
lcl|CP020619.1_cds_ARG45317.1_838	B7H15_04305	YvcK family protein	2933.85	1.82107	3.53344	0.21941	8.29988	1.04215e-16	1.13165e-15	1
lcl|CP020619.1_cds_ARG47181.1_2818	B7H15_14500	antibiotic biosynthesis monooxygenase	436.856	2.03912	4.10995	0.574795	3.54757	0.000388807	0.000984568	1
lcl|CP020619.1_cds_ARG46720.1_2319	B7H15_11960	BglG family transcription antiterminator	1185.68	3.23706	9.42869	0.321079	10.0818	6.64998e-24	1.21726e-22	1
lcl|CP020619.1_cds_ARG46561.1_2148	B7H15_11080	recombinase RecT	939.695	4.0863	16.9863	0.425427	9.60515	7.60438e-22	1.15084e-20	1
lcl|CP020619.1_cds_ARG47142.1_2776	B7H15_14290	lytic transglycosylase IsaA	15495.9	2.04418	4.12439	0.24355	8.39326	4.72837e-17	5.31458e-16	1
lcl|CP020619.1_cds_ARG46746.1_2348	B7H15_12150	Asp23/Gls24 family envelope stress response protein	33895.2	1.95179	3.86854	0.341774	5.71076	1.12475e-08	5.29847e-08	1
lcl|CP020619.1_cds_ARG45561.1_1095	B7H15_05610	hypothetical protein	2043.55	2.2639	4.80289	0.635732	3.5611	0.000369311	0.000938913	1
lcl|CP020619.1_cds_ARG45452.1_981	B7H15_05030	ATP-dependent chaperone ClpB	1909.13	4.46618	22.1031	0.199247	22.4153	2.79199e-111	1.78873e-108	1
lcl|CP020619.1_cds_ARG46315.1_1883	B7H15_09565	rRNA pseudouridine synthase	1024.34	1.95936	3.8889	0.105825	18.5151	1.56088e-76	4.28574e-74	1
lcl|CP020619.1_cds_ARG46708.1_2307	B7H15_11900	SDR family oxidoreductase	1648.76	2.25774	4.78242	0.44378	5.08752	3.62774e-07	1.45564e-06	1
lcl|CP020619.1_cds_ARG46126.1_1684	B7H15_08565	tRNA (adenine(22)-N(1))-methyltransferase TrmK	306.516	1.80374	3.49125	0.211694	8.52053	1.58825e-17	1.80629e-16	1
lcl|CP020619.1_cds_ARG46379.1_1955	B7H15_09925	lantibiotic immunity ABC transporter MutE/EpiE family permease subunit	713.912	2.74855	6.72043	0.430855	6.3793	1.77898e-10	1.05206e-09	1
lcl|CP020619.1_cds_ARG46590.1_2182	B7H15_11250	co-chaperone GroES	561.567	2.25483	4.77278	0.367273	6.13938	8.28466e-10	4.5108e-09	1
lcl|CP020619.1_cds_ARG45096.1_600	B7H15_03115	3-hexulose-6-phosphate synthase	4479.8	3.21415	9.28015	0.223371	14.3893	6.04033e-47	3.86984e-45	1
lcl|CP020619.1_cds_ARG45687.1_1227	B7H15_06275	orotidine-5\\'-phosphate decarboxylase	413.27	2.5565	5.88279	0.406718	6.28568	3.26424e-10	1.86168e-09	1
lcl|CP020619.1_cds_ARG44846.1_338	B7H15_01700	FtsX-like permease family protein	1299.35	2.69333	6.46803	0.404229	6.66287	2.68522e-11	1.73771e-10	1
lcl|CP020619.1_cds_ARG47049.1_2670	B7H15_13760	carboxymuconolactone decarboxylase family protein	1253.2	2.74828	6.71914	0.403582	6.80972	9.77909e-12	6.71265e-11	1
lcl|CP020619.1_cds_ARG47240.1_2878	B7H15_14800	NADH-FMN oxidoreductase RutF, flavin reductase	528.347	2.06231	4.17656	0.457638	4.50643	6.59273e-06	2.22302e-05	1
lcl|CP020619.1_cds_ARG46768.1_2372	B7H15_12270	MAP domain-containing protein	4806.22	2.31378	4.97185	0.305921	7.56334	3.92854e-14	3.35585e-13	1
lcl|CP020619.1_cds_ARG45920.1_1469	B7H15_07485	undecaprenyldiphospho-muramoylpentapeptide beta-N-acetylglucosaminyltransferase	963.132	1.85858	3.6265	0.159311	11.6663	1.89451e-31	5.27718e-30	1
lcl|CP020619.1_cds_ARG46316.1_1884	B7H15_09570	polysaccharide biosynthesis protein	1168.4	1.90323	3.74051	0.179375	10.6104	2.66665e-26	5.69478e-25	1
lcl|CP020619.1_cds_ARG45382.1_907	B7H15_04660	phage capsid protein	471.154	2.14868	4.43421	0.194599	11.0415	2.40847e-28	5.78635e-27	1
lcl|CP020619.1_cds_ARG45238.1_754	B7H15_03885	hypothetical protein	778.439	2.22116	4.66269	0.307316	7.22762	4.91527e-13	3.88772e-12	1
lcl|CP020619.1_cds_ARG47030.1_2651	B7H15_13665	Txe/YoeB family addiction module toxin	560.43	2.054	4.15255	0.317093	6.47759	9.32e-11	5.75982e-10	1
lcl|CP020619.1_cds_1881	B7H15_09555		2416.05	2.13278	4.38562	0.318074	6.70531	2.00981e-11	1.3229e-10	1
lcl|CP020619.1_cds_ARG47386.1_2594	B7H15_13380	multidrug efflux MFS transporter MdeA	746.061	1.96052	3.89203	0.158068	12.403	2.51661e-35	8.19816e-34	1
lcl|CP020619.1_cds_ARG44602.1_70	B7H15_00360	WP_000475805.1	2499.74	2.00887	4.02466	0.591675	3.39522	0.00068573	0.00164541	1
lcl|CP020619.1_cds_ARG45246.1_762	B7H15_03925	lipoteichoic acid-specific glycosylation protein CsbB	1747.26	1.63558	3.10713	0.271315	6.02836	1.6563e-09	8.74564e-09	1
lcl|CP020619.1_cds_ARG46894.1_2507	B7H15_12945	CPBP family intramembrane metalloprotease SdpC	1532.19	1.77522	3.4229	0.229686	7.72889	1.08492e-14	9.74396e-14	1
lcl|CP020619.1_cds_ARG46747.1_2349	B7H15_12155	DUF2273 domain-containing protein	7111.8	2.49276	5.62854	0.37554	6.63781	3.18385e-11	2.04661e-10	1
lcl|CP020619.1_cds_ARG47016.1_2635	B7H15_13585	MFS transporter	1140.19	1.63928	3.1151	0.135111	12.1328	7.07657e-34	2.19374e-32	1
lcl|CP020619.1_cds_ARG47279.1_2920	B7H15_15010	Uncharacterized membrane protein HdeD	749.951	1.84316	3.58795	0.629924	2.926	0.0034335	0.00711887	1
lcl|CP020619.1_cds_ARG44912.1_408	B7H15_02050	PepSY domain-containing protein	6379.88	3.6133	12.238	0.542558	6.65974	2.74304e-11	1.76917e-10	1
lcl|CP020619.1_cds_ARG45049.1_551	B7H15_02870	ATP-dependent Clp protease ATP-binding subunit	7062.02	1.89094	3.70877	0.220727	8.56689	1.06321e-17	1.22364e-16	1
lcl|CP020619.1_cds_ARG45350.1_873	B7H15_04490	sterile alpha motif-like domain-containing protein	3194.66	1.79918	3.48022	0.410564	4.38221	1.17479e-05	3.82057e-05	1
lcl|CP020619.1_cds_ARG47072.1_2699	B7H15_13905	fibronectin-binding protein FnbA	510.915	2.68168	6.41605	0.212581	12.6149	1.74853e-36	6.34091e-35	1
lcl|CP020619.1_cds_ARG45921.1_1470	B7H15_07490	GNAT family N-acetyltransferase	325.577	1.74028	3.34101	0.356553	4.88085	1.05629e-06	4.05229e-06	1
lcl|CP020619.1_cds_ARG45048.1_550	B7H15_02865	protein arginine kinase	2060.17	2.4515	5.46983	0.229543	10.6799	1.26441e-26	2.73056e-25	1
lcl|CP020619.1_cds_ARG46624.1_2221	B7H15_11470	RNA polymerase sigma factor SigB	3613.27	1.66332	3.16745	0.276675	6.01183	1.8344e-09	9.65948e-09	1
lcl|CP020619.1_cds_ARG46527.1_2114	B7H15_10910	hypothetical protein	288.362	1.80406	3.49201	0.373574	4.82919	1.37091e-06	5.15636e-06	1
lcl|CP020619.1_cds_ARG44878.1_371	B7H15_01865	LLM class flavin-dependent oxidoreductase	1309.39	2.90556	7.49309	0.182151	15.9514	2.78474e-57	2.67614e-55	1
lcl|CP020619.1_cds_ARG46144.1_1704	B7H15_08665	molecular chaperone DnaK	5919.6	2.40431	5.29382	0.215842	11.1392	8.08517e-29	1.99227e-27	1
lcl|CP020619.1_cds_ARG47318.1_549	B7H15_02860	UvrB/UvrC motif-containing protein	1139.39	2.60706	6.0926	0.236155	11.0396	2.46123e-28	5.8401e-27	1
lcl|CP020619.1_cds_ARG45784.1_1327	B7H15_06775	glycerol kinase GlpK	421.679	2.07488	4.21311	0.31511	6.58463	4.5603e-11	2.86434e-10	1
lcl|CP020619.1_cds_ARG46722.1_2321	B7H15_11970	mannitol-1-phosphate 5-dehydrogenase	1316.57	3.52661	11.5243	0.253024	13.9378	3.73071e-44	1.83857e-42	1
lcl|CP020619.1_cds_ARG46263.1_1829	B7H15_09295	metal-dependent hydrolase	2561.13	1.83666	3.57183	0.255095	7.19992	6.02479e-13	4.66921e-12	1
lcl|CP020619.1_cds_ARG44604.1_73	B7H15_00375	alpha/beta hydrolase	1623.03	2.07057	4.20051	0.377988	5.47787	4.30483e-08	1.9197e-07	1
lcl|CP020619.1_cds_ARG45387.1_914	B7H15_04695	DUF368 domain-containing protein	1053.95	1.85667	3.62171	0.384108	4.83372	1.34005e-06	5.06006e-06	1
lcl|CP020619.1_cds_ARG45194.1_709	B7H15_03660	membrane protein	1828.42	1.96176	3.89538	0.186301	10.5301	6.27676e-26	1.3113e-24	1
lcl|CP020619.1_cds_ARG47115.1_2747	B7H15_14145	CHAP domain-containing protein	357.084	2.37559	5.1895	0.332691	7.14054	9.29661e-13	7.09051e-12	1
lcl|CP020619.1_cds_ARG45919.1_1468	B7H15_07480	phosphatase PAP2 family protein	905.274	1.75425	3.37352	0.120537	14.5536	5.53801e-48	3.80145e-46	1
lcl|CP020619.1_cds_ARG45237.1_753	B7H15_03880	multidrug efflux MFS transporter NorA	447.921	2.36761	5.16084	0.143599	16.4876	4.50416e-61	5.41062e-59	1
lcl|CP020619.1_cds_ARG45685.1_1225	B7H15_06265	carbamoyl phosphate synthase small subunit	532.804	2.68886	6.44806	0.431492	6.23155	4.61841e-10	2.58792e-09	1
lcl|CP020619.1_cds_ARG45661.1_1198	B7H15_06130	YjjG family noncanonical pyrimidine nucleotidase	627.905	1.66732	3.17623	0.118938	14.0184	1.20354e-44	6.08739e-43	1
lcl|CP020619.1_cds_ARG46569.1_2156	B7H15_11120	phage antirepressor KilAC domain-containing protein	1553.35	4.51401	22.8482	0.453496	9.9538	2.42743e-23	4.29481e-22	1
lcl|CP020619.1_cds_ARG47153.1_2788	B7H15_14350	alpha/beta hydrolase	1854.1	2.08628	4.24652	0.265075	7.87054	3.531e-15	3.31053e-14	1
lcl|CP020619.1_cds_ARG44623.1_93	B7H15_00475	FAD-dependent pyridine nucleotide-disulfide oxidoreductase	430.823	2.732	6.64378	0.289263	9.44472	3.56369e-21	5.18895e-20	1
lcl|CP020619.1_cds_ARG45688.1_1228	B7H15_06280	orotate phosphoribosyltransferase	314.726	2.80875	7.00677	0.389192	7.21687	5.3197e-13	4.15629e-12	1
lcl|CP020619.1_cds_ARG44847.1_339	B7H15_01705	ABC transporter ATP-binding protein	1372.5	2.77521	6.84576	0.322584	8.60306	7.7621e-18	9.04167e-17	1
lcl|CP020619.1_cds_ARG46942.1_2559	B7H15_13205	pyridoxamine 5\\'-phosphate oxidase family protein	3336.32	3.1892	9.12106	0.433941	7.34939	1.99115e-13	1.61476e-12	1
lcl|CP020619.1_cds_ARG45110.1_614	B7H15_03185	APC family permease	3440.31	2.46959	5.53886	0.342548	7.20948	5.61672e-13	4.37058e-12	1
lcl|CP020619.1_cds_ARG47080.1_2707	B7H15_13945	DUF2188 domain-containing protein	1746.15	2.49605	5.64137	0.560436	4.45376	8.43809e-06	2.79621e-05	1
lcl|CP020619.1_cds_ARG45270.1_786	B7H15_04045	diacylglycerol kinase family lipid kinase	2313.41	2.89378	7.43215	0.466211	6.20702	5.40001e-10	2.99102e-09	1
lcl|CP020619.1_cds_ARG46409.1_1989	B7H15_10135	DUF445 domain-containing protein	458.607	2.89257	7.42593	0.242798	11.9135	1.00665e-32	2.9315e-31	1
lcl|CP020619.1_cds_ARG46529.1_2116	B7H15_10920	phage tail tape measure protein	274.702	3.1338	8.77747	0.441309	7.10116	1.2371e-12	9.32432e-12	1
lcl|CP020619.1_cds_ARG47340.1_1192	B7H15_06095	YfcC family protein	316.182	2.49359	5.63176	0.329204	7.57458	3.60283e-14	3.09136e-13	1
lcl|CP020619.1_cds_ARG46440.1_2022	B7H15_10450	type 1 glutamine amidotransferase	6534.28	3.08559	8.489	0.326745	9.44345	3.60714e-21	5.21273e-20	1
lcl|CP020619.1_cds_ARG45378.1_903	B7H15_04640	primase	642.358	2.57094	5.94196	0.258296	9.95346	2.43567e-23	4.29481e-22	1
lcl|CP020619.1_cds_ARG45318.1_839	B7H15_04310	DNA-binding protein WhiA	3089.1	1.82187	3.5354	0.181626	10.0309	1.11492e-23	2.00269e-22	1
lcl|CP020619.1_cds_ARG44940.1_436	B7H15_02190	superantigen-like protein SSL1	302.232	2.55243	5.86621	0.370288	6.89309	5.45934e-12	3.88624e-11	1
lcl|CP020619.1_cds_ARG46748.1_2350	B7H15_12160	alkaline shock response membrane anchor protein AmaP	17403.1	2.25406	4.77025	0.396511	5.68475	1.31003e-08	6.11136e-08	1
lcl|CP020619.1_cds_ARG46625.1_2222	B7H15_11475	anti-sigma B factor RsbW	1694.61	1.70347	3.25683	0.364512	4.67329	2.96413e-06	1.07088e-05	1
lcl|CP020619.1_cds_ARG46581.1_2170	B7H15_11190	ArgE/DapE family deacylase	2058.98	2.61302	6.11781	0.272621	9.58478	9.26576e-22	1.39131e-20	1
lcl|CP020619.1_cds_ARG46378.1_1954	B7H15_09920	hypothetical protein	685.875	2.69821	6.48998	0.454632	5.93494	2.93952e-09	1.5066e-08	1
lcl|CP020619.1_cds_ARG46589.1_2181	B7H15_11245	chaperonin GroEL	4049.93	2.15675	4.45909	0.285663	7.54997	4.35345e-14	3.68605e-13	1
lcl|CP020619.1_cds_ARG45396.1_923	B7H15_04740	HlyC/CorC family transporter	931.853	2.08766	4.25059	0.354502	5.889	3.88532e-09	1.94976e-08	1
lcl|CP020619.1_cds_ARG45686.1_1226	B7H15_06270	carbamoyl-phosphate synthase large subunit	1789.71	2.50378	5.67168	0.428212	5.84705	5.00358e-09	2.47858e-08	1
lcl|CP020619.1_cds_ARG46938.1_2555	B7H15_13185	magnesium transporter CorA family protein	1017.93	1.60509	3.04214	0.145921	10.9997	3.83279e-28	8.87545e-27	1
lcl|CP020619.1_cds_ARG46187.1_1749	B7H15_08890	CsbD family protein	222.725	2.39146	5.24688	0.562578	4.25089	2.12921e-05	6.65256e-05	1
lcl|CP020619.1_cds_ARG44648.1_125	B7H15_00635	staphyloferrin B ABC transporter permease subunit SirC	771.15	1.83011	3.55564	0.274065	6.67765	2.42808e-11	1.58196e-10	1
lcl|CP020619.1_cds_ARG47122.1_2754	B7H15_14180	ATP-dependent Clp protease ATP-binding subunit ClpL	3859.33	1.86115	3.63297	0.712409	2.61247	0.00898902	0.0173233	1
lcl|CP020619.1_cds_ARG45147.1_662	B7H15_03425	alpha/beta hydrolase	1222.78	2.95958	7.779	0.417598	7.08716	1.36888e-12	1.02773e-11	1
lcl|CP020619.1_cds_ARG46339.1_1909	B7H15_09695	competence protein ComK	208.805	1.87328	3.66365	0.289455	6.47174	9.68792e-11	5.96801e-10	1
lcl|CP020619.1_cds_ARG45792.1_1335	B7H15_06815	MerR family transcriptional regulator	639.551	1.7287	3.31428	0.395034	4.37607	1.20836e-05	3.92308e-05	1
lcl|CP020619.1_cds_ARG47152.1_2787	B7H15_14345	amidohydrolase family protein	766.853	2.25804	4.7834	0.234074	9.64668	5.0772e-22	7.86965e-21	1
lcl|CP020619.1_cds_ARG46299.1_1866	B7H15_09480	hypothetical protein	6455.85	2.03841	4.10793	0.300335	6.78712	1.14394e-11	7.79666e-11	1
lcl|CP020619.1_cds_ARG45684.1_1224	B7H15_06260	dihydroorotase	647.321	2.50373	5.67149	0.425142	5.88915	3.88184e-09	1.94976e-08	1
lcl|CP020619.1_cds_ARG45683.1_1223	B7H15_06255	aspartate carbamoyltransferase catalytic subunit	419.188	2.36239	5.14221	0.408193	5.78743	7.14723e-09	3.47772e-08	1
lcl|CP020619.1_cds_ARG45206.1_721	B7H15_03720	LysM peptidoglycan-binding domain-containing protein	7446.74	2.953	7.74359	0.155948	18.9358	5.7824e-80	1.8523e-77	1
lcl|CP020619.1_cds_ARG46143.1_1703	B7H15_08660	molecular chaperone DnaJ	1145.18	1.77206	3.41541	0.128622	13.7772	3.49464e-43	1.63822e-41	1
lcl|CP020619.1_cds_ARG46749.1_2351	B7H15_12165	BCCT family transporter	3639.84	3.51351	11.4202	0.501719	7.00295	2.5062e-12	1.84556e-11	1
lcl|CP020619.1_cds_ARG47267.1_2908	B7H15_14950	polyisoprenoid-binding protein	2762.39	3.9036	14.9658	0.242764	16.0798	3.53576e-58	3.5767e-56	1
lcl|CP020619.1_cds_ARG47046.1_2667	B7H15_13745	short-chain dehydrogenase	1101.82	2.98361	7.90965	0.3803	7.84542	4.31517e-15	3.98738e-14	1
lcl|CP020619.1_cds_ARG45447.1_976	B7H15_05005	YisL family protein	324.378	1.72929	3.31565	0.408246	4.2359	2.27637e-05	7.09106e-05	1
lcl|CP020619.1_cds_ARG44741.1_225	B7H15_01135	FMN-dependent NADH-azoreductase	992.924	2.75006	6.72744	0.229556	11.9799	4.52931e-33	1.36021e-31	1
lcl|CP020619.1_cds_ARG46314.1_1882	B7H15_09560	YtxH domain-containing protein	3268	2.00038	4.00105	0.38237	5.23153	1.68115e-07	6.93383e-07	1
lcl|CP020619.1_cds_ARG45682.1_1222	B7H15_06250	uracil permease	335.312	2.16064	4.47114	0.477411	4.52575	6.0182e-06	2.05088e-05	1
lcl|CP020619.1_cds_ARG46313.1_1880	B7H15_09550	hypothetical protein	444.112	1.64721	3.13228	0.310295	5.30854	1.10506e-07	4.69895e-07	1
lcl|CP020619.1_cds_ARG46145.1_1705	B7H15_08670	nucleotide exchange factor GrpE	1216.17	2.64024	6.23433	0.239564	11.021	3.02703e-28	7.09507e-27	1
lcl|CP020619.1_cds_ARG45532.1_1063	B7H15_05450	glucosaminidase domain-containing protein	18693.7	2.82733	7.09761	0.19866	14.232	5.79913e-46	3.37756e-44	1
lcl|CP020619.1_cds_ARG44879.1_372	B7H15_01870	NAD(P)H-dependent oxidoreductase	495.422	2.49545	5.63904	0.179733	13.8842	7.89395e-44	3.79305e-42	1
lcl|CP020619.1_cds_ARG46858.1_2468	B7H15_12750	CHAP domain-containing protein	1126.81	1.94483	3.84993	0.455065	4.27374	1.92222e-05	6.04665e-05	1
lcl|CP020619.1_cds_ARG45047.1_548	B7H15_02855	CtsR family transcriptional regulator	805.159	2.48957	5.61609	0.190126	13.0943	3.54913e-39	1.42113e-37	1
lcl|CP020619.1_cds_ARG46772.1_2376	B7H15_12290	hypothetical protein	124.046	1.63186	3.09913	0.300845	5.42427	5.81922e-08	2.55355e-07	1
lcl|CP020619.1_cds_ARG46893.1_2506	B7H15_12940	formimidoylglutamase	1690.74	1.82682	3.54753	0.43585	4.19139	2.77249e-05	8.55335e-05	1
lcl|CP020619.1_cds_ARG46238.1_1802	B7H15_09160	amino acid permease	1208.24	1.97935	3.94314	0.425846	4.64803	3.35118e-06	1.19944e-05	1
lcl|CP020619.1_cds_ARG44622.1_92	B7H15_00470	oxidoreductase	201.646	1.95375	3.8738	0.439691	4.44346	8.85244e-06	2.92847e-05	1
lcl|CP020619.1_cds_ARG47302.1_116	B7H15_00590	Na/Pi cotransporter family protein	2719.74	3.50885	11.3834	0.196936	17.8173	5.19205e-71	9.97912e-69	1
lcl|CP020619.1_cds_ARG46146.1_1706	B7H15_08675	heat-inducible transcriptional repressor HrcA	1704.73	3.09224	8.52817	0.247168	12.5107	6.52731e-36	2.24027e-34	1
lcl|CP020619.1_cds_ARG45234.1_750	B7H15_03865	hypothetical protein	280.069	1.69454	3.23673	0.204369	8.29155	1.11778e-16	1.20021e-15	1
lcl|CP020619.1_cds_ARG45235.1_751	B7H15_03870	DUF1361 domain-containing protein	393.069	2.0882	4.25219	0.331926	6.29118	3.15054e-10	1.80218e-09	1
lcl|CP020619.1_cds_ARG46447.1_2030	B7H15_10490	YihY/virulence factor BrkB family protein	3621.1	1.65411	3.1473	0.379577	4.35779	1.31385e-05	4.24407e-05	1
lcl|CP020619.1_cds_ARG44877.1_370	B7H15_01860	VOC family protein	693.483	2.70073	6.5013	0.160077	16.8714	7.3053e-64	1.00291e-61	1
lcl|CP020619.1_cds_ARG45734.1_1275	B7H15_06515	methylenetetrahydrofolate--tRNA-(uracil(54)-C(5))-methyltransferase (FADH(2)-oxidizing) TrmFO	2634.64	1.91825	3.77964	0.17749	10.8076	3.16808e-27	6.99891e-26	1
lcl|CP020619.1_cds_ARG46626.1_2223	B7H15_11480	anti-sigma factor antagonist	1374.41	2.09414	4.2697	0.409601	5.11262	3.17719e-07	1.28289e-06	1
lcl|CP020619.1_cds_ARG47273.1_2914	B7H15_14980	damage-inducible protein DinB	521.475	2.63503	6.21189	0.470367	5.60207	2.11806e-08	9.71576e-08	1
lcl|CP020619.1_cds_ARG47093.1_2723	B7H15_14025	VOC family protein	827.668	1.98501	3.95865	0.109537	18.1218	2.14629e-73	4.58352e-71	1
lcl|CP020619.1_cds_ARG45550.1_1083	B7H15_05550	phosphoribosylformylglycinamidine cyclo-ligase	1960.96	-3.58783	0.0831681	0.406001	-8.83699	9.83306e-19	1.2193e-17	-1
lcl|CP020619.1_cds_ARG46902.1_2515	B7H15_12985	DUF805 domain-containing protein	329.596	-1.81167	0.284861	0.179511	-10.0922	5.97949e-24	1.10505e-22	-1
lcl|CP020619.1_cds_ARG44647.1_124	B7H15_00630	HTH-type transcriptional regulator SarS	323.005	-1.92711	0.262956	0.216235	-8.9121	5.00768e-19	6.29069e-18	-1
lcl|CP020619.1_cds_ARG45862.1_1409	B7H15_07185	4-oxalocrotonate tautomerase	311.836	-1.58743	0.332764	0.354522	-4.47765	7.54684e-06	2.51387e-05	-1
lcl|CP020619.1_cds_ARG44541.1_1	B7H15_00005	chromosomal replication initiator protein DnaA	1983.27	-2.54001	0.171942	0.131212	-19.358	1.74482e-83	6.70708e-81	-1
lcl|CP020619.1_cds_ARG45170.1_685	B7H15_03540	sodium:proton antiporter	1984.96	-1.67213	0.31379	0.18217	-9.17896	4.35264e-20	5.80957e-19	-1
lcl|CP020619.1_cds_ARG45171.1_686	B7H15_03545	metal ABC transporter substrate-binding protein	9567.98	-3.4521	0.0913722	0.465839	-7.4105	1.25828e-13	1.03795e-12	-1
lcl|CP020619.1_cds_ARG46062.1_1620	B7H15_08245	site-specific tyrosine recombinase XerD	1115.87	-2.03514	0.243985	0.193303	-10.5282	6.40308e-26	1.3233e-24	-1
lcl|CP020619.1_cds_ARG44549.1_9	B7H15_00045	hypothetical protein	646.361	-1.69532	0.308786	0.417238	-4.06319	4.84058e-05	0.000143796	-1
lcl|CP020619.1_cds_ARG45056.1_559	B7H15_02910	23S rRNA (guanosine(2251)-2\\'-O)-methyltransferase RlmB	2435.6	-2.05526	0.240606	0.231876	-8.86359	7.74765e-19	9.66947e-18	-1
lcl|CP020619.1_cds_ARG46166.1_1727	B7H15_08780	divalent metal cation transporter	772.215	-2.08544	0.235624	0.238654	-8.73836	2.36515e-18	2.8771e-17	-1
lcl|CP020619.1_cds_ARG46167.1_1728	B7H15_08785	5-oxoprolinase subunit PxpA	561.028	-1.92443	0.263444	0.257604	-7.47049	7.98994e-14	6.67681e-13	-1
lcl|CP020619.1_cds_ARG47233.1_2871	B7H15_14765	accessory Sec system protein Asp1	370.053	-3.45707	0.0910581	0.328239	-10.5322	6.14117e-26	1.29707e-24	-1
lcl|CP020619.1_cds_ARG46297.1_1864	B7H15_09470	bifunctional 3-deoxy-7-phosphoheptulonate synthase/chorismate mutase	1269.93	-1.77981	0.291222	0.280949	-6.33499	2.37361e-10	1.38245e-09	-1
lcl|CP020619.1_cds_ARG47235.1_2873	B7H15_14775	serine-rich adhesin	10747.2	-4.55993	0.042396	0.246664	-18.4864	2.65815e-76	6.38621e-74	-1
lcl|CP020619.1_cds_ARG47377.1_2379	B7H15_12305	hypothetical protein	747.26	-2.02079	0.246423	0.167316	-12.0777	1.38558e-33	4.22711e-32	-1
lcl|CP020619.1_cds_ARG47225.1_2863	B7H15_14725	N-acetylmuramoyl-L-alanine amidase	3165.01	-2.41076	0.188057	0.171419	-14.0635	6.36204e-45	3.30482e-43	-1
lcl|CP020619.1_cds_ARG44820.1_311	B7H15_01565	type VII secretion protein EssC	992.92	-3.29867	0.101625	0.266451	-12.38	3.35197e-35	1.07375e-33	-1
lcl|CP020619.1_cds_ARG47261.1_2902	B7H15_14920	polysaccharide deacetylase	208.903	-1.82622	0.282002	0.336718	-5.42361	5.84077e-08	2.55717e-07	-1
lcl|CP020619.1_cds_ARG46608.1_2203	B7H15_11355	MutS family DNA mismatch repair protein	330.704	-1.62243	0.324787	0.242454	-6.69171	2.20576e-11	1.442e-10	-1
lcl|CP020619.1_cds_ARG46740.1_2341	B7H15_12115	ABC transporter substrate-binding protein	1662.2	-1.61487	0.326494	0.703573	-2.29524	0.0217192	0.0380185	-1
lcl|CP020619.1_cds_ARG45053.1_556	B7H15_02895	serine O-acetyltransferase	1273.66	-2.34698	0.196557	0.207875	-11.2903	1.46452e-29	3.7037e-28	-1
lcl|CP020619.1_cds_ARG46171.1_1732	B7H15_08805	5-oxoprolinase subunit PxpB	337.32	-1.9414	0.260363	0.312772	-6.20708	5.39784e-10	2.99102e-09	-1
lcl|CP020619.1_cds_ARG45344.1_867	B7H15_04460	cold-shock protein	3569.48	-3.3207	0.100085	0.615093	-5.3987	6.71251e-08	2.91229e-07	-1
lcl|CP020619.1_cds_ARG44773.1_260	B7H15_01310	nucleoside hydrolase	206.93	-2.11976	0.230085	0.206574	-10.2615	1.05051e-24	2.03948e-23	-1
lcl|CP020619.1_cds_ARG46946.1_2563	B7H15_13225	MarR family transcriptional regulator	1680.11	-1.61061	0.327461	0.248408	-6.4837	8.94998e-11	5.54899e-10	-1
lcl|CP020619.1_cds_ARG45085.1_589	B7H15_03060	NAD(P)H-dependent oxidoreductase	1489.41	-1.90196	0.26758	0.410633	-4.63177	3.62561e-06	1.28806e-05	-1
lcl|CP020619.1_cds_ARG45551.1_1084	B7H15_05555	phosphoribosylglycinamide formyltransferase	1169.34	-3.49463	0.0887179	0.407446	-8.57691	9.74531e-18	1.12834e-16	-1
lcl|CP020619.1_cds_ARG45547.1_1080	B7H15_05535	phosphoribosylformylglycinamidine synthase I	1412.98	-3.77626	0.0729848	0.437914	-8.62329	6.5055e-18	7.62413e-17	-1
lcl|CP020619.1_cds_ARG45549.1_1082	B7H15_05545	amidophosphoribosyltransferase	2672.81	-3.59463	0.082777	0.433469	-8.2927	1.10706e-16	1.19537e-15	-1
lcl|CP020619.1_cds_ARG44722.1_205	B7H15_01035	branched-chain amino acid transport system II carrier protein	685.798	-2.16136	0.223546	0.263665	-8.19735	2.45735e-16	2.53926e-15	-1
lcl|CP020619.1_cds_ARG44739.1_223	B7H15_01125	gamma-glutamyltransferase	544.98	-3.31118	0.100748	0.353352	-9.37075	7.20208e-21	1.02536e-19	-1
lcl|CP020619.1_cds_ARG46982.1_2600	B7H15_13410	immunoglobulin-binding protein Sbi	1336.5	-3.55931	0.0848281	0.411059	-8.65888	4.76426e-18	5.61773e-17	-1
lcl|CP020619.1_cds_ARG45046.1_547	B7H15_02850	NupC/NupG family nucleoside CNT transporter	841.084	-1.91452	0.26526	0.123633	-15.4855	4.34595e-54	3.79678e-52	-1
lcl|CP020619.1_cds_2694	B7H15_13880	#N/A	771.195	-4.50046	0.04418	0.174385	-25.8077	7.27103e-147	6.98746e-144	-1
lcl|CP020619.1_cds_ARG45657.1_1194	B7H15_06105	TDT family transporter	237.419	-1.75656	0.295954	0.16082	-10.9225	8.99548e-28	2.01039e-26	-1
lcl|CP020619.1_cds_ARG44550.1_10	B7H15_00050	serine--tRNA ligase	824.338	-2.05615	0.240457	0.209526	-9.81331	9.86728e-23	1.6072e-21	-1
lcl|CP020619.1_cds_ARG45582.1_1116	B7H15_05715	ABC transporter permease	154.876	-2.03518	0.243977	0.376004	-5.41267	6.20922e-08	2.70003e-07	-1
lcl|CP020619.1_cds_ARG46054.1_1612	B7H15_08205	hypothetical protein	383.896	-1.58572	0.333159	0.175545	-9.03312	1.66849e-19	2.15224e-18	-1
lcl|CP020619.1_cds_ARG46072.1_1630	B7H15_08295	alpha-glucosidase	730.236	-1.79682	0.287809	0.680158	-2.64176	0.00824755	0.0160281	-1
lcl|CP020619.1_cds_ARG45077.1_581	B7H15_03020	NAD-dependent epimerase/dehydratase family protein	3892.65	-3.22735	0.106775	0.425075	-7.59244	3.13939e-14	2.70579e-13	-1
lcl|CP020619.1_cds_ARG47306.1_198	B7H15_01000	amino acid adenylation domain-containing protein	17079.7	-2.28603	0.205039	0.203664	-11.2245	3.09e-29	7.71295e-28	-1
lcl|CP020619.1_cds_ARG46137.1_1696	B7H15_08625	hypothetical protein	3909.01	-1.66104	0.31621	0.178284	-9.31683	1.19866e-20	1.65743e-19	-1
lcl|CP020619.1_cds_ARG45252.1_768	B7H15_03955	7-carboxy-7-deazaguanine synthase QueE	413.576	-2.85409	0.138304	0.292502	-9.75749	1.71341e-22	2.72163e-21	-1
lcl|CP020619.1_cds_ARG47370.1_2191	B7H15_11295	GHKL domain-containing protein	22852.4	-3.3045	0.101215	0.266395	-12.4045	2.47005e-35	8.18522e-34	-1
lcl|CP020619.1_cds_ARG44839.1_331	B7H15_01665	DUF4467 domain-containing protein	249.873	-1.75251	0.296785	0.178818	-9.80052	1.12009e-22	1.80908e-21	-1
lcl|CP020619.1_cds_ARG45055.1_558	B7H15_02905	Mini-ribonuclease 3	1663.74	-2.13081	0.22833	0.251322	-8.47839	2.28322e-17	2.58138e-16	-1
lcl|CP020619.1_cds_ARG45045.1_546	B7H15_02845	pyridoxal 5\\'-phosphate synthase glutaminase subunit PdxT	1346.72	-3.53421	0.0863168	0.247539	-14.2774	3.02684e-46	1.81799e-44	-1
lcl|CP020619.1_cds_ARG45548.1_1081	B7H15_05540	phosphoribosylformylglycinamidine synthase subunit PurL	4061.73	-3.69434	0.0772488	0.455104	-8.11758	4.75581e-16	4.81087e-15	-1
lcl|CP020619.1_cds_ARG44815.1_306	B7H15_01540	WXG100 family type VII secretion effector EsxA	4082.95	-5.8267	0.0176192	0.213907	-27.2394	2.2166e-163	4.26031e-160	-1
lcl|CP020619.1_cds_ARG45985.1_1538	B7H15_07835	ferredoxin	799.523	-1.8578	0.275896	0.412598	-4.5027	6.70946e-06	2.25447e-05	-1
lcl|CP020619.1_cds_ARG45054.1_557	B7H15_02900	cysteine--tRNA ligase	4341.13	-2.09057	0.234787	0.238329	-8.77179	1.75853e-18	2.1666e-17	-1
lcl|CP020619.1_cds_ARG46514.1_2100	B7H15_10840	complement inhibitor SCIN-A	2459.85	-2.53865	0.172104	0.321121	-7.90558	2.66692e-15	2.53753e-14	-1
lcl|CP020619.1_cds_ARG45385.1_912	B7H15_04685	DUF4888 domain-containing protein	355.398	-2.95768	0.128721	0.364395	-8.11669	4.79076e-16	4.82086e-15	-1
lcl|CP020619.1_cds_ARG44801.1_291	B7H15_01465	ribose transporter RbsU	345.899	-2.83057	0.140577	0.450856	-6.27821	3.42499e-10	1.94759e-09	-1
lcl|CP020619.1_cds_ARG47131.1_2764	B7H15_14230	heavy metal translocating P-type ATPase	1616.94	-3.08654	0.117723	0.1784	-17.3012	4.60412e-67	7.37427e-65	-1
lcl|CP020619.1_cds_ARG45526.1_1057	B7H15_05420	cysteine protease staphopain B	4131.69	-4.82633	0.0352477	0.29533	-16.3421	4.94967e-60	5.28514e-58	-1
lcl|CP020619.1_cds_ARG44726.1_209	B7H15_01055	glucose-specific PTS transporter subunit IIBC	1127.71	-2.12171	0.229774	0.331709	-6.39632	1.5917e-10	9.44211e-10	-1
lcl|CP020619.1_cds_ARG45076.1_580	B7H15_03015	ribulokinase	185.801	-1.77789	0.29161	0.187459	-9.48417	2.44328e-21	3.61229e-20	-1
lcl|CP020619.1_cds_ARG47311.1_252	B7H15_01270	ABC transporter substrate-binding protein	488.054	-1.69698	0.308432	0.283436	-5.98717	2.13529e-09	1.1092e-08	-1
lcl|CP020619.1_cds_ARG45044.1_545	B7H15_02840	pyridoxal 5\\'-phosphate synthase lyase subunit PdxS	1160.97	-3.58483	0.0833411	0.219357	-16.3424	4.92441e-60	5.28514e-58	-1
lcl|CP020619.1_cds_ARG47246.1_2884	B7H15_14830	transcriptional regulator IcaR	1106.97	-4.37201	0.048294	0.29053	-15.0484	3.53569e-51	2.61369e-49	-1
lcl|CP020619.1_cds_ARG45556.1_1089	B7H15_05580	ECF transporter S component	3100.77	-1.78345	0.290489	0.163134	-10.9324	8.06986e-28	1.84646e-26	-1
lcl|CP020619.1_cds_ARG46939.1_2556	B7H15_13190	sucrose-specific PTS transporter subunit IIBC	284.548	-2.13553	0.227584	0.615656	-3.4687	0.000522987	0.00128376	-1
lcl|CP020619.1_cds_ARG44825.1_316	B7H15_01590	DNA/RNA non-specific endonuclease	829.923	-1.93249	0.261976	0.167235	-11.5555	6.92213e-31	1.87385e-29	-1
lcl|CP020619.1_cds_ARG46640.1_2237	B7H15_11550	sensor histidine kinase KdpD	388.015	-1.96796	0.255615	0.139927	-14.0641	6.30946e-45	3.30482e-43	-1
lcl|CP020619.1_cds_ARG45272.1_788	B7H15_04055	peptide MFS transporter	2191.16	-1.84695	0.27798	0.155008	-11.9152	9.86614e-33	2.91734e-31	-1
lcl|CP020619.1_cds_ARG45696.1_1236	B7H15_06320	hypothetical protein	373.436	-2.94201	0.130127	0.242361	-12.1389	6.56654e-34	2.069e-32	-1
lcl|CP020619.1_cds_ARG45458.1_987	B7H15_05060	MAP domain-containing protein	1777.55	-1.99903	0.250169	0.263004	-7.60075	2.94419e-14	2.54898e-13	-1
lcl|CP020619.1_cds_ARG45580.1_1114	B7H15_05705	ABC transporter ATP-binding protein	173.125	-1.60201	0.329417	0.353591	-4.5307	5.87884e-06	2.01052e-05	-1
lcl|CP020619.1_cds_ARG45992.1_1546	B7H15_07875	Panton-Valentine bi-component leukocidin subunit F	2603.34	-4.4836	0.0446995	0.263006	-17.0475	3.6468e-65	5.39166e-63	-1
lcl|CP020619.1_cds_ARG45555.1_1088	B7H15_05575	energy-coupling factor ABC transporter ATP-binding protein	6826.29	-1.6281	0.323514	0.194156	-8.38554	5.04948e-17	5.6425e-16	-1
lcl|CP020619.1_cds_ARG44612.1_81	B7H15_00415	copper-translocating P-type ATPase	2876.08	-3.50422	0.0881303	0.244624	-14.3249	1.52846e-46	9.47642e-45	-1
lcl|CP020619.1_cds_ARG44956.1_454	B7H15_02280	myeloperoxidase inhibitor SPIN	5596.77	-3.16449	0.11153	0.456945	-6.92532	4.34987e-12	3.14303e-11	-1
lcl|CP020619.1_cds_ARG46701.1_2300	B7H15_11865	deoxyribose-phosphate aldolase	736.423	-1.60151	0.329533	0.253422	-6.31952	2.62384e-10	1.50988e-09	-1
lcl|CP020619.1_cds_ARG44811.1_302	B7H15_01520	hypothetical protein	376.081	-1.68133	0.311795	0.215569	-7.79952	6.21453e-15	5.66082e-14	-1
lcl|CP020619.1_cds_ARG45552.1_1085	B7H15_05560	bifunctional phosphoribosylaminoimidazolecarboxamide formyltransferase/IMP cyclohydrolase	3557.17	-3.4259	0.0930467	0.372785	-9.19002	3.92783e-20	5.27922e-19	-1
lcl|CP020619.1_cds_ARG44579.1_41	B7H15_00215	recombinase family protein	155.591	-2.20907	0.216273	0.279569	-7.9017	2.75125e-15	2.60488e-14	-1
lcl|CP020619.1_cds_ARG44731.1_215	B7H15_01085	type I restriction endonuclease subunit R	1036.98	-2.46877	0.180645	0.157705	-15.6544	3.09978e-55	2.83704e-53	-1
lcl|CP020619.1_cds_ARG46597.1_2189	B7H15_11285	accessory gene regulator AgrB	12048.1	-3.17901	0.110414	0.225947	-14.0697	5.83232e-45	3.20278e-43	-1
lcl|CP020619.1_cds_ARG45631.1_1166	B7H15_05965	succinate dehydrogenase cytochrome b558 subunit	1662.18	-1.97185	0.254927	0.400475	-4.92377	8.48929e-07	3.29625e-06	-1
lcl|CP020619.1_cds_ARG44844.1_336	B7H15_01690	5\\'-nucleotidase, lipoprotein e(P4) family	370.961	-3.69168	0.0773918	0.413775	-8.92194	4.58183e-19	5.7936e-18	-1
lcl|CP020619.1_cds_ARG44713.1_194	B7H15_00980	acyl-CoA/acyl-ACP dehydrogenase	3986.36	-2.78432	0.145157	0.240563	-11.5742	5.56925e-31	1.52916e-29	-1
lcl|CP020619.1_cds_ARG47222.1_2860	B7H15_14710	PTS mannose transporter subunit IIABC	271.872	-1.66508	0.315327	0.203295	-8.19045	2.60259e-16	2.67496e-15	-1
lcl|CP020619.1_cds_ARG46509.1_2095	B7H15_10815	extracellular adherence protein Eap/Map	2447.04	-4.61956	0.0406793	0.371835	-12.4237	1.94383e-35	6.55447e-34	-1
lcl|CP020619.1_cds_ARG46291.1_1858	B7H15_09440	formate--tetrahydrofolate ligase	9725.99	-2.68402	0.155607	0.198252	-13.5384	9.2795e-42	4.05345e-40	-1
lcl|CP020619.1_cds_ARG46744.1_2345	B7H15_12135	staphyloferrin A export MFS transporter	213.309	-2.16471	0.223027	0.465221	-4.65308	3.2702e-06	1.17483e-05	-1
lcl|CP020619.1_cds_ARG47332.1_875	B7H15_04500	phosphoglycerate mutase family protein	364.759	-2.05636	0.240422	0.19941	-10.3122	6.20524e-25	1.24234e-23	-1
lcl|CP020619.1_cds_ARG46584.1_2174	B7H15_11210	TrkH family potassium uptake protein	333.933	-2.66391	0.157791	0.212846	-12.5157	6.12667e-36	2.14099e-34	-1
lcl|CP020619.1_cds_ARG45113.1_617	B7H15_03200	hypothetical protein	9728.13	-3.2308	0.106521	0.326075	-9.90815	3.83696e-23	6.58449e-22	-1
lcl|CP020619.1_cds_ARG44921.1_417	B7H15_02095	peroxiredoxin	25487.5	-1.93606	0.261329	0.146549	-13.211	7.58286e-40	3.16832e-38	-1
lcl|CP020619.1_cds_ARG44709.1_190	B7H15_00960	DUF4242 domain-containing protein	2494.75	-2.2934	0.203994	0.278918	-8.22249	1.99314e-16	2.08196e-15	-1
lcl|CP020619.1_cds_ARG47196.1_2833	B7H15_14575	assimilatory sulfite reductase (NADPH) flavoprotein subunit	1620.1	-2.46146	0.181563	0.452127	-5.44417	5.20472e-08	2.29965e-07	-1
lcl|CP020619.1_cds_ARG44717.1_199	B7H15_01005	4\\'-phosphopantetheinyl transferase superfamily protein	2581.59	-1.85319	0.276779	0.231241	-8.0141	1.10946e-15	1.09917e-14	-1
lcl|CP020619.1_cds_ARG44542.1_2	B7H15_00010	DNA polymerase III subunit beta	2290.45	-1.77214	0.292774	0.156823	-11.3002	1.30878e-29	3.35397e-28	-1
lcl|CP020619.1_cds_ARG45057.1_560	B7H15_02915	NYN domain-containing protein	2384.89	-2.36851	0.193646	0.239921	-9.87204	5.50323e-23	9.19758e-22	-1
lcl|CP020619.1_cds_ARG46882.1_2494	B7H15_12880	hypothetical protein	178.314	-1.89246	0.269347	0.245135	-7.72008	1.16258e-14	1.03929e-13	-1
lcl|CP020619.1_cds_ARG47088.1_2717	B7H15_13995	fructose-1,6-bisphosphatase	1582.54	-1.90178	0.267613	0.433006	-4.39204	1.12293e-05	3.66429e-05	-1
lcl|CP020619.1_cds_ARG45173.1_688	B7H15_03555	metal ABC transporter ATP-binding protein	7961.23	-3.35506	0.0977295	0.491602	-6.82475	8.8077e-12	6.08935e-11	-1
lcl|CP020619.1_cds_ARG47305.1_165	B7H15_00835	hypothetical protein	124.293	-1.63924	0.321026	0.283266	-5.78692	7.16905e-09	3.47953e-08	-1
lcl|CP020619.1_cds_ARG44565.1_25	B7H15_00135	LPXTG-anchored adenosine synthase AdsA	396.633	-3.51336	0.0875737	0.367488	-9.56048	1.17211e-21	1.74635e-20	-1
lcl|CP020619.1_cds_ARG44671.1_148	B7H15_00750	cell-wall-anchored protein SasD	682.906	-4.75929	0.0369242	0.328481	-14.4888	1.42621e-47	9.45236e-46	-1
lcl|CP020619.1_cds_ARG45249.1_765	B7H15_03940	DoxX family protein	1915.82	-4.18701	0.0549014	0.409246	-10.2311	1.43944e-24	2.73921e-23	-1
lcl|CP020619.1_cds_ARG47231.1_2869	B7H15_14755	accessory Sec system protein Asp3	237.307	-2.84048	0.139614	0.326903	-8.68908	3.65394e-18	4.36204e-17	-1
lcl|CP020619.1_cds_ARG44923.1_419	B7H15_02105	L-cystine transporter	4687.04	-4.30334	0.0506483	0.283113	-15.2001	3.53221e-52	2.82871e-50	-1
lcl|CP020619.1_cds_ARG45993.1_1547	B7H15_07880	Panton-Valentine bi-component leukocidin subunit S	2391.95	-5.70847	0.019124	0.284097	-20.0934	8.42696e-90	4.04916e-87	-1
lcl|CP020619.1_cds_ARG45707.1_1247	B7H15_06375	50S ribosomal protein L28	6406.57	-1.59109	0.331921	0.290833	-5.4708	4.48006e-08	1.99321e-07	-1
lcl|CP020619.1_cds_ARG47251.1_2891	B7H15_14865	Lipase 1	32023.2	-1.86099	0.275286	0.317012	-5.87043	4.34667e-09	2.16995e-08	-1
lcl|CP020619.1_cds_ARG46469.1_2054	B7H15_10610	sodium/proline symporter PutP	851.182	-1.85225	0.27696	0.167352	-11.068	1.79312e-28	4.36249e-27	-1
lcl|CP020619.1_cds_ARG45553.1_1086	B7H15_05565	phosphoribosylamine--glycine ligase	2992.18	-3.3793	0.0961012	0.335864	-10.0615	8.17317e-24	1.48196e-22	-1
lcl|CP020619.1_cds_ARG45253.1_769	B7H15_03960	6-carboxytetrahydropterin synthase QueD	261.095	-2.72442	0.15131	0.330709	-8.23812	1.74937e-16	1.84741e-15	-1
lcl|CP020619.1_cds_ARG45058.1_561	B7H15_02920	RNA polymerase sigma factor	1718.37	-2.23688	0.212145	0.244502	-9.14869	5.76258e-20	7.58609e-19	-1
lcl|CP020619.1_cds_ARG47221.1_2859	B7H15_14705	PTS mannose transporter subunit IIA	125.35	-1.68153	0.311751	0.284042	-5.92001	3.21918e-09	1.64118e-08	-1
lcl|CP020619.1_cds_ARG47194.1_2831	B7H15_14565	hypothetical protein	184.105	-2.64705	0.159646	0.435588	-6.07696	1.22482e-09	6.55738e-09	-1
lcl|CP020619.1_cds_ARG47268.1_2909	B7H15_14955	lactonase	212.586	-1.63737	0.321443	0.204338	-8.01304	1.11906e-15	1.10299e-14	-1
lcl|CP020619.1_cds_ARG47401.1_2856	B7H15_14690	zinc metalloproteinase aureolysin	886.006	-5.4635	0.0226633	0.314577	-17.3677	1.44837e-67	2.53069e-65	-1
lcl|CP020619.1_cds_ARG46598.1_2190	B7H15_11290	cyclic lactone autoinducer peptide	3534.88	-3.08644	0.117731	0.301205	-10.247	1.22106e-24	2.34689e-23	-1
lcl|CP020619.1_cds_ARG46928.1_2543	B7H15_13125	L-lactate permease	3219.8	-4.01659	0.0617854	0.862606	-4.65635	3.21871e-06	1.16012e-05	-1
lcl|CP020619.1_cds_ARG46290.1_1857	B7H15_09435	haptoglobin-binding heme uptake protein HarA	4106.51	-2.66	0.15822	0.176704	-15.0534	3.27963e-51	2.52138e-49	-1
lcl|CP020619.1_cds_ARG47041.1_2662	B7H15_13720	staphylopine-dependent metal ABC transporter substrate-binding protein CntA	202.555	-1.8729	0.273024	0.322388	-5.80946	6.26755e-09	3.07302e-08	-1
lcl|CP020619.1_cds_ARG46050.1_1608	B7H15_08185	hypothetical protein	313.324	-1.60385	0.328997	0.225192	-7.12217	1.06241e-12	8.03919e-12	-1
lcl|CP020619.1_cds_ARG46699.1_2298		#N/A	2347.54	-1.8535	0.27672	0.309729	-5.98427	2.17369e-09	1.1261e-08	-1
lcl|CP020619.1_cds_ARG44920.1_416	B7H15_02090	alkyl hydroperoxide reductase subunit F	59051.5	-2.07502	0.237333	0.158441	-13.0965	3.44933e-39	1.41056e-37	-1
lcl|CP020619.1_cds_ARG45145.1_660	B7H15_03415	hypothetical protein	6934.4	-2.19901	0.217786	0.318425	-6.90592	4.98793e-12	3.56387e-11	-1
lcl|CP020619.1_cds_ARG45248.1_764	B7H15_03935	response regulator transcription factor SaeR	4088.19	-2.82954	0.140677	0.379965	-7.44685	9.55964e-14	7.91967e-13	-1
lcl|CP020619.1_cds_ARG44605.1_74	B7H15_00380	IS110 family transposase	318.545	-1.82266	0.2827	0.166739	-10.9312	8.17936e-28	1.8495e-26	-1
lcl|CP020619.1_cds_ARG47274.1_2915	B7H15_14985	anion permease	760.655	-2.63247	0.161268	0.198883	-13.2363	5.41682e-40	2.31358e-38	-1
lcl|CP020619.1_cds_ARG47033.1_2654	B7H15_13680	DUF1307 domain-containing protein	971.949	-1.73523	0.300361	0.416833	-4.16289	3.14242e-05	9.64813e-05	-1
lcl|CP020619.1_cds_ARG46168.1_1729	B7H15_08790	acetyl-CoA carboxylase biotin carboxylase subunit	933.341	-1.85808	0.275843	0.280569	-6.62255	3.53065e-11	2.26197e-10	-1
lcl|CP020619.1_cds_ARG47285.1_2928	B7H15_15050	cold-shock protein	2784.85	-1.73565	0.300275	0.772884	-2.24567	0.0247249	0.0429667	-1
lcl|CP020619.1_cds_ARG45084.1_588	B7H15_03055	Cof-type HAD-IIB family hydrolase	1689.71	-1.73358	0.300706	0.453285	-3.82447	0.000131051	0.000367172	-1
lcl|CP020619.1_cds_ARG44710.1_191	B7H15_00965	ABC transporter ATP-binding protein	2870.97	-2.4615	0.181558	0.268608	-9.1639	5.00544e-20	6.63479e-19	-1
lcl|CP020619.1_cds_ARG44607.1_76	B7H15_00390	nickel ABC transporter substrate-binding protein	161.23	-2.40013	0.189447	0.275826	-8.70162	3.27183e-18	3.93028e-17	-1
lcl|CP020619.1_cds_ARG44712.1_193	B7H15_00975	ABC transporter permease	2552.92	-2.65931	0.158296	0.20413	-13.0275	8.5358e-39	3.34812e-37	-1
lcl|CP020619.1_cds_ARG47232.1_2870	B7H15_14760	accessory Sec system protein Asp2	361.82	-3.11622	0.115325	0.333063	-9.35624	8.26285e-21	1.16774e-19	-1
lcl|CP020619.1_cds_ARG44859.1_351	B7H15_01765	YSIRK domain-containing triacylglycerol lipase Lip2/Geh	23627.7	-4.34602	0.0491721	0.281487	-15.4395	8.87681e-54	7.41792e-52	-1
lcl|CP020619.1_cds_ARG46599.1_2192	B7H15_11300	LytTR family DNA-binding domain-containing protein	17823.1	-3.25989	0.104394	0.237193	-13.7436	5.56352e-43	2.48676e-41	-1
lcl|CP020619.1_cds_ARG45542.1_1073	B7H15_05500	DUF5011 domain-containing protein	1054.69	-1.73828	0.299726	0.175194	-9.92205	3.33817e-23	5.78015e-22	-1
lcl|CP020619.1_cds_ARG45172.1_687	B7H15_03550	metal ABC transporter permease	7753.43	-3.41771	0.0935767	0.485774	-7.03559	1.98419e-12	1.47815e-11	-1
lcl|CP020619.1_cds_ARG44714.1_195	B7H15_00985	DUF2294 domain-containing protein	5454.74	-2.09717	0.233716	0.308469	-6.79864	1.05612e-11	7.22368e-11	-1
lcl|CP020619.1_cds_ARG46620.1_2217	B7H15_11425	threonine ammonia-lyase IlvA	235.034	-1.88962	0.269878	0.235348	-8.02906	9.82228e-16	9.78157e-15	-1
lcl|CP020619.1_cds_ARG47195.1_2832	B7H15_14570	NAD(P)-binding protein	1026.58	-2.71623	0.152171	0.400611	-6.78024	1.1998e-11	8.1441e-11	-1
lcl|CP020619.1_cds_ARG44670.1_147	B7H15_00745	superoxide dismutase	607.178	-1.94702	0.259351	0.281428	-6.91837	4.56877e-12	3.27656e-11	-1
lcl|CP020619.1_cds_ARG44738.1_222	B7H15_01120	peptide ABC transporter substrate-binding protein	506.969	-3.89254	0.0673331	0.445097	-8.74538	2.22263e-18	2.72095e-17	-1
lcl|CP020619.1_cds_ARG44711.1_192	B7H15_00970	ABC transporter substrate-binding protein	3428.93	-2.64569	0.159797	0.252321	-10.4854	1.00792e-25	2.03918e-24	-1
lcl|CP020619.1_cds_ARG45544.1_1077	B7H15_05520	5-(carboxyamino)imidazole ribonucleotide synthase	2050.09	-3.57628	0.0838361	0.458049	-7.80764	5.8269e-15	5.35852e-14	-1
lcl|CP020619.1_cds_ARG46712.1_2311	B7H15_11920	hypothetical protein	454.379	-2.24421	0.211069	0.400721	-5.60043	2.13817e-08	9.78468e-08	-1
lcl|CP020619.1_cds_ARG46294.1_1861	B7H15_09455	acetoin utilization protein AcuC	661.08	-1.59154	0.331817	0.406613	-3.91414	9.07281e-05	0.00025988	-1
lcl|CP020619.1_cds_ARG44799.1_289	B7H15_01455	ribokinase	427.345	-2.3335	0.198402	0.393772	-5.92602	3.10364e-09	1.58649e-08	-1
lcl|CP020619.1_cds_ARG47114.1_2746	B7H15_14140	sterile alpha motif-like domain-containing protein	2252.26	-3.33352	0.0991997	0.399576	-8.34265	7.26465e-17	8.02452e-16	-1
lcl|CP020619.1_cds_ARG47295.1_2938	B7H15_15100	50S ribosomal protein L34	809.954	-1.75676	0.295912	0.366685	-4.79092	1.66015e-06	6.18375e-06	-1
lcl|CP020619.1_cds_ARG44840.1_332	B7H15_01670	DUF4064 domain-containing protein	429.524	-2.1454	0.226033	0.170038	-12.6172	1.69824e-36	6.27695e-35	-1
lcl|CP020619.1_cds_ARG45247.1_763	B7H15_03930	two-component system sensor histidine kinase SaeS	5048.9	-2.77541	0.146055	0.336652	-8.24415	1.66336e-16	1.76628e-15	-1
lcl|CP020619.1_cds_ARG44735.1_219	B7H15_01105	ABC transporter ATP-binding protein	536.14	-2.09701	0.233742	0.242024	-8.66445	4.53707e-18	5.38287e-17	-1
lcl|CP020619.1_cds_ARG46053.1_1611	B7H15_08200	hypothetical protein	355.461	-1.62468	0.324282	0.178468	-9.10349	8.74742e-20	1.14371e-18	-1
lcl|CP020619.1_cds_ARG47307.1_200	B7H15_01010	YagU family protein	986.398	-3.60178	0.0823675	0.7761	-4.64087	3.46939e-06	1.23714e-05	-1
lcl|CP020619.1_cds_ARG45250.1_766	B7H15_03945	DM13 domain-containing protein	2849.02	-3.42671	0.0929943	0.463189	-7.39809	1.38159e-13	1.13479e-12	-1

## Sheet: 8h Mutant - Mutant CO2
8h Mutant - Mutant CO2		cut off
		> 10
B7H15_11965	PTS sugar transporter subunit IIA	12.885
B7H15_06510	type I DNA topoisomerase	11.848
B7H15_04515	organic hydroperoxide resistance protein	23.725
B7H15_11085	AAA family ATPase	14.853
B7H15_11960	BglG family transcription antiterminator	11.655
B7H15_12280	acetolactate synthase AlsS	12.816
B7H15_11080	recombinase RecT	17.693
B7H15_05030	ATP-dependent chaperone ClpB	10.532
B7H15_04345	type I glyceraldehyde-3-phosphate dehydrogenase	10.429
B7H15_02050	PepSY domain-containing protein	17.55
B7H15_07490	GNAT family N-acetyltransferase	10.589
B7H15_11120	phage antirepressor KilAC domain-containing protein	16.542
B7H15_03185	APC family permease	15.079
B7H15_12275	acetolactate decarboxylase	11.544
B7H15_00590	Na/Pi cotransporter family protein	10.981
		< 0,1
B7H15_03545	metal ABC transporter substrate-binding protein	0.0124
B7H15_09310	alanine dehydrogenase	0.0468
B7H15_04935	ornithine--oxo-acid transaminase	0.0558
B7H15_05975	succinate dehydrogenase iron-sulfur subunit	0.0444
B7H15_04460	cold-shock protein	0.0863
B7H15_09445	acetate--CoA ligase	0.00782
B7H15_09235	citrate synthase	0.0929
B7H15_00945	aldehyde dehydrogenase family protein	0.0568
B7H15_08295	alpha-glucosidase	0.0585
B7H15_03020	NAD-dependent epimerase/dehydratase family protein	0.0133
B7H15_07450	2-oxoglutarate dehydrogenase E1 component	0.0492
B7H15_05230	YjcG family protein	0.0757
B7H15_09190	type I glyceraldehyde-3-phosphate dehydrogenase	0.0215
B7H15_11295	GHKL domain-containing protein	0.0244
B7H15_02845	pyridoxal 5\\'-phosphate synthase glutaminase subunit PdxT	0.0994
B7H15_01540	WXG100 family type VII secretion effector EsxA	0.00634
B7H15_05420	cysteine protease staphopain B	0.00523
B7H15_02840	pyridoxal 5\\'-phosphate synthase lyase subunit PdxS	0.0904
B7H15_07445	dihydrolipoyllysine-residue succinyltransferase	0.0559
B7H15_01070	PTS transporter subunit EIIC	0.0282
B7H15_06320	hypothetical protein	0.0509
B7H15_05060	MAP domain-containing protein	0.0996
B7H15_07875	Panton-Valentine bi-component leukocidin subunit F	0.0122
B7H15_06770	aquaporin family protein	0.0623
B7H15_00415	copper-translocating P-type ATPase	0.0506
B7H15_02280	myeloperoxidase inhibitor SPIN	0.0205
B7H15_11865	deoxyribose-phosphate aldolase	0.0989
B7H15_11285	accessory gene regulator AgrB	0.0301
B7H15_05965	succinate dehydrogenase cytochrome b558 subunit	0.0398
B7H15_11995	arginase	0.0857
B7H15_10815	extracellular adherence protein Eap/Map	0.0226
B7H15_09440	formate--tetrahydrofolate ligase	0.0503
B7H15_09635	proline dehydrogenase	0.0446
B7H15_13120	malate dehydrogenase (quinone)	0.0773
B7H15_13995	fructose-1,6-bisphosphatase	0.0425
B7H15_03555	metal ABC transporter ATP-binding protein	0.014
B7H15_09230	NADP-dependent isocitrate dehydrogenase	0.0955
B7H15_00990	NAD-dependent formate dehydrogenase	0.00412
B7H15_03940	DoxX family protein	0.0202
B7H15_02105	L-cystine transporter	0.0496
B7H15_07880	Panton-Valentine bi-component leukocidin subunit S	0.00717
B7H15_13955	MFS transporter	0.0506
B7H15_10610	sodium/proline symporter PutP	0.0684
B7H15_09750	phosphoenolpyruvate carboxykinase (ATP)	0.0132
B7H15_14690	zinc metalloproteinase aureolysin	0.0368
B7H15_11290	cyclic lactone autoinducer peptide	0.0234
B7H15_09435	haptoglobin-binding heme uptake protein HarA	0.0447
B7H15_03935	response regulator transcription factor SaeR	0.0792
B7H15_12920	imidazolonepropionase	0.0319
B7H15_13540	amino acid permease	0.0707
B7H15_01765	YSIRK domain-containing triacylglycerol lipase Lip2/Geh	0.0159
B7H15_11300	LytTR family DNA-binding domain-containing protein	0.0296
B7H15_03550	metal ABC transporter permease	0.0103
B7H15_05970	succinate dehydrogenase flavoprotein subunit	0.0531
B7H15_09455	acetoin utilization protein AcuC	0.038
B7H15_04210	ribosome-associated translation inhibitor RaiA	0.0799
B7H15_14215	L-glutamate gamma-semialdehyde dehydrogenase	0.0316
B7H15_03930	two-component system sensor histidine kinase SaeS	0.0845
B7H15_03945	DM13 domain-containing protein	0.0259
B7H15_04940	Glu/Leu/Phe/Val dehydrogenase	0.0425

## Sheet: dmpsABC(A)-dmpsABC(CO2) 8h
ID	Gene	Annotation	baseMean	log2FoldChange	Fold change mut (A) 8h vs mut CO2 8h	lfcSE	stat	pvalue	padj	filter
lcl|CP020619.1_cds_ARG46568.1_2155	B7H15_11115	hypothetical protein	568.93	2.6695	6.36207	0.438337	6.09006	1.12866e-09	4.03964e-09	1
lcl|CP020619.1_cds_ARG46721.1_2320	B7H15_11965	PTS sugar transporter subunit IIA	755.705	3.68765	12.8852	0.314752	11.7161	1.05473e-31	1.55938e-30	1
lcl|CP020619.1_cds_ARG45097.1_601	B7H15_03120	6-phospho-3-hexuloisomerase	4479.84	3.17314	9.02006	0.196513	16.1472	1.18887e-58	5.31397e-57	1
lcl|CP020619.1_cds_ARG45733.1_1274	B7H15_06510	type I DNA topoisomerase	3421.83	3.56661	11.8483	0.163694	21.7882	3.0018e-105	4.43805e-103	1
lcl|CP020619.1_cds_ARG45075.1_579	B7H15_03010	protein deglycase HchA	11536.7	2.78915	6.91221	0.323159	8.63089	6.08781e-18	4.20891e-17	1
lcl|CP020619.1_cds_ARG46799.1_2405	B7H15_12435	50S ribosomal protein L14	1368.92	2.39008	5.24186	0.358622	6.66461	2.65367e-11	1.14358e-10	1
lcl|CP020619.1_cds_ARG45354.1_878	B7H15_04515	organic hydroperoxide resistance protein	2773.55	4.56838	23.7257	0.383866	11.901	1.16959e-32	1.81286e-31	1
lcl|CP020619.1_cds_ARG46472.1_2057	B7H15_10625	DNA helicase PcrA	1346.43	1.67549	3.19427	0.160306	10.4518	1.43717e-25	1.53458e-24	1
lcl|CP020619.1_cds_ARG46185.1_1747	B7H15_08880	LLM class flavin-dependent oxidoreductase	705.642	1.68716	3.22023	0.132335	12.7492	3.1495e-37	6.11448e-36	1
lcl|CP020619.1_cds_ARG46794.1_2400	B7H15_12410	50S ribosomal protein L6	1716.66	2.10104	4.29018	0.351815	5.972	2.34365e-09	8.04374e-09	1
lcl|CP020619.1_cds_ARG45404.1_931	B7H15_04780	DUF3055 domain-containing protein	144.276	2.06244	4.17693	0.293631	7.02392	2.15726e-12	1.01375e-11	1
lcl|CP020619.1_cds_ARG46792.1_2398	B7H15_12400	30S ribosomal protein S5	1852.86	2.02167	4.06053	0.316621	6.38514	1.71245e-10	6.68968e-10	1
lcl|CP020619.1_cds_ARG46562.1_2149	B7H15_11085	AAA family ATPase	1588.88	3.89273	14.8535	0.433662	8.9764	2.79762e-19	2.1004e-18	1
lcl|CP020619.1_cds_ARG46213.1_1775	B7H15_09025	DUF4930 family protein	141.205	1.87602	3.67062	0.206913	9.06672	1.22654e-19	9.42964e-19	1
lcl|CP020619.1_cds_ARG46685.1_2284	B7H15_11785	aldehyde dehydrogenase family protein	8582.05	2.42954	5.38721	0.374432	6.4886	8.66391e-11	3.52051e-10	1
lcl|CP020619.1_cds_ARG46131.1_1689	B7H15_08590	glycine--tRNA ligase	3682.68	1.94752	3.85712	0.230802	8.43807	3.22628e-17	2.13825e-16	1
lcl|CP020619.1_cds_ARG46592.1_2184	B7H15_11260	hypothetical protein	1218.95	1.68759	3.22119	0.200493	8.41719	3.85617e-17	2.52094e-16	1
lcl|CP020619.1_cds_ARG47378.1_2424	B7H15_12530	AEC family transporter	218.883	1.59304	3.01685	0.208949	7.62406	2.45816e-14	1.35375e-13	1
lcl|CP020619.1_cds_ARG46887.1_2500	B7H15_12910	SDR family oxidoreductase	3054.27	2.02531	4.07079	0.288981	7.00844	2.40985e-12	1.12149e-11	1
lcl|CP020619.1_cds_ARG46861.1_2471	B7H15_12765	NAD/NADP-dependent octopine/nopaline dehydrogenase family protein	901.541	1.87711	3.6734	0.378939	4.95361	7.28483e-07	1.918e-06	1
lcl|CP020619.1_cds_ARG46863.1_2473	B7H15_12775	CHAP domain-containing protein	5123.9	3.28641	9.75683	0.444823	7.38813	1.4891e-13	7.73526e-13	1
lcl|CP020619.1_cds_ARG44807.1_298	B7H15_01500	glycine-glycine endopeptidase LytM	1081.69	2.92843	7.61283	0.268962	10.8879	1.31655e-27	1.5524e-26	1
lcl|CP020619.1_cds_ARG46704.1_2303	B7H15_11880	thiol-disulfide oxidoreductase DCC family protein	360.575	2.33053	5.02991	0.413032	5.6425	1.67601e-08	5.23787e-08	1
lcl|CP020619.1_cds_ARG44784.1_272	B7H15_01370	CDP-glycerol--glycerophosphate glycerophosphotransferase	717.022	3.22158	9.32808	0.227518	14.1597	1.62701e-45	4.11462e-44	1
lcl|CP020619.1_cds_ARG45433.1_961	B7H15_04930	NADH-dependent flavin oxidoreductase	1647.79	3.16464	8.96709	0.259876	12.1775	4.09751e-34	7.03163e-33	1
lcl|CP020619.1_cds_ARG45264.1_780	B7H15_04015	WP_000589260.1	1047.96	1.99219	3.9784	0.37298	5.34127	9.22963e-08	2.67159e-07	1
lcl|CP020619.1_cds_ARG46663.1_2261	B7H15_11670	DUF1146 family protein	447.851	2.6879	6.44376	0.479635	5.60406	2.09383e-08	6.45961e-08	1
lcl|CP020619.1_cds_ARG47092.1_2722	B7H15_14020	N-acetyltransferase	307.951	2.73644	6.66422	0.307976	8.88523	6.37902e-19	4.73378e-18	1
lcl|CP020619.1_cds_ARG46445.1_2028	B7H15_10480	low molecular weight phosphotyrosine protein phosphatase	1488.16	2.1728	4.50899	0.367961	5.90498	3.52688e-09	1.18301e-08	1
lcl|CP020619.1_cds_ARG45014.1_515	B7H15_02610	ribonuclease M5	367.205	1.70599	3.26252	0.163216	10.4523	1.42972e-25	1.53458e-24	1
lcl|CP020619.1_cds_ARG47160.1_2796	B7H15_14390	fructosamine kinase family protein	607.836	2.12437	4.36011	0.430336	4.93652	7.95278e-07	2.0768e-06	1
lcl|CP020619.1_cds_ARG46796.1_2402	gene=rpsN	#N/A	522.5	2.22714	4.68205	0.347726	6.40487	1.505e-10	5.93964e-10	1
lcl|CP020619.1_cds_ARG46798.1_2404	B7H15_12430	50S ribosomal protein L24	1351.57	2.22806	4.68504	0.368107	6.05275	1.42397e-09	5.05893e-09	1
lcl|CP020619.1_cds_ARG45980.1_1533	B7H15_07810	YpdA family putative bacillithiol disulfide reductase	753.547	1.76539	3.39965	0.154039	11.4607	2.07935e-30	2.75621e-29	1
lcl|CP020619.1_cds_ARG46720.1_2319	B7H15_11960	BglG family transcription antiterminator	1185.68	3.54293	11.6555	0.320753	11.0457	2.30017e-28	2.79806e-27	1
lcl|CP020619.1_cds_ARG46770.1_2374	B7H15_12280	acetolactate synthase AlsS	2883.61	3.67988	12.8161	0.437033	8.42015	3.75994e-17	2.46642e-16	1
lcl|CP020619.1_cds_ARG46561.1_2148	B7H15_11080	recombinase RecT	939.695	4.14514	17.6934	0.423163	9.79561	1.17585e-22	1.08134e-21	1
lcl|CP020619.1_cds_ARG46142.1_1702	B7H15_08655	50S ribosomal protein L11 methyltransferase	1103.73	2.23483	4.70708	0.151192	14.7814	1.93125e-49	5.45862e-48	1
lcl|CP020619.1_cds_ARG47142.1_2776	B7H15_14290	lytic transglycosylase IsaA	15495.9	1.88307	3.68858	0.243657	7.72835	1.08947e-14	6.14062e-14	1
lcl|CP020619.1_cds_ARG46519.1_2106	B7H15_10870	staphylokinase	182.49	2.77332	6.83679	0.408594	6.78747	1.14117e-11	5.06541e-11	1
lcl|CP020619.1_cds_ARG45561.1_1095	B7H15_05610	hypothetical protein	2043.55	1.61556	3.0643	0.635637	2.54163	0.0110336	0.0174827	1
lcl|CP020619.1_cds_ARG45452.1_981	B7H15_05030	ATP-dependent chaperone ClpB	1909.13	3.39675	10.5323	0.199132	17.0578	3.05905e-65	1.63319e-63	1
lcl|CP020619.1_cds_ARG45663.1_1200	B7H15_06140	bacillithiol biosynthesis cysteine-adding enzyme BshC	1074.11	1.6258	3.08614	0.205689	7.90416	2.69736e-15	1.57578e-14	1
lcl|CP020619.1_cds_ARG46315.1_1883	B7H15_09565	rRNA pseudouridine synthase	1024.34	1.84097	3.5825	0.106981	17.2083	2.29973e-66	1.33942e-64	1
lcl|CP020619.1_cds_ARG46517.1_2103	B7H15_10855	#N/A	172.536	1.66382	3.16854	0.410194	4.05617	4.9884e-05	0.000108581	1
lcl|CP020619.1_cds_ARG46708.1_2307	B7H15_11900	SDR family oxidoreductase	1648.76	2.99819	7.98996	0.443765	6.75625	1.41612e-11	6.22834e-11	1
lcl|CP020619.1_cds_ARG44991.1_492	B7H15_02470	glutamate synthase large subunit	3196.09	3.13197	8.76629	0.258699	12.1066	9.74432e-34	1.62857e-32	1
lcl|CP020619.1_cds_ARG45224.1_740	B7H15_03815	hypothetical protein	3418.71	1.95682	3.88207	0.503551	3.88605	0.000101889	0.000213323	1
lcl|CP020619.1_cds_ARG45064.1_567	B7H15_02950	50S ribosomal protein L10	1627.6	2.05672	4.16039	0.209085	9.83677	7.8184e-23	7.29464e-22	1
lcl|CP020619.1_cds_ARG46661.1_2259	B7H15_11660	3-hydroxyacyl-ACP dehydratase FabZ	1390.04	1.878	3.67566	0.152501	12.3147	7.54728e-35	1.35569e-33	1
lcl|CP020619.1_cds_ARG46126.1_1684	B7H15_08565	tRNA (adenine(22)-N(1))-methyltransferase TrmK	306.516	2.14163	4.41262	0.215445	9.94053	2.7734e-23	2.66524e-22	1
lcl|CP020619.1_cds_ARG46225.1_1788	B7H15_09090	uroporphyrinogen-III synthase	242.309	1.85463	3.61658	0.253367	7.31993	2.48106e-13	1.25821e-12	1
lcl|CP020619.1_cds_ARG46590.1_2182	B7H15_11250	WP_000917289.1	561.567	1.7877	3.45264	0.368891	4.84615	1.25882e-06	3.22594e-06	1
lcl|CP020619.1_cds_ARG44571.1_31	B7H15_00165	glycerophosphoryl diester phosphodiesterase	560.894	1.59679	3.0247	0.225742	7.07354	1.51036e-12	7.22116e-12	1
lcl|CP020619.1_cds_ARG45096.1_600	B7H15_03115	3-hexulose-6-phosphate synthase	4479.8	3.12415	8.7189	0.223134	14.0012	1.53205e-44	3.77514e-43	1
lcl|CP020619.1_cds_ARG46797.1_2403	B7H15_12425	50S ribosomal protein L5	2005.57	2.26386	4.80275	0.36279	6.24014	4.37185e-10	1.64436e-09	1
lcl|CP020619.1_cds_ARG44701.1_182	B7H15_00920	capsular polysaccharide type 5/8 biosynthesis epimerase CapN	131.314	1.92132	3.7877	0.227024	8.46307	2.6042e-17	1.73794e-16	1
lcl|CP020619.1_cds_ARG46662.1_2260	B7H15_11665	UDP-N-acetylglucosamine 1-carboxyvinyltransferase	3648.12	2.04187	4.1178	0.328672	6.2125	5.21493e-10	1.92752e-09	1
lcl|CP020619.1_cds_ARG44846.1_338	B7H15_01700	FtsX-like permease family protein	1299.35	2.11261	4.32473	0.403436	5.23654	1.63618e-07	4.63825e-07	1
lcl|CP020619.1_cds_ARG45322.1_844	B7H15_04340	sugar-binding transcriptional regulator	7563.82	3.28845	9.77062	0.46346	7.09543	1.2895e-12	6.21155e-12	1
lcl|CP020619.1_cds_ARG47240.1_2878	B7H15_14800	#N/A	528.347	3.17831	9.05247	0.458509	6.93184	4.15394e-12	1.89191e-11	1
lcl|CP020619.1_cds_ARG46803.1_2409	B7H15_12455	30S ribosomal protein S3	2259.23	2.26643	4.81131	0.332424	6.8179	9.23804e-12	4.12919e-11	1
lcl|CP020619.1_cds_ARG45920.1_1469	B7H15_07485	undecaprenyldiphospho-muramoylpentapeptide beta-N-acetylglucosaminyltransferase	963.132	2.69805	6.48924	0.160348	16.8263	1.56705e-63	7.52965e-62	1
lcl|CP020619.1_cds_ARG46642.1_2239	B7H15_11560	DEAD/DEAH box helicase	2825.36	1.65482	3.14884	0.4231	3.91118	9.18463e-05	0.000193774	1
lcl|CP020619.1_cds_ARG46690.1_2289	B7H15_11810	CTP synthase	1190.06	1.6813	3.20716	0.192069	8.75361	2.06631e-18	1.47638e-17	1
lcl|CP020619.1_cds_ARG47030.1_2651	B7H15_13665	Txe/YoeB family addiction module toxin	560.43	1.61421	3.06144	0.316627	5.09814	3.43002e-07	9.28521e-07	1
lcl|CP020619.1_cds_ARG45790.1_1333	B7H15_06805	GTPase HflX	420.536	1.71377	3.28016	0.125506	13.6549	1.88815e-42	4.48029e-41	1
lcl|CP020619.1_cds_ARG46801.1_2407	B7H15_12445	50S ribosomal protein L29	552.385	2.09849	4.28262	0.355411	5.90441	3.53906e-09	1.18503e-08	1
lcl|CP020619.1_cds_ARG44559.1_19	B7H15_00095	adenylosuccinate synthase	860.708	2.75046	6.72933	0.435341	6.31796	2.65047e-10	1.01681e-09	1
lcl|CP020619.1_cds_ARG45265.1_781	B7H15_04020	ABC transporter permease/substrate-binding protein	1872.2	1.8958	3.72128	0.175659	10.7925	3.73553e-27	4.35133e-26	1
lcl|CP020619.1_cds_ARG45323.1_845	B7H15_04345	type I glyceraldehyde-3-phosphate dehydrogenase	14667.8	3.38266	10.4299	0.640097	5.28461	1.25976e-07	3.60307e-07	1
lcl|CP020619.1_cds_ARG47016.1_2635	B7H15_13585	MFS transporter	1140.19	2.61627	6.13162	0.139552	18.7476	2.02699e-78	1.94794e-76	1
lcl|CP020619.1_cds_ARG44912.1_408	B7H15_02050	PepSY domain-containing protein	6379.88	4.13342	17.5503	0.542735	7.61591	2.61841e-14	1.43788e-13	1
lcl|CP020619.1_cds_ARG47072.1_2699	B7H15_13905	fibronectin-binding protein FnbA	510.915	2.05451	4.15403	0.209855	9.79016	1.24094e-22	1.13576e-21	1
lcl|CP020619.1_cds_ARG45397.1_924	B7H15_04745	nitronate monooxygenase family protein	542.783	2.1463	4.42692	0.284222	7.55149	4.30297e-14	2.32967e-13	1
lcl|CP020619.1_cds_ARG44989.1_490	B7H15_02460	YibE/F family protein	451.263	2.49897	5.65281	0.199592	12.5204	5.77383e-36	1.08797e-34	1
lcl|CP020619.1_cds_ARG45921.1_1470	B7H15_07490	GNAT family N-acetyltransferase	325.577	3.40451	10.5891	0.362271	9.39769	5.57766e-21	4.54249e-20	1
lcl|CP020619.1_cds_ARG46624.1_2221	B7H15_11470	RNA polymerase sigma factor SigB	3613.27	2.03463	4.09718	0.277008	7.34504	2.05704e-13	1.05712e-12	1
lcl|CP020619.1_cds_ARG45475.1_1004	B7H15_05145	adaptor protein MecA	3008.4	1.62555	3.08561	0.149473	10.8752	1.51265e-27	1.77276e-26	1
lcl|CP020619.1_cds_ARG46527.1_2114	B7H15_10910	hypothetical protein	288.362	2.8777	7.34977	0.373906	7.69632	1.40042e-14	7.87018e-14	1
lcl|CP020619.1_cds_ARG46410.1_1990	B7H15_10140	helix-turn-helix transcriptional regulator	450.138	1.81142	3.50987	0.283238	6.3954	1.60133e-10	6.28112e-10	1
lcl|CP020619.1_cds_ARG44878.1_371	B7H15_01865	LLM class flavin-dependent oxidoreductase	1309.39	1.65331	3.14555	0.175889	9.39973	5.47025e-21	4.47397e-20	1
lcl|CP020619.1_cds_ARG46800.1_2406	B7H15_12440	30S ribosomal protein S17	883.295	2.00943	4.02622	0.350157	5.73864	9.54407e-09	3.06239e-08	1
lcl|CP020619.1_cds_ARG47318.1_549	B7H15_02860	UvrB/UvrC motif-containing protein	1139.39	1.73604	3.3312	0.235279	7.37867	1.59883e-13	8.28289e-13	1
lcl|CP020619.1_cds_ARG46722.1_2321	B7H15_11970	mannitol-1-phosphate 5-dehydrogenase	1316.57	2.90468	7.48851	0.251118	11.567	6.05663e-31	8.37471e-30	1
lcl|CP020619.1_cds_ARG46323.1_1891	B7H15_09605	WP_000764419.1	448.751	2.76938	6.81815	0.175017	15.8235	2.1438e-56	8.40893e-55	1
lcl|CP020619.1_cds_ARG47115.1_2747	B7H15_14145	CHAP domain-containing protein	357.084	2.75357	6.74383	0.337108	8.16822	3.12983e-16	1.9723e-15	1
lcl|CP020619.1_cds_ARG45919.1_1468	B7H15_07480	phosphatase PAP2 family protein	905.274	2.18724	4.55435	0.120637	18.1308	1.82173e-73	1.52233e-71	1
lcl|CP020619.1_cds_ARG45237.1_753	B7H15_03880	multidrug efflux MFS transporter NorA	447.921	2.33875	5.05864	0.144924	16.1378	1.38362e-58	6.04391e-57	1
lcl|CP020619.1_cds_ARG45661.1_1198	B7H15_06130	YjjG family noncanonical pyrimidine nucleotidase	627.905	2.09825	4.28188	0.11987	17.5044	1.32627e-68	8.49695e-67	1
lcl|CP020619.1_cds_ARG46802.1_2408	B7H15_12450	50S ribosomal protein L16	1682.99	2.3622	5.14154	0.367785	6.42278	1.33811e-10	5.32475e-10	1
lcl|CP020619.1_cds_ARG46569.1_2156	B7H15_11120	phage antirepressor KilAC domain-containing protein	1553.35	4.04809	16.5424	0.451912	8.9577	3.31527e-19	2.47936e-18	1
lcl|CP020619.1_cds_ARG45073.1_577	B7H15_03000	amidohydrolase	774.301	2.22832	4.68589	0.234319	9.5098	1.91038e-21	1.63189e-20	1
lcl|CP020619.1_cds_ARG44623.1_93	B7H15_00475	#N/A	430.823	2.6429	6.24588	0.287419	9.1953	3.73944e-20	2.94558e-19	1
lcl|CP020619.1_cds_ARG46080.1_1638	B7H15_08335	BrxA/BrxB family bacilliredoxin	552.733	1.61549	3.06417	0.172063	9.38899	6.05774e-21	4.91265e-20	1
lcl|CP020619.1_cds_ARG45929.1_1478	B7H15_07530	thymidylate synthase	920.146	1.96301	3.89875	0.347078	5.65582	1.55103e-08	4.87105e-08	1
lcl|CP020619.1_cds_ARG47013.1_2632	B7H15_13570	NAD(P)-dependent oxidoreductase	670.798	2.98297	7.9061	0.193147	15.4441	8.27316e-54	2.83947e-52	1
lcl|CP020619.1_cds_ARG45223.1_739	B7H15_03810	YaiI/YqxD family protein	619.66	2.10943	4.3152	0.420106	5.02118	5.13553e-07	1.3671e-06	1
lcl|CP020619.1_cds_ARG44847.1_339	B7H15_01705	ABC transporter ATP-binding protein	1372.5	2.32799	5.02107	0.321722	7.23603	4.61994e-13	2.30998e-12	1
lcl|CP020619.1_cds_ARG45306.1_825	B7H15_04240	HD domain-containing protein	409.658	1.85437	3.61594	0.423717	4.37644	1.20633e-05	2.7885e-05	1
lcl|CP020619.1_cds_ARG46810.1_2416	B7H15_12490	30S ribosomal protein S10	1076.69	2.18736	4.55472	0.353788	6.1827	6.3015e-10	2.30256e-09	1
lcl|CP020619.1_cds_ARG46942.1_2559	B7H15_13205	pyridoxamine 5\\'-phosphate oxidase family protein	3336.32	2.69942	6.49541	0.433485	6.22725	4.74695e-10	1.77503e-09	1
lcl|CP020619.1_cds_ARG46804.1_2410	B7H15_12460	50S ribosomal protein L22	1185.34	2.3098	4.95815	0.346272	6.67048	2.54962e-11	1.10121e-10	1
lcl|CP020619.1_cds_ARG47269.1_2910	B7H15_14960	#N/A	1571.32	2.8021	6.97457	0.427504	6.55457	5.58041e-11	2.29669e-10	1
lcl|CP020619.1_cds_ARG46793.1_2399	B7H15_12405	50S ribosomal protein L18	1360.73	1.96257	3.89755	0.343911	5.70662	1.1524e-08	3.65497e-08	1
lcl|CP020619.1_cds_ARG46795.1_2401	B7H15_12415	30S ribosomal protein S8	1493.81	1.96883	3.91451	0.331853	5.93284	2.97736e-09	1.01104e-08	1
lcl|CP020619.1_cds_ARG45110.1_614	B7H15_03185	APC family permease	3440.31	3.91453	15.0796	0.344042	11.378	5.37986e-30	6.98655e-29	1
lcl|CP020619.1_cds_ARG46272.1_1838	B7H15_09340	tRNA 4-thiouridine(8) synthase ThiI	254.046	2.033	4.09254	0.221391	9.18283	4.19903e-20	3.2941e-19	1
lcl|CP020619.1_cds_ARG47080.1_2707	B7H15_13945	DUF2188 domain-containing protein	1746.15	3.16167	8.94866	0.560747	5.63833	1.71711e-08	5.34891e-08	1
lcl|CP020619.1_cds_ARG45270.1_786	B7H15_04045	diacylglycerol kinase family lipid kinase	2313.41	1.76861	3.40725	0.465558	3.7989	0.000145338	0.000301338	1
lcl|CP020619.1_cds_ARG45225.1_741	B7H15_03820	undecaprenyl-diphosphate phosphatase	1000.61	2.23321	4.70179	0.149945	14.8935	3.63338e-50	1.05808e-48	1
lcl|CP020619.1_cds_ARG46409.1_1989	B7H15_10135	DUF445 domain-containing protein	458.607	2.66157	6.32723	0.243911	10.9121	1.00949e-27	1.20511e-26	1
lcl|CP020619.1_cds_ARG46529.1_2116	B7H15_10920	phage tail tape measure protein	274.702	3.27203	9.66001	0.440286	7.43159	1.07298e-13	5.65004e-13	1
lcl|CP020619.1_cds_ARG47340.1_1192	B7H15_06095	YfcC family protein	316.182	2.09364	4.26824	0.327126	6.40011	1.55265e-10	6.10265e-10	1
lcl|CP020619.1_cds_ARG46809.1_2415	B7H15_12485	50S ribosomal protein L3	2568.65	2.02364	4.06609	0.30749	6.58117	4.66766e-11	1.94183e-10	1
lcl|CP020619.1_cds_ARG45979.1_1532	B7H15_07805	asparaginase	675.069	1.77352	3.41886	0.27016	6.5647	5.21378e-11	2.15041e-10	1
lcl|CP020619.1_cds_ARG47239.1_2877	B7H15_14795	#N/A	630.251	2.17824	4.52601	0.545711	3.99156	6.56401e-05	0.000140961	1
lcl|CP020619.1_cds_ARG46440.1_2022	B7H15_10450	type 1 glutamine amidotransferase	6534.28	3.17477	9.03026	0.326499	9.72366	2.39024e-22	2.167e-21	1
lcl|CP020619.1_cds_ARG46719.1_2318	B7H15_11955	PTS mannitol transporter subunit IICB	163.858	1.70704	3.26491	0.19431	8.78515	1.56151e-18	1.11986e-17	1
lcl|CP020619.1_cds_ARG46860.1_2470	B7H15_12760	Na+/H+ antiporter NhaC	556.896	1.78328	3.44208	0.230526	7.73571	1.02825e-14	5.81265e-14	1
lcl|CP020619.1_cds_ARG46806.1_2412	B7H15_12470	50S ribosomal protein L2	3822.65	2.32673	5.01668	0.331707	7.01442	2.30903e-12	1.07717e-11	1
lcl|CP020619.1_cds_ARG47167.1_2803	B7H15_14425	CocE/NonD family hydrolase	152.539	2.04898	4.13813	0.195858	10.4616	1.29696e-25	1.40834e-24	1
lcl|CP020619.1_cds_ARG46769.1_2373	B7H15_12275	acetolactate decarboxylase	1040.39	3.52916	11.5447	0.417676	8.44953	2.9247e-17	1.94508e-16	1
lcl|CP020619.1_cds_ARG46230.1_1793	B7H15_09115	ATP-dependent Clp protease ATP-binding subunit ClpX	5597.15	1.88804	3.70133	0.173047	10.9106	1.02585e-27	1.21708e-26	1
lcl|CP020619.1_cds_ARG46805.1_2411	B7H15_12465	30S ribosomal protein S19	784.461	2.06331	4.17945	0.308756	6.68266	2.34642e-11	1.01572e-10	1
lcl|CP020619.1_cds_ARG46816.1_2422	B7H15_12520	glucose uptake protein GlcU	544.537	2.50283	5.66795	0.139156	17.9857	2.52075e-72	2.0187e-70	1
lcl|CP020619.1_cds_ARG46625.1_2222	B7H15_11475	anti-sigma B factor RsbW	1694.61	2.10256	4.29472	0.364967	5.76097	8.36309e-09	2.70149e-08	1
lcl|CP020619.1_cds_ARG46581.1_2170	B7H15_11190	ArgE/DapE family deacylase	2058.98	2.59635	6.04754	0.270874	9.58509	9.23776e-22	8.07045e-21	1
lcl|CP020619.1_cds_ARG46473.1_2058	B7H15_10630	heptaprenylglyceryl phosphate synthase	275.187	1.6775	3.19873	0.241662	6.94152	3.87915e-12	1.77096e-11	1
lcl|CP020619.1_cds_ARG44640.1_115	B7H15_00585	MFS transporter	248.806	1.79432	3.46852	0.298084	6.01951	1.74949e-09	6.12481e-09	1
lcl|CP020619.1_cds_ARG45396.1_923	B7H15_04740	HlyC/CorC family transporter	931.853	2.07526	4.21421	0.354141	5.85998	4.62922e-09	1.53403e-08	1
lcl|CP020619.1_cds_ARG46808.1_2414	B7H15_12480	50S ribosomal protein L4	2291.78	2.20946	4.62502	0.332683	6.64135	3.10826e-11	1.3217e-10	1
lcl|CP020619.1_cds_ARG46322.1_1890	B7H15_09600	TIGR01212 family radical SAM protein	756.087	3.03337	8.18719	0.174168	17.4164	6.19985e-68	3.84391e-66	1
lcl|CP020619.1_cds_ARG46577.1_2166	B7H15_11170	site-specific integrase	103.902	2.39845	5.27237	0.412335	5.81675	6.00012e-09	1.96796e-08	1
lcl|CP020619.1_cds_ARG46187.1_1749	B7H15_08890	CsbD family protein	222.725	1.6081	3.0485	0.561775	2.86254	0.00420261	0.00702384	1
lcl|CP020619.1_cds_ARG44648.1_125	B7H15_00635	staphyloferrin B ABC transporter permease subunit SirC	771.15	1.65009	3.13854	0.274171	6.01848	1.76061e-09	6.15255e-09	1
lcl|CP020619.1_cds_ARG46807.1_2413	B7H15_12475	50S ribosomal protein L23	922.63	2.20558	4.61261	0.326783	6.74938	1.48475e-11	6.50041e-11	1
lcl|CP020619.1_cds_ARG47122.1_2754	B7H15_14180	ATP-dependent Clp protease ATP-binding subunit ClpL	3859.33	2.53864	5.8104	0.7124	3.5635	0.000365944	0.000714055	1
lcl|CP020619.1_cds_ARG45147.1_662	B7H15_03425	alpha/beta hydrolase	1222.78	2.28211	4.86389	0.416669	5.47704	4.32496e-08	1.28899e-07	1
lcl|CP020619.1_cds_ARG45740.1_1281	B7H15_06545	30S ribosomal protein S2	2480.03	2.06054	4.17144	0.255061	8.07863	6.54963e-16	4.04771e-15	1
lcl|CP020619.1_cds_ARG47152.1_2787	B7H15_14345	amidohydrolase family protein	766.853	2.31386	4.97211	0.23385	9.89462	4.39275e-23	4.17964e-22	1
lcl|CP020619.1_cds_ARG44992.1_493	B7H15_02475	glutamate synthase subunit beta	1456.38	3.10877	8.62646	0.248179	12.5263	5.36112e-36	1.0202e-34	1
lcl|CP020619.1_cds_ARG47184.1_2821	B7H15_14515	betaine-aldehyde dehydrogenase	917.788	2.28643	4.87847	0.197928	11.5518	7.22749e-31	9.92231e-30	1
lcl|CP020619.1_cds_ARG47112.1_2743	B7H15_14125	LrgB family protein	2592.05	1.83726	3.5733	0.470165	3.90768	9.31858e-05	0.00019617	1
lcl|CP020619.1_cds_ARG45206.1_721	B7H15_03720	LysM peptidoglycan-binding domain-containing protein	7446.74	1.66283	3.16637	0.155617	10.6854	1.19151e-26	1.34711e-25	1
lcl|CP020619.1_cds_ARG46143.1_1703	B7H15_08660	molecular chaperone DnaJ	1145.18	2.6932	6.46748	0.132269	20.3615	3.66922e-92	4.14838e-90	1
lcl|CP020619.1_cds_ARG46749.1_2351	B7H15_12165	BCCT family transporter	3639.84	2.45866	5.49707	0.501626	4.90139	9.51612e-07	2.45833e-06	1
lcl|CP020619.1_cds_ARG47267.1_2908	B7H15_14950	#N/A	2762.39	3.56859	11.8646	0.239044	14.9286	2.1476e-50	6.35028e-49	1
lcl|CP020619.1_cds_ARG47046.1_2667	B7H15_13745	#N/A	1101.82	2.66229	6.33035	0.378479	7.03418	2.00437e-12	9.48868e-12	1
lcl|CP020619.1_cds_ARG45447.1_976	B7H15_05005	YisL family protein	324.378	2.05991	4.1696	0.410508	5.01795	5.22267e-07	1.38838e-06	1
lcl|CP020619.1_cds_ARG44741.1_225	B7H15_01135	FMN-dependent NADH-azoreductase	992.924	2.28912	4.88756	0.223807	10.2281	1.48471e-24	1.5425e-23	1
lcl|CP020619.1_cds_ARG46791.1_2397	B7H15_12395	50S ribosomal protein L30	657.714	1.76073	3.38871	0.327124	5.38246	7.34734e-08	2.15268e-07	1
lcl|CP020619.1_cds_ARG46061.1_1619	B7H15_08240	DUF309 domain-containing protein	112.666	1.76919	3.40863	0.231644	7.63756	2.21381e-14	1.22621e-13	1
lcl|CP020619.1_cds_ARG46145.1_1705	B7H15_08670	nucleotide exchange factor GrpE	1216.17	2.06235	4.17665	0.240124	8.58868	8.79733e-18	6.03874e-17	1
lcl|CP020619.1_cds_ARG44639.1_114	B7H15_00580	amidohydrolase	204.531	1.73059	3.31862	0.338107	5.11845	3.08059e-07	8.43431e-07	1
lcl|CP020619.1_cds_ARG45747.1_1288	B7H15_06580	RIP metalloprotease RseP	1006.93	1.96232	3.89687	0.15316	12.8122	1.40149e-37	2.77697e-36	1
lcl|CP020619.1_cds_ARG45195.1_710	B7H15_03665	alpha/beta hydrolase	293.099	2.77131	6.82728	0.221689	12.5009	7.3793e-36	1.36375e-34	1
lcl|CP020619.1_cds_ARG46487.1_2072	B7H15_10700	pectate lyase	641.792	1.88628	3.69681	0.270332	6.97763	3.00193e-12	1.39029e-11	1
lcl|CP020619.1_cds_ARG45573.1_1107	B7H15_05670	YkyA family protein	1407.65	1.78364	3.44294	0.391902	4.55124	5.33303e-06	1.2942e-05	1
lcl|CP020619.1_cds_ARG46156.1_1717	B7H15_08730	bis(5\\'-nucleosyl)-tetraphosphatase (symmetrical) YqeK	883.329	1.91677	3.77576	0.270567	7.08426	1.39789e-12	6.70011e-12	1
lcl|CP020619.1_cds_ARG46858.1_2468	B7H15_12750	CHAP domain-containing protein	1126.81	2.36272	5.14339	0.456387	5.17701	2.25476e-07	6.28976e-07	1
lcl|CP020619.1_cds_ARG45497.1_1027	B7H15_05260	TerC family protein	347.126	1.79338	3.46625	0.241025	7.44062	1.00212e-13	5.32063e-13	1
lcl|CP020619.1_cds_ARG45047.1_548	B7H15_02855	CtsR family transcriptional regulator	805.159	1.6763	3.19608	0.189125	8.86344	7.75814e-19	5.66964e-18	1
lcl|CP020619.1_cds_ARG46772.1_2376	B7H15_12290	hypothetical protein	124.046	2.24525	4.74119	0.302976	7.41065	1.2568e-13	6.59994e-13	1
lcl|CP020619.1_cds_ARG46919.1_2533	B7H15_13075	YdcF family protein	529.107	1.62734	3.08943	0.300038	5.42378	5.83516e-08	1.72012e-07	1
lcl|CP020619.1_cds_ARG47361.1_1839	B7H15_09345	cysteine desulfurase	179.917	2.27295	4.83311	0.239846	9.47672	2.62397e-21	2.21196e-20	1
lcl|CP020619.1_cds_ARG46238.1_1802	B7H15_09160	amino acid permease	1208.24	1.69659	3.24133	0.425934	3.98321	6.79896e-05	0.000145681	1
lcl|CP020619.1_cds_ARG45135.1_644	B7H15_03335	aldo/keto reductase	648.715	1.92533	3.79824	0.144867	13.2904	2.63258e-40	5.68518e-39	1
lcl|CP020619.1_cds_ARG46119.1_1677	B7H15_08530	superoxide dismutase	20812	1.6142	3.06141	0.286772	5.62885	1.8142e-08	5.63311e-08	1
lcl|CP020619.1_cds_ARG44622.1_92	B7H15_00470	#N/A	201.646	2.21601	4.64607	0.439247	5.04502	4.53472e-07	1.21389e-06	1
lcl|CP020619.1_cds_ARG46430.1_2012	B7H15_10400	SAV1866 family putative multidrug efflux ABC transporter	522.117	2.16915	4.49757	0.136888	15.8462	1.49437e-56	5.98372e-55	1
lcl|CP020619.1_cds_ARG47302.1_116	B7H15_00590	Na/Pi cotransporter family protein	2719.74	3.45703	10.9817	0.196981	17.5501	5.94045e-69	3.93708e-67	1
lcl|CP020619.1_cds_ARG46146.1_1706	B7H15_08675	heat-inducible transcriptional repressor HrcA	1704.73	1.98321	3.95372	0.247127	8.02506	1.01473e-15	6.11382e-15	1
lcl|CP020619.1_cds_ARG46044.1_1602	B7H15_08155	hypothetical protein	384.979	2.15774	4.46214	0.380134	5.67626	1.37675e-08	4.34502e-08	1
lcl|CP020619.1_cds_ARG45234.1_750	B7H15_03865	hypothetical protein	280.069	1.75942	3.38561	0.20508	8.57918	9.55491e-18	6.53542e-17	1
lcl|CP020619.1_cds_ARG45235.1_751	B7H15_03870	DUF1361 domain-containing protein	393.069	1.72533	3.30655	0.331086	5.21111	1.87717e-07	5.29799e-07	1
lcl|CP020619.1_cds_ARG46447.1_2030	B7H15_10490	YihY/virulence factor BrkB family protein	3621.1	1.73035	3.31808	0.379858	4.55524	5.23246e-06	1.27301e-05	1
lcl|CP020619.1_cds_ARG47183.1_2820	B7H15_14510	choline dehydrogenase	617.706	2.14383	4.41933	0.272656	7.86275	3.75792e-15	2.16249e-14	1
lcl|CP020619.1_cds_ARG46931.1_2547	B7H15_13145	oxidoreductase	660.109	1.79265	3.4645	0.17756	10.096	5.75467e-24	5.73082e-23	1
lcl|CP020619.1_cds_ARG45734.1_1275	B7H15_06515	methylenetetrahydrofolate--tRNA-(uracil(54)-C(5))-methyltransferase (FADH(2)-oxidizing) TrmFO	2634.64	3.18425	9.08979	0.178902	17.7988	7.21834e-71	5.54946e-69	1
lcl|CP020619.1_cds_ARG45763.1_1306	B7H15_06670	insulinase family protein	457.565	1.59561	3.02222	0.241168	6.61617	3.68615e-11	1.5469e-10	1
lcl|CP020619.1_cds_ARG46626.1_2223	B7H15_11480	anti-sigma factor antagonist	1374.41	2.4769	5.56701	0.409879	6.043	1.51275e-09	5.35451e-09	1
lcl|CP020619.1_cds_ARG47273.1_2914	B7H15_14980	#N/A	521.475	2.82321	7.07734	0.470969	5.99446	2.0416e-09	7.09577e-09	1
lcl|CP020619.1_cds_ARG46593.1_2185	B7H15_11265	nitroreductase family protein	493.977	1.66537	3.17196	0.232777	7.15437	8.40565e-13	4.13188e-12	1
lcl|CP020619.1_cds_ARG46902.1_2515	B7H15_12985	DUF805 domain-containing protein	329.596	-2.6456	0.159807	0.181133	-14.6058	2.57892e-48	6.98124e-47	-1
lcl|CP020619.1_cds_ARG46101.1_1659	B7H15_08440	aminomethyl-transferring glycine dehydrogenase subunit GcvPA	3851	-2.61938	0.162738	0.231085	-11.3351	8.79072e-30	1.13394e-28	-1
lcl|CP020619.1_cds_ARG44675.1_152	B7H15_00770	deoxyribose-phosphate aldolase	607.574	-1.66474	0.3154	0.168711	-9.86742	5.76306e-23	5.42971e-22	-1
lcl|CP020619.1_cds_ARG44647.1_124	B7H15_00630	HTH-type transcriptional regulator SarS	323.005	-1.96103	0.256845	0.230047	-8.52449	1.5349e-17	1.0315e-16	-1
lcl|CP020619.1_cds_ARG45432.1_960	B7H15_04925	S1 RNA-binding domain-containing protein	1649.16	-2.45205	0.182751	0.331171	-7.40417	1.31971e-13	6.91138e-13	-1
lcl|CP020619.1_cds_ARG44541.1_1	B7H15_00005	chromosomal replication initiator protein DnaA	1983.27	-2.22614	0.21373	0.132731	-16.7719	3.92042e-63	1.83782e-61	-1
lcl|CP020619.1_cds_ARG46138.1_1697	B7H15_08630	flotillin-like protein FloA	3754.49	-1.8504	0.277316	0.160949	-11.4968	1.36864e-30	1.83952e-29	-1
lcl|CP020619.1_cds_ARG45170.1_685	B7H15_03540	sodium:proton antiporter	1984.96	-2.60549	0.164312	0.182951	-14.2415	5.06632e-46	1.29833e-44	-1
lcl|CP020619.1_cds_ARG46602.1_2196	B7H15_11320	LacI family DNA-binding transcriptional regulator	278.631	-2.05132	0.241263	0.451715	-4.54118	5.59391e-06	1.35069e-05	-1
lcl|CP020619.1_cds_ARG45554.1_1087	B7H15_05570	energy-coupling factor transporter transmembrane protein EcfT	2165.51	-1.938	0.260978	0.23106	-8.38742	4.9694e-17	3.22675e-16	-1
lcl|CP020619.1_cds_ARG45171.1_686	B7H15_03545	metal ABC transporter substrate-binding protein	9567.98	-6.32817	0.0124461	0.467178	-13.5455	8.42336e-42	1.92734e-40	-1
lcl|CP020619.1_cds_ARG46049.1_1607	B7H15_08180	hypothetical protein	171.169	-2.08387	0.235881	0.382054	-5.45438	4.91431e-08	1.45986e-07	-1
lcl|CP020619.1_cds_ARG46062.1_1620	B7H15_08245	site-specific tyrosine recombinase XerD	1115.87	-2.42335	0.186422	0.195414	-12.4011	2.5762e-35	4.67119e-34	-1
lcl|CP020619.1_cds_ARG44549.1_9	B7H15_00045	#N/A	646.361	-1.94515	0.259688	0.417845	-4.6552	3.23674e-06	8.00646e-06	-1
lcl|CP020619.1_cds_ARG46166.1_1727	B7H15_08780	divalent metal cation transporter	772.215	-3.06423	0.119557	0.2373	-12.9129	3.80691e-38	7.70199e-37	-1
lcl|CP020619.1_cds_ARG46650.1_2247	B7H15_11600	HD domain-containing protein	315.481	-1.75533	0.296205	0.188973	-9.28877	1.56088e-20	1.23457e-19	-1
lcl|CP020619.1_cds_2322	B7H15_11975	#N/A	273.479	-1.75494	0.296285	0.186972	-9.38613	6.22452e-21	5.02669e-20	-1
lcl|CP020619.1_cds_ARG47296.1_34	B7H15_00180	WP_001802837.1	7268.55	-2.41785	0.187135	0.24446	-9.89057	4.57399e-23	4.33064e-22	-1
lcl|CP020619.1_cds_ARG46167.1_1728	B7H15_08785	5-oxoprolinase subunit PxpA	561.028	-3.0661	0.119402	0.256031	-11.9755	4.77485e-33	7.58451e-32	-1
lcl|CP020619.1_cds_ARG47233.1_2871	B7H15_14765	#N/A	370.053	-4.13401	0.0569558	0.336606	-12.2815	1.13935e-34	2.00902e-33	-1
lcl|CP020619.1_cds_ARG46266.1_1832	B7H15_09310	alanine dehydrogenase	2863.21	-4.41443	0.0468948	0.386327	-11.4267	3.07752e-30	4.05137e-29	-1
lcl|CP020619.1_cds_ARG47235.1_2873	B7H15_14775	#N/A	10747.2	-6.12722	0.0143062	0.247066	-24.7999	8.97908e-136	2.4654e-133	-1
lcl|CP020619.1_cds_ARG45986.1_1539	B7H15_07840	ECF transporter S component	1305.49	-1.64895	0.318872	0.246741	-6.68292	2.34232e-11	1.01572e-10	-1
lcl|CP020619.1_cds_ARG46170.1_1731	B7H15_08800	biotin-dependent carboxyltransferase family protein	652.196	-2.66742	0.157408	0.317751	-8.39469	4.67127e-17	3.04345e-16	-1
lcl|CP020619.1_cds_ARG47377.1_2379	B7H15_12305	hypothetical protein	747.26	-2.92597	0.131582	0.170797	-17.1313	8.66558e-66	4.8986e-64	-1
lcl|CP020619.1_cds_ARG47225.1_2863	B7H15_14725	#N/A	3165.01	-2.62788	0.161782	0.173227	-15.1702	5.57452e-52	1.75643e-50	-1
lcl|CP020619.1_cds_ARG45434.1_962	B7H15_04935	ornithine--oxo-acid transaminase	3977.98	-4.16199	0.0558621	0.170901	-24.3532	5.35675e-131	1.14396e-128	-1
lcl|CP020619.1_cds_ARG46608.1_2203	B7H15_11355	MutS family DNA mismatch repair protein	330.704	-1.59789	0.330361	0.246742	-6.47595	9.4218e-11	3.8204e-10	-1
lcl|CP020619.1_cds_ARG44633.1_105	B7H15_00535	DNA2/NAM7 family helicase	590.478	-1.94982	0.258849	0.284014	-6.86521	6.63944e-12	2.98853e-11	-1
lcl|CP020619.1_cds_ARG45464.1_993	B7H15_05090	ABC transporter permease	652.405	-2.45343	0.182576	0.333796	-7.35009	1.98071e-13	1.02062e-12	-1
lcl|CP020619.1_cds_ARG45633.1_1168	B7H15_05975	succinate dehydrogenase iron-sulfur subunit	5405.05	-4.49113	0.0444669	0.401535	-11.1849	4.8347e-29	5.99503e-28	-1
lcl|CP020619.1_cds_ARG46740.1_2341	B7H15_12115	ABC transporter substrate-binding protein	1662.2	-2.13597	0.227515	0.70339	-3.03668	0.00239201	0.00416059	-1
lcl|CP020619.1_cds_ARG45586.1_1120	B7H15_05735	Nramp family divalent metal transporter	1092.67	-1.99882	0.250205	0.165455	-12.0807	1.33535e-33	2.21254e-32	-1
lcl|CP020619.1_cds_ARG46171.1_1732	B7H15_08805	5-oxoprolinase subunit PxpB	337.32	-2.68067	0.155969	0.312495	-8.57828	9.63025e-18	6.5636e-17	-1
lcl|CP020619.1_cds_ARG45344.1_867	B7H15_04460	cold-shock protein	3569.48	-3.53395	0.0863329	0.615391	-5.74261	9.32309e-09	2.99648e-08	-1
lcl|CP020619.1_cds_ARG44773.1_260	B7H15_01310	nucleoside hydrolase	206.93	-2.1427	0.226456	0.221552	-9.67131	3.99228e-22	3.56891e-21	-1
lcl|CP020619.1_cds_ARG46292.1_1859	B7H15_09445	acetate--CoA ligase	2700.63	-6.9976	0.00782551	0.455433	-15.3647	2.82236e-53	9.35272e-52	-1
lcl|CP020619.1_cds_ARG46946.1_2563	B7H15_13225	MarR family transcriptional regulator	1680.11	-2.19471	0.218438	0.249268	-8.8046	1.31321e-18	9.52448e-18	-1
lcl|CP020619.1_cds_ARG44966.1_467	B7H15_02345	hypothetical protein	324.094	-1.88311	0.271098	0.23304	-8.08063	6.44316e-16	3.99476e-15	-1
lcl|CP020619.1_cds_ARG46714.1_2313	B7H15_11930	SAP domain-containing protein	283.051	-1.7344	0.300535	0.243756	-7.11529	1.11674e-12	5.43386e-12	-1
lcl|CP020619.1_cds_ARG45190.1_705	B7H15_03640	dihydroxyacetone kinase subunit DhaK	334.653	-2.88765	0.135124	0.342245	-8.43736	3.2459e-17	2.14385e-16	-1
lcl|CP020619.1_cds_ARG45437.1_966	B7H15_04955	glycerophosphodiester phosphodiesterase	212.217	-3.25776	0.104548	0.245537	-13.2679	3.55445e-40	7.59072e-39	-1
lcl|CP020619.1_cds_1074	B7H15_05505	#N/A	305.838	-2.87459	0.136352	0.234418	-12.2627	1.43662e-34	2.51016e-33	-1
lcl|CP020619.1_cds_ARG44722.1_205	B7H15_01035	branched-chain amino acid transport system II carrier protein	685.798	-1.64031	0.320788	0.269366	-6.08951	1.13259e-09	4.04616e-09	-1
lcl|CP020619.1_cds_ARG45046.1_547	B7H15_02850	NupC/NupG family nucleoside CNT transporter	841.084	-2.15725	0.224182	0.135717	-15.8952	6.84278e-57	2.79826e-55	-1
lcl|CP020619.1_cds_ARG46773.1_2378	B7H15_12300	AAA family ATPase	940.758	-2.49615	0.177249	0.21738	-11.4829	1.60838e-30	2.14674e-29	-1
lcl|CP020619.1_cds_ARG44782.1_269	B7H15_01355	2-C-methyl-D-erythritol 4-phosphate cytidylyltransferase	527.329	-1.6045	0.328849	0.221745	-7.23582	4.62716e-13	2.30998e-12	-1
lcl|CP020619.1_cds_2694	B7H15_13880	#N/A	771.195	-2.33764	0.197834	0.182095	-12.8374	1.01178e-37	2.02566e-36	-1
lcl|CP020619.1_cds_ARG45191.1_706	B7H15_03645	dihydroxyacetone kinase subunit L	235.426	-2.9054	0.133471	0.304658	-9.53661	1.47584e-21	1.26632e-20	-1
lcl|CP020619.1_cds_ARG46414.1_1994	B7H15_10160	class II fumarate hydratase	2747.74	-2.85705	0.13802	0.182186	-15.6821	2.00532e-55	7.55732e-54	-1
lcl|CP020619.1_cds_ARG46252.1_1817	B7H15_09235	citrate synthase	4037.85	-3.42664	0.092999	0.288224	-11.8888	1.35298e-32	2.08035e-31	-1
lcl|CP020619.1_cds_ARG44869.1_361	B7H15_01815	PTS ascorbate transporter subunit IIC	242.666	-2.79666	0.14392	0.240673	-11.6202	3.25537e-31	4.56703e-30	-1
lcl|CP020619.1_cds_ARG45466.1_995	B7H15_05100	ATP-binding cassette domain-containing protein	803.069	-2.42131	0.186686	0.332131	-7.29022	3.09443e-13	1.56513e-12	-1
lcl|CP020619.1_cds_ARG46054.1_1612	B7H15_08205	#N/A	383.896	-3.03363	0.12212	0.1818	-16.6866	1.63922e-62	7.50136e-61	-1
lcl|CP020619.1_cds_ARG46853.1_2463	B7H15_12725	HTH-type transcriptional regulator SarR	1764.44	-1.76628	0.293966	0.21485	-8.22099	2.01829e-16	1.28876e-15	-1
lcl|CP020619.1_cds_ARG44706.1_187	B7H15_00945	aldehyde dehydrogenase family protein	3193.91	-4.13573	0.0568881	0.634189	-6.52129	6.97054e-11	2.8505e-10	-1
lcl|CP020619.1_cds_ARG46100.1_1658	B7H15_08435	aminomethyl-transferring glycine dehydrogenase subunit GcvPB	5262.1	-2.81234	0.142364	0.233711	-12.0334	2.37134e-33	3.83002e-32	-1
lcl|CP020619.1_cds_ARG44716.1_197	B7H15_00995	MFS transporter	2690.05	-2.23034	0.213108	0.223069	-9.99845	1.54797e-23	1.51795e-22	-1
lcl|CP020619.1_cds_ARG46072.1_1630	B7H15_08295	alpha-glucosidase	730.236	-4.09444	0.0585396	0.679805	-6.02296	1.71253e-09	6.00637e-09	-1
lcl|CP020619.1_cds_ARG45077.1_581	B7H15_03020	NAD-dependent epimerase/dehydratase family protein	3892.65	-6.223	0.0133872	0.425664	-14.6195	2.10852e-48	5.7894e-47	-1
lcl|CP020619.1_cds_ARG47306.1_198	B7H15_01000	amino acid adenylation domain-containing protein	17079.7	-3.18314	0.110098	0.203976	-15.6055	6.67973e-55	2.42235e-53	-1
lcl|CP020619.1_cds_ARG46137.1_1696	B7H15_08625	hypothetical protein	3909.01	-2.16433	0.223086	0.179398	-12.0644	1.62892e-33	2.6532e-32	-1
lcl|CP020619.1_cds_ARG45913.1_1462	B7H15_07450	2-oxoglutarate dehydrogenase E1 component	13981.2	-4.34351	0.0492575	0.389167	-11.1611	6.32356e-29	7.79096e-28	-1
lcl|CP020619.1_cds_ARG46955.1_2572	B7H15_13270	respiratory nitrate reductase subunit gamma	308.258	-1.85649	0.276147	0.318353	-5.83155	5.49156e-09	1.81229e-08	-1
lcl|CP020619.1_cds_ARG45491.1_1021	B7H15_05230	YjcG family protein	2764.25	-3.72293	0.0757331	0.236491	-15.7424	7.74517e-56	2.97724e-54	-1
lcl|CP020619.1_cds_ARG46244.1_1808	B7H15_09190	type I glyceraldehyde-3-phosphate dehydrogenase	3604.88	-5.53925	0.021504	0.414556	-13.3619	1.00967e-40	2.2052e-39	-1
lcl|CP020619.1_cds_ARG46189.1_1751	B7H15_08900	replication-associated recombination protein A	1282.94	-1.63349	0.322307	0.134922	-12.107	9.70156e-34	1.62857e-32	-1
lcl|CP020619.1_cds_ARG47370.1_2191	B7H15_11295	GHKL domain-containing protein	22852.4	-5.3558	0.0244199	0.267319	-20.0353	2.71439e-89	2.89836e-87	-1
lcl|CP020619.1_cds_ARG44839.1_331	B7H15_01665	DUF4467 domain-containing protein	249.873	-2.03872	0.243379	0.189019	-10.7858	4.01793e-27	4.65208e-26	-1
lcl|CP020619.1_cds_ARG45045.1_546	B7H15_02845	pyridoxal 5\\'-phosphate synthase glutaminase subunit PdxT	1346.72	-3.33023	0.0994261	0.249112	-13.3684	9.25105e-41	2.04374e-39	-1
lcl|CP020619.1_cds_ARG46738.1_2339	gene=fecD	#N/A	313.206	-1.9197	0.264309	0.374042	-5.13231	2.86211e-07	7.85854e-07	-1
lcl|CP020619.1_cds_ARG46655.1_2253	B7H15_11630	hydroxyethylthiazole kinase	654.815	-2.39758	0.189783	0.337646	-7.10087	1.23974e-12	6.01714e-12	-1
lcl|CP020619.1_cds_ARG45016.1_517	B7H15_02620	Veg family protein	2850.52	-2.48604	0.178496	0.302911	-8.20716	2.26487e-16	1.43666e-15	-1
lcl|CP020619.1_cds_ARG44815.1_306	B7H15_01540	WXG100 family type VII secretion effector EsxA	4082.95	-7.29997	0.00634587	0.227105	-32.1436	1.08372e-226	1.04146e-223	-1
lcl|CP020619.1_cds_ARG46656.1_2254	B7H15_11635	bifunctional hydroxymethylpyrimidine kinase/phosphomethylpyrimidine kinase	615.881	-2.11019	0.231617	0.378327	-5.57768	2.43746e-08	7.47177e-08	-1
lcl|CP020619.1_cds_ARG45385.1_912	B7H15_04685	DUF4888 domain-containing protein	355.398	-1.87072	0.273438	0.365842	-5.11345	3.16328e-07	8.61165e-07	-1
lcl|CP020619.1_cds_ARG44801.1_291	B7H15_01465	ribose transporter RbsU	345.899	-3.03354	0.122128	0.448406	-6.76516	1.33162e-11	5.88363e-11	-1
lcl|CP020619.1_cds_ARG47131.1_2764	B7H15_14230	heavy metal translocating P-type ATPase	1616.94	-3.24135	0.105744	0.177503	-18.2609	1.69586e-74	1.48157e-72	-1
lcl|CP020619.1_cds_ARG45526.1_1057	B7H15_05420	cysteine protease staphopain B	4131.69	-7.57869	0.00523103	0.29949	-25.3053	2.79348e-141	1.07381e-138	-1
lcl|CP020619.1_cds_ARG45729.1_1269	B7H15_06485	ADP-forming succinate--CoA ligase subunit beta	5965.91	-2.91662	0.132437	0.286051	-10.1962	2.06278e-24	2.12014e-23	-1
lcl|CP020619.1_cds_ARG44726.1_209	B7H15_01055	glucose-specific PTS transporter subunit IIBC	1127.71	-1.7223	0.303065	0.333055	-5.17121	2.32586e-07	6.47869e-07	-1
lcl|CP020619.1_cds_ARG46883.1_2495	B7H15_12885	alpha-glucoside-specific PTS transporter subunit IIBC	226.234	-1.96686	0.255809	0.273141	-7.2009	5.98174e-13	2.97078e-12	-1
lcl|CP020619.1_cds_ARG45076.1_580	B7H15_03015	ribulokinase	185.801	-2.86515	0.137247	0.191764	-14.941	1.78211e-50	5.43686e-49	-1
lcl|CP020619.1_cds_ARG45044.1_545	B7H15_02840	pyridoxal 5\\'-phosphate synthase lyase subunit PdxS	1160.97	-3.46707	0.090429	0.223642	-15.5028	3.32177e-54	1.16081e-52	-1
lcl|CP020619.1_cds_ARG46649.1_2246	B7H15_11595	cardiolipin synthase	676.571	-1.62088	0.325136	0.151766	-10.6801	1.26096e-26	1.41729e-25	-1
lcl|CP020619.1_cds_ARG44574.1_35	B7H15_00185	DUF3387 domain-containing protein	2941.32	-2.84287	0.139384	0.211039	-13.4708	2.32253e-41	5.19058e-40	-1
lcl|CP020619.1_cds_ARG44857.1_349	B7H15_01755	N-acetylmannosamine-6-phosphate 2-epimerase	113.971	-2.22732	0.213555	0.238667	-9.33231	1.03588e-20	8.29567e-20	-1
lcl|CP020619.1_cds_ARG46063.1_1621	B7H15_08250	transcriptional repressor	1476.38	-1.72054	0.303434	0.181618	-9.47343	2.70814e-21	2.27295e-20	-1
lcl|CP020619.1_cds_ARG45898.1_1446	B7H15_07370	alanine racemase	198.508	-1.82154	0.282919	0.284205	-6.40924	1.46243e-10	5.79545e-10	-1
lcl|CP020619.1_cds_ARG46657.1_2255	B7H15_11640	thiaminase II	428.387	-1.76777	0.293662	0.390633	-4.52541	6.02795e-06	1.44641e-05	-1
lcl|CP020619.1_cds_ARG47246.1_2884	B7H15_14830	#N/A	1106.97	-4.61408	0.0408343	0.294857	-15.6485	3.40023e-55	1.25678e-53	-1
lcl|CP020619.1_cds_ARG45556.1_1089	B7H15_05580	ECF transporter S component	3100.77	-1.84651	0.278063	0.163824	-11.2713	1.8183e-29	2.29919e-28	-1
lcl|CP020619.1_cds_ARG46939.1_2556	B7H15_13190	sucrose-specific PTS transporter subunit IIBC	284.548	-2.07282	0.237694	0.616695	-3.36117	0.00077612	0.00144966	-1
lcl|CP020619.1_cds_ARG45184.1_699	B7H15_03610	nucleoside permease	1412.86	-2.06589	0.23884	0.167888	-12.3051	8.50027e-35	1.51273e-33	-1
lcl|CP020619.1_cds_ARG47171.1_2808	B7H15_14450	acetolactate decarboxylase	276.857	-2.08617	0.235504	0.135595	-15.3854	2.05237e-53	6.92044e-52	-1
lcl|CP020619.1_cds_ARG46384.1_1960	B7H15_09950	lantibiotic dehydratase	224.298	-2.03551	0.243921	0.280337	-7.26095	3.84382e-13	1.92894e-12	-1
lcl|CP020619.1_cds_ARG46640.1_2237	B7H15_11550	sensor histidine kinase KdpD	388.015	-2.01246	0.24785	0.148156	-13.5834	5.0244e-42	1.17767e-40	-1
lcl|CP020619.1_cds_ARG47104.1_2734	B7H15_14080	L-serine ammonia-lyase, iron-sulfur-dependent subunit beta	210.084	-2.74456	0.149213	0.385007	-7.12859	1.01405e-12	4.95931e-12	-1
lcl|CP020619.1_cds_ARG45912.1_1461	B7H15_07445	dihydrolipoyllysine-residue succinyltransferase	7968.88	-4.15877	0.0559868	0.365066	-11.3918	4.59207e-30	6.00406e-29	-1
lcl|CP020619.1_cds_ARG46102.1_1660	B7H15_08445	glycine cleavage system aminomethyltransferase GcvT	1958.54	-2.72754	0.150983	0.161614	-16.8769	6.65657e-64	3.28049e-62	-1
lcl|CP020619.1_cds_ARG44728.1_212	B7H15_01070	PTS transporter subunit EIIC	2595.19	-5.14615	0.0282393	0.637948	-8.06673	7.22078e-16	4.41986e-15	-1
lcl|CP020619.1_cds_ARG45696.1_1236	B7H15_06320	hypothetical protein	373.436	-4.29576	0.0509151	0.253502	-16.9457	2.07159e-64	1.04779e-62	-1
lcl|CP020619.1_cds_ARG45458.1_987	B7H15_05060	MAP domain-containing protein	1777.55	-3.32651	0.0996829	0.26296	-12.6503	1.11492e-36	2.14287e-35	-1
lcl|CP020619.1_cds_ARG45992.1_1546	B7H15_07875	Panton-Valentine bi-component leukocidin subunit F	2603.34	-6.34984	0.0122605	0.266706	-23.8084	2.73126e-125	5.24949e-123	-1
lcl|CP020619.1_cds_ARG46103.1_1661	B7H15_08450	shikimate kinase	180.417	-1.79511	0.288149	0.234447	-7.6568	1.90618e-14	1.06194e-13	-1
lcl|CP020619.1_cds_ARG44634.1_106	B7H15_00540	hypothetical protein	169.013	-1.88212	0.271285	0.277517	-6.78201	1.18519e-11	5.2487e-11	-1
lcl|CP020619.1_cds_ARG45783.1_1326	B7H15_06770	aquaporin family protein	618.054	-4.0037	0.0623399	0.489957	-8.17153	3.04494e-16	1.92512e-15	-1
lcl|CP020619.1_cds_ARG45125.1_632	B7H15_03275	DUF443 domain-containing protein	142.231	-1.93629	0.261287	0.237319	-8.15904	3.37711e-16	2.12118e-15	-1
lcl|CP020619.1_cds_ARG45910.1_1459	B7H15_07435	hypothetical protein	420.717	-2.05121	0.241281	0.186682	-10.9878	4.37644e-28	5.25719e-27	-1
lcl|CP020619.1_cds_ARG45555.1_1088	B7H15_05575	energy-coupling factor ABC transporter ATP-binding protein	6826.29	-1.96569	0.256017	0.194356	-10.1139	4.79579e-24	4.80078e-23	-1
lcl|CP020619.1_cds_ARG44612.1_81	B7H15_00415	copper-translocating P-type ATPase	2876.08	-4.30428	0.0506153	0.247272	-17.4071	7.29193e-68	4.37972e-66	-1
lcl|CP020619.1_cds_ARG44956.1_454	B7H15_02280	myeloperoxidase inhibitor SPIN	5596.77	-5.60484	0.0205483	0.457918	-12.2398	1.90457e-34	3.29783e-33	-1
lcl|CP020619.1_cds_ARG46701.1_2300	B7H15_11865	deoxyribose-phosphate aldolase	736.423	-3.33764	0.0989167	0.254454	-13.1169	2.63518e-39	5.50523e-38	-1
lcl|CP020619.1_cds_ARG44811.1_302	B7H15_01520	hypothetical protein	376.081	-2.09595	0.233914	0.221694	-9.45424	3.25376e-21	2.71901e-20	-1
lcl|CP020619.1_cds_ARG46169.1_1730	B7H15_08795	acetyl-CoA carboxylase biotin carboxyl carrier protein subunit	263.148	-2.96992	0.127633	0.312744	-9.49632	2.17433e-21	1.84914e-20	-1
lcl|CP020619.1_cds_ARG46324.1_1892	B7H15_09610	MarR family transcriptional regulator	1694.28	-2.54817	0.170972	0.236453	-10.7766	4.43932e-27	5.1092e-26	-1
lcl|CP020619.1_cds_ARG44579.1_41	B7H15_00215	recombinase family protein	155.591	-1.86858	0.273843	0.288744	-6.4714	9.7099e-11	3.91246e-10	-1
lcl|CP020619.1_cds_ARG45361.1_885	B7H15_04550	WP_000932219.1	445.894	-3.52873	0.0866455	0.231959	-15.2127	2.91182e-52	9.32754e-51	-1
lcl|CP020619.1_cds_ARG44731.1_215	B7H15_01085	type I restriction endonuclease subunit R	1036.98	-2.56415	0.169089	0.161154	-15.9112	5.30078e-57	2.2148e-55	-1
lcl|CP020619.1_cds_ARG45936.1_1486	B7H15_07570	hyperosmolarity resistance protein Ebh	1278.36	-1.97702	0.254014	0.234476	-8.43167	3.40756e-17	2.24292e-16	-1
lcl|CP020619.1_cds_ARG47003.1_2622	B7H15_13520	multidrug effflux MFS transporter	726.461	-1.63048	0.322981	0.147914	-11.0232	2.95528e-28	3.57236e-27	-1
lcl|CP020619.1_cds_ARG46753.1_2355	B7H15_12185	6-phospho-beta-galactosidase	217.287	-1.66922	0.314423	0.267744	-6.23439	4.53548e-10	1.70258e-09	-1
lcl|CP020619.1_cds_ARG46597.1_2189	B7H15_11285	accessory gene regulator AgrB	12048.1	-5.05165	0.030151	0.227758	-22.1799	5.36902e-109	8.59938e-107	-1
lcl|CP020619.1_cds_ARG47366.1_2010	B7H15_10390	aromatic acid exporter family protein	1067.3	-1.59877	0.330157	0.156542	-10.2131	1.73322e-24	1.79099e-23	-1
lcl|CP020619.1_cds_ARG45465.1_994	B7H15_05095	ABC transporter ATP-binding protein	717.544	-2.48479	0.17865	0.342123	-7.26285	3.79012e-13	1.90696e-12	-1
lcl|CP020619.1_cds_ARG47236.1_2874	B7H15_14780	#N/A	317.478	-2.28894	0.204626	0.142566	-16.0553	5.24635e-58	2.24078e-56	-1
lcl|CP020619.1_cds_ARG45631.1_1166	B7H15_05965	succinate dehydrogenase cytochrome b558 subunit	1662.18	-4.64924	0.0398511	0.401277	-11.5861	4.84616e-31	6.74951e-30	-1
lcl|CP020619.1_cds_ARG46739.1_2340	B7H15_12110	iron ABC transporter permease	314.335	-1.62485	0.324243	0.482038	-3.3708	0.000749511	0.001403	-1
lcl|CP020619.1_cds_ARG47222.1_2860	B7H15_14710	#N/A	271.872	-1.68914	0.310112	0.213503	-7.91154	2.54234e-15	1.49431e-14	-1
lcl|CP020619.1_cds_ARG45074.1_578	B7H15_03005	glycine C-acetyltransferase	2297.45	-2.23735	0.212075	0.237697	-9.41262	4.83913e-21	3.9747e-20	-1
lcl|CP020619.1_cds_ARG46726.1_2326	B7H15_11995	arginase	1216.66	-3.5436	0.0857574	0.291998	-12.1357	6.83499e-34	1.16255e-32	-1
lcl|CP020619.1_cds_ARG46509.1_2095	B7H15_10815	extracellular adherence protein Eap/Map	2447.04	-5.46598	0.0226243	0.371914	-14.6969	6.74849e-49	1.8798e-47	-1
lcl|CP020619.1_cds_2377	B7H15_12295	#N/A	810.886	-1.82225	0.282779	0.350808	-5.19444	2.0534e-07	5.74474e-07	-1
lcl|CP020619.1_cds_ARG46291.1_1858	B7H15_09440	formate--tetrahydrofolate ligase	9725.99	-4.31228	0.0503355	0.198569	-21.7168	1.42319e-104	1.95383e-102	-1
lcl|CP020619.1_cds_ARG47103.1_2733	B7H15_14075	L-serine ammonia-lyase, iron-sulfur-dependent, subunit alpha	339.469	-2.15273	0.224886	0.246461	-8.73459	2.44549e-18	1.73441e-17	-1
lcl|CP020619.1_cds_ARG46900.1_2513	B7H15_12975	ABC transporter permease	292.368	-1.69551	0.308745	0.213309	-7.9486	1.88632e-15	1.11554e-14	-1
lcl|CP020619.1_cds_ARG46744.1_2345	B7H15_12135	staphyloferrin A export MFS transporter	213.309	-2.44781	0.183289	0.461555	-5.30339	1.13673e-07	3.26578e-07	-1
lcl|CP020619.1_cds_ARG47332.1_875	B7H15_04500	phosphoglycerate mutase family protein	364.759	-2.8995	0.134018	0.205923	-14.0805	5.00594e-45	1.24953e-43	-1
lcl|CP020619.1_cds_ARG46584.1_2174	B7H15_11210	TrkH family potassium uptake protein	333.933	-2.79179	0.144407	0.218726	-12.7638	2.60985e-37	5.11851e-36	-1
lcl|CP020619.1_cds_ARG44734.1_218	B7H15_01100	RES domain-containing protein	417.163	-1.83653	0.279995	0.175594	-10.459	1.33283e-25	1.43916e-24	-1
lcl|CP020619.1_cds_ARG45113.1_617	B7H15_03200	#N/A	9728.13	-4.68838	0.0387844	0.328574	-14.2689	3.42039e-46	8.88377e-45	-1
lcl|CP020619.1_cds_ARG44794.1_282	B7H15_01420	GntR family transcriptional regulator	442.675	-3.06843	0.11921	0.154972	-19.7999	2.98129e-87	3.01581e-85	-1
lcl|CP020619.1_cds_ARG44687.1_167	B7H15_00845	#N/A	69.0493	-1.69244	0.309402	0.254936	-6.63871	3.16434e-11	1.34257e-10	-1
lcl|CP020619.1_cds_ARG46328.1_1897	B7H15_09635	proline dehydrogenase	975.707	-4.48481	0.044662	0.400216	-11.206	3.81129e-29	4.75669e-28	-1
lcl|CP020619.1_cds_ARG44921.1_417	B7H15_02095	peroxiredoxin	25487.5	-2.04185	0.242853	0.146516	-13.936	3.82908e-44	9.31581e-43	-1
lcl|CP020619.1_cds_ARG46927.1_2542	B7H15_13120	malate dehydrogenase (quinone)	2136.75	-3.69209	0.0773697	0.119115	-30.9961	6.08805e-211	3.90041e-208	-1
lcl|CP020619.1_cds_ARG45730.1_1270	B7H15_06490	succinate--CoA ligase subunit alpha	10507.6	-3.10169	0.116492	0.289253	-10.7231	7.92829e-27	9.07034e-26	-1
lcl|CP020619.1_cds_ARG44717.1_199	B7H15_01005	4\\'-phosphopantetheinyl transferase superfamily protein	2581.59	-2.24169	0.211439	0.231238	-9.69428	3.18868e-22	2.86385e-21	-1
lcl|CP020619.1_cds_ARG45726.1_1266	B7H15_06470	lipoteichoic acid-specific glycosyltransferase YfhO	755.873	-1.60074	0.329707	0.138644	-11.5457	7.75758e-31	1.05745e-29	-1
lcl|CP020619.1_cds_ARG47088.1_2717	B7H15_13995	fructose-1,6-bisphosphatase	1582.54	-4.55451	0.0425554	0.431551	-10.5538	4.87696e-26	5.32586e-25	-1
lcl|CP020619.1_cds_ARG45173.1_688	B7H15_03555	metal ABC transporter ATP-binding protein	7961.23	-6.15289	0.0140539	0.493013	-12.4802	9.57848e-36	1.75332e-34	-1
lcl|CP020619.1_cds_ARG46251.1_1816	B7H15_09230	NADP-dependent isocitrate dehydrogenase	7666.77	-3.38695	0.0955931	0.282584	-11.9856	4.22587e-33	6.76843e-32	-1
lcl|CP020619.1_cds_ARG44565.1_25	B7H15_00135	LPXTG-anchored adenosine synthase AdsA	396.633	-2.48492	0.178634	0.376907	-6.59293	4.31224e-11	1.79786e-10	-1
lcl|CP020619.1_cds_ARG44715.1_196	B7H15_00990	NAD-dependent formate dehydrogenase	9686.72	-7.92122	0.00412549	0.190189	-41.6492	0	0	-1
lcl|CP020619.1_cds_ARG44671.1_148	B7H15_00750	cell-wall-anchored protein SasD	682.906	-2.48594	0.178508	0.33318	-7.46125	8.57029e-14	4.57558e-13	-1
lcl|CP020619.1_cds_ARG46698.1_2297	B7H15_11850	membrane protein	1173.19	-2.25946	0.208849	0.281519	-8.02596	1.00732e-15	6.08825e-15	-1
lcl|CP020619.1_cds_ARG45249.1_765	B7H15_03940	DoxX family protein	1915.82	-5.62428	0.0202733	0.414429	-13.5711	5.93924e-42	1.37533e-40	-1
lcl|CP020619.1_cds_ARG47231.1_2869	B7H15_14755	#N/A	237.307	-3.18763	0.109756	0.332396	-9.58985	8.82112e-22	7.74164e-21	-1
lcl|CP020619.1_cds_ARG44923.1_419	B7H15_02105	L-cystine transporter	4687.04	-4.33075	0.0496953	0.28421	-15.2378	1.98297e-52	6.45977e-51	-1
lcl|CP020619.1_cds_ARG45993.1_1547	B7H15_07880	Panton-Valentine bi-component leukocidin subunit S	2391.95	-7.12226	0.00717771	0.287782	-24.7488	3.1904e-135	7.66492e-133	-1
lcl|CP020619.1_cds_ARG47081.1_2709	B7H15_13955	MFS transporter	1050.28	-4.30452	0.0506069	0.411979	-10.4484	1.49002e-25	1.58222e-24	-1
lcl|CP020619.1_cds_ARG45707.1_1247	B7H15_06375	50S ribosomal protein L28	6406.57	-2.07114	0.237972	0.291021	-7.1168	1.10464e-12	5.38862e-12	-1
lcl|CP020619.1_cds_ARG47251.1_2891	B7H15_14865	#N/A	32023.2	-8.17874	0.00345108	0.313175	-26.1155	2.42811e-150	1.16671e-147	-1
lcl|CP020619.1_cds_ARG46469.1_2054	B7H15_10610	sodium/proline symporter PutP	851.182	-3.86842	0.0684683	0.173166	-22.3394	1.53052e-110	2.67424e-108	-1
lcl|CP020619.1_cds_ARG47219.1_2857	B7H15_14695	#N/A	1119.19	-3.21258	0.107874	0.173009	-18.5689	5.74091e-77	5.2543e-75	-1
lcl|CP020619.1_cds_ARG46954.1_2571	B7H15_13265	nitrate respiration regulation accessory nitrate sensor NreA	687.626	-1.80837	0.285514	0.200347	-9.02619	1.77755e-19	1.33978e-18	-1
lcl|CP020619.1_cds_ARG45911.1_1460	B7H15_07440	hypothetical protein	2278.5	-1.64047	0.320752	0.114781	-14.2921	2.45019e-46	6.45105e-45	-1
lcl|CP020619.1_cds_ARG47221.1_2859	B7H15_14705	#N/A	125.35	-2.07246	0.237753	0.286763	-7.22709	4.93449e-13	2.45702e-12	-1
lcl|CP020619.1_cds_ARG47194.1_2831	B7H15_14565	hypothetical protein	184.105	-1.89487	0.268898	0.434592	-4.36012	1.29992e-05	2.98857e-05	-1
lcl|CP020619.1_cds_ARG46349.1_1920	B7H15_09750	phosphoenolpyruvate carboxykinase (ATP)	5934.08	-6.23475	0.0132787	0.651985	-9.56271	1.14713e-21	9.93146e-21	-1
lcl|CP020619.1_cds_ARG47268.1_2909	B7H15_14955	#N/A	212.586	-2.0596	0.239882	0.202844	-10.1536	3.19309e-24	3.23007e-23	-1
lcl|CP020619.1_cds_ARG46654.1_2252	B7H15_11625	thiamine phosphate synthase	577.215	-2.58111	0.167113	0.292309	-8.83005	1.04632e-18	7.61754e-18	-1
lcl|CP020619.1_cds_ARG47401.1_2856	B7H15_14690	zinc metalloproteinase aureolysin	886.006	-4.76284	0.0368334	0.314019	-15.1674	5.81409e-52	1.80237e-50	-1
lcl|CP020619.1_cds_ARG46598.1_2190	B7H15_11290	cyclic lactone autoinducer peptide	3534.88	-5.41364	0.0234602	0.307144	-17.6257	1.5629e-69	1.07282e-67	-1
lcl|CP020619.1_cds_ARG45967.1_1519	B7H15_07740	nucleoside-diphosphate kinase	531.994	-2.39475	0.190155	0.296018	-8.0899	5.97145e-16	3.71428e-15	-1
lcl|CP020619.1_cds_ARG46290.1_1857	B7H15_09435	haptoglobin-binding heme uptake protein HarA	4106.51	-4.4813	0.0447708	0.178287	-25.1352	2.04929e-139	6.56455e-137	-1
lcl|CP020619.1_cds_ARG47041.1_2662	B7H15_13720	staphylopine-dependent metal ABC transporter substrate-binding protein CntA	202.555	-2.3265	0.199367	0.324224	-7.17561	7.19878e-13	3.5477e-12	-1
lcl|CP020619.1_cds_ARG47323.1_631	B7H15_03270	WP_000882165.1	174.903	-1.70597	0.306515	0.309251	-5.51646	3.45899e-08	1.04531e-07	-1
lcl|CP020619.1_cds_ARG46050.1_1608	B7H15_08185	hypothetical protein	313.324	-2.67601	0.156473	0.228571	-11.7076	1.16535e-31	1.70977e-30	-1
lcl|CP020619.1_cds_ARG46699.1_2298	0	#N/A	2347.54	-4.45444	0.045612	0.31012	-14.3636	8.75451e-47	2.33697e-45	-1
lcl|CP020619.1_cds_ARG44920.1_416	B7H15_02090	alkyl hydroperoxide reductase subunit F	59051.5	-2.36633	0.193938	0.158427	-14.9364	1.90955e-50	5.73463e-49	-1
lcl|CP020619.1_cds_ARG45145.1_660	B7H15_03415	hypothetical protein	6934.4	-2.87917	0.13592	0.31844	-9.04148	1.54565e-19	1.16958e-18	-1
lcl|CP020619.1_cds_ARG45896.1_1444	B7H15_07360	2,3,4,5-tetrahydropyridine-2,6-dicarboxylate N-acetyltransferase	580.065	-1.59917	0.330066	0.234895	-6.80804	9.89366e-12	4.40176e-11	-1
lcl|CP020619.1_cds_ARG45248.1_764	B7H15_03935	response regulator transcription factor SaeR	4088.19	-3.65735	0.0792555	0.380506	-9.6118	7.12904e-22	6.3143e-21	-1
lcl|CP020619.1_cds_ARG44928.1_424	B7H15_02130	general stress protein	4234.43	-1.9616	0.256743	0.375099	-5.22956	1.69913e-07	4.80961e-07	-1
lcl|CP020619.1_cds_ARG45183.1_698	B7H15_03605	ABC transporter ATP-binding protein/permease	11582.4	-2.84377	0.139297	0.160381	-17.7313	2.40556e-70	1.7124e-68	-1
lcl|CP020619.1_cds_ARG45416.1_943	B7H15_04840	NAD(P)/FAD-dependent oxidoreductase	2079.28	-2.12834	0.228721	0.164651	-12.9264	3.19612e-38	6.53505e-37	-1
lcl|CP020619.1_cds_ARG46737.1_2337	B7H15_12095	hypothetical protein	2748.25	-5.47394	0.0224999	0.581051	-9.42075	4.4789e-21	3.69461e-20	-1
lcl|CP020619.1_cds_ARG47330.1_835	B7H15_04290	#N/A	2034.82	-4.13228	0.0570244	0.24214	-17.0657	2.67362e-65	1.4682e-63	-1
lcl|CP020619.1_cds_ARG44605.1_74	B7H15_00380	IS110 family transposase	318.545	-2.10754	0.232042	0.176396	-11.9478	6.66953e-33	1.04218e-31	-1
lcl|CP020619.1_cds_ARG47274.1_2915	B7H15_14985	#N/A	760.655	-2.64972	0.159351	0.201767	-13.1326	2.14291e-39	4.52602e-38	-1
lcl|CP020619.1_cds_ARG46168.1_1729	B7H15_08790	acetyl-CoA carboxylase biotin carboxylase subunit	933.341	-2.98682	0.126148	0.279886	-10.6715	1.38332e-26	1.54578e-25	-1
lcl|CP020619.1_cds_ARG46889.1_2502	B7H15_12920	imidazolonepropionase	2390	-4.9682	0.0319465	0.425746	-11.6694	1.82691e-31	2.64009e-30	-1
lcl|CP020619.1_cds_ARG44548.1_8	B7H15_00040	histidine ammonia-lyase	409.575	-1.77795	0.291598	0.196023	-9.07008	1.18931e-19	9.18012e-19	-1
lcl|CP020619.1_cds_ARG47007.1_2626	B7H15_13540	amino acid permease	861.738	-3.82049	0.0707811	0.323413	-11.8131	3.34162e-32	5.01765e-31	-1
lcl|CP020619.1_cds_ARG47395.1_2735	B7H15_14085	PTS fructose transporter subunit IIC	335.486	-3.32012	0.100126	0.355809	-9.33117	1.04711e-20	8.35078e-20	-1
lcl|CP020619.1_cds_ARG45123.1_628	B7H15_03255	transposase	728.33	-1.65545	0.317438	0.277156	-5.973	2.32935e-09	8.00896e-09	-1
lcl|CP020619.1_cds_ARG47232.1_2870	B7H15_14760	#N/A	361.82	-3.59751	0.0826119	0.337802	-10.6497	1.74834e-26	1.94238e-25	-1
lcl|CP020619.1_cds_ARG45463.1_992	B7H15_05085	ABC transporter permease	460.131	-1.66625	0.315072	0.287839	-5.78881	7.08879e-09	2.30146e-08	-1
lcl|CP020619.1_cds_ARG44859.1_351	B7H15_01765	YSIRK domain-containing triacylglycerol lipase Lip2/Geh	23627.7	-5.96933	0.0159607	0.281033	-21.2407	4.01721e-100	4.82567e-98	-1
lcl|CP020619.1_cds_ARG46599.1_2192	B7H15_11300	LytTR family DNA-binding domain-containing protein	17823.1	-5.07808	0.0296036	0.237938	-21.342	4.62695e-101	5.92867e-99	-1
lcl|CP020619.1_cds_ARG45172.1_687	B7H15_03550	metal ABC transporter permease	7753.43	-6.60072	0.0103035	0.487809	-13.5314	1.02126e-41	2.30926e-40	-1
lcl|CP020619.1_cds_ARG44663.1_140	B7H15_00710	(S)-acetoin forming diacetyl reductase	1967.49	-1.64086	0.320666	0.225367	-7.28081	3.31812e-13	1.67386e-12	-1
lcl|CP020619.1_cds_ARG44714.1_195	B7H15_00985	DUF2294 domain-containing protein	5454.74	-2.60964	0.16384	0.308274	-8.46533	2.55424e-17	1.71054e-16	-1
lcl|CP020619.1_cds_ARG45681.1_1221	B7H15_06245	bifunctional pyr operon transcriptional regulator/uracil phosphoribosyltransferase PyrR	648.302	-1.76231	0.294777	0.481597	-3.65929	0.00025291	0.000505295	-1
lcl|CP020619.1_cds_ARG45632.1_1167	B7H15_05970	succinate dehydrogenase flavoprotein subunit	7305.28	-4.23398	0.053143	0.425263	-9.95613	2.37111e-23	2.29009e-22	-1
lcl|CP020619.1_cds_ARG44738.1_222	B7H15_01120	peptide ABC transporter substrate-binding protein	506.969	-1.84106	0.279116	0.453424	-4.06036	4.8998e-05	0.000106773	-1
lcl|CP020619.1_cds_ARG46051.1_1609	B7H15_08190	hypothetical protein	624.06	-2.84996	0.1387	0.23594	-12.0792	1.36059e-33	2.23509e-32	-1
lcl|CP020619.1_cds_ARG45589.1_1123	B7H15_05750	DUF5325 family protein	174.483	-2.33508	0.198185	0.351463	-6.6439	3.05495e-11	1.3048e-10	-1
lcl|CP020619.1_cds_ARG47312.1_271	B7H15_01365	CDP-glycerol glycerophosphotransferase family protein	925.284	-1.72937	0.301583	0.218671	-7.90857	2.60358e-15	1.52564e-14	-1
lcl|CP020619.1_cds_ARG45984.1_1537	B7H15_07830	helix-turn-helix domain-containing protein	346.793	-1.74947	0.297411	0.233062	-7.50646	6.07488e-14	3.27057e-13	-1
lcl|CP020619.1_cds_ARG46745.1_2346	B7H15_12140	D-ornithine--citrate ligase SfaD	912.407	-2.40245	0.189144	0.301913	-7.9574	1.75695e-15	1.04546e-14	-1
lcl|CP020619.1_cds_ARG46712.1_2311	B7H15_11920	hypothetical protein	454.379	-2.23764	0.212034	0.399057	-5.60731	2.05496e-08	6.34989e-08	-1
lcl|CP020619.1_cds_ARG46294.1_1861	B7H15_09455	acetoin utilization protein AcuC	661.08	-4.71679	0.0380281	0.403841	-11.6798	1.61639e-31	2.35357e-30	-1
lcl|CP020619.1_cds_ARG45300.1_819	B7H15_04210	ribosome-associated translation inhibitor RaiA	3743.85	-3.64483	0.0799461	0.416843	-8.74388	2.25235e-18	1.60334e-17	-1
lcl|CP020619.1_cds_ARG44799.1_289	B7H15_01455	ribokinase	427.345	-3.29044	0.102207	0.393665	-8.35846	6.35419e-17	4.09824e-16	-1
lcl|CP020619.1_cds_ARG45467.1_996	B7H15_05105	peptide ABC transporter substrate-binding protein	1583.31	-1.9867	0.252316	0.299806	-6.6266	3.43499e-11	1.44465e-10	-1
lcl|CP020619.1_cds_ARG47128.1_2761	B7H15_14215	L-glutamate gamma-semialdehyde dehydrogenase	5517.33	-4.98032	0.0316792	0.464652	-10.7184	8.34576e-27	9.49145e-26	-1
lcl|CP020619.1_cds_ARG45543.1_1075	B7H15_05510	bifunctional methylenetetrahydrofolate dehydrogenase/methenyltetrahydrofolate cyclohydrolase FolD	2905.68	-2.86549	0.137215	0.209424	-13.6827	1.28777e-42	3.09387e-41	-1
lcl|CP020619.1_cds_ARG47114.1_2746	B7H15_14140	sterile alpha motif-like domain-containing protein	2252.26	-2.57455	0.167874	0.400587	-6.42694	1.30195e-10	5.1916e-10	-1
lcl|CP020619.1_cds_ARG46116.1_1674	B7H15_08515	5-formyltetrahydrofolate cyclo-ligase	393.413	-1.59734	0.330486	0.215763	-7.40322	1.32918e-13	6.94208e-13	-1
lcl|CP020619.1_cds_ARG47356.1_1698	B7H15_08635	hypothetical protein	2242.48	-1.8038	0.286419	0.183076	-9.85275	6.66969e-23	6.25324e-22	-1
lcl|CP020619.1_cds_ARG44840.1_332	B7H15_01670	DUF4064 domain-containing protein	429.524	-2.73995	0.14969	0.176651	-15.5105	2.94689e-54	1.04887e-52	-1
lcl|CP020619.1_cds_ARG45247.1_763	B7H15_03930	two-component system sensor histidine kinase SaeS	5048.9	-3.5645	0.084524	0.337145	-10.5726	3.99277e-26	4.3852e-25	-1
lcl|CP020619.1_cds_ARG46053.1_1611	B7H15_08200	#N/A	355.461	-3.13254	0.114028	0.184662	-16.9637	1.52555e-64	7.92462e-63	-1
lcl|CP020619.1_cds_ARG46055.1_1613	B7H15_08210	DUF1672 domain-containing protein	368.409	-2.64674	0.159681	0.22521	-11.7523	6.8719e-32	1.02386e-30	-1
lcl|CP020619.1_cds_ARG45250.1_766	B7H15_03945	DM13 domain-containing protein	2849.02	-5.266	0.0259883	0.465643	-11.3091	1.18303e-29	1.50581e-28	-1
lcl|CP020619.1_cds_ARG45435.1_963	B7H15_04940	Glu/Leu/Phe/Val dehydrogenase	8556.95	-4.55444	0.0425576	0.256626	-17.7474	1.80523e-70	1.33449e-68	-1

## Sheet: JE2 WT (A)-JE2 WT (CO2) 4h
ID	Gene	Annotation	baseMean	log2FoldChange	Flod change WT (A) 4h versus WT (CO2) 4h	lfcSE	stat	pvalue	padj	filter
lcl|CP020619.1_cds_ARG45099.1_603	B7H15_03130	MFS transporter	2293.3	1.69278	3.23278	0.290761	5.82189	5.81875e-09	4.47345e-07	1
lcl|CP020619.1_cds_ARG46849.1_2459	gene=ureE	#N/A	285.611	1.63305	3.10167	0.272271	5.99787	1.99922e-09	1.82976e-07	1
lcl|CP020619.1_cds_ARG47188.1_2825	B7H15_14535	BCCT family transporter	445.021	1.68228	3.20936	0.183919	9.14689	5.85951e-20	3.75399e-17	1
lcl|CP020619.1_cds_ARG46848.1_2458	B7H15_12700	urease subunit alpha	826.77	1.96686	3.90916	0.244	8.0609	7.57352e-16	1.81954e-13	1
lcl|CP020619.1_cds_ARG47184.1_2821	B7H15_14515	betaine-aldehyde dehydrogenase	917.788	2.14381	4.41927	0.19454	11.0199	3.06528e-28	5.89147e-25	1
lcl|CP020619.1_cds_ARG47183.1_2820	B7H15_14510	choline dehydrogenase	617.706	2.21111	4.63031	0.26709	8.27852	1.24716e-16	3.99506e-14	1
lcl|CP020619.1_cds_ARG47306.1_198	B7H15_01000	amino acid adenylation domain-containing protein	17079.7	-1.6241	0.324413	0.202448	-8.02227	1.03807e-15	2.21686e-13	-1
lcl|CP020619.1_cds_ARG45385.1_912	B7H15_04685	DUF4888 domain-containing protein	355.398	-2.3947	0.190162	0.362747	-6.60156	4.06862e-11	4.88743e-09	-1
lcl|CP020619.1_cds_ARG45526.1_1057	B7H15_05420	cysteine protease staphopain B	4131.69	-2.20426	0.216996	0.285217	-7.72835	1.08946e-14	2.09393e-12	-1
lcl|CP020619.1_cds_ARG45105.1_609	B7H15_03160	protein VraX	313.932	-1.96389	0.256337	0.300279	-6.54021	6.14325e-11	6.94548e-09	-1
lcl|CP020619.1_cds_ARG45992.1_1546	B7H15_07875	Panton-Valentine bi-component leukocidin subunit F	2603.34	-2.40992	0.188167	0.256143	-9.40849	5.03332e-21	4.83702e-18	-1
lcl|CP020619.1_cds_ARG45993.1_1547	B7H15_07880	Panton-Valentine bi-component leukocidin subunit S	2391.95	-2.43822	0.184511	0.268025	-9.09701	9.2851e-20	4.46149e-17	-1
lcl|CP020619.1_cds_ARG47401.1_2856	B7H15_14690	zinc metalloproteinase aureolysin	886.006	-2.51607	0.174818	0.30637	-8.21254	2.1655e-16	5.94586e-14	-1

## Sheet: JE2 WT (A)-JE2 WT (CO2) 8h
ID	Gene	Annotation	baseMean	log2FoldChange	Fold change WT 8h (A) vs WT (CO2) 8h	lfcSE	stat	pvalue	padj
lcl|CP020619.1_cds_ARG47018.1_2637	B7H15_13595	osmoprotectant ABC transporter substrate-binding protein	609.251	1.19744	2.29332	0.192819	6.21017	5.29285e-10	4.84421e-08
lcl|CP020619.1_cds_ARG46851.1_2461	B7H15_12715	urease accessory protein UreG	392.009	1.08073	2.11511	0.230093	4.69694	2.64091e-06	0.000118042
lcl|CP020619.1_cds_ARG46863.1_2473	B7H15_12775	CHAP domain-containing protein	5123.9	1.99071	3.97433	0.446449	4.45899	8.23466e-06	0.000293093
lcl|CP020619.1_cds_ARG46850.1_2460	B7H15_12710	urease accessory protein UreF	402.12	1.18841	2.27901	0.247601	4.7997	1.58904e-06	7.63533e-05
lcl|CP020619.1_cds_ARG45586.1_1120	B7H15_05735	Nramp family divalent metal transporter	1092.67	1.21854	2.32711	0.163475	7.45399	9.0561e-14	1.33891e-11
lcl|CP020619.1_cds_ARG46849.1_2459	gene=ureE	#N/A	285.611	1.21492	2.32128	0.268883	4.5184	6.23094e-06	0.000244405
lcl|CP020619.1_cds_ARG47048.1_2669	B7H15_13755	AbgT family transporter	692.071	1.01077	2.01499	0.270461	3.73721	0.000186074	0.00393005
lcl|CP020619.1_cds_ARG47020.1_2639	B7H15_13605	ABC transporter ATP-binding protein	664.756	1.10361	2.14891	0.283714	3.88987	0.000100299	0.00242417
lcl|CP020619.1_cds_ARG47019.1_2638	B7H15_13600	ABC transporter permease	308.802	1.08512	2.12155	0.250286	4.33551	1.45425e-05	0.000481909
lcl|CP020619.1_cds_ARG45687.1_1227	B7H15_06275	orotidine-5\\'-phosphate decarboxylase	413.27	1.30589	2.47237	0.416707	3.13384	0.00172536	0.02403
lcl|CP020619.1_cds_ARG47016.1_2635	B7H15_13585	MFS transporter	1140.19	1.14378	2.2096	0.159184	7.1853	6.70584e-13	9.20616e-11
lcl|CP020619.1_cds_ARG44929.1_425	B7H15_02135	xanthine phosphoribosyltransferase	957.626	1.2863	2.43901	0.356417	3.60897	0.00030742	0.00573651
lcl|CP020619.1_cds_ARG45688.1_1228	B7H15_06280	orotate phosphoribosyltransferase	314.726	1.25217	2.38199	0.404045	3.09908	0.00194123	0.02591
lcl|CP020619.1_cds_ARG44713.1_194	B7H15_00980	acyl-CoA/acyl-ACP dehydrogenase	3986.36	1.70751	3.26596	0.24516	6.96488	3.2869e-12	4.21161e-10
lcl|CP020619.1_cds_ARG46848.1_2458	B7H15_12700	urease subunit alpha	826.77	1.26826	2.4087	0.241703	5.24717	1.54457e-07	8.99594e-06
lcl|CP020619.1_cds_ARG44709.1_190	B7H15_00960	DUF4242 domain-containing protein	2494.75	1.86393	3.63999	0.288132	6.46901	9.86449e-11	1.05331e-08
lcl|CP020619.1_cds_ARG47371.1_2199	B7H15_11335	YeeE/YedE family protein	466.561	1.048	2.06767	0.335147	3.127	0.00176599	0.0242445
lcl|CP020619.1_cds_ARG45686.1_1226	B7H15_06270	carbamoyl-phosphate synthase large subunit	1789.71	1.40236	2.64334	0.430279	3.2592	0.00111727	0.0170428
lcl|CP020619.1_cds_ARG45684.1_1224	B7H15_06260	dihydroorotase	647.321	1.62035	3.07449	0.430759	3.76161	0.000168824	0.00360532
lcl|CP020619.1_cds_ARG45683.1_1223	B7H15_06255	aspartate carbamoyltransferase catalytic subunit	419.188	1.68778	3.2216	0.419096	4.02719	5.64483e-05	0.00154991
lcl|CP020619.1_cds_ARG47007.1_2626	B7H15_13540	amino acid permease	861.738	1.43814	2.70972	0.320066	4.49327	7.01371e-06	0.000264321
lcl|CP020619.1_cds_ARG44710.1_191	B7H15_00965	ABC transporter ATP-binding protein	2870.97	1.89549	3.7205	0.277153	6.83916	7.96598e-12	9.00624e-10
lcl|CP020619.1_cds_ARG44712.1_193	B7H15_00975	ABC transporter permease	2552.92	2.24161	4.72926	0.217684	10.2975	7.22916e-25	3.47361e-22
lcl|CP020619.1_cds_ARG44930.1_426	B7H15_02140	purine permease	2434.68	1.2875	2.44104	0.264588	4.86606	1.13847e-06	5.91389e-05
lcl|CP020619.1_cds_ARG45682.1_1222	B7H15_06250	uracil permease	335.312	1.5206	2.86911	0.488601	3.11216	0.00185726	0.0249626
lcl|CP020619.1_cds_ARG44711.1_192	B7H15_00970	ABC transporter substrate-binding protein	3428.93	2.05966	4.16888	0.260573	7.90435	2.69331e-15	4.31379e-13
lcl|CP020619.1_cds_ARG46852.1_2462	B7H15_12720	urease accessory protein UreD	509.447	1.06449	2.09142	0.228835	4.65176	3.29115e-06	0.000140569
lcl|CP020619.1_cds_ARG47164.1_2800	B7H15_14410	glyoxalase/bleomycin resistance/extradiol dioxygenase family protein	565.053	1.02257	2.03154	0.241362	4.23667	2.26861e-05	0.000726712
lcl|CP020619.1_cds_ARG47161.1_2797	B7H15_14395	quinone-dependent dihydroorotate dehydrogenase	474.096	1.01097	2.01526	0.26771	3.77634	0.000159149	0.0034369
lcl|CP020619.1_cds_ARG45170.1_685	B7H15_03540	sodium:proton antiporter	1984.96	-1.13551	0.455173	0.182052	-6.2373	4.452e-10	4.27837e-08
lcl|CP020619.1_cds_ARG45576.1_1110	B7H15_05685	2-oxo acid dehydrogenase subunit E2	14226.4	-1.17407	0.443171	0.237061	-4.95258	7.32352e-07	3.90994e-05
lcl|CP020619.1_cds_ARG45665.1_1202	B7H15_06150	16S rRNA (cytosine(1402)-N(4))-methyltransferase RsmH	3391.72	-1.12843	0.457412	0.1402	-8.04871	8.36736e-16	1.46201e-13
lcl|CP020619.1_cds_ARG45664.1_1201	B7H15_06145	division/cell wall cluster transcriptional repressor MraZ	2454.06	-1.11712	0.461014	0.138639	-8.05773	7.77254e-16	1.46201e-13
lcl|CP020619.1_cds_ARG45667.1_1204	B7H15_06160	penicillin-binding protein	1778.66	-1.22121	0.428922	0.226662	-5.38782	7.1318e-08	4.5691e-06
lcl|CP020619.1_cds_ARG44716.1_197	B7H15_00995	MFS transporter	2690.05	-1.92531	0.263285	0.218366	-8.81688	1.17692e-18	3.23148e-16
lcl|CP020619.1_cds_ARG47306.1_198	B7H15_01000	amino acid adenylation domain-containing protein	17079.7	-1.87618	0.272404	0.202557	-9.26247	1.99755e-20	6.39882e-18
lcl|CP020619.1_cds_ARG47370.1_2191	B7H15_11295	GHKL domain-containing protein	22852.4	-1.00034	0.49988	0.264534	-3.78153	0.000155865	0.0034369
lcl|CP020619.1_cds_ARG45575.1_1109	B7H15_05680	alpha-ketoacid dehydrogenase subunit beta	9614.73	-1.14536	0.452077	0.253913	-4.51083	6.4576e-06	0.00024823
lcl|CP020619.1_cds_ARG45385.1_912	B7H15_04685	DUF4888 domain-containing protein	355.398	-1.94003	0.26061	0.371516	-5.22194	1.77063e-07	1.00093e-05
lcl|CP020619.1_cds_ARG45526.1_1057	B7H15_05420	cysteine protease staphopain B	4131.69	-2.85951	0.137785	0.285276	-10.0237	1.19983e-23	4.61213e-21
lcl|CP020619.1_cds_ARG45992.1_1546	B7H15_07875	Panton-Valentine bi-component leukocidin subunit F	2603.34	-2.95579	0.12889	0.256505	-11.5233	1.0067e-30	9.67437e-28
lcl|CP020619.1_cds_ARG47332.1_875	B7H15_04500	phosphoglycerate mutase family protein	364.759	-1.07194	0.475679	0.192819	-5.55932	2.70829e-08	1.9279e-06
lcl|CP020619.1_cds_ARG45113.1_617	B7H15_03200	#N/A	9728.13	-1.00542	0.498126	0.322024	-3.12218	0.00179519	0.0244706
lcl|CP020619.1_cds_ARG44717.1_199	B7H15_01005	4\\'-phosphopantetheinyl transferase superfamily protein	2581.59	-2.00028	0.249951	0.227675	-8.78568	1.55421e-18	3.73398e-16
lcl|CP020619.1_cds_ARG44715.1_196	B7H15_00990	NAD-dependent formate dehydrogenase	9686.72	-2.16208	0.223434	0.182741	-11.8314	2.68647e-32	5.1634e-29
lcl|CP020619.1_cds_ARG44671.1_148	B7H15_00750	cell-wall-anchored protein SasD	682.906	-1.36512	0.388203	0.328674	-4.1534	3.27567e-05	0.000999339
lcl|CP020619.1_cds_ARG45666.1_1203	B7H15_06155	cell division protein FtsL	1191.7	-1.02361	0.491883	0.194576	-5.26074	1.4348e-07	8.6178e-06
lcl|CP020619.1_cds_ARG45993.1_1547	B7H15_07880	Panton-Valentine bi-component leukocidin subunit S	2391.95	-2.89199	0.134717	0.268513	-10.7704	4.74974e-27	3.043e-24
lcl|CP020619.1_cds_ARG47401.1_2856	B7H15_14690	zinc metalloproteinase aureolysin	886.006	-2.75208	0.148437	0.321705	-8.55465	1.18226e-17	2.52478e-15
lcl|CP020619.1_cds_ARG47184.1_2821	B7H15_14515	betaine-aldehyde dehydrogenase	917.788	-1.38439	0.383052	0.200133	-6.91734	4.60215e-12	5.52834e-10
lcl|CP020619.1_cds_ARG46745.1_2346	B7H15_12140	D-ornithine--citrate ligase SfaD	912.407	-1.17934	0.441554	0.299524	-3.93738	8.23751e-05	0.00213953
lcl|CP020619.1_cds_ARG45577.1_1111	B7H15_05690	dihydrolipoyl dehydrogenase	21691.4	-1.27818	0.412316	0.223426	-5.7208	1.06021e-08	7.83743e-07
